# Supplementary material
Source: PubMed Central journal article supplement (PMC2950210)
Supplement: NIHMS231853-supplement-03.pdf [file NIHMS231853-supplement-03.pdf]

## PSI Blast for

gi|112497046|gb|ABI20163.1| 14.5 kDa salivary...

a member of the 15-17 kDa insect protein family

- No new sequences were found above the 1e-05 threshold

### [Reference](#)

Stephen F. Altschul, Thomas L. Madden, Alejandro A. Schäffer, Jinghui Zhang, Zheng Zhang, Webb Miller, and David J. Lipman (1997), "Gapped BLAST and PSI-BLAST: a new generation of protein database search programs", Nucleic Acids Res. 25:3389-3402.

### [Reference - composition-based statistics starting in round 2](#)

Alejandro A. Schäffer, L. Aravind, Thomas L. Madden, Sergei Shavirin, John L. Spouge, Yuri I. Wolf, Eugene V. Koonin, and Stephen F. Altschul (2001), "Improving the accuracy of PSI-BLAST protein database searches with composition-based statistics and other refinements", Nucleic Acids Res. 29:2994-3005.

#### Search Parameters

##### Search parameter name Search parameter value

|                         |          |
|-------------------------|----------|
| Program                 | blastp   |
| Word size               | 3        |
| Expect value            | 10       |
| Hitlist size            | 10000    |
| Gapcosts                | 11,1     |
| Matrix                  | BLOSUM62 |
| Filter string           | F        |
| Genetic Code            | 1        |
| Window Size             | 40       |
| Threshold               | 11       |
| Composition-based stats | 1        |

#### Database

##### Database parameter name Database parameter value

|                     |                      |
|---------------------|----------------------|
| Posted date         | Feb 16, 2010 5:41 PM |
| Number of letters   | 3,560,334,713        |
| Number of sequences | 10,435,126           |
| Entrez query        | none                 |

#### Karlin-Altschul statistics

##### Params Ungapped Gapped

|        |          |           |
|--------|----------|-----------|
| Lambda | 0.315147 | 0.267     |
| K      | 0.133848 | 0.0449541 |
| H      | 0.378164 | 0.14      |

#### Results Statistics

##### Results Statistics parameter name Results Statistics parameter value

Length adjustment 101  
 Effective length of query 35  
 Effective length of database 2506386987  
 Effective search space 87723544545  
 Effective search space used 87723544545

Sequences with pattern at position and E-value BETTER than threshold

| Sequences producing significant alignments: |                                                                                  | Score<br>(Bits)     | E<br>Value |           |
|---------------------------------------------|----------------------------------------------------------------------------------|---------------------|------------|-----------|
|                                             | <a href="#">gb ABI20163.1</a> 14.5 kDa salivary protein [Phlebotomus duboscqi]   | <a href="#">128</a> | 3e-28      |           |
|                                             | <a href="#">gb ACF72876.1</a> unknown [Ochlerotatus taeniorhynchus]              | <a href="#">126</a> | 6e-28      |           |
|                                             | <a href="#">ref XP_001850045.1</a> conserved hypothetical protein [Culex qui...] | <a href="#">126</a> | 8e-28      | <b>UG</b> |
|                                             | <a href="#">ref XP_001650838.1</a> hypothetical protein AaeL_AAEL005428 [Aed...] | <a href="#">126</a> | 9e-28      | <b>UG</b> |
|                                             | <a href="#">ref XP_002101617.1</a> GE15521 [Drosophila yakuba] >gb EDX02725....  | <a href="#">125</a> | 1e-27      | <b>G</b>  |
|                                             | <a href="#">ref XP_002039288.1</a> GM22809 [Drosophila sechellia] >ref XP_00...  | <a href="#">125</a> | 2e-27      | <b>G</b>  |
|                                             | <a href="#">ref NP_573299.1</a> CG15044 [Drosophila melanogaster] >gb AAL488...  | <a href="#">125</a> | 2e-27      | <b>UG</b> |
|                                             | <a href="#">gb ABV44740.1</a> 13.6 kDa midgut protein [Phlebotomus papatasi]     | <a href="#">122</a> | 1e-26      |           |
|                                             | <a href="#">gb ABV60331.1</a> 11.6 kDa midgut protein [Lutzomyia longipalpis]    | <a href="#">121</a> | 2e-26      |           |
|                                             | <a href="#">ref NP_001033959.1</a> CG33998 [Drosophila melanogaster] >tpg DA...  | <a href="#">121</a> | 2e-26      | <b>UG</b> |
|                                             | <a href="#">ref XP_001961218.1</a> GF11112 [Drosophila ananassae] >gb EDV380...  | <a href="#">121</a> | 3e-26      | <b>G</b>  |
|                                             | <a href="#">ref XP_002026810.1</a> GL27028 [Drosophila persimilis] >gb EDW33...  | <a href="#">121</a> | 3e-26      | <b>G</b>  |
|                                             | <a href="#">ref XP_002059070.1</a> GJ15191 [Drosophila virilis] >gb EDW58139...  | <a href="#">120</a> | 3e-26      | <b>G</b>  |
|                                             | <a href="#">ref XP_002015909.1</a> GL10767 [Drosophila persimilis] >gb EDW31...  | <a href="#">120</a> | 4e-26      | <b>G</b>  |
|                                             | <a href="#">ref XP_001974726.1</a> GG21920 [Drosophila erecta] >gb EDV55126....  | <a href="#">120</a> | 4e-26      | <b>G</b>  |
|                                             | <a href="#">gb ACI30042.1</a> hypothetical secreted protein [Anopheles darli...] | <a href="#">120</a> | 4e-26      |           |
|                                             | <a href="#">ref XP_002071202.1</a> GK25257 [Drosophila willistoni] >gb EDW82...  | <a href="#">120</a> | 5e-26      | <b>G</b>  |
|                                             | <a href="#">ref XP_002048773.1</a> GJ21142 [Drosophila virilis] >gb EDW59966...  | <a href="#">119</a> | 8e-26      | <b>G</b>  |
|                                             | <a href="#">ref XP_001354364.2</a> GA13455 [Drosophila pseudoobscura pseudoo...] | <a href="#">119</a> | 9e-26      | <b>G</b>  |
|                                             | <a href="#">ref XP_001230950.2</a> AGAP003713-PA [Anopheles gambiae str. PES...] | <a href="#">118</a> | 2e-25      | <b>UG</b> |
|                                             | <a href="#">ref XP_001977671.1</a> GG18116 [Drosophila erecta] >gb EDV46598....  | <a href="#">118</a> | 2e-25      | <b>G</b>  |
|                                             | <a href="#">ref XP_001354363.1</a> GA13456 [Drosophila pseudoobscura pseudoo...] | <a href="#">118</a> | 2e-25      | <b>G</b>  |
|                                             | <a href="#">ref XP_002138284.1</a> GA24478 [Drosophila pseudoobscura pseudoo...] | <a href="#">117</a> | 4e-25      | <b>G</b>  |
|                                             | <a href="#">gb ACD81831.1</a> IP21621p [Drosophila melanogaster]                 | <a href="#">116</a> | 6e-25      |           |
|                                             | <a href="#">ref XP_002071201.1</a> GK25258 [Drosophila willistoni] >gb EDW82...  | <a href="#">116</a> | 6e-25      | <b>G</b>  |
|                                             | <a href="#">ref XP_001987728.1</a> GH22082 [Drosophila grimshawi] >gb EDW025...  | <a href="#">116</a> | 8e-25      | <b>G</b>  |
|                                             | <a href="#">ref XP_002009841.1</a> GI15587 [Drosophila mojavensis] >gb EDW07...  | <a href="#">116</a> | 9e-25      | <b>G</b>  |
|                                             | <a href="#">ref XP_002082142.1</a> GD11406 [Drosophila simulans] >gb EDX0772...  | <a href="#">116</a> | 1e-24      | <b>G</b>  |
|                                             | <a href="#">ref XP_002034496.1</a> GM21912 [Drosophila sechellia] >gb EDW485...  | <a href="#">115</a> | 2e-24      | <b>G</b>  |
|                                             | <a href="#">ref XP_001990970.1</a> GH12337 [Drosophila grimshawi] >gb EDV995...  | <a href="#">115</a> | 2e-24      | <b>G</b>  |
|                                             | <a href="#">gb ABV60298.1</a> 14.3 kDa midgut protein [Lutzomyia longipalpis]    | <a href="#">115</a> | 2e-24      |           |
|                                             | <a href="#">ref XP_002009842.1</a> GI15588 [Drosophila mojavensis] >gb EDW07...  | <a href="#">114</a> | 4e-24      | <b>G</b>  |

|  |                          |                                    |                                                   |                     |       |           |
|--|--------------------------|------------------------------------|---------------------------------------------------|---------------------|-------|-----------|
|  | <input type="checkbox"/> | <a href="#">ref XP_001990969.1</a> | GH12339 [Drosophila grimshawi] >gb EDV995...      | <a href="#">113</a> | 7e-24 | <b>G</b>  |
|  | <input type="checkbox"/> | <a href="#">ref XP_002061455.1</a> | GK20920 [Drosophila willistoni] >gb EDW72...      | <a href="#">112</a> | 9e-24 | <b>G</b>  |
|  | <input type="checkbox"/> | <a href="#">ref XP_002101618.1</a> | GE15520 [Drosophila yakuba] >gb EDX02726...       | <a href="#">112</a> | 1e-23 | <b>G</b>  |
|  | <input type="checkbox"/> | <a href="#">ref XP_002050287.1</a> | GJ20290 [Drosophila virilis] >gb EDW61480...      | <a href="#">112</a> | 1e-23 | <b>G</b>  |
|  | <input type="checkbox"/> | <a href="#">ref XP_002004523.1</a> | GI19567 [Drosophila mojavensis] >gb EDW08...      | <a href="#">112</a> | 1e-23 | <b>G</b>  |
|  | <input type="checkbox"/> | <a href="#">ref XP_001986843.1</a> | GH21597 [Drosophila grimshawi] >gb EDW017...      | <a href="#">111</a> | 2e-23 | <b>G</b>  |
|  | <input type="checkbox"/> | <a href="#">gb AAQ09813.1</a>      | CG15043 [Drosophila yakuba]                       | <a href="#">111</a> | 2e-23 |           |
|  | <input type="checkbox"/> | <a href="#">ref XP_001965516.1</a> | GF22411 [Drosophila ananassae] >gb EDV350...      | <a href="#">111</a> | 2e-23 | <b>G</b>  |
|  | <input type="checkbox"/> | <a href="#">ref XP_001965515.1</a> | GF22412 [Drosophila ananassae] >gb EDV350...      | <a href="#">111</a> | 2e-23 | <b>G</b>  |
|  | <input type="checkbox"/> | <a href="#">ref XP_001238394.2</a> | AGAP011630-PA [Anopheles gambiae str. PES...      | <a href="#">111</a> | 2e-23 | <b>UG</b> |
|  | <input type="checkbox"/> | <a href="#">ref XP_001360670.1</a> | GA12205 [Drosophila pseudoobscura pseudoo...      | <a href="#">111</a> | 2e-23 | <b>G</b>  |
|  | <input type="checkbox"/> | <a href="#">gb ABR27888.1</a>      | putative salivary secreted protein [Triatoma i... | <a href="#">111</a> | 3e-23 |           |
|  | <input type="checkbox"/> | <a href="#">ref XP_002016256.1</a> | GL10591 [Drosophila persimilis] >gb EDW32...      | <a href="#">110</a> | 3e-23 | <b>G</b>  |
|  | <input type="checkbox"/> | <a href="#">ref XP_002062967.1</a> | GK21639 [Drosophila willistoni] >gb EDW73...      | <a href="#">110</a> | 4e-23 | <b>G</b>  |
|  | <input type="checkbox"/> | <a href="#">gb ABR27890.1</a>      | putative salivary secreted peptide [Triatoma i... | <a href="#">110</a> | 7e-23 |           |
|  | <input type="checkbox"/> | <a href="#">ref XP_002059069.1</a> | GJ15192 [Drosophila virilis] >gb EDW58138...      | <a href="#">109</a> | 1e-22 | <b>G</b>  |
|  | <input type="checkbox"/> | <a href="#">ref XP_002059818.1</a> | GJ15031 [Drosophila virilis] >gb EDW57155...      | <a href="#">109</a> | 1e-22 | <b>G</b>  |
|  | <input type="checkbox"/> | <a href="#">ref XP_001997725.1</a> | GH17985 [Drosophila grimshawi] >gb EDW049...      | <a href="#">108</a> | 2e-22 | <b>G</b>  |
|  | <input type="checkbox"/> | <a href="#">ref XP_001977672.1</a> | GG18115 [Drosophila erecta] >gb EDV46599...       | <a href="#">108</a> | 2e-22 | <b>G</b>  |
|  | <input type="checkbox"/> | <a href="#">gb AAV84229.1</a>      | unknown [Culicoides sonorensis]                   | <a href="#">108</a> | 2e-22 |           |
|  | <input type="checkbox"/> | <a href="#">ref XP_002005185.1</a> | GI19218 [Drosophila mojavensis] >gb EDW09...      | <a href="#">108</a> | 2e-22 | <b>G</b>  |
|  | <input type="checkbox"/> | <a href="#">ref XP_001660534.1</a> | hypothetical protein AaeL_AAEL009985 [Aed...      | <a href="#">108</a> | 3e-22 | <b>UG</b> |
|  | <input type="checkbox"/> | <a href="#">ref XP_002050017.1</a> | GJ21904 [Drosophila virilis] >gb EDW61210...      | <a href="#">107</a> | 3e-22 | <b>G</b>  |
|  | <input type="checkbox"/> | <a href="#">ref XP_001986842.1</a> | GH21596 [Drosophila grimshawi] >gb EDW017...      | <a href="#">107</a> | 4e-22 | <b>G</b>  |
|  | <input type="checkbox"/> | <a href="#">ref XP_002004350.1</a> | GI19667 [Drosophila mojavensis] >gb EDW08...      | <a href="#">107</a> | 5e-22 | <b>G</b>  |
|  | <input type="checkbox"/> | <a href="#">ref NP_573300.1</a>    | CG15043 [Drosophila melanogaster] >gb AAF488...   | <a href="#">107</a> | 5e-22 | <b>UG</b> |
|  | <input type="checkbox"/> | <a href="#">gb AAV84228.1</a>      | unknown [Culicoides sonorensis]                   | <a href="#">106</a> | 6e-22 |           |
|  | <input type="checkbox"/> | <a href="#">ref XP_001868963.1</a> | 14.5 kDa salivary protein [Culex quinquef...      | <a href="#">106</a> | 6e-22 | <b>UG</b> |
|  | <input type="checkbox"/> | <a href="#">ref XP_002063501.1</a> | GK21373 [Drosophila willistoni] >gb EDW74...      | <a href="#">106</a> | 7e-22 | <b>G</b>  |
|  | <input type="checkbox"/> | <a href="#">gb ACT79296.1</a>      | putative fatbody protein 3Rev-G1 [Bombyx mori]    | <a href="#">106</a> | 7e-22 |           |
|  | <input type="checkbox"/> | <a href="#">ref XP_001975823.1</a> | GG22531 [Drosophila erecta] >gb EDV56223...       | <a href="#">106</a> | 7e-22 | <b>G</b>  |
|  | <input type="checkbox"/> | <a href="#">ref XP_002005815.1</a> | GI18871 [Drosophila mojavensis] >gb EDW09...      | <a href="#">106</a> | 7e-22 | <b>G</b>  |
|  | <input type="checkbox"/> | <a href="#">gb ABV44744.1</a>      | 14.4 kDa midgut protein [Phlebotomus papatasi]    | <a href="#">106</a> | 7e-22 |           |
|  | <input type="checkbox"/> | <a href="#">ref XP_002081284.1</a> | GD25794 [Drosophila simulans] >gb EDX0686...      | <a href="#">106</a> | 7e-22 | <b>G</b>  |
|  | <input type="checkbox"/> | <a href="#">ref XP_001664091.1</a> | hypothetical protein AaeL_AAEL013885 [Aed...      | <a href="#">106</a> | 9e-22 | <b>UG</b> |
|  | <input type="checkbox"/> | <a href="#">ref XP_001987508.1</a> | GH21960 [Drosophila grimshawi] >gb EDW023...      | <a href="#">106</a> | 9e-22 | <b>G</b>  |
|  | <input type="checkbox"/> | <a href="#">gb ACN69173.1</a>      | hypothetical conserved secreted protein [Stomo... | <a href="#">106</a> | 1e-21 |           |
|  | <input type="checkbox"/> | <a href="#">ref XP_002107315.1</a> | GD15631 [Drosophila simulans] >gb EDX1829...      | <a href="#">104</a> | 3e-21 | <b>G</b>  |
|  | <input type="checkbox"/> | <a href="#">ref ZP_05005660.1</a>  | conserved hypothetical protein [Streptomyc...     | <a href="#">104</a> | 3e-21 |           |
|  | <input type="checkbox"/> | <a href="#">ref XP_002101745.1</a> | GE17797 [Drosophila yakuba] >gb EDX02853...       | <a href="#">103</a> | 4e-21 | <b>G</b>  |
|  | <input type="checkbox"/> | <a href="#">ref XP_002028226.1</a> | GL16235 [Drosophila persimilis] >gb EDW38...      | <a href="#">103</a> | 4e-21 | <b>G</b>  |

|  |                          |                                    |                                                   |                      |       |           |
|--|--------------------------|------------------------------------|---------------------------------------------------|----------------------|-------|-----------|
|  | <input type="checkbox"/> | <a href="#">ref XP_002039289.1</a> | GM22808 [Drosophila sechellia] >gb EDW560...      | <a href="#">103</a>  | 7e-21 | <b>G</b>  |
|  | <input type="checkbox"/> | <a href="#">ref XP_001959559.1</a> | GF11989 [Drosophila ananassae] >gb EDV363...      | <a href="#">103</a>  | 8e-21 | <b>G</b>  |
|  | <input type="checkbox"/> | <a href="#">ref XP_002076927.1</a> | GD24776 [Drosophila simulans] >gb EDX1652...      | <a href="#">103</a>  | 8e-21 | <b>G</b>  |
|  | <input type="checkbox"/> | <a href="#">ref NP_001155164.1</a> | venom protein R [Nasonia vitripennis]             | <a href="#">103</a>  | 9e-21 | <b>UG</b> |
|  | <input type="checkbox"/> | <a href="#">ref NP_001033839.1</a> | CG34026 [Drosophila melanogaster] >gb ABC...      | <a href="#">102</a>  | 1e-20 | <b>UG</b> |
|  | <input type="checkbox"/> | <a href="#">ref ZP_05006207.1</a>  | conserved hypothetical protein [Streptomyc...     | <a href="#">102</a>  | 1e-20 |           |
|  | <input type="checkbox"/> | <a href="#">ref XP_001868961.1</a> | 14.5 kDa salivary protein [Culex quinquef...      | <a href="#">102</a>  | 1e-20 | <b>UG</b> |
|  | <input type="checkbox"/> | <a href="#">ref XP_001868962.1</a> | conserved hypothetical protein [Culex qui...      | <a href="#">102</a>  | 1e-20 | <b>UG</b> |
|  | <input type="checkbox"/> | <a href="#">ref XP_002063499.1</a> | GK21944 [Drosophila willistoni] >gb EDW74...      | <a href="#">102</a>  | 1e-20 | <b>G</b>  |
|  | <input type="checkbox"/> | <a href="#">ref XP_001865641.1</a> | conserved hypothetical protein [Culex qui...      | <a href="#">101</a>  | 2e-20 | <b>G</b>  |
|  | <input type="checkbox"/> | <a href="#">ref XP_001975824.1</a> | GG22532 [Drosophila erecta] >gb EDV56224...       | <a href="#">101</a>  | 2e-20 | <b>G</b>  |
|  | <input type="checkbox"/> | <a href="#">ref XP_001987095.1</a> | GH21729 [Drosophila grimshawi] >gb EDW019...      | <a href="#">101</a>  | 2e-20 | <b>G</b>  |
|  | <input type="checkbox"/> | <a href="#">ref XP_001865369.1</a> | conserved hypothetical protein [Culex qui...      | <a href="#">101</a>  | 3e-20 | <b>UG</b> |
|  | <input type="checkbox"/> | <a href="#">ref XP_002041778.1</a> | GM11373 [Drosophila sechellia] >gb EDW456...      | <a href="#">101</a>  | 3e-20 | <b>G</b>  |
|  | <input type="checkbox"/> | <a href="#">ref XP_001664100.1</a> | hypothetical protein AaeL_AAEL013895 [Aed...      | <a href="#">101</a>  | 4e-20 | <b>UG</b> |
|  | <input type="checkbox"/> | <a href="#">gb ABH10141.1</a>      | HMG176 [Helicoverpa armigera] >gb ABK29472.1  ... | <a href="#">100</a>  | 5e-20 |           |
|  | <input type="checkbox"/> | <a href="#">gb ABV44709.1</a>      | 18 kDa midgut protein [Phlebotomus papatasi]      | <a href="#">100</a>  | 6e-20 |           |
|  | <input type="checkbox"/> | <a href="#">ref XP_001604583.1</a> | PREDICTED: hypothetical protein [Nasonia ...      | <a href="#">100</a>  | 6e-20 | <b>UG</b> |
|  | <input type="checkbox"/> | <a href="#">ref XP_002016257.1</a> | GL10590 [Drosophila persimilis] >gb EDW32...      | <a href="#">100</a>  | 7e-20 | <b>G</b>  |
|  | <input type="checkbox"/> | <a href="#">ref XP_001965768.1</a> | GF20010 [Drosophila ananassae] >gb EDV414...      | <a href="#">100</a>  | 7e-20 | <b>G</b>  |
|  | <input type="checkbox"/> | <a href="#">ref XP_001649836.1</a> | hypothetical protein AaeL_AAEL004809 [Aed...      | <a href="#">99.6</a> | 8e-20 | <b>UG</b> |
|  | <input type="checkbox"/> | <a href="#">ref XP_001604165.1</a> | PREDICTED: hypothetical protein [Nasonia ...      | <a href="#">99.6</a> | 9e-20 | <b>UG</b> |
|  | <input type="checkbox"/> | <a href="#">ref XP_001599861.1</a> | PREDICTED: similar to CG34026-PA [Nasonia...      | <a href="#">99.2</a> | 1e-19 | <b>UG</b> |
|  | <input type="checkbox"/> | <a href="#">ref XP_002028229.1</a> | GL16227 [Drosophila persimilis] >gb EDW38...      | <a href="#">99.2</a> | 1e-19 | <b>G</b>  |
|  | <input type="checkbox"/> | <a href="#">ref XP_002099025.1</a> | Acp225 [Drosophila yakuba] >gb EDW98737.1...      | <a href="#">99.2</a> | 1e-19 | <b>G</b>  |
|  | <input type="checkbox"/> | <a href="#">gb ABW82136.2</a>      | IP21714p [Drosophila melanogaster]                | <a href="#">98.8</a> | 1e-19 |           |
|  | <input type="checkbox"/> | <a href="#">gb ACD99549.1</a>      | IP21514p [Drosophila melanogaster] >gb ACD9955... | <a href="#">98.8</a> | 2e-19 |           |
|  | <input type="checkbox"/> | <a href="#">ref XP_001865640.1</a> | hypothetical protein CpipJ_CPIJ015171 [Cu...      | <a href="#">98.5</a> | 2e-19 | <b>UG</b> |
|  | <input type="checkbox"/> | <a href="#">gb ACO72873.1</a>      | MIP04578p [Drosophila melanogaster]               | <a href="#">98.5</a> | 2e-19 |           |
|  | <input type="checkbox"/> | <a href="#">ref XP_001599834.1</a> | PREDICTED: similar to putative salivary s...      | <a href="#">98.5</a> | 2e-19 | <b>UG</b> |
|  | <input type="checkbox"/> | <a href="#">gb ABD97958.1</a>      | ACP225 [Drosophila yakuba]                        | <a href="#">98.1</a> | 2e-19 |           |
|  | <input type="checkbox"/> | <a href="#">gb ABD97961.1</a>      | ACP225 [Drosophila yakuba]                        | <a href="#">98.1</a> | 3e-19 |           |
|  | <input type="checkbox"/> | <a href="#">gb ABD97965.1</a>      | ACP225 [Drosophila yakuba]                        | <a href="#">97.7</a> | 3e-19 |           |
|  | <input type="checkbox"/> | <a href="#">gb ABD97960.1</a>      | ACP225 [Drosophila yakuba]                        | <a href="#">97.7</a> | 3e-19 |           |
|  | <input type="checkbox"/> | <a href="#">ref NP_726308.1</a>    | CG30413 [Drosophila melanogaster] >gb AAM682...   | <a href="#">97.7</a> | 4e-19 | <b>UG</b> |
|  | <input type="checkbox"/> | <a href="#">ref XP_001603272.1</a> | PREDICTED: similar to ENSANGP00000031402 ...      | <a href="#">97.7</a> | 4e-19 | <b>G</b>  |
|  | <input type="checkbox"/> | <a href="#">gb ABD97959.1</a>      | ACP225 [Drosophila yakuba]                        | <a href="#">97.7</a> | 4e-19 |           |
|  | <input type="checkbox"/> | <a href="#">ref XP_001965767.1</a> | GF20011 [Drosophila ananassae] >gb EDV414...      | <a href="#">97.3</a> | 5e-19 | <b>G</b>  |
|  | <input type="checkbox"/> | <a href="#">gb ABQ18257.1</a>      | unknown [Lygus lineolaris]                        | <a href="#">97.3</a> | 5e-19 |           |
|  | <input type="checkbox"/> | <a href="#">ref XP_002050018.1</a> | GJ20423 [Drosophila virilis] >gb EDW61211...      | <a href="#">97.3</a> | 5e-19 | <b>G</b>  |
|  | <input type="checkbox"/> | <a href="#">gb ABD97966.1</a>      | ACP225 [Drosophila yakuba]                        | <a href="#">97.3</a> | 5e-19 |           |

|                                     |                                        |                                                                   |                      |       |           |
|-------------------------------------|----------------------------------------|-------------------------------------------------------------------|----------------------|-------|-----------|
| <input checked="" type="checkbox"/> | <a href="#">gb ABD97964.1</a>          | ACP225 [Drosophila yakuba]                                        | <a href="#">96.5</a> | 7e-19 |           |
| <input checked="" type="checkbox"/> | <a href="#">ref XP_002033647.1</a>     | GM20317 [Drosophila sechellia] >gb EDW476...                      | <a href="#">96.5</a> | 8e-19 | <b>G</b>  |
| <input checked="" type="checkbox"/> | <a href="#">ref NP_610832.1</a>        | CG13323 [Drosophila melanogaster] >gb AAF584...                   | <a href="#">96.5</a> | 9e-19 | <b>UG</b> |
| <input checked="" type="checkbox"/> | <a href="#">ref XP_002081283.1</a>     | GD25795 [Drosophila simulans] >gb EDX0686...                      | <a href="#">96.2</a> | 1e-18 | <b>G</b>  |
| <input checked="" type="checkbox"/> | <a href="#">ref NP_610833.1</a>        | CG13324 [Drosophila melanogaster] >gb AAF584...                   | <a href="#">96.2</a> | 1e-18 | <b>UG</b> |
| <input checked="" type="checkbox"/> | <a href="#">ref XP_001602278.1</a>     | PREDICTED: similar to conserved hypotheti...                      | <a href="#">95.4</a> | 2e-18 | <b>G</b>  |
| <input checked="" type="checkbox"/> | <a href="#">ref XP_002071834.1</a>     | GK10198 [Drosophila willistoni] >gb EDW82...                      | <a href="#">95.0</a> | 2e-18 | <b>G</b>  |
| <input checked="" type="checkbox"/> | <a href="#">gb ABI20159.1</a>          | 16 kDa salivary protein [Phlebotomus duboscqi]                    | <a href="#">94.6</a> | 3e-18 |           |
| <input checked="" type="checkbox"/> | <a href="#">gb ABD97962.1</a>          | ACP225 [Drosophila yakuba]                                        | <a href="#">94.6</a> | 3e-18 |           |
| <input checked="" type="checkbox"/> | <a href="#">gb ABD97963.1</a>          | ACP225 [Drosophila yakuba]                                        | <a href="#">92.7</a> | 1e-17 |           |
| <input checked="" type="checkbox"/> | <a href="#">ref XP_001604205.1</a>     | PREDICTED: hypothetical protein [Nasonia ...                      | <a href="#">92.3</a> | 1e-17 | <b>G</b>  |
| <input checked="" type="checkbox"/> | <a href="#">ref XP_001661180.1</a>     | hypothetical protein AaeL_AAEL002263 [Aed...                      | <a href="#">92.3</a> | 1e-17 | <b>UG</b> |
| <input checked="" type="checkbox"/> | <a href="#">ref XP_002028227.1</a>     | GL16228 [Drosophila persimilis] >gb EDW38...                      | <a href="#">91.9</a> | 2e-17 | <b>G</b>  |
| <input checked="" type="checkbox"/> | <a href="#">ref XP_002091873.1</a>     | GE11995 [Drosophila yakuba] >gb EDW91585...                       | <a href="#">91.9</a> | 2e-17 | <b>G</b>  |
| <input checked="" type="checkbox"/> | <a href="#">ref XP_001661179.1</a>     | hypothetical protein AaeL_AAEL002263 [Aed...                      | <a href="#">91.5</a> | 2e-17 | <b>UG</b> |
| <input checked="" type="checkbox"/> | <a href="#">gb ABD97967.1</a>          | ACP225 [Drosophila teissieri]                                     | <a href="#">90.8</a> | 4e-17 |           |
| <input checked="" type="checkbox"/> | <a href="#">gb ACY69959.1</a>          | putative putative salivary secreted protein [C...                 | <a href="#">90.8</a> | 4e-17 |           |
| <input checked="" type="checkbox"/> | <a href="#">gb AAY34548.1</a>          | putative 11.4 kDa secreted salivary gland prot...                 | <a href="#">90.4</a> | 5e-17 |           |
| <input checked="" type="checkbox"/> | <a href="#">ref XP_976138.1</a>        | PREDICTED: hypothetical protein [Tribolium c...                   | <a href="#">90.0</a> | 8e-17 | <b>UG</b> |
| <input checked="" type="checkbox"/> | <a href="#">gb ACI30202.1</a>          | hypothetical conserved mosquito protein [Anoph...                 | <a href="#">90.0</a> | 8e-17 |           |
| <input checked="" type="checkbox"/> | <a href="#">ref XP_002090966.1</a>     | GE13403 [Drosophila yakuba] >gb AAQ09833....                      | <a href="#">89.6</a> | 9e-17 | <b>G</b>  |
| <input checked="" type="checkbox"/> | <a href="#">ref XP_002040057.1</a>     | GM15559 [Drosophila sechellia] >gb EDW569...                      | <a href="#">89.6</a> | 1e-16 | <b>G</b>  |
| <input checked="" type="checkbox"/> | <a href="#">ref XP_002082759.1</a>     | GD25061 [Drosophila simulans] >gb EDX0834...                      | <a href="#">89.6</a> | 1e-16 | <b>G</b>  |
| <input checked="" type="checkbox"/> | <a href="#">ref XP_002086118.1</a>     | GE14474 [Drosophila yakuba] >ref XP_00209...                      | <a href="#">89.2</a> | 1e-16 | <b>G</b>  |
| <input checked="" type="checkbox"/> | <a href="#">gb ABR27885.1</a>          | salivary secreted protein [Triatoma infestans]                    | <a href="#">89.2</a> | 1e-16 |           |
| <input checked="" type="checkbox"/> | <a href="#">ref XP_316478.4</a>        | AGAP006442-PA [Anopheles gambiae str. PEST] ...                   | <a href="#">88.8</a> | 2e-16 | <b>UG</b> |
| <input checked="" type="checkbox"/> | <a href="#">ref XP_001976402.1</a>     | GG22852 [Drosophila erecta] >gb EDV56802....                      | <a href="#">88.4</a> | 2e-16 | <b>G</b>  |
| <input checked="" type="checkbox"/> | <a href="#">ref XP_001987096.1</a>     | GH20161 [Drosophila grimshawi] >gb EDW019...                      | <a href="#">88.4</a> | 2e-16 | <b>G</b>  |
| <input checked="" type="checkbox"/> | <a href="#">ref XP_002033648.1</a>     | GM20316 [Drosophila sechellia] >gb EDW476...                      | <a href="#">88.1</a> | 3e-16 | <b>G</b>  |
| <input checked="" type="checkbox"/> | <a href="#">gb ABN54491.1</a>          | conserved secreted protein [Oncopectus fasciatus]                 | <a href="#">87.7</a> | 4e-16 |           |
| <input checked="" type="checkbox"/> | <a href="#">ref XP_001976379.1</a>     | GG20045 [Drosophila erecta] >gb EDV56779....                      | <a href="#">87.7</a> | 4e-16 | <b>G</b>  |
| <input checked="" type="checkbox"/> | <a href="#">ref XP_002090965.1</a>     | GE13402 [Drosophila yakuba] >gb EDW90677....                      | <a href="#">87.3</a> | 4e-16 | <b>G</b>  |
| <input checked="" type="checkbox"/> | <a href="#">ref NP_724118.1</a>        | CG31789 [Drosophila melanogaster] >gb AAN110...                   | <a href="#">87.3</a> | 4e-16 | <b>UG</b> |
| <input checked="" type="checkbox"/> | <a href="#">ref XP_002038990.1</a>     | GM17281 [Drosophila sechellia] >gb EDW556...                      | <a href="#">87.3</a> | 5e-16 | <b>G</b>  |
| <input checked="" type="checkbox"/> | <a href="#">ref NP_726325.1</a>        | CG30411 [Drosophila melanogaster] >gb AAL485...                   | <a href="#">86.9</a> | 5e-16 | <b>UG</b> |
| <input checked="" type="checkbox"/> | <a href="#">ref XP_002082783.1</a>     | GD11761 [Drosophila simulans] >gb EDX0836...                      | <a href="#">86.9</a> | 6e-16 | <b>G</b>  |
| <input checked="" type="checkbox"/> | <a href="#">ref XP_001604117.1</a>     | PREDICTED: similar to HDC07203 [Nasonia v...                      | <a href="#">86.5</a> | 8e-16 | <b>UG</b> |
| <input checked="" type="checkbox"/> | <a href="#">ref XP_002005814.1</a>     | GI20673 [Drosophila mojavensis] >gb EDW09...                      | <a href="#">86.1</a> | 1e-15 | <b>G</b>  |
| <input checked="" type="checkbox"/> | <a href="#">ref XP_002079800.1</a>     | GD24143 [Drosophila simulans] >gb EDX0538...                      | <a href="#">85.7</a> | 1e-15 | <b>G</b>  |
| <input checked="" type="checkbox"/> | <input type="text" value="229002332"/> | <a href="#">dbj BAH57948.1</a> hypothetical protein [Bombyx mori] | <a href="#">85.7</a> | 2e-15 |           |

|                                     |           |                                    |                                                   |                      |       |           |
|-------------------------------------|-----------|------------------------------------|---------------------------------------------------|----------------------|-------|-----------|
| <input checked="" type="checkbox"/> | 156538599 | <a href="#">ref XP_001607547.1</a> | PREDICTED: similar to HDC07203 [Nasonia v...      | <a href="#">85.4</a> | 2e-15 | <b>UG</b> |
| <input checked="" type="checkbox"/> | 195489141 | <a href="#">ref XP_002092612.1</a> | GE14288 [Drosophila yakuba] >gb EDW92324....      | <a href="#">85.0</a> | 2e-15 | <b>G</b>  |
| <input checked="" type="checkbox"/> | 195347078 | <a href="#">ref XP_002040081.1</a> | GM16010 [Drosophila sechellia] >gb EDW569...      | <a href="#">84.6</a> | 3e-15 | <b>G</b>  |
| <input checked="" type="checkbox"/> | 226342894 | <a href="#">ref NP_001139709.1</a> | Bm122 protein [Bombyx mori] >gb ACN81326....      | <a href="#">84.2</a> | 4e-15 | <b>UG</b> |
| <input checked="" type="checkbox"/> | 158288659 | <a href="#">ref XP_001237263.2</a> | AGAP000570-PA [Anopheles gambiae str. PES...      | <a href="#">82.7</a> | 1e-14 | <b>UG</b> |
| <input checked="" type="checkbox"/> | 156540630 | <a href="#">ref XP_001599581.1</a> | PREDICTED: hypothetical protein [Nasonia ...      | <a href="#">82.7</a> | 1e-14 | <b>UG</b> |
| <input checked="" type="checkbox"/> | 195489090 | <a href="#">ref XP_002092590.1</a> | GE11581 [Drosophila yakuba] >gb EDW92302....      | <a href="#">82.7</a> | 1e-14 | <b>G</b>  |
| <input checked="" type="checkbox"/> | 189233613 | <a href="#">ref XP_001811691.1</a> | PREDICTED: similar to conserved hypotheti...      | <a href="#">82.3</a> | 2e-14 | <b>G</b>  |
| <input checked="" type="checkbox"/> | 189236015 | <a href="#">ref XP_001807284.1</a> | PREDICTED: similar to 11.6 kDa midgut pro...      | <a href="#">81.1</a> | 3e-14 | <b>UG</b> |
| <input checked="" type="checkbox"/> | 194755056 | <a href="#">ref XP_001959808.1</a> | GF13054 [Drosophila ananassae] >gb EDV366...      | <a href="#">80.4</a> | 5e-14 | <b>G</b>  |
| <input checked="" type="checkbox"/> | 157111220 | <a href="#">ref XP_001651441.1</a> | hypothetical protein AaeL_AAE005789 [Aed...       | <a href="#">78.8</a> | 2e-13 | <b>UG</b> |
| <input checked="" type="checkbox"/> | 195440326 | <a href="#">ref XP_002067993.1</a> | GK10923 [Drosophila willistoni] >gb EDW78...      | <a href="#">78.8</a> | 2e-13 | <b>G</b>  |
| <input checked="" type="checkbox"/> | 218505759 | <a href="#">ref NP_001136225.1</a> | hypothetical protein LOC100216500 [Bombyx...      | <a href="#">76.5</a> | 8e-13 | <b>UG</b> |
| <input checked="" type="checkbox"/> | 194880143 | <a href="#">ref XP_001974374.1</a> | GG21120 [Drosophila erecta] >gb EDV54774....      | <a href="#">76.1</a> | 1e-12 | <b>G</b>  |
| <input checked="" type="checkbox"/> | 270004645 | <a href="#">gb EFA01093.1</a>      | hypothetical protein TcasGA2_TC004016 [Triboli... | <a href="#">75.7</a> | 2e-12 |           |
| <input checked="" type="checkbox"/> | 195455264 | <a href="#">ref XP_002074639.1</a> | GK23181 [Drosophila willistoni] >gb EDW85...      | <a href="#">75.3</a> | 2e-12 | <b>G</b>  |
| <input checked="" type="checkbox"/> | 195384233 | <a href="#">ref XP_002050822.1</a> | GJ22362 [Drosophila virilis] >gb EDW62015...      | <a href="#">75.0</a> | 2e-12 | <b>G</b>  |
| <input checked="" type="checkbox"/> | 194890484 | <a href="#">ref XP_001977319.1</a> | GG18315 [Drosophila erecta] >gb EDV46246....      | <a href="#">75.0</a> | 3e-12 | <b>G</b>  |

>  [gb|ABI20163.1](#) 14.5 kDa salivary protein [Phlebotomus duboscqi]  
Length=153

Score = 128 bits (321), Expect = 3e-28, Method: Composition-based stats.  
Identities = 136/136 (100%), Positives = 136/136 (100%), Gaps = 0/136 (0%)

```

Query 1  TAPDPETVSAKITLVEDVDFVRANPGVTLTKLDNVRTARAIHNSLGQRVSGDRLVARNQ 60
          TAPDPETVSAKITLVEDVDFVRANPGVTLTKLDNVRTARAIHNSLGQRVSGDRLVARNQ
Sbjct 18  TAPDPETVSAKITLVEDVDFVRANPGVTLTKLDNVRTARAIHNSLGQRVSGDRLVARNQ 77

Query 61  DSASWGS LQNVQLTVNYPANGGYGAVVSVSILVDQTSNLGNGYVLYGGIGQRQIGILIE 120
          DSASWGS LQNVQLTVNYPANGGYGAVVSVSILVDQTSNLGNGYVLYGGIGQRQIGILIE
Sbjct 78  DSASWGS LQNVQLTVNYPANGGYGAVVSVSILVDQTSNLGNGYVLYGGIGQRQIGILIE 137

Query 121 ARNTYTF SYIAE IYGL 136
          ARNTYTF SYIAE IYGL
Sbjct 138 ARNTYTF SYIAE IYGL 153

```

>  [gb|ACF72876.1](#) unknown [Ochlerotatus taeniorhynchus]  
Length=117

Score = 126 bits (317), Expect = 6e-28, Method: Composition-based stats.  
Identities = 28/115 (24%), Positives = 47/115 (40%), Gaps = 1/115 (0%)

```

Query 22  VRANPGVTLTKLDNVRTARAIHNSLGQRVSGDRLVARNQDSASWGS LQNVQLTVNYPANG 81
          L + +++ + G + D L+ R S LQ + + YP G
Sbjct 2  KSLVLA AVLVSFGALVLSQSHNYFWGYPYDVLNRTFAIKSSSILQVKTMDLIYPLKG 61

Query 82  GYGAVVSVSILVDQTSNLGN-GYVLYGGIGQRQIGILIEARNTYTF SYIAE IYG 135
          G +S ++I + G +L GGIG I ++++ FS+I EIYG
Sbjct 62  QLGRNISAINITDQYINGKGGYASLLAGGIGYNHTKIHLKSQRNGFSFIVEIYG 116

```

>  [ref|XP\\_001850045.1](#) **UG** conserved hypothetical protein [Culex quinquefasciatus]

[gb|EDS31353.1|](#) **G** conserved hypothetical protein [Culex quinquefasciatus]  
Length=117

[GENE ID: 6040690 CpipJ\\_CPIJ008016](#) | hypothetical protein  
[Culex quinquefasciatus]

Score = 126 bits (317), Expect = 8e-28, Method: Composition-based stats.  
Identities = 29/115 (25%), Positives = 49/115 (42%), Gaps = 1/115 (0%)

```
Query 22 VRANPGVTLTKLDNVRTARAIHNSLGQRVSGDRLVARNQDSASWGS LQNVQLTVNYPANG 81
          V L L + ++ H G R D L+ R S LQ ++ YP G
Sbjct 2 KTLALTIVVLFSLGALVFTQSHHYQWGFGRGPYDVLNRTIAIKSSSILQVKTMDLYYPLKG 61

Query 82 GYGAVVSYVSI LVDQTSNLGN-GYVLYGGIGQRQIGILIEARNTYTF SYIAE IYG 135
          G +++++ + G +L GG+G I ++++ FS+I EIYG
Sbjct 62 QLGRNITFMNVTDQYINGKGGYASLLAGGVGFNNTKIHLKSRGNGFSFIVEIYG 116
```

> [ref|XP\\_001650838.1|](#) **UG** hypothetical protein AaeL\_AAEL005428 [Aedes aegypti]

[gb|EAT43100.1|](#) **G** conserved hypothetical protein [Aedes aegypti]  
Length=117

[GENE ID: 5566457 AaeL\\_AAEL005428](#) | hypothetical protein [Aedes aegypti]  
(10 or fewer PubMed links)

Score = 126 bits (316), Expect = 9e-28, Method: Composition-based stats.  
Identities = 28/115 (24%), Positives = 48/115 (41%), Gaps = 1/115 (0%)

```
Query 22 VRANPGVTLTKLDNVRTARAIHNSLGQRVSGDRLVARNQDSASWGS LQNVQLTVNYPANG 81
          + L + +++ + G + D L+ R S LQ ++ YP G
Sbjct 2 KTIVFALILVFSFGALVISQSHNYFWGYKGPYDVLNRTFAIKSSSILQVKTMDLYYPLKG 61

Query 82 GYGAVVSYVSI LVDQTSNLGN-GYVLYGGIGQRQIGILIEARNTYTF SYIAE IYG 135
          G +S ++I + G +L GGIG I ++++ FS+I EIYG
Sbjct 62 QLGRNISAINITDQYINGKGGYASLLAGGIGYNHTTIHLKSRGNGFSFIVEIYG 116
```

> [ref|XP\\_002101617.1|](#) GE15521 [Drosophila yakuba]

[gb|EDX02725.1|](#) **G** GE15521 [Drosophila yakuba]  
Length=157

[GENE ID: 6525796 Dyak\GE15521](#) | GE15521 gene product from transcript GE15521-RA  
[Drosophila yakuba] (10 or fewer PubMed links)

Score = 125 bits (315), Expect = 1e-27, Method: Composition-based stats.  
Identities = 41/128 (32%), Positives = 70/128 (54%), Gaps = 1/128 (0%)

```
Query 9 SAKITLVEDVDEFVRANPGVTLTKLDNVRTARAI-HNSLGQRVSGDRLVARNQDSASWGS 67
          IT V D + NP LT+++ V+ ++ + G R SGDRL+ + D S+ S
Sbjct 29 YTDITPVTDDTRYTSLNPDQTLEMTMNVKVKHSGKNIVFTAGDRASGDRLIVNHYDGESEFPS 88

Query 68 LQNVQLTVNYPANGGYGAVVSYVSI LVDQTSNLGNVLYGGIGQRQIGILIEARNTYTF 127
          ++V++ ++YPA G ++ + + VD +++ GY+ GGIGQ + IL+ + T +F
Sbjct 89 AKDVEVLMSSYPAGASTGVTLTSIEVYVDMSSADDAGGYLTGKGGIGQTNVEILLTSTNTRSF 148

Query 128 SYIAE IYG 135
          Y IYG
Sbjct 149 VYETFIYG 156
```

> [ref|XP\\_002039288.1|](#) **G** GM22809 [Drosophila sechellia]

[ref|XP\\_002107314.1|](#) **G** GD15632 [Drosophila simulans]

[gb|EDW56030.1|](#) **G** GM22809 [Drosophila sechellia]

[gb|EDX18296.1|](#) **G** GD15632 [Drosophila simulans]

Length=156

[GENE ID: 6614870 Dsec\GM22809](#) | GM22809 gene product from transcript GM22809-RA  
[Drosophila sechellia] (10 or fewer PubMed links)

Score = 125 bits (314), Expect = 2e-27, Method: Composition-based stats.  
Identities = 40/128 (31%), Positives = 70/128 (54%), Gaps = 1/128 (0%)

```
Query 9 SAKITLVEDVDEFVRANPGVTLTKLDNVRTARAI-HNSLGQRVSGDRLVARNQDSASWGS 67
          IT V D + NP LT+++ V+ ++ + G+R SGDRL+ + D ++ S
Sbjct 28 YTDITPVTDETRYTTLNPDQTLEMTMNVKVKHSGKNIVFTAGERASGDRLIVNHYDDENFPS 87
```



Query 68 LQNVQLTVNYPANGGYGAVVSYVSI LVDQTSNLGNGYVLYGGIGQRQIGILIEARNTYTF 127  
++V++ ++YPA G ++ + + VD ++ GY+ GGIGQ + IL+ + T +F  
Sbjct 88 AKDVEVLMSPAGASTGVTLTSLIEVYVDMADDAGGYLTKGGIGQTNVEILLTSNQTRSF 147

Query 128 SYIAE IYG 135  
Y IYG  
Sbjct 148 VYETFIYG 155

> [ref|NP\\_573299.1|](#) CG15044 [Drosophila melanogaster]  
[gb|AAL48888.1|](#) RE30049p [Drosophila melanogaster]  
[gb|AAF48849.2|](#) CG15044 [Drosophila melanogaster]  
[gb|ACL86723.1|](#) CG15044-PA [synthetic construct]  
[gb|ACL91333.1|](#) CG15044-PA [synthetic construct]  
Length=160

[GENE ID: 32834 CG15044](#) | CG15044 gene product from transcript CG15044-RA [Drosophila melanogaster] (10 or fewer PubMed links)

Score = 125 bits (313), Expect = 2e-27, Method: Composition-based stats.  
Identities = 41/128 (32%), Positives = 70/128 (54%), Gaps = 1/128 (0%)

Query 9 SAKITLVEDVDFVRANPGVTLTKLDNVRTARAIH-NSLGQRVSGDRLVARNQDSASWGS 67  
IT V D + NP L +++ V+ ++ + G+R SGDRL+ + D S+ S  
Sbjct 32 YTDITPVTDETRYTTLPDAQLNEMNKVKHSGNVVFTAGKRASGDRLIVNHYDDDSFPS 91

Query 68 LQNVQLTVNYPANGGYGAVVSYVSI LVDQTSNLGNGYVLYGGIGQRQIGILIEARNTYTF 127  
++V++ ++YPA G ++ + + VD T++ GY+ GGIGQ + IL+ + T +F  
Sbjct 92 AKDVEVLMSPAGASTGVTLTSLIEVYVDMTADDAGGYLTKGGIGQTNVEILLTSNQTRSF 151

Query 128 SYIAE IYG 135  
Y IYG  
Sbjct 152 VYETFIYG 159

> [gb|ABV44740.1|](#) 13.6 kDa midgut protein [Phlebotomus papatasi]  
Length=120

Score = 122 bits (306), Expect = 1e-26, Method: Composition-based stats.  
Identities = 25/120 (20%), Positives = 45/120 (37%), Gaps = 6/120 (5%)

Query 20 EFVRANPGVTLTKLDNVRTARAIHNSLGQRVSGDRLVARNQDSASWGS LQNVQLTVNYP 79  
+F A V L V A++ + G D+L+ R S +Q ++P  
Sbjct 2 KFVAFAF--VVLVAFCGVLYAQSHNMQWGNTHYDQLLHRAFVKKSSSFMQTKTTEYSWPN 59

Query 80 NGG---YGAVVSYVSI LVDQTSNLGN-GYVLYGGIGQRQIGILIEARNTYTF SYIAE IYG 135  
++ + L + G + GG+G I +++ + F +I EIYG  
Sbjct 60 ATNSQPRNRTITCIRALDQYVNGKGGYATLRAGGVGFNHTTIRFKSQRGHGFDFILEIYG 119

> [gb|ABV60331.1|](#) 11.6 kDa midgut protein [Lutzomyia longipalpis]  
Length=121

Score = 121 bits (305), Expect = 2e-26, Method: Composition-based stats.  
Identities = 25/114 (21%), Positives = 46/114 (40%), Gaps = 5/114 (4%)

Query 27 GVTLTCLDNVRTARAIHNSLGQRVSGDRLVARNQDSASWGS LQNVQLTVNYPANGG---- 82  
+ L V A++ + G + DRL+ R S +Q V VN+P  
Sbjct 7 LIVLAVFCGVLYAQSHNIQWGNQTHYDRLLLHREFVHKSSKWMQVVTHEVNWPNRQTAAQA 66

Query 83 YGAVVSYVSI LVDQTSNLGN-GYVLYGGIGQRQIGILIEARNTYTF SYIAE IYG 135  
A ++Y+ + + G + GG+G + +++ + +I EIYG  
Sbjct 67 RNATITYIRAMDQYVNGKGGYATLRAGGVGFNHTTEVRFKSRSQGIDFILEIYG 120

> [ref|NP\\_001033959.1|](#) CG33998 [Drosophila melanogaster]  
[tpg|DAA02612.1|](#) TPA\_inf: HDC07203 [Drosophila melanogaster]  
[gb|ABC66050.1|](#) CG33998 [Drosophila melanogaster]  
Length=119

[GENE ID: 3885594 CG33998](#) | CG33998 gene product from transcript CG33998-RA [Drosophila melanogaster] (10 or fewer PubMed links)

Score = 121 bits (305), Expect = 2e-26, Method: Composition-based stats.



Identities = 20/120 (16%), Positives = 39/120 (32%), Gaps = 2/120 (1%)

```
Query 18  VDEFVRANPGVTLTKLDNVRTARAIHNSLGQRVSGDRLVARNQDSASWGS LQNVQLTVNY 77
+ +V          R+ + G R D + R + L+ V +
Sbjct 1    MKIYVILLVFALTAFAAASGRGRSHSITWGARTYRDMHLHREIITEKSKFLRVVTRFVVF 60

Query 78  PANGGYGAVVS YVSILVDQTSNLGN-GYVLYGGIGQRQIGILIEARNTYTF SYIAE IYGL 136
++ + I          G Y+ GG I +++++ FS+I +IYG+
Sbjct 61  DQK-KLARTITQIVITDQIRDGNGGYAYLTAGGPQTTYAKIHLKSQRNQGFSFIIDIYGV 119
```

> [ref|XP\\_001961218.1](#)  GF11112 [Drosophila ananassae]

[gb|EDV38040.1](#)  GF11112 [Drosophila ananassae]  
Length=120

[GENE ID: 6493977 Dana\GF11112](#) | GF11112 gene product from transcript GF11112-RA [Drosophila ananassae] (10 or fewer PubMed links)

Score = 121 bits (304), Expect = 3e-26, Method: Composition-based stats.  
Identities = 20/120 (16%), Positives = 41/120 (34%), Gaps = 1/120 (0%)

```
Query 18  VDEFVRANPGVTLTKLDNVRTARAIHNSLGQRVSGDRLVARNQDSASWGS LQNVQLTVNY 77
+ ++ + + + + + G R D V R + L+ V +
Sbjct 1    MKFWIVLSVSVSLAAFVKAEGRGPSSVTVGARA FRDMHVREIITEKSKFLRVVTRDFVVF 60

Query 78  PANGGYGAVVS YVSILVDQTSNLGN-GYVLYGGIGQRQIGILIEARNTYTF SYIAE IYGL 136
N ++ + I          LG Y+ GG + I +++ FS+I +IY +
Sbjct 61  TQNPKLARTITQIVITDQVREGLGGYAYLTGGGPQSDVFKIHFKSQRNKGFSFIVDIYAI 120
```

> [ref|XP\\_002026810.1](#)  GL27028 [Drosophila persimilis]

[gb|EDW33792.1](#)  GL27028 [Drosophila persimilis]  
Length=166

[GENE ID: 6601775 Dper\GL27028](#) | GL27028 gene product from transcript GL27028-RA [Drosophila persimilis] (10 or fewer PubMed links)

Score = 121 bits (303), Expect = 3e-26, Method: Composition-based stats.  
Identities = 50/138 (36%), Positives = 80/138 (57%), Gaps = 6/138 (4%)

```
Query 3    PDPETVSAKITLVEDVDEFVRANPGVTLTKLDNVRTA-----RAIHNSLGQRVSGDRLVA 57
P + +IT+V+++V F +PG+ + +L          ++ +LG RV+ D LVA
Sbjct 28   PLDSSTLREITVVKNVRLFAAQHPGLKIQRLAKQPATARGGVESVRYTLGARVTSDSLVA 87

Query 58   RNQDSASWGS LQNVQLTVNYPANGGYGAVVS YVSILVDQTSNLGNGYVLYGGIGQRQIGI 117
+ D S+ + Q+V + + YP G GA+++YV ++ Q ++ GN YV+ GGIGQR I I
Sbjct 88   QGADVFSYPASQDVS VQLTYPEEGA-GAIITYVELICTQDNSEGNAYVVAGGIGQRFISI 146

Query 118  LIEARNTYTF SYIAE IYG 135
++EA T FSY A+ YG
Sbjct 147  ILEASQTRNFSYQAQYYG 164
```

> [ref|XP\\_002059070.1](#)  GJ15191 [Drosophila virilis]

[gb|EDW58139.1](#)  GJ15191 [Drosophila virilis]  
Length=162

[GENE ID: 6635434 Dvir\GJ15191](#) | GJ15191 gene product from transcript GJ15191-RA [Drosophila virilis] (10 or fewer PubMed links)

Score = 120 bits (302), Expect = 3e-26, Method: Composition-based stats.  
Identities = 48/135 (35%), Positives = 85/135 (62%), Gaps = 5/135 (3%)

```
Query 5    PETVSAKITLVEDVDEFVRANPGVTLTKLDNV----RTARAIHNSLGQRVSGDRLVARNQ 60
+ I +V+++V +F +PG+ + +L+          + +++ +LG RVSGDRLVA+
Sbjct 27   DADIHRDIVVVKNVRFDAFAQHPGLKMQRLEKQPAVRASGQSVRYTLGARVSGDRLVAQGA 86

Query 61   DSASWGS LQNVQLTVNYPANGGYGAVVS YVSILVDQTSNLGNGYVLYGGIGQRQIGILIE 120
D S+ + ++V L + YP +G G+++V++V ++ Q ++ GN YV+ GGIGQR I I+++
Sbjct 87   DVYSYPARKDVS LQLTYPESGA-GSIVTFVELICTQDNSEGNAYVVAGGIGQRFISIVVE 145

Query 121  ARNTYTF SYIAE IYG 135
A+ T F+Y A+ +G
Sbjct 146  AKQTFENFAYQAQYFG 160
```

> [ref|XP\\_002015909.1](#) **G** GL10767 [Drosophila persimilis]

[gb|EDW31799.1](#) **G** GL10767 [Drosophila persimilis]

Length=120

[GENE ID: 6591185 Dper\GL10767](#) | GL10767 gene product from transcript GL10767-RA [Drosophila persimilis] (10 or fewer PubMed links)

Score = 120 bits (302), Expect = 4e-26, Method: Composition-based stats.  
Identities = 20/120 (16%), Positives = 40/120 (33%), Gaps = 1/120 (0%)

```
Query 18 VDEFVRANPGVTLTKLDNVRTARAIHNSLGQRVSGDRLVARNQDSASWGS LQNVLTVNY 77
+ ++ + + G R D + R + + L+ V + +
Sbjct 1 MRVYIFLVIISVTALCQAAGRPSHSVTVGSRFRDMHLRRDIITEKSSFLRVVTRDLIF 60

Query 78 PANGGYGAVVSYSILVDQTSNLGN-GYVLYGGIGQRQIGILIEARNTYTF SYIAE IYGL 136
N ++ + I G Y+ GG I +++ FS+I +IYGL
Sbjct 61 KQNPKLARTITQIVITDQVRDGGYAYLQAGGPQTTYAKIHFKSQRNKGF SFIVDIYGL 120
```

> [ref|XP\\_001974726.1](#) **G** GG21920 [Drosophila erecta]

[gb|EDV55126.1](#) **G** GG21920 [Drosophila erecta]

Length=119

[GENE ID: 6547300 Dere\GG21920](#) | GG21920 gene product from transcript GG21920-RA [Drosophila erecta] (10 or fewer PubMed links)

Score = 120 bits (302), Expect = 4e-26, Method: Composition-based stats.  
Identities = 24/119 (20%), Positives = 45/119 (37%), Gaps = 3/119 (2%)

```
Query 20 EFVRANPGVTLTKL-DNVRTARAIHNSLGQRVSGDRLVARNQDSASWGS LQNVLTVNYP 78
+F V+L+ L + R+ + G R D L+ R + L+ V +
Sbjct 2 KFSVILLVVSLSALSSEASGRGRSHSITWGARISYRDMLLRREIITEKSKFLRVVTKDYEFD 61

Query 79 ANG GYGAVVSYSILVDQTSNLGN-GYVLYGGIGQRQIGILIEARNTYTF SYIAE IYGL 136
++ + I G Y+ GG I +++ FS+I +IYG+
Sbjct 62 QK-KLARTITQIVITDQIRDGNGGYAYLTAGGPQTTYAKIHLKSQRNQGF SFIIDIYGI 119
```

> [gb|ACI30042.1](#) hypothetical secreted protein [Anopheles darlingi]

Length=119

Score = 120 bits (302), Expect = 4e-26, Method: Composition-based stats.  
Identities = 23/117 (19%), Positives = 46/117 (39%), Gaps = 1/117 (0%)

```
Query 20 EFVRANPGVTLTKLDNVRTARAIHNSLGQRVSGDRLVARNQDSASWGS LQNVLTVNYP 79
+ + + A+ + G R+ D L + S L+ L ++YP+
Sbjct 2 KITICFTVLAVLGFSCLAVAQTHNYFFGARIPYDSLANTQTTVIQSGSFLRVKSLNIDYPS 61

Query 80 NGGYGAVVSYSILVDQTSNLGN-GYVLYGGIGQRQIGILIEARNTYTF SYIAE IYG 135
G G ++ + + G + GGIGQ I +++ ++ EIYG
Sbjct 62 KGQRGRNITAIYVYDRLGGGRGGYASITRGGIGQNFTRINLKSQRNGMNFQVEIYG 118
```

> [ref|XP\\_002071202.1](#) **G** GK25257 [Drosophila willistoni]

[gb|EDW82188.1](#) **G** GK25257 [Drosophila willistoni]

Length=169

[GENE ID: 6648809 Dwil\GK25257](#) | GK25257 gene product from transcript GK25257-RA [Drosophila willistoni] (10 or fewer PubMed links)

Score = 120 bits (301), Expect = 5e-26, Method: Composition-based stats.  
Identities = 57/132 (43%), Positives = 82/132 (62%), Gaps = 5/132 (3%)

```
Query 8 VSAKITLVEDVDEFVRANPGVTLTKLDNVRTA----RAIHNSLGQRVSGDRLVARNQDSA 63
IT+V+DV F +PG+ + +L A +++ SLG R+SGDRLVA+ D
Sbjct 37 SLRDITVVKDVRFAAFAAKHPGLKMQRLTKHPEARSSTQSVRYSLGARISGDRLVAQGADV F 96

Query 64 SWGS LQNVLTVNYPANGGYGAVVSYSILVDQTSNLGN YVLYGGIGQRQIGILIEARN 123
S+ S+++V L + YP +G GAVV+YV ++ Q + GN YV+ GGIGQR I I++EA
Sbjct 97 SYPSVKDVS LQ LTYPEPSG-TGAVVTYVELICSQDNTEGNAYVVAGGIGQR F I SIVLEANQ 155

Query 124 TYTFSYIAE IYG 135
T FSY A+ YG
Sbjct 156 TKNFSYQAQYYG 167
```

> [ref|XP\\_002048773.1|](#) **G** GJ21142 [Drosophila virilis]

[gb|EDW59966.1|](#) **G** GJ21142 [Drosophila virilis]

Length=116

**GENE ID: 6626260 Dvir\GJ21142** | GJ21142 gene product from transcript GJ21142-RA [Drosophila virilis] (10 or fewer PubMed links)

Score = 119 bits (299), Expect = 8e-26, Method: Composition-based stats.  
Identities = 20/115 (17%), Positives = 49/115 (42%), Gaps = 2/115 (1%)

```
Query 23 RANPGVTLTKLDNVRTARAIHNSLGQRVSGDRLVARNQDSASWGS LQNVQLTVNYPANGG 82
          + L ++A + G+R S D L++R + + + V++P +G
Sbjct 1 MKFLYSCVLLALCAASQAYSATWGKRNSTDYLLSRQTEVRAPLKNSYWNINVDFFRSGT 60

Query 83 YG-AVVSYSILVDQTSNLG-NGYVLYGGIGQRQIGILIEARNITYTFSYIAEIIYG 135
          ++ ++++ + ++ G + GG G R I + + + + + EI+G
Sbjct 61 SNLYTTAINVIDNFRNSSGATPSLWSGGPGYRFAQINLRSQVSKGLNSTVEIWG 115
```

> [ref|XP\\_001354364.2|](#) **G** GA13455 [Drosophila pseudoobscura pseudoobscura]

[gb|EAL31417.2|](#) GA13455 [Drosophila pseudoobscura pseudoobscura]

Length=166

**GENE ID: 4814282 Dpse\GA13455** | GA13455 gene product from transcript GA13455-RA [Drosophila pseudoobscura pseudoobscura] (10 or fewer PubMed links)

Score = 119 bits (299), Expect = 9e-26, Method: Composition-based stats.  
Identities = 51/138 (36%), Positives = 80/138 (57%), Gaps = 6/138 (4%)

```
Query 3 PDPETVSAKITLVEDVDEFVRANPGVTLTKLDNVRTA-----RAIHNSLGQRVSGDRLVA 57
          P + +IT+V++V F +PG+ + +L ++ +LG RV+ D LVA
Sbjct 28 PLDSSTLREITVVKVNRVLFQHPGLKIQRLAKQPATARGGVESVRYTLGARVTSDSLVA 87

Query 58 RNQDSASWGS LQNVQLTVNYPANGGYGAVVSYSILVDQTSNLGNGYVLYGGIGQRQIGI 117
          + D S+ + Q+V + + YP G GA+V+YV ++ Q ++ GN YV+ GGIGQR I I
Sbjct 88 QGADVFSYPASQDVSVQLTYPEEGA-GAIVTYVELICTQDNSEGNAVYVAGGIGQRFISI 146

Query 118 LIEARNITYTFSYIAEIIYG 135
          ++EA T FSY A+ YG
Sbjct 147 ILEASQTRNFSYQAQYYG 164
```

> [ref|XP\\_001230950.2|](#) **UG** AGAP003713-PA [Anopheles gambiae str. PEST]

[gb|EAU76936.2|](#) **G** AGAP003713-PA [Anopheles gambiae str. PEST]

Length=119

**GENE ID: 4577451 AgaP\_AGAP003713** | AGAP003713-PA [Anopheles gambiae str. PEST] (10 or fewer PubMed links)

Score = 118 bits (297), Expect = 2e-25, Method: Composition-based stats.  
Identities = 25/113 (22%), Positives = 49/113 (43%), Gaps = 1/113 (0%)

```
Query 24 ANPGVTLTKLDNVRTARAIHNSLGQRVSGDRLVARNQDSASWGS LQNVQLTVNYPANGGY 83
          + + +++ + G R D L+ R S LQ + + YP G
Sbjct 6 LAVVAAVLLFACLVASQSNNYFWGVRDPRDVLNRTI AVRSGTILQVKSIDL VYPLKGQV 65

Query 84 GAVVSYSILVDQTSNLGN-GYVLYGGIGQRQIGILIEARNITYTFSYIAEIIYG 135
          G +S +S++ T+ G + GGIG + ++++ + +++I EIIYG
Sbjct 66 GRNISAI SVVDQYTINGKGGYASLYAGGIGYNYTTVHLKSRGHGYNFIVEIYG 118
```

> [ref|XP\\_001977671.1|](#) **G** GG18116 [Drosophila erecta]

[gb|EDV46598.1|](#) **G** GG18116 [Drosophila erecta]

Length=156

**GENE ID: 6550161 Dere\GG18116** | GG18116 gene product from transcript GG18116-RA [Drosophila erecta] (10 or fewer PubMed links)

Score = 118 bits (297), Expect = 2e-25, Method: Composition-based stats.  
Identities = 39/128 (30%), Positives = 69/128 (53%), Gaps = 1/128 (0%)

```
Query 9 SAKITLVEDVDEFVRANPGVTLTKLDNVRTARAI-HNSLGQRVSGDRLVARNQDSASWGS 67
          IT V D + NP + L +++ V+ ++ + G+R SGDR++ + D S S
Sbjct 28 YTDITPVTDetryTTLPDIQLNEMNKVKHSGKNIVFTAGERASGDRMIVNHFDGDSLTS 87

Query 68 LQNVQLTVNYPANGGYGAVVSYSILVDQTSNLGNGYVLYGGIGQRQIGILIEARNITYTF 127
```

Sbjct 88 ++V++ ++YPA G ++ + + VD ++ GY+ GGIGQ + IL+ + T +F  
AKDVEVLSYPAGASTGVTLTTSIEVYVDMADDAGGYLTKGGIGQTHVEILLTNSLTRSF 147

Query 128 SYIAEIIYG 135  
Y IYG

Sbjct 148 VYETFIYG 155

> [ref|XP\\_001354363.1|](#)  GA13456 [Drosophila pseudoobscura pseudoobscura]  
[ref|XP\\_002026811.1|](#)  GL27029 [Drosophila persimilis]  
[gb|EAL31416.1|](#)  GA13456 [Drosophila pseudoobscura pseudoobscura]  
[gb|EDW33793.1|](#)  GL27029 [Drosophila persimilis]  
Length=157

GENE ID: [4814310 Dpse\GA13456](#) | GA13456 gene product from transcript GA13456-RA [Drosophila pseudoobscura pseudoobscura] (10 or fewer PubMed links)

Score = 118 bits (295), Expect = 2e-25, Method: Composition-based stats.  
Identities = 40/128 (31%), Positives = 70/128 (54%), Gaps = 1/128 (0%)

Query 9 SAKITLVEDVDEFVRANPGVTLTKLDNVRTARAI-HNSLGQRVSGDRLVARNQDSASWGS 67  
+ I+ V D F P V L++++ V+ ++ + G+R+SGDRLV + D S+ +

Sbjct 29 YSDISPVTDDKRFTHLYPEVELSEMKNVKHSGKNIVFTSGERISGDRLVVNHYDDES FAT 88

Query 68 LQNVLTVNYPANGGYGAVVSYVSILVDQTSNLGNGYVLYGGIGQRQIGILIEARNYTF 127  
++++ + YPA G ++ + I VD T++ GY+ GGIG+ IL+ + T +F

Sbjct 89 AVDIEVLMRYPAESSTGVTLTTCIEIYVDTTASDAGGYLTRGGIGETIAEILLTNSGTRSF 148

Query 128 SYIAEIIYG 135  
Y IYG

Sbjct 149 VYETFIYG 156

> [ref|XP\\_002138284.1|](#)  GA24478 [Drosophila pseudoobscura pseudoobscura]  
[gb|EDY68842.1|](#)  GA24478 [Drosophila pseudoobscura pseudoobscura]  
Length=133

GENE ID: [6898218 Dpse\GA24478](#) | GA24478 gene product from transcript GA24478-RA [Drosophila pseudoobscura pseudoobscura] (10 or fewer PubMed links)

Score = 117 bits (293), Expect = 4e-25, Method: Composition-based stats.  
Identities = 21/133 (15%), Positives = 41/133 (30%), Gaps = 14/133 (10%)

Query 18 VDEFVRANPGVTLTKLDNVRTARAIHNSLGQRVSGDRLVARNQDSASWGS LQNVLTVNY 77  
+ ++ + + G R D + R+ + L+ V ++

Sbjct 1 MRVYIFLVLISVTALCQAAGRPSHSVWTGSRFRDMHLRRDIITEKSSFLRVVTRDLIF 60

Query 78 PANGG-----YGAVVSYVSILVDQTSNLGN-GYVLYGGIGQRQIGILIEARN 123  
NG ++ + I G Y+ GG I +++

Sbjct 61 KQNGSAQRLIATCCQKSKLARTITQIVITDQVRDGGYAYLQAGGPQTTYAKIHFKSQR 120

Query 124 TYTFSYIAEIIYGL 136  
FS+I +IYGL

Sbjct 121 NKGFSFIVDIYGL 133

> [gb|ACD81831.1|](#) IP21621p [Drosophila melanogaster]  
Length=112

Score = 116 bits (292), Expect = 6e-25, Method: Composition-based stats.  
Identities = 19/113 (16%), Positives = 36/113 (31%), Gaps = 2/113 (1%)

Query 25 NPGVTLTKLDNVRTARAIHNSLGQRVSGDRLVARNQDSASWGS LQNVLTVNYPANGGYG 84  
R+ + G R D + R + L+ V +

Sbjct 1 LVFALTAFAAAASGRGRSHSITWGARTYRDMHLHREIITEKSKFLRVVTRFVFDQK-KLA 59

Query 85 AVVSYVSILVDQTSNLGN-GYVLYGGIGQRQIGILIEARNYTFYIAEIIYGL 136  
++ + I G Y+ GG I +++ FS+I +IYG+

Sbjct 60 RTITQIVITDQIRDGNGGYAYLTAGGPQTTYAKIHLKSQRNQGFSFIIDIIYGV 112

> [ref|XP\\_002071201.1|](#)  GK25258 [Drosophila willistoni]  
[gb|EDW82187.1|](#)  GK25258 [Drosophila willistoni]  
Length=156

[GENE ID: 6648808 Dwil\GK25258](#) | GK25258 gene product from transcript GK25258-RA [Drosophila willistoni] (10 or fewer PubMed links)

Score = 116 bits (292), Expect = 6e-25, Method: Composition-based stats.  
Identities = 35/128 (27%), Positives = 67/128 (52%), Gaps = 1/128 (0%)

```
Query 9  SAKITLVEDVDEFVRANPGVTLTKLDNVRTARAI-HNSLGQRVSGDRLVARNQDSASWGS 67
          IT V D + NP L + + V+ ++ + G+R++GDRL+ + D S+ +
Sbjct 28  YTAITPVSDETRYTTLNPNAELKEFNKVKHSGKNIVFTSGERITGDRLIVNHYDDESFTT 87

Query 68  LQNVLTVNYPANGGYGAVVSYVSIILVDQTSNLGNGYVLYGGIGQRQIGILIEARNTYTF 127
          +++++ YP++ GA ++ + I VD +++ Y++ GGIG+ IL+ T T+
Sbjct 88  TADIEVGMKYPSSSSTGATLTCIEIYVDMASDAGAYMINGGIGKANAEIILLTCNQTRTY 147

Query 128 SYIAE IYG 135
          Y YG
Sbjct 148 VYETYFYG 155
```

> [ref|XP\\_001987728.1](#)  GH22082 [Drosophila grimshawi]

[gb|EDW02595.1](#)  GH22082 [Drosophila grimshawi]  
Length=121

[GENE ID: 6560811 Dgri\GH22082](#) | GH22082 gene product from transcript GH22082-RA [Drosophila grimshawi] (10 or fewer PubMed links)

Score = 116 bits (291), Expect = 8e-25, Method: Composition-based stats.  
Identities = 19/117 (16%), Positives = 44/117 (37%), Gaps = 2/117 (1%)

```
Query 21  FVRANPGVTLTKLDNVRTARAIHNSLGQRVSGDRLVARNQDSASWGS LQNVLTVNYPAN 80
          F + T ++ + G R+ D + R + L+ V ++
Sbjct 6  FTLLLVSLAAVSHSAGTNSHVAWGGRMFRDTHLERVITTEKSRFLRVVTRDYHFQOI 65

Query 81  GYGAVVSYVSIILVDQTSNLGN-GYVLYGGIGQRQIGILIEARNTYTF SYIAE IYGL 136
          G +++ + + G +++ GG + I +++ FS+I +IYG+
Sbjct 66  G-LQRRITQIVVTDQVRNNGGGYAHLVAGGPNSHFVKIHFKSQRNKGFSFIVDIYGI 121
```

> [ref|XP\\_002009841.1](#)  GI15587 [Drosophila mojavensis]

[gb|EDW07158.1](#)  GI15587 [Drosophila mojavensis]  
Length=164

[GENE ID: 6584185 Dmoj\GI15587](#) | GI15587 gene product from transcript GI15587-RA [Drosophila mojavensis] (10 or fewer PubMed links)

Score = 116 bits (290), Expect = 9e-25, Method: Composition-based stats.  
Identities = 50/137 (36%), Positives = 84/137 (61%), Gaps = 7/137 (5%)

```
Query 5  PETVSAKITLVEDVDEFVRANPGVTLTKLDNVRTAR-----AIHNSLGQRVSGDRLVAR 58
          V I +V++V +FV +PG+ L ++ AR ++ +LG R++GDRLVA+
Sbjct 27  DADVHRDIIVKKNRDFVAQHPLKLRMVKQPAARATTRSLSVRYTLGARINGDRLVAQ 86

Query 59  NQDSASWGS LQNVLTVNYPANGGYGAVVSYVSIILVDQTSNLGNGYVLYGGIGQRQIGIL 118
          D + + ++V L + YP +G G++V++V ++ Q +N GN YV+ GGIGQR I I+
Sbjct 87  GADVPHYQARKDVSLQITYPESGA-GSIVTFVELICTQDNNEGNAYVVAGGIGQRFISIV 145

Query 119 IEARNYTF SYIAE IYG 135
          +EA+ T F+Y A+ +G
Sbjct 146 LEAKQTDDFAYQAQYFG 162
```

> [ref|XP\\_002082142.1](#)  GD11406 [Drosophila simulans]

[gb|EDX07727.1](#)  GD11406 [Drosophila simulans]  
Length=119

[GENE ID: 6735167 Dsim\GD11406](#) | GD11406 gene product from transcript GD11406-RA [Drosophila simulans] (10 or fewer PubMed links)

Score = 116 bits (290), Expect = 1e-24, Method: Composition-based stats.  
Identities = 19/120 (15%), Positives = 39/120 (32%), Gaps = 2/120 (1%)

```
Query 18  VDEFVRANPGVTLTKLDNVRTARAIHNSLGQRVSGDRLVARNQDSASWGS LQNVLTVNY 77
          + V + R+ + G R D + R + L+ V +
Sbjct 1  MKISVILLVISLSAFVAASGRGRSHSITWGARSYRDMHLRREIITEKSKFLRVVTRDYVF 60

Query 78  PANGGYGAVVSYVSIILVDQTSNLGN-GYVLYGGIGQRQIGILIEARNTYTF SYIAE IYGL 136
```

++ + I G ++ GG I ++++ FS+I +IYG+  
Sbjct 61 DQK-KLARTITQIVITDQIRDGNGGYAFLTAGGPPQTTYAKIHLKSRNQGFSEFIIDYGI 119

> [ref|XP\\_002034496.1|](#)  GM21912 [Drosophila sechellia]  
[gb|EDW48509.1|](#)  GM21912 [Drosophila sechellia]  
Length=119

[GENE ID: 6609844 Dsec\GM21912](#) | GM21912 gene product from transcript GM21912-RA [Drosophila sechellia] (10 or fewer PubMed links)

Score = 115 bits (288), Expect = 2e-24, Method: Composition-based stats.  
Identities = 19/120 (15%), Positives = 38/120 (31%), Gaps = 2/120 (1%)

Query 18 VDEFVRANPGVTLTKLDNVRTARAIHNSLGQRVSGDRLVARNQDSASWGS LQNVQLTVNY 77  
+ V R+ + G R D + R + L+ V +  
Sbjct 1 MKISVILLVISLSAFAAASGRGRSHSITWGARSYRDMHLRREIITEKSKFLRVVTRDYVF 60  
Query 78 PANGGYGAVVSVYSILVDQTSNLGN-GYVLYGGIGQRQIGILIEARNTYTFYSYIAEYIGL 136  
++ + I G ++ GG I ++++ FS+I +IYG+  
Sbjct 61 DQK-KLARTITQIVITDQIRDGNGGYAFLTAGGPPQTTYAKIHLKSRNQGFSEFIIDYGI 119

> [ref|XP\\_001990970.1|](#)  GH12337 [Drosophila grimshawi]  
[gb|EDV99594.1|](#)  GH12337 [Drosophila grimshawi]  
Length=162

[GENE ID: 6564732 Dgri\GH12337](#) | GH12337 gene product from transcript GH12337-RA [Drosophila grimshawi] (10 or fewer PubMed links)

Score = 115 bits (288), Expect = 2e-24, Method: Composition-based stats.  
Identities = 49/133 (36%), Positives = 84/133 (63%), Gaps = 5/133 (3%)

Query 7 TVSAKITLVEDVDEFVRANPGVTLTKLDNVRTA----RAIHNSLGQRVSGDRLVARNQDS 62  
V +I +V++V +F +PG+ L +L +++ +LG RVSGDRLVA+ D  
Sbjct 29 DVQRQIVVVKNVRDFAAEHPGLKQLRLQKQPAGRMSGQSVRYTLGARVSGDRLVAQGADV 88  
Query 63 ASWGS LQNVQLTVNYPANGGYGAVVSVYSILVDQTSNLGNGYVLYGGIGQRQIGILIEAR 122  
S+ + ++V + + YP +G G++V++V ++ Q ++ GN YV+ GGIGQR I I++EA+  
Sbjct 89 FSYPAQKDVSVQLTYPEPGA-GSIVTFVELICTQDNSEGNAYVAVAGGIGQRFISIVVEAK 147  
Query 123 NTYTFYSYIAEYIG 135  
T +F Y A+ +G  
Sbjct 148 QTNSFGYQAQYFG 160

> [gb|ABV60298.1|](#) 14.3 kDa midgut protein [Lutzomyia longipalpis]  
Length=154

Score = 115 bits (288), Expect = 2e-24, Method: Composition-based stats.  
Identities = 82/136 (60%), Positives = 98/136 (72%), Gaps = 2/136 (1%)

Query 3 PDPETVSAKITLVEDVDEFVRANPGVTLTKLDN--VRTARAIHNSLGQRVSGDRLVARNQ 60  
D E VSAKI +V+ + +F ANP V L KLD+ VR + IH SLG RV+GDRLV ++  
Sbjct 19 SDAEDVSAKIRIVDSISDFKLANPDVQLMKLDSQSVRAGKTIHYSLGRRVAGDRLVGTSR 78  
Query 61 DSASWGS LQNVQLTVNYPANGGYGAVVSVYSILVDQTSNLGNGYVLYGGIGQRQIGILIE 120  
S SW QN+QL++NYP NGG G VV+YVSI V+QTSN G GYVL GGIGQR I I+IE  
Sbjct 79 GSHSWAFPQNIQLSLNYPTNGSGGVVTVYSIHVNQTSNQGRGYVLNGGIGQRFISIIIE 138  
Query 121 ARNTYTFYSYIAEYIGL 136  
A NT FSY AEIYG+  
Sbjct 139 ANNTLNFSYNAEYIGV 154

> [ref|XP\\_002009842.1|](#)  GI15588 [Drosophila mojavensis]  
[gb|EDW07159.1|](#)  GI15588 [Drosophila mojavensis]  
Length=170

[GENE ID: 6584186 Dmoj\GI15588](#) | GI15588 gene product from transcript GI15588-RA [Drosophila mojavensis] (10 or fewer PubMed links)

Score = 114 bits (285), Expect = 4e-24, Method: Composition-based stats.  
Identities = 47/142 (33%), Positives = 75/142 (52%), Gaps = 7/142 (4%)

Query 1 TAPDPET-----VSAKITLVEDVDEFVRANPGVTLTKLDNVRTARAI-HNSLGQRVSGD 53

+ PDP++ V I V D + + NP V LT L+ V+ A+ S G+R+SGD  
Sbjct 28 SPPDPQQRATDLVYTPIKPVTDENRYTTLNPDVKLTALNKVKHAKGSMVFSSGERISGD 87  
Query 54 RLVARNQDSASWGLQNVQLTVNYPANGGYGAVVSYSILVDQTSNLGNGYVLYGGIGQR 113  
+L+ N D S+ + +V++ ++Y + G ++ + I VD T++ + Y GGIG  
Sbjct 88 KLLVNNYDDESFTTAVDVEVMSYSSKTGSATTLTSIEIYVDTTADDASAYFTAGGIGSS 147  
Query 114 QIGILIEARNTYTFSYIAEIIYG 135  
+ IL+ T TFSY A YG  
Sbjct 148 EASILLACNQTRTFSYEAVFYG 169

> [ref|XP\\_001990969.1|](#)  GH12339 [Drosophila grimshawi]  
[gb|EDV99593.1|](#)  GH12339 [Drosophila grimshawi]  
Length=166

[GENE ID: 6564731 Dgri\GH12339](#) | GH12339 gene product from transcript GH12339-RA [Drosophila grimshawi] (10 or fewer PubMed links)

Score = 113 bits (282), Expect = 7e-24, Method: Composition-based stats.  
Identities = 42/128 (32%), Positives = 70/128 (54%), Gaps = 1/128 (0%)

Query 9 SAKITLVEDVDEFVRANPGVTLTKLDNVRTARAI-HNSLGQRVSGDRLVARNQDSASWGS 67  
+ I V + F NP V L L V+ A+ S G+R++GD+L+ N D S+ +  
Sbjct 38 YSPIQVTVNETRFTTLNPSVQLVPLKVKHAKGNIVFSAGERITGDKLLVNNYDDESFTT 97  
Query 68 LQNVQLTVNYPANGGYGAVVSYSILVDQTSNLGNGYVLYGGIGQRQIGILIEARNTYTF 127  
+V++ + YP++ G ++ + I VD +++ N Y + GGIG+ + IL++ T TF  
Sbjct 98 AVDVEVQMRYPSSSGISITLTSIEIYVDASADDANAYFIDGGIGKHKASILLDCNLTRTF 157  
Query 128 SYIAEIIYG 135  
SY A YG  
Sbjct 158 SYEAFYFG 165

> [ref|XP\\_002061455.1|](#)  GK20920 [Drosophila willistoni]  
[gb|EDW72441.1|](#)  GK20920 [Drosophila willistoni]  
Length=121

[GENE ID: 6638174 Dwil\GK20920](#) | GK20920 gene product from transcript GK20920-RA [Drosophila willistoni] (10 or fewer PubMed links)

Score = 112 bits (281), Expect = 9e-24, Method: Composition-based stats.  
Identities = 19/115 (16%), Positives = 41/115 (35%), Gaps = 3/115 (2%)

Query 22 VRANPGVTLTKLDNVRTARAIHNSLGQRVSGDRLVARNQDSASWGLQNVQLTVNYPANG 81  
+ T + V + + G R D L++R + L+ V +  
Sbjct 8 LVLAIVSVATFCEGVGRGGSNSVTVGARKYRDTLLSREIITVKSRFLRVVTHDYVFRQK- 66  
Query 82 GYGAVVSYSILVDQTSNLGN-GYVLYGGIGQRQIGILIEARNTYTFSYIAEIIYG 135  
+ ++ + + + G ++ GG I +++ FS+I +IYG  
Sbjct 67 -WPRTITQIVVTDQIRNGEGGYATLVGGGPMATYAKIHFKSQRNNGFSFIVDIYG 120

> [ref|XP\\_002101618.1|](#)  GE15520 [Drosophila yakuba]  
[gb|EDX02726.1|](#)  GE15520 [Drosophila yakuba]  
Length=164

[GENE ID: 6525797 Dyak\GE15520](#) | GE15520 gene product from transcript GE15520-RA [Drosophila yakuba] (10 or fewer PubMed links)

Score = 112 bits (281), Expect = 1e-23, Method: Composition-based stats.  
Identities = 50/135 (37%), Positives = 76/135 (56%), Gaps = 7/135 (5%)

Query 9 SAKITLVEDVDEFVRANPGVTLTKLDNVRT-----ARAIHNSLGQRVSGDRLVARNQD 61  
S I +V D+ F +PG+ + ++ ++ + ++G R+ GD LVA+ D  
Sbjct 29 STGIRVVNDIHFVFAAQHPGLQIQPMEKEIVPGKARVGSQTVRYNMGARIPGDALVAQTAD 88  
Query 62 SASWGLQNVQLTVNYPANGGYGAVVSYSILVDQTSNLGNGYVLYGGIGQRQIGILIEA 121  
+ + Q+V L + YP N A VSY+ +L Q S+ G YV+ GGIGQR I I++EA  
Sbjct 89 TFEYQRAQDVSLQLTYPENSSDAAVSYLQLLCTQDSSEGTAYVVAGGIGQRLISIVLEA 148  
Query 122 RNTYTFYSYIAEIIYGL 136  
+NT FSY AE YG+  
Sbjct 149 KNTKYFSYQAEYYGV 163



> [ref|XP\\_002050287.1|](#)  GJ20290 [Drosophila virilis]

[gb|EDW61480.1|](#)  GJ20290 [Drosophila virilis]

Length=121

[GENE ID: 6626912 Dvir\GJ20290](#) | GJ20290 gene product from transcript GJ20290-RA [Drosophila virilis] (10 or fewer PubMed links)

Score = 112 bits (280), Expect = 1e-23, Method: Composition-based stats.  
Identities = 22/118 (18%), Positives = 47/118 (39%), Gaps = 3/118 (2%)

```
Query 21 FVRANPGVTLTKLD-NVRTARAIHNSLGQRVSGDRLVARNQDSASWGS LQNVQLTVNYP A 79
F+ ++L L + ++ + G R+ D + R + L+ V N+
Sbjct 5 FLAILGLLSLVALAQSEGNQSHSVTWGARIFRDMHLERAIITEKSKFLRVVSRYYNFTQ 64

Query 80 NGGYGAVVSYVSILVDQTSNLGN-GYVLYGGIGQRQIGILIEARNTYTF SYIAE IYGL 136
G Y ++ + + + G + GG I +++ + FS+I +IYG+
Sbjct 65 IG-YQRRITQIVVTDQIRNGQGFFARLEAGGPQATFAKIYFKSQRSKGF SFIVDIYGI 121
```

> [ref|XP\\_002004523.1|](#)  GI19567 [Drosophila mojavensis]

[gb|EDW08458.1|](#)  GI19567 [Drosophila mojavensis]

Length=118

[GENE ID: 6578615 Dmoj\GI19567](#) | GI19567 gene product from transcript GI19567-RA [Drosophila mojavensis] (10 or fewer PubMed links)

Score = 112 bits (280), Expect = 1e-23, Method: Composition-based stats.  
Identities = 22/115 (19%), Positives = 48/115 (41%), Gaps = 2/115 (1%)

```
Query 23 RANPGVTLTKLDNVRTARAIHNSLGQRVSGDRLVARNQDSASWGS LQNVQLTVNYPANG- 81
L L ++A +S G+R + D L++R + + ++YP G
Sbjct 1 MKFLYSCLLLLAVFAASQAFSSSWGKRNTDILLSRQNERRAPLKNNYWSVNIDYPRAGT 60

Query 82 GYGAVVSYVSILVDQTS-NLNGYVLYGGIGQRQIGILIEARNTYTF SYIAE IYG 135
+S++++ + + + + GG G R I + + + + E IYG
Sbjct 61 SNNYTSIFINVIDNFRNTSGATPSLWSGGPGYRYAQLNLRSLVSRGIDSTVEIYG 115
```

> [ref|XP\\_001986843.1|](#)  GH21597 [Drosophila grimshawi]

[gb|EDW01710.1|](#)  GH21597 [Drosophila grimshawi]

Length=116

[GENE ID: 6560462 Dgri\GH21597](#) | GH21597 gene product from transcript GH21597-RA [Drosophila grimshawi] (10 or fewer PubMed links)

Score = 111 bits (279), Expect = 2e-23, Method: Composition-based stats.  
Identities = 22/115 (19%), Positives = 48/115 (41%), Gaps = 2/115 (1%)

```
Query 23 RANPGVTLTKLDNVRTARAIHNSLGQRVSGDRLVARNQDSASWGS LQNVQLTVNYPANGG 82
+ L ++A S G+R S D L++R + + V++P +G
Sbjct 1 MKFYQSCVLLLLALFAASQAYSASWGGKRNNDYLLSRQTEVRYPIKNNYWNVDFPRSGT 60

Query 83 YG-AVVSYVSILVDQTSNLG-NGYVLYGGIGQRQIGILIEARNTYTF SYIAE IYG 135
+++V+++ + ++ G + GG G R + I + + + E I+G
Sbjct 61 TNMYSITFVNVIDNFRNSSGATPSLWSGGPGYRFVQINLRSLVKGGLNSTVEIYG 115
```

> [gb|AAQ09813.1|](#) CG15043 [Drosophila yakuba]

Length=164

Score = 111 bits (279), Expect = 2e-23, Method: Composition-based stats.  
Identities = 49/135 (36%), Positives = 76/135 (56%), Gaps = 7/135 (5%)

```
Query 9 SAKITLVEDVDFVRANPGVTLTKLDNVRT-----ARAIHNSLGQRVSGDRLVARNQD 61
S I +V D+ F +PG+ + ++ ++ + ++G R+ GD LVA+ D
Sbjct 29 STGIRVVNDIHFVFAAQHPGLQIQPMEKEIVPGKARVGSQTVRYNMGARIPGDALVAQTAD 88

Query 62 SASWGS LQNVQLTVNYPANGGYGAVVSYVSILVDQTSNLGNGYVLYGGIGQRQIGILIEA 121
+ + Q+V L + YP N A VSY+ ++ Q S+ G YV+ GGIGQR I I++EA
Sbjct 89 TFEYQRAQDVSLQLTYPENSSDAAVSYLQLVCTQDSSEGTAYVVAGGIGQRLISIVLEA 148

Query 122 RNTYTF SYIAE IYGL 136
+NT FSY AE YG+
Sbjct 149 KNTKYFSYQAEYYGV 163
```

> [ref|XP\\_001965516.1|](#)  GF22411 [Drosophila ananassae]  
[gb|EDV35031.1|](#)  GF22411 [Drosophila ananassae]  
Length=157  
[GENE ID: 6505072 Dana\GF22411](#) | GF22411 gene product from transcript GF22411-RA [Drosophila ananassae] (10 or fewer PubMed links)  
Score = 111 bits (279), Expect = 2e-23, Method: Composition-based stats.  
Identities = 59/135 (43%), Positives = 84/135 (62%), Gaps = 9/135 (6%)

Query 9 SAKITLVEDVDEFVRANPGVTLTKLDNVRT-----ARAIHNSLGQRVSGDRLVARNQ 60  
SA+I +V+D+ EFV +PGV L ++ + + +LG R+ GDRLVA+  
Sbjct 23 SARILVVKDIKEFVVQHPGVHLQAMEKEVVPKAREAGSLTVRYNLGARIGGDRLVAQGA 82  
Query 61 DSASWGS LQNVQLTVNYPANGGYGAVVSVYSILVDQTSNLGNGYVLYGGIGQRQIGILIE 120  
D+ ++ LQ+V L + YP +G GA+VSYV IL Q + G+ YV+ GGIGQR I I++E  
Sbjct 83 DTFNYSQLQDVSLQLTYPESGA-GAIVSYVQILCTQDDSDGSAYVIAGGIGQRLLISIVLE 141  
Query 121 ARNTYTF SYIAE IYG 135  
A+NT FSY E YG  
Sbjct 142 AKNTRNFSYHVEY YG 156

> [ref|XP\\_001965515.1|](#)  GF22412 [Drosophila ananassae]  
[gb|EDV35030.1|](#)  GF22412 [Drosophila ananassae]  
Length=162  
[GENE ID: 6505073 Dana\GF22412](#) | GF22412 gene product from transcript GF22412-RA [Drosophila ananassae] (10 or fewer PubMed links)  
Score = 111 bits (279), Expect = 2e-23, Method: Composition-based stats.  
Identities = 40/128 (31%), Positives = 71/128 (55%), Gaps = 1/128 (0%)

Query 9 SAKITLVEDVDEFVRANPGVTLTKLDNVRTARAIH-NSLGQRVSGDRLVARNQDSASWGS 67  
+IT V D + +P V LT++D V+ ++ + G+R GDR++ + DS S+ S  
Sbjct 34 YTEITPVTDDTRYTTIHPEVVLTEMKVKHSGKGNVFTSGERTKGRVIVNHYDSESFAS 93  
Query 68 LQNVQLTVNYPANGGYGAVVSVYSILVDQTSNLGNGYVLYGGIGQRQIGILIEARNYTF 127  
+ ++ +NYP+ G ++ + I V+ ++N GY+ GGIG + +L+ + T TF  
Sbjct 94 AVDTEVLMNYPGSSGTITLTCIEIYVEMSANDTGGYITSGGIGNFVNEVLLTSLNLTTF 153  
Query 128 SYIAE IYG 135  
+Y IYG  
Sbjct 154 AYETFIYG 161

> [ref|XP\\_001238394.2|](#)  AGAP011630-PA [Anopheles gambiae str. PEST]  
[gb|EAU75892.2|](#)  AGAP011630-PA [Anopheles gambiae str. PEST]  
Length=120  
[GENE ID: 4577506 AgaP\\_AGAP011630](#) | AGAP011630-PA [Anopheles gambiae str. PEST] (10 or fewer PubMed links)  
Score = 111 bits (278), Expect = 2e-23, Method: Composition-based stats.  
Identities = 24/103 (23%), Positives = 43/103 (41%), Gaps = 1/103 (0%)

Query 34 DNVRTARAIHNSLGQRVSGDRLVARNQDSASWGS LQNVQLTVNYPANGGYGAVVSVYSIL 93  
+ TA+ + G R+ D LV + S L+ ++YP G G ++ + +  
Sbjct 17 ACMVTAQTHNYFFGSRIPYDSLNVNQTTVIQSSSFLRVKSAYLDYPLKQGRGRNITAIYVY 76  
Query 94 VDQTSNLGN-GYVLYGGIGQRQIGILIEARNYTF SYIAE IYG 135  
S G + GGIG+ I ++ + ++ EIYG  
Sbjct 77 DRLGSGRGGYASITSGGIGKNYTRINLKTQRNGMNFQVEIYG 119

> [ref|XP\\_001360670.1|](#)  GA12205 [Drosophila pseudoobscura pseudoobscura]  
[gb|EAL25245.1|](#)  GA12205 [Drosophila pseudoobscura pseudoobscura]  
Length=116  
[GENE ID: 4804045 Dpse\GA12205](#) | GA12205 gene product from transcript GA12205-RA [Drosophila pseudoobscura pseudoobscura] (10 or fewer PubMed links)  
Score = 111 bits (278), Expect = 2e-23, Method: Composition-based stats.  
Identities = 21/115 (18%), Positives = 41/115 (35%), Gaps = 2/115 (1%)

Query 23 RANPGVTLTKLDNVRTARAIHNSLGQRVSGDRLVARNQDSASWGSLQNVQLTVNYPANGG 82  
+ + S G+R S D L++R + S + V++P G  
Sbjct 1 MKFLLSLTILVAAIFVYVYGSSASWGRRNSNDYLLSRQVEVRSPKNNYWNVDFPFRAGT 60  
Query 83 YG-AVVSYSVILVDQTS-NLGNVYVLYGGIGQRQIGILIEARNTYTFYSYIAEIIYG 135  
+S + + + + + + GG G R I + + + + EIIYG  
Sbjct 61 VNYYNISAI FVYDNFKNTSGATPALWSGGPGFRFAQINLRSQVNRGLNSTIEIYG 115

>  [gb|ABR27888.1](#) putative salivary secreted protein [Triatoma infestans]  
Length=136

Score = 111 bits (277), Expect = 3e-23, Method: Composition-based stats.  
Identities = 29/122 (23%), Positives = 52/122 (42%), Gaps = 6/122 (4%)

Query 21 FVRANPGVTLTKL----DNVRTARAIHNSLGQRVSGDRLVARNQDSASWGSLQNVQLTVN 76  
F + N + + + G R GD+L+ + + + W L VQ V  
Sbjct 12 FTVGIVIALIIPSPAWAANKCEGKSHNATFGMRKPGDKLIHKERIKSVWKLKSFVQKQDVT 71  
Query 77 YPANGGYG-AVVSYSVILVDQTSNLGN-GYVLYGGIGQRQIGILIEARNTYTFYSYIAEIIY 134  
YPA +++Y+ I T G + + GG+G + I + + + T +I EIIY  
Sbjct 72 YPAKDKKRKYIITYIKITDRYTDGHGCCASIVKGGVGYDHVKIHTKSQFTRGLDFIIEIY 131  
Query 135 GL 136  
G+  
Sbjct 132 GI 133

>  [ref|XP\\_002016256.1](#)  GL10591 [Drosophila persimilis]  
[gb|EDW32146.1](#)  GL10591 [Drosophila persimilis]  
Length=116

[GENE ID: 6591102 Dper\GL10591](#) | GL10591 gene product from transcript GL10591-RA  
[Drosophila persimilis] (10 or fewer PubMed links)

Score = 110 bits (276), Expect = 3e-23, Method: Composition-based stats.  
Identities = 22/115 (19%), Positives = 41/115 (35%), Gaps = 2/115 (1%)

Query 23 RANPGVTLTKLDNVRTARAIHNSLGQRVSGDRLVARNQDSASWGSLQNVQLTVNYPANGG 82  
+ + S G+R S D L++R + S + V++P G  
Sbjct 1 MKFLLSLTILVAAIFVYVYGSSASWGRRNSNDYLLSRQVEVRSPKNNYWNVDFPFRAGT 60  
Query 83 YG-AVVSYSVILVDQTSNLGN-GYVLYGGIGQRQIGILIEARNTYTFYSYIAEIIYG 135  
+S + + + + G + + GG G R I + + + + EIIYG  
Sbjct 61 VNYYNISAI FVYDNFKNTSGAAPALWSGGPGFRFAQINLRSQVNRGLNSTIEIYG 115

>  [ref|XP\\_002062967.1](#)  GK21639 [Drosophila willistoni]  
[gb|EDW73953.1](#)  GK21639 [Drosophila willistoni]  
Length=116

[GENE ID: 6640510 Dwil\GK21639](#) | GK21639 gene product from transcript GK21639-RA  
[Drosophila willistoni] (10 or fewer PubMed links)

Score = 110 bits (276), Expect = 4e-23, Method: Composition-based stats.  
Identities = 20/115 (17%), Positives = 46/115 (40%), Gaps = 2/115 (1%)

Query 23 RANPGVTLTKLDNVRTARAIHNSLGQRVSGDRLVARNQDSASWGSLQNVQLTVNYPANGG 82  
++ L + + S G+R + D L++R + + + V++P G  
Sbjct 1 MKFLLSSVFLALGASYGYSASWGKRANNDYLLSRQIEVRNPIKNNYWSVNVDFPFRAGT 60  
Query 83 YG-AVVSYSVILVDQTSNLGN-NYVLYGGIGQRQIGILIEARNTYTFYSYIAEIIYG 135  
+S V + + ++ G + + GG G R + + + + + EI+G  
Sbjct 61 VNYYNISAVFVYDNFKNSSGASPSLWSGGPGYRFATVNLRLSVKGINSTVEIIG 115

>  [gb|ABR27890.1](#) putative salivary secreted peptide [Triatoma infestans]  
Length=136

Score = 110 bits (274), Expect = 7e-23, Method: Composition-based stats.  
Identities = 29/122 (23%), Positives = 52/122 (42%), Gaps = 6/122 (4%)

Query 21 FVRANPGVTLTKL----DNVRTARAIHNSLGQRVSGDRLVARNQDSASWGSLQNVQLTVN 76  
F + N + + + G R GD+L+ + + + W L VQ V  
Sbjct 12 FTVGIVIALIIPSPAWAANKCEGKSHNVTFGMRTPGDKLIHKERIKSIWKLKSFVQKQDVT 71

Query 77 YPANGGYG-AVVSYSILVDQTSNLGN-GYVLYGGIGQRQIGILIEARNTYTFYSYIAEY 134  
YPA +++Y+ I T G ++ GG+G + I +++ T +I EIY  
Sbjct 72 YPAKDKKRKYIITYIKITDRYTDGHGCCASIVKGGVGYDVKIHTKSQFTRGLDFIIEY 131

Query 135 GL 136  
G+  
Sbjct 132 GI 133

> [ref|XP\\_002059069.1](#)  GJ15192 [Drosophila virilis]

[gb|EDW58138.1](#)  GJ15192 [Drosophila virilis]  
Length=140

[GENE ID: 6635433 Dvir\GJ15192](#) | GJ15192 gene product from transcript GJ15192-RA [Drosophila virilis] (10 or fewer PubMed links)

Score = 109 bits (272), Expect = 1e-22, Method: Composition-based stats.  
Identities = 42/129 (32%), Positives = 72/129 (55%), Gaps = 1/129 (0%)

Query 8 VSAKITLVEDVDFVRANPGVTLTKLDNVRTARAI-HNSLGQRVSGDRLVARNQDSASWG 66  
V IT V D + NPGV L L+ V+ A+ S G+R++GD+L+ + D S+  
Sbjct 11 VYTPITSVTDATRYTSKNPGVELLALNKVKHAKGNIVFSAGERITGDKLLVNSYDDESFT 70

Query 67 SLQNVQLTVNYPANGGYGAVVSYSILVDQTSNLGNGYVLYGGIGQRQIGILIEARNTYT 126  
+ +++++ + Y ++ G G ++ + I VD +++ + Y + GGIG+ + IL+ T T  
Sbjct 71 TTVDIEVEMTYSSSSGTGVTLSIEIYVDTSADDADAYFINGGIGKSKASILLACNQTRT 130

Query 127 FSYIAEYIG 135  
FSY A YG  
Sbjct 131 FSYEAFYIG 139

> [ref|XP\\_002059818.1](#)  GJ15031 [Drosophila virilis]

[gb|EDW57155.1](#)  GJ15031 [Drosophila virilis]  
Length=118

[GENE ID: 6636459 Dvir\GJ15031](#) | GJ15031 gene product from transcript GJ15031-RA [Drosophila virilis] (10 or fewer PubMed links)

Score = 109 bits (272), Expect = 1e-22, Method: Composition-based stats.  
Identities = 17/114 (14%), Positives = 38/114 (33%), Gaps = 1/114 (0%)

Query 23 RANPGVTLTKLDNVRTARAIHNSLGQRVSGDRLVARNQDSASWGLQNVQLTVNYPANGG 82  
G+ L L G+ D +A++ S ++ + +  
Sbjct 4 VTLVGLVLCCFLVTSAYAGNDYLWGEIGPNDYQLAKDTVSKAFFLGLVQTKKYVFKQSNN 63

Query 83 YGA-VVSYSILVDQTSNLGNGYVLYGGIGQRQIGILIEARNTYTFYSYIAEYIG 135  
A ++ + + + +N + GG G + I ++ Y + EI+G  
Sbjct 64 LDALTITAIRVTDKKNNGATAVLTAGGPGSKGATIQTFSQRGYGIKDLVEIWG 117

> [ref|XP\\_001997725.1](#)  GH17985 [Drosophila grimshawi]

[gb|EDW04958.1](#)  GH17985 [Drosophila grimshawi]  
Length=116

[GENE ID: 6571537 Dgri\GH17985](#) | GH17985 gene product from transcript GH17985-RA [Drosophila grimshawi] (10 or fewer PubMed links)

Score = 108 bits (271), Expect = 2e-22, Method: Composition-based stats.  
Identities = 21/108 (19%), Positives = 49/108 (45%), Gaps = 2/108 (1%)

Query 30 LTKLDNVRTARAIHNSLGQRVSGDRLVARNQDSASWGLQNVQLTVNYPANGGYG-AVVS 88  
+ L ++A S G++ S D L++R + + + V++P +G ++  
Sbjct 8 VLLLAFFAASQAYSASWGKKNNDYLLSRQTEVRNPIKNNYWNVDFPRSGTTNMYNIT 67

Query 89 YVSILVDQTSNLG-NGYVLYGGIGQRQIGILIEARNTYTFYSYIAEYIG 135  
+V+++ + ++ G + GG G R + I + + + EI+G  
Sbjct 68 FVNVIDNFRNSSGATPSLWSGGPGYRFVQINLRSLVSQGMDSSTVEIWG 115

> [ref|XP\\_001977672.1](#)  GG18115 [Drosophila erecta]

[gb|EDV46599.1](#)  GG18115 [Drosophila erecta]  
Length=163

[GENE ID: 6550162 Dere\GG18115](#) | GG18115 gene product from transcript GG18115-RA

[Drosophila erecta] (10 or fewer PubMed links)

Score = 108 bits (271), Expect = 2e-22, Method: Composition-based stats.  
Identities = 53/135 (39%), Positives = 78/135 (57%), Gaps = 8/135 (5%)

Query 9 SAKITLVEDVDEFVRANPGVTLTKLDNVRT---ARAIHNSL---GQRVSGDRLVARNQD 61  
S + +V D+ EF +PG+ + +++ ARA ++ G R+ GD LVA+ D  
Sbjct 29 STGVRVSDIHEFAAQHPGLQIQQMEKELVPGKARAGSLTVRYNMGARIPGDALVAQTAD 88

Query 62 SASWGLQNVQLTVNYPANGGYGAVVSVSILVDQTSNLGNGYVLYGGIGQRQIGILIEA 121  
+ + Q+V L + YP G GA VSYV ++ Q SN G YV+ GGIGQ I I++EA  
Sbjct 89 TYEYPRAQDVSLQLTYPEK GK-GAAVSVVELVCTQDSNEGTA YVVAGGIGQTLISIVVEA 147

Query 122 RNTYTFYSYIAEIIYGL 136  
+NT FSY A+ YG+  
Sbjct 148 KNTKNFSYQAQYYGV 162

>  [gb|AAV84229.1](#) unknown [Culicoides sonorensis]  
Length=168

Score = 108 bits (271), Expect = 2e-22, Method: Composition-based stats.  
Identities = 65/136 (47%), Positives = 88/136 (64%), Gaps = 3/136 (2%)

Query 2 APDPETVSAKITLVEDVDEFVRANPGVTLTKLDNVRTARAIH--NSLGQRVSGDRLVARN 59  
+P + AKI LV+D+++F A+P + LT+L +LG RV GD LVA  
Sbjct 33 EDNPVPLDAKIVLVDINKFKAAHPDLQLTELVRSEKQPRNSIRYTLGARVVGDTLVATK 92

Query 60 QDSASWGLQNVQLTVNYPANGGYGAVVSVSILVDQTSNLGNGYVLYGGIGQRQIGILI 119  
D AS+G+ QNV+LT+ YP +G GAVV++V + V Q+SN+G GYV GGIGQR I I+I  
Sbjct 93 SDFASYGT AQNVKLTLYPTSG-TGAVVTHVLVDVQSSNVGKGYVTGGIGQR YIQIVI 151

Query 120 EARNTYTFYSYIAEIIYG 135  
EA++T F Y A IYG  
Sbjct 152 EAQSTTYFGYSAYIYG 167

>  [ref|XP\\_002005185.1](#)  GI19218 [Drosophila mojavensis]  
[gb|EDW09120.1](#)  GI19218 [Drosophila mojavensis]  
Length=121

[GENE ID: 6579289 Dmoj\GI19218](#) | GI19218 gene product from transcript GI19218-RA  
[Drosophila mojavensis] (10 or fewer PubMed links)

Score = 108 bits (270), Expect = 2e-22, Method: Composition-based stats.  
Identities = 20/119 (16%), Positives = 42/119 (35%), Gaps = 3/119 (2%)

Query 20 EFVRANPGVTLTKLD-NVRTARAIHNSLGQRVSGDRLVARNQDSASWGLQNVQLTVNYP 78  
++ +L + + + G R D + R S L+ V T +  
Sbjct 4 VYLALLVSFSLAVGRAAGKNESHSVTWGSRFRDMHLERVIIEKSKFLRVVTRTYTFK 63

Query 79 ANGGYGAVVSVSILVDQTSNLGN-GYVLYGGIGQRQIGILIEARNTYTFYSYIAEIIYGL 136  
G +++ + + + G + GG I +++ FS+I +IYG+  
Sbjct 64 QTGVQ-RLITQIVVTDQIKNGNGGYARLEAGGPNTNFAKIYFKSQRNKEFSFIVDIYGI 121

>  [ref|XP\\_001660534.1](#)  hypothetical protein AaeL\_AAEL009985 [Aedes aegypti]  
[gb|EAT38090.1](#)  conserved hypothetical protein [Aedes aegypti]  
Length=158

[GENE ID: 5572717 AaeL\\_AAEL009985](#) | hypothetical protein [Aedes aegypti]  
(10 or fewer PubMed links)

Score = 108 bits (269), Expect = 3e-22, Method: Composition-based stats.  
Identities = 64/136 (47%), Positives = 90/136 (66%), Gaps = 2/136 (1%)

Query 1 TAPDPETVSAKITLVEDVDEFVRANPGVTLTKLDNVRTA-RAIHNSLGQRVSGDRLVARN 59  
+P + AKI +V+D+ F A+P + + L+ R+ + I +LG R+SGDRLV +  
Sbjct 23 AEEEPLQIDAKIEVVQDIAAFKAAHPDLVVPLEVARSTRQQIVYTLGNRLSGDRLVGTG 82

Query 60 QDSASWGLQNVQLTVNYPANGGYGAVVSVSILVDQTSNLGNGYVLYGGIGQRQIGILI 119  
QD SW +LQ+V L + YP G GAVVSYV ++V+Q+SN G GYV+ GGIGQR I ++I  
Sbjct 83 QDGTSWSNLQDVTNLNRYLPQAGS-GAVVSYVQVVVNQSSNQGRGYVVS GGIGQR YIQIVI 141

Query 120 EARNTYTFYSYIAEIIYG 135  
EA +T F Y A+IYG  
Sbjct 142 EAYSTSYFQYNAQIYG 157

> [ref|XP\\_002050017.1|](#) **G** GJ21904 [Drosophila virilis]

[gb|EDW61210.1|](#) **G** GJ21904 [Drosophila virilis]  
Length=118

[GENE ID: 6625994 Dvir\GJ21904](#) | GJ21904 gene product from transcript GJ21904-RA [Drosophila virilis] (10 or fewer PubMed links)

Score = 107 bits (268), Expect = 3e-22, Method: Composition-based stats.  
Identities = 27/117 (23%), Positives = 48/117 (41%), Gaps = 3/117 (2%)

```
Query 21 FVRANPGVTLTKLDNVRTARAIHNSLGQRVSGDRLVARNQDSASWGS LQNVQLTVNYPAN 80
          F P L L V A ++ ++ G + +L+ + V + YP N
Sbjct 2 FFSVLP SFLLVFLCVVP-AYSVSSTWGNISNSAQLLHAENVVYGSSSPGKYVDHEIKYPTN 60

Query 81 G-GYGAVVSYVSILVDQTSNLGN-GYVLYGGIGQRQIGILIEARN TYTFSYIAE IYG 135
          G G G +++ + T+N G + GG G + I ++++ Y + EIYG
Sbjct 61 GIGNGRIITGIRAFDQVTNNTGGHATIYSGGPGFNFVNIK LQSQYNYGLIFRVEIYG 117
```

> [ref|XP\\_001986842.1|](#) **G** GH21596 [Drosophila grimshawi]

[gb|EDW01709.1|](#) **G** GH21596 [Drosophila grimshawi]  
Length=116

[GENE ID: 6560029 Dgri\GH21596](#) | GH21596 gene product from transcript GH21596-RA [Drosophila grimshawi] (10 or fewer PubMed links)

Score = 107 bits (267), Expect = 4e-22, Method: Composition-based stats.  
Identities = 21/108 (19%), Positives = 49/108 (45%), Gaps = 2/108 (1%)

```
Query 30 LTKLDNVRTARAIHNSLGQRVSGDRLVARNQDSASWGS LQNVQLTVNYPANGGYG-AVVS 88
          + L ++A +S G++ S D L++R + + V++P +G ++
Sbjct 8 VLLLAFFAASQAYSSSWGKNSNDYLLSRQTEVRYPIKNNYWNVNVDFPRSGTTNMYNIT 67

Query 89 YVSILVDQTSNLG-NGYVLYGGIGQRQIGILIEARN TYTFSYIAE IYG 135
          +V+++ + ++ G + GG G R + I + + + EI+G
Sbjct 68 FVNVIDNFRNSSGATPSLWSGGPGYRFVQINLRSLV SQGMDSTVEIWG 115
```

> [ref|XP\\_002004350.1|](#) **G** GI19667 [Drosophila mojavensis]

[gb|EDW08285.1|](#) **G** GI19667 [Drosophila mojavensis]  
Length=120

[GENE ID: 6578439 Dmoj\GI19667](#) | GI19667 gene product from transcript GI19667-RA [Drosophila mojavensis] (10 or fewer PubMed links)

Score = 107 bits (267), Expect = 5e-22, Method: Composition-based stats.  
Identities = 16/119 (13%), Positives = 38/119 (31%), Gaps = 1/119 (0%)

```
Query 18 VDEFVRANPGVTLTKLDNVRTARAIHNSLGQRVSGDRLVARNQDSASWGS LQNVQLTVNY 77
          + G+ L + G+ D +A++ S ++ +
Sbjct 1 MGFHSITLVGLLLCAVGLATVHAGNDYLWGEIGPN DYHLAKD TVSKAFFVGLVQTKKYVF 60

Query 78 PANGGYGA-VVSYVSILVDQTSNLGNGYVLYGGIGQRQIGILIEARN TYTFSYIAE IYG 135
          A ++ + + + S+ ++ GG G + I + Y + EI+G
Sbjct 61 KQKDNLDAL TITAIKVTDKKKSHGATAVLVSGGPGSKGATI QFTSERGYGIKDVVEIWG 119
```

> [ref|NP\\_573300.1|](#) **UG** CG15043 [Drosophila melanogaster]

[gb|AAF48850.1|](#) **G** CG15043 [Drosophila melanogaster]  
[gb|AAM29471.1|](#) **G** RE41194p [Drosophila melanogaster]  
[gb|ACL86770.1|](#) CG15043-PA [synthetic construct]  
[gb|ACL91442.1|](#) CG15043-PA [synthetic construct]  
Length=163

[GENE ID: 32835 CG15043](#) | CG15043 gene product from transcript CG15043-RA [Drosophila melanogaster] (Over 10 PubMed links)

Score = 107 bits (267), Expect = 5e-22, Method: Composition-based stats.  
Identities = 48/134 (35%), Positives = 76/134 (56%), Gaps = 8/134 (5%)

```
Query 10 AKITLVEDVDVEFVRANPGVTLTKLDNVRT-----ARAIHNSLGQRVSGDRLVARNQDS 62
          I +V+++ F PG+ + +++ ++ + ++G R+ GD LVA+ ++
```

Sbjct 30 TGIQVVDNIHVFAAQYPGLQIQQMEKEIVPAKARVGSQTVRYNMGARIPGDELVAQTANT 89

Query 63 ASWGSLSQNVQLTVNYPANGGYGAVVSYVSIQVSDQTSNLGNGYVLYGGIGQRQIGILIEAR 122  
 + Q+V L + YP NG GA VSYV +L Q +N G YV+ GGIGQ I I++EA+

Sbjct 90 YEFPPAQDVSLSLQTYPENK-GATVSYVELLCTQDTNEGTAYVVAGGIGQSLISIVLEAK 148

Query 123 NTTYTFSYIAEIIYGL 136  
 NT FSY A YG+

Sbjct 149 NTKNFSYQALYYGV 162

>  [gb|AAV84228.1](#) unknown [Culicoides sonorensis]  
 Length=168

Score = 106 bits (266), Expect = 6e-22, Method: Composition-based stats.  
 Identities = 64/136 (47%), Positives = 87/136 (63%), Gaps = 3/136 (2%)

Query 2 APDPETVSAKITLVEDVDEFVRANPGVTLTKLDNVRTARAIH--NSLGQRVSGDRLVARN 59  
 +P + AKI LV+D+++F A+P + T+L +LG RV GD LVA

Sbjct 33 EDNPVPLDAKIVLVDINKFRAAHPDLQFTELVRSKQPRNSIRYTLGARVVGDTLVATK 92

Query 60 QDSASWGSLSQNVQLTVNYPANGGYGAVVSYVSIQVSDQTSNLGNGYVLYGGIGQRQIGILI 119  
 D AS+G+ QNV+LT+ YP +G GAVV++V + V Q+SN+G GYV GGIGQR I I+I

Sbjct 93 SDFASYGTAQNVLKTLTYPTSG-TGAVVTHVLVDVQSSNVGKGYVTAGGIGQRYYIQIVI 151

Query 120 EARNTYTFYSYIAEIIYG 135  
 EA++T F Y A IYG

Sbjct 152 EAQSTTYFGYSAYIYG 167

>  [ref|XP\\_001868963.1](#)  14.5 kDa salivary protein [Culex quinquefasciatus]  
[gb|EDS28050.1](#)  14.5 kDa salivary protein [Culex quinquefasciatus]  
 Length=166

[GENE ID: 6052739 CpipJ\\_CPIJ018795](#) | 14.5 kDa salivary protein  
 [Culex quinquefasciatus]

Score = 106 bits (266), Expect = 6e-22, Method: Composition-based stats.  
 Identities = 57/137 (41%), Positives = 93/137 (67%), Gaps = 4/137 (2%)

Query 2 APDPETVSAKITLVEDVDEFVRANPGVTLTKLDNVRTA---RAIHNSLGQRVSGDRLVAR 58  
 D + + +I L++D++ F AN + +T L+ +++ + I + GQR++GD LV+

Sbjct 29 DSDQSTAVRIDLIDIEAFRAANANLKVTPLEIKSNDVRRQIIYAQQRIAGDSLVS 88

Query 59 NQDSASWGSLSQNVQLTVNYPANGGYGAVVSYVSIQVSDQTSNLGNGYVLYGGIGQRQIGIL 118  
 N +S W LQ+V + ++YPA+G GAV++YV ++V+Q+SN G GYV+ GGIGQR I ++

Sbjct 89 NSESKQWPRQLQDVTMNLSPASG-VGAVITYVQVIVNQSSNSGKGYVIAGGIGQRFIHLV 147

Query 119 IEARNYTFYSYIAEIIYG 135  
 IEA +T FSY ++IYG

Sbjct 148 IEAHSTSYFSYNSQIYG 164

>  [ref|XP\\_002063501.1](#)  GK21373 [Drosophila willistoni]  
[gb|EDW74487.1](#)  GK21373 [Drosophila willistoni]  
 Length=124

[GENE ID: 6640062 Dwil\GK21373](#) | GK21373 gene product from transcript GK21373-RA  
 [Drosophila willistoni] (10 or fewer PubMed links)

Score = 106 bits (265), Expect = 7e-22, Method: Composition-based stats.  
 Identities = 16/110 (14%), Positives = 37/110 (33%), Gaps = 1/110 (0%)

Query 27 GVTLTKLDNVRTARAIHNSLGQRVSGDRLVARNQDSASWGSLSQNVQLTVNYPANGGYGA- 85  
 V + +G+ D +A++ ++ T + A

Sbjct 14 LVVCIAYLVPGASAGNDYLWGEIGPNDYKLAKDTVKKAFFVGLVQTSTYTFQKDNLNLAL 73

Query 86 VVSYSVSIQVSDQTSNLGNGYVLYGGIGQRQIGILIEARNYTFYSYIAEIIYG 135  
 ++ + + + SN ++ GG G + I +++ Y + EI+G

Sbjct 74 TITAIQVTDKKSNGATAQLISGGPGSKGATIKFKSKRGYGIKDVVEIWG 123

>  [gb|ACT79296.1](#) putative fatbody protein 3Rev-G1 [Bombyx mori]  
 Length=118

Score = 106 bits (265), Expect = 7e-22, Method: Composition-based stats.



Identities = 23/114 (20%), Positives = 48/114 (42%), Gaps = 2/114 (1%)

```
Query 24 ANPGVTLTKLDNVRTARAIHNSLGQRVSGDRLVARNQDSASWGLQNVQLTVNYPANGGY 83
A + + L + +A++ LGQ D + + + + + YP G
Sbjct 3 AFTVLLIACLCLLACSQAQSHDLGLGQLTYRDIIVLYKINEYKYGFPFVIRTSEIEYPEPGQQ 62

Query 84 G-AVVSYSVILVDQTSNLGN-GYVLYGGIGQRQIGILIEARNTYTFYSYIAEYIG 135
A +S + + T G V GG+GQ+ + + +++++ + F++ IYG
Sbjct 63 NFAYISAIYVKDHYTDGNGGYPVKSQGGVQKFKVKKLKSQRGHGFNFVTVIYIG 116
```

> [ref|XP\\_001975823.1|](#)  GG22531 [Drosophila erecta]

[gb|EDV56223.1|](#)  GG22531 [Drosophila erecta]  
Length=112

[GENE ID: 6549589 Dere\GG22531](#) | GG22531 gene product from transcript GG22531-RA [Drosophila erecta] (10 or fewer PubMed links)

Score = 106 bits (265), Expect = 7e-22, Method: Composition-based stats.  
Identities = 24/114 (21%), Positives = 45/114 (39%), Gaps = 4/114 (3%)

```
Query 23 RANPGVTLTKLDNVRTARAIHNSLGQRVSGDRLVARNQDSASWGLQNVQLTVNYPANGG 82
+ L + A + G+RV+ D L++R ++ + L VNYP A
Sbjct 1 MRLLLILSVVLAVILGCHAYSATWGRRVNDFLLSRTREVRNPIKNNYWNLVNYP A--- 57

Query 83 YGAVVSYSVILVDQTSNLG-NGYVLYGGIGQRQIGILIEARNTYTFYSYIAEYIG 135
+S V + + ++ G + + GG G R + + + EI+G
Sbjct 58 GFYNISAVIVYDNFNKSSGASPSLYSGGPGYRFATVNLRGQVNRGIDSTVEIWG 111
```

> [ref|XP\\_002005815.1|](#)  GI18871 [Drosophila mojavensis]

[gb|EDW09750.1|](#)  GI18871 [Drosophila mojavensis]  
Length=119

[GENE ID: 6579942 Dmoj\GI18871](#) | GI18871 gene product from transcript GI18871-RA [Drosophila mojavensis] (10 or fewer PubMed links)

Score = 106 bits (265), Expect = 7e-22, Method: Composition-based stats.  
Identities = 26/117 (22%), Positives = 49/117 (41%), Gaps = 2/117 (1%)

```
Query 21 FVRANPGVTLTKLDNVRTARAIHNSLGQRVSGDRLVARNQDSASWGLQNVQLTVNYPAN 80
FV L L V ++ ++ G + +L+ + + V+ + YP N
Sbjct 2 FVSVVVPCFLLVLYCVAPVLSVSSTWGNISNSAQLLHAENVVYTSSPEKYVEHEIKYPTN 61

Query 81 G-GYGAUVSYVILVDQTSNLGN-GYVLYGGIGQRQIGILIEARNTYTFYSYIAEYIG 135
G G G +++ + T+N G + GG G + I +++++ Y + EIYG
Sbjct 62 GIGNGRIITGIRAFDQVTNNTGGHATYISGGPGFNFVNIKLSQYNYGLIFRVEIYG 118
```

> [gb|ABV44744.1|](#) 14.4 kDa midgut protein [Phlebotomus papatasi]  
Length=153

Score = 106 bits (265), Expect = 7e-22, Method: Composition-based stats.  
Identities = 125/136 (91%), Positives = 131/136 (96%), Gaps = 0/136 (0%)

```
Query 1 TAPDPETVSAKITLVEDVDEFVRANPGVTLTKLDNVRTARAIHNSLGQRVSGDRLVARNQ 60
TAPDPETVSAKITLVEDVDEFVRANPGVTLTKLDN+RTA AIH SLGQRVSGDRLVAR Q
Sbjct 18 TAPDPETVSAKITLVEDVDEFVRANPGVTLTKLDNLRTAGAIHYSLGQRVSGDRLVARGQ 77

Query 61 DSASWGLQNVQLTVNYPANGGYGAVVSYSVILVDQTSNLGNQYVLYGGIGQRQIGILIE 120
DSASWGS Q++QLT+NYPANGGYGAVVSYSV+LVDQTSNLG GYVLYGGIGQRQIGILIE
Sbjct 78 DSASWGSQDLQLTLNYPANGGYGAVVSYSVILVDQTSNLGGYVLYGGIGQRQIGILIE 137

Query 121 ARNTYTFYSYIAEYIGL 136
ARNTYTFYSYIAE+YGL
Sbjct 138 ARNTYTFYSYIAEYVGL 153
```

> [ref|XP\\_002081284.1|](#)  GD25794 [Drosophila simulans]

[gb|EDX06869.1|](#)  GD25794 [Drosophila simulans]  
Length=112

[GENE ID: 6734255 Dsim\GD25794](#) | GD25794 gene product from transcript GD25794-RA [Drosophila simulans] (10 or fewer PubMed links)

Score = 106 bits (265), Expect = 7e-22, Method: Composition-based stats.

Identities = 23/114 (20%), Positives = 44/114 (38%), Gaps = 4/114 (3%)

```
Query 23 RANPGVTLTKLDNVRTARAIHNSLGQRVSGDRLVARNQDSASWGS LQNVQLTVNYPANGG 82
      + L + A + G+RV+ D L++R ++ + L VNYP
Sbjct 1 MRLLLLILSVVLAVILGCHAYSATWGRRVNNDFFLLSRTREVRNPIKNNYWNLMNVNYP--N 57

Query 83 YGAVVSYSVILVDQTSNLG-NGYVLYGGIGQRQIGILIEARNTYTFYSYIAEIIYG 135
      +S V + + ++ G + + GG G R + + + EI+G
Sbjct 58 GFYNISAVIVYDNFKNSSGASPSLYSGGPGYRFATVNLRGQVNRGIDSTVEIWG 111
```

> [ref|XP\\_001664091.1|](#)  hypothetical protein AaeL\_AAEL013885 [Aedes aegypti]  
[gb|EAT33840.1|](#)  conserved hypothetical protein [Aedes aegypti]  
Length=158

[GENE ID: 5578882 AaeL\\_AAEL013885](#) | hypothetical protein [Aedes aegypti]  
(10 or fewer PubMed links)

Score = 106 bits (264), Expect = 9e-22, Method: Composition-based stats.  
Identities = 65/136 (47%), Positives = 90/136 (66%), Gaps = 2/136 (1%)

```
Query 1 TAPDPETVSAKITLVEDVDEFVRANPGVTLTKLDNVRTA-RAIHNSLGQRVSGDRLVARN 59
      T +P + AKI +V+D+ F A+P + + L+ R+ + I +LG R+SGDRLV +
Sbjct 23 TEEEP LQIDAKIEVVQDIAAFKAAHP ELDDVVPLEVARSTRQQIVYTLGNRLSGDRLVGT S 82

Query 60 QDSASWGS LQNVQLTVNYPANGGYGAVVSYSVILVDQTSNLGNGYVLYGGIGQRQIGILI 119
      QD SW SLQ+V L + YP G GAVVSYSV ++V+Q+SN G GYV+ GGIGQR I ++I
Sbjct 83 QDGTSSWSS LQDVTNLNLRYPQAGS-GAVVSYSVQVVVNQSSNQGRGYVSSGGIGQR YIQLVI 141

Query 120 EARNTYTFYSYIAEIIYG 135
      E +T F Y A+IYG
Sbjct 142 EVYSTSYFQYNAQIYG 157
```

> [ref|XP\\_001987508.1|](#)  GH21960 [Drosophila grimshawi]  
[gb|EDW02375.1|](#)  GH21960 [Drosophila grimshawi]  
Length=122

[GENE ID: 6561150 Dgri\GH21960](#) | GH21960 gene product from transcript GH21960-RA  
[Drosophila grimshawi] (10 or fewer PubMed links)

Score = 106 bits (264), Expect = 9e-22, Method: Composition-based stats.  
Identities = 15/115 (13%), Positives = 35/115 (30%), Gaps = 1/115 (0%)

```
Query 22 VRANPGVTLTKLDNVRTARAIHNSLGQRVSGDRLVARNQDSASWGS LQNVQLTVNYPANG 81
      G+ + G+ D +A++ S ++ +
Sbjct 7 TVTLLGLFICCALVTSVYGGNDYLWGEIGPN DYHLAKDTVSKAFFVGLVQTKKYVFKQKN 66

Query 82 GYGA-VVSYSVILVDQTSNLGNGYVLYGGIGQRQIGILIEARNTYTFYSYIAEIIYG 135
      A +++ + + SN + GG G + I+ + + EI+G
Sbjct 67 DLNALTITAIKVTDKKSNGATAVLTSGGPGSKGATIVFTSERGSGIKDLVEIWG 121
```

> [gb|ACN69173.1|](#) hypothetical conserved secreted protein [Stomoxys calcitrans]  
Length=116

Score = 106 bits (264), Expect = 1e-21, Method: Composition-based stats.  
Identities = 19/114 (16%), Positives = 39/114 (34%), Gaps = 2/114 (1%)

```
Query 23 RANPGVTLTKLDNVRTARAIHNSLGQRVSGDRLVARNQDSASWGS LQNVQLTVNYPANGG 82
      + A S G+R S D L+ R + +N + V++P G
Sbjct 1 MKFLTSFCLIVSLATLWGAASASWGRN SSDLMLRENVVTRPIRNRNWSVNVDFPKPGQ 60

Query 83 YG-AVVSYSVILVDQTSNLGN-GYVLYGGIGQRQIGILIEARNTYTFYSYIAEIIY 134
      ++ + + T+ G + GG + + + + + EIY
Sbjct 61 INRRTITAI FVYDRFTNTSGAMP SLSWGGPYLTFANVNLRSQTSRGINSTVEIY 114
```

> [ref|XP\\_002107315.1|](#)  GD15631 [Drosophila simulans]  
[gb|EDX18297.1|](#)  GD15631 [Drosophila simulans]  
Length=163

[GENE ID: 6726355 Dsim\GD15631](#) | GD15631 gene product from transcript GD15631-RA  
[Drosophila simulans] (10 or fewer PubMed links)

Score = 104 bits (260), Expect = 3e-21, Method: Composition-based stats.

Identities = 48/134 (35%), Positives = 75/134 (55%), Gaps = 8/134 (5%)

```
Query 10 AKITLVEDVDFVRANPGVTLTKLDNVRT-----ARAIHNSLGQRVSGDRLVARNQDS 62
          I +V+D+ F PG+ + +++ ++ + ++G R+ D LVA+ ++
Sbjct 30 TGIRVVDDIHVFAAQYPGLQIQMEKEIVPGKARAGSQTVRYNMGARIPSDELVAQTANT 89

Query 63 ASWGSLQNVQLTVNYPANGGYGAVVSYVVSILVDQTSNLGNGYVLYGGIGQRQIGILIEAR 122
          + Q+V L + YP NG GA+VSYV +L Q + G YV+ GGIGQ I I++EAR
Sbjct 90 YEFPPRAQDVSLLQTYPENK-GAIVSYVELLCTQDTQEGTAYVVAGGIGQSLISIVLEAR 148

Query 123 NTTYTFSYIAEIIYGL 136
          NT FSY A YG+
Sbjct 149 NTKNFSYQALYYGI 162
```

>  [ref|ZP\\_05005660.1](#) conserved hypothetical protein [Streptomyces clavuligerus ATCC 27064]  
> [gb|EDY49959.1](#) conserved hypothetical protein [Streptomyces clavuligerus ATCC 27064]  
Length=125

Score = 104 bits (259), Expect = 3e-21, Method: Composition-based stats.  
Identities = 22/107 (20%), Positives = 43/107 (40%), Gaps = 3/107 (2%)

```
Query 30 LTKLDNVRTARAIHNSLGQRVSGDRLVARNQDSASWGSLQNVQLTVNYPANGGYGAVVSY 89
          A++ + +G R+ GDRLV S ++ V T + A + ++
Sbjct 19 TVPNAQRAAAQSHNLIIVGSRMPGDRLVLSQAVVKSSSWMRIVTETKTFQAP--HNERITL 76

Query 90 VSILVDQTSNLGN-GYVLYGGIGQRQIGILIEARNTTYTFSYIAEIIY 135
          V L +T G +L GG G + I +++ + ++ +Y
Sbjct 77 VEALDQRTDGTGAYASILNGGPGHNSVTIRFKSQRGHGIDFVVNLYA 123
```

>  [ref|XP\\_002101745.1](#)  GE17797 [Drosophila yakuba]  
> [gb|EDX02853.1](#)  GE17797 [Drosophila yakuba]  
Length=117

[GENE ID: 6525925 Dyak\GE17797](#) | GE17797 gene product from transcript GE17797-RA [Drosophila yakuba] (10 or fewer PubMed links)

Score = 103 bits (258), Expect = 4e-21, Method: Composition-based stats.  
Identities = 19/116 (16%), Positives = 40/116 (34%), Gaps = 3/116 (2%)

```
Query 23 RANPGVTLTKLDN--VRTARAIHNSLGQRVSGDRLVARNQDSASWGSLQNVQLTVNYPAN 80
          P + L L + T A G+ D +A++ S ++ + +
Sbjct 1 MKYPTIILFALAAFVLPFTAANDYLWGEVGENDYKLAKDTVSKAFFVGLVQTKKYVFKQS 60

Query 81 GGYGA-VVSYVVSILVDQTSNLGNGYVLYGGIGQRQIGILIEARNTTYTFSYIAEIIY 135
          A ++ + + + S+ ++ GG G + I + Y EI+G
Sbjct 61 DNLNALTITAIKVTDKSHGATAVLVSGGPGSKGATIKFTSERGYGIKDTVEIYG 116
```

>  [ref|XP\\_002028226.1](#)  GL16235 [Drosophila persimilis]  
> [gb|EDW38775.1](#)  GL16235 [Drosophila persimilis]  
Length=120

[GENE ID: 6603249 Dper\GL16235](#) | GL16235 gene product from transcript GL16235-RA [Drosophila persimilis] (10 or fewer PubMed links)

Score = 103 bits (258), Expect = 4e-21, Method: Composition-based stats.  
Identities = 26/109 (23%), Positives = 48/109 (44%), Gaps = 2/109 (1%)

```
Query 29 TLTKLDNVRTARAIHNSLGQRVSGDRLVARNQDSASWGSLQNVQLTVNYPANG-GYGAVV 87
          L V TA A+ ++ G + +L+ + + + V + YP NG G G ++
Sbjct 11 LLVVTSCVATAYAVSSTWGNISNSAQLLHAENVANASSPGRYVNHIEIKYPKNGIGNGRII 70

Query 88 SYVSILVDQTSNLGN-GYVLYGGIGQRQIGILIEARNTTYTFSYIAEIIY 135
          + + T+N G + GG G + I +++ Y + EIIY
Sbjct 71 TGIRAFDQVTNNTGGHATIYSGGPGFNFVHIKLSQYNYGLIFRVEIYG 119
```

>  [ref|XP\\_002039289.1](#)  GM22808 [Drosophila sechellia]  
> [gb|EDW56031.1](#)  GM22808 [Drosophila sechellia]  
Length=163

[GENE ID: 6614871 Dsec\GM22808](#) | GM22808 gene product from transcript GM22808-RA

[Drosophila sechellia] (10 or fewer PubMed links)

Score = 103 bits (257), Expect = 7e-21, Method: Composition-based stats.  
Identities = 49/134 (36%), Positives = 76/134 (56%), Gaps = 8/134 (5%)

```
Query 10 AKITLVEDVDEFVRANPGVTLTKLDNVRT-----ARAIHNSLGQRVSGDRLVARNQDS 62
          I +V+D+ F PG+ + +++ ++ + ++G R+ D LVA+ ++
Sbjct 30 TGIQVVDIIVFVAAQYPGLQIQQMEKEIVPGKARAGSQTVRYNMGARIPSDDELVAQTANT 89

Query 63 ASWGSLQNVQLTVNYPANGGYGAVVSVSILVDQTSNLGNGYVLYGGIGQRQIGILIEAR 122
          + Q+V L + YP NG GA+VSIV +L Q S+ G YV+ GGIGQ I I++EAR
Sbjct 90 YEFPPAQDVSLLQTYPENK-GAIVSYVDLLCTQDSSEGTAIVVAGGIGQSLISIVLEAR 148

Query 123 NTYTFSYIAEIIYGL 136
          NT FSY A YG+
Sbjct 149 NTKNFSYQALYYGI 162
```

>  [ref|XP\\_001959559.1](#)  GF11989 [Drosophila ananassae]

[gb|EDV36381.1](#)  GF11989 [Drosophila ananassae]  
Length=115

[GENE ID: 6494848 Dana\GF11989](#) | GF11989 gene product from transcript GF11989-RA  
[Drosophila ananassae] (10 or fewer PubMed links)

Score = 103 bits (256), Expect = 8e-21, Method: Composition-based stats.  
Identities = 20/114 (17%), Positives = 44/114 (38%), Gaps = 1/114 (0%)

```
Query 23 RANPGVTLTKLDNVRTARAIHNSLGQRVSGDRLVARNQDSASWGSLQNVQLTVNYPANGG 82
          + + L + A A + G+ + D + + + +NYPAG
Sbjct 1 MRSVLILSVLAVILGAHAYSATWGWKAKNTDYQLLHQVEIRYPIKNNYWNVNINYPASGV 60

Query 83 YGAVVSVSILVDQTSNLG-NGYVLYGGIGQRQIGILIEARNTYTFSYIAEIIYG 135
          +S + + + ++ G + + GG G R I +++++ + IYG
Sbjct 61 GYYNISAIYVDNFKNSSGASPTLYSGGPGYRFATINLKSQVNRGINSTVVIYG 114
```

>  [ref|XP\\_002076927.1](#)  GD24776 [Drosophila simulans]

[gb|EDX16521.1](#)  GD24776 [Drosophila simulans]  
Length=117

[GENE ID: 6740043 Dsim\GD24776](#) | GD24776 gene product from transcript GD24776-RA  
[Drosophila simulans] (10 or fewer PubMed links)

Score = 103 bits (256), Expect = 8e-21, Method: Composition-based stats.  
Identities = 17/117 (14%), Positives = 40/117 (34%), Gaps = 3/117 (2%)

```
Query 20 EFRANPGVTLTKLDNVRTARAIHNSLGQRVSGDRLVARNQDSASWGSLQNVQLTVNYP 79
          ++ + + T A G+ + D +A++ S ++ +
Sbjct 2 KYTTIILFALAAFV--LPTFAANDYLWGEVANDYKLAKDTVSKAFFVGLVQTKKYVFKQ 59

Query 80 NGGYGA-VVSVSILVDQTSNLGNGYVLYGGIGQRQIGILIEARNTYTFSYIAEIIYG 135
          + A ++ + I + S+ ++ GG G + I + Y EI+G
Sbjct 60 SDNLNALTITAIKITDKKKSHGATAVLVSGGPGSKGATIKFTSERGYGIKDTVEIWG 116
```

>  [ref|NP\\_001155164.1](#)  venom protein R [Nasonia vitripennis]  
Length=136

[GENE ID: 100120101 LOC100120101](#) | venom protein R [Nasonia vitripennis]

Score = 103 bits (256), Expect = 9e-21, Method: Composition-based stats.  
Identities = 17/102 (16%), Positives = 48/102 (47%), Gaps = 4/102 (3%)

```
Query 35 NVRTARAIHNSLGQRVSGDRLVARNQDSASWGSLQNVQLTVNYPANGGYGAVVSVSILV 94
          ++ + +G R +GDRLV + LQ +++ ++ G +++ + +
Sbjct 33 AAAPNKSHNLIIGNRQAGDRLVYQENIVKPSKWLQVIEVKKSFNITG---YLITQIRAMD 89

Query 95 DQTSNLGN-GYVLYGGIGQRQIGILIEARNTYTFSYIAEIIYG 135
          +T+ G + GG+G + + +++ ++ +++ +IY
Sbjct 90 QKTNGNGAIASRVDGGVGYSNVTLKFKSQRSHGINFVVQIYA 131
```

>  [ref|NP\\_001033839.1](#)  CG34026 [Drosophila melanogaster]

[gb|ABC67180.1](#)  CG34026 [Drosophila melanogaster]

[gb|ACD81771.1](#) **G** IP20615p [Drosophila melanogaster]  
Length=117

[GENE ID: 3885569 CG34026](#) | CG34026 gene product from transcript CG34026-RA  
[Drosophila melanogaster] (10 or fewer PubMed links)

Score = 102 bits (255), Expect = 1e-20, Method: Composition-based stats.  
Identities = 21/116 (18%), Positives = 42/116 (36%), Gaps = 3/116 (2%)

```
Query 23 RANPGVTLTKLDN--VRTARAIHNSLGQRVSGDRLVARNQDSASWGS LQNVQLTVNYPAN 80
          P + L L + T A G+ + D +A++ S ++ + +
Sbjct 1 MKYPTIILFALAAFILPTFAANDYLWGEV GADDDYQLAKDTVSKAFFVGLVQTKKYVFKQS 60

Query 81 GGYGA-VVSYVSILVDQTSNLGNGYVLYGGIGQRQIGILIEARNTYTF SYIAEIIYG 135
          A ++ + I + S+ ++ GG G + I + Y I EI+G
Sbjct 61 DNLNALTITAIKITDKKSHGATAVLVSGGPGSKGATIKFTSERGYGIKDIVEIIG 116
```

> [ref|ZP\\_05006207.1](#) conserved hypothetical protein [Streptomyces clavuligerus ATCC 27064]

[gb|EDY50506.1](#) conserved hypothetical protein [Streptomyces clavuligerus ATCC 27064]  
Length=125

Score = 102 bits (255), Expect = 1e-20, Method: Composition-based stats.  
Identities = 21/115 (18%), Positives = 44/115 (38%), Gaps = 3/115 (2%)

```
Query 22 VRANPGVTLTKLDNVRTARAIHNSLGQRVSGDRLVARNQDSASWGS LQNVQLTVNYPANG 81
          A++ + +G R+ GDRLV + ++ V T + A
Sbjct 11 ASTATVADTVPNAQRAAAQSHNLIVGSRMPGDRLVLSQAVVKNSSW MRIVTETKTFQAP- 69

Query 82 GYGAVVSYVSILVDQTSNLGN-GYVLYGGIGQRQIGILIEARNTYTF SYIAEIIYG 135
          + ++ V L +T G +L GG G + I +++ ++ ++ +Y
Sbjct 70 -HNERITLVEALDQRTDGTGAYASILNGGPGHNSVTIRFKSQRSHGIDFVVNL YA 123
```

> [ref|XP\\_001868961.1](#) **UG** 14.5 kDa salivary protein [Culex quinquefasciatus]

[gb|EDS28048.1](#) **G** 14.5 kDa salivary protein [Culex quinquefasciatus]  
Length=153

[GENE ID: 6052742 CpipJ\\_CPIJ018793](#) | 14.5 kDa salivary protein  
[Culex quinquefasciatus]

Score = 102 bits (254), Expect = 1e-20, Method: Composition-based stats.  
Identities = 63/136 (46%), Positives = 93/136 (68%), Gaps = 2/136 (1%)

```
Query 1 TAPDPETVSAKITLVEDVDEFVRANPGVTLTKLDNVRTA-RAIHNSLGQRVSGDRLVARN 59
          + P + A + +V+++ F ANP + L LD R+ + I S+G R+SGDRLVA +
Sbjct 18 SDEQPAAIEAHVEIVQNIGAFKAANPDLELVPLDITRSTRQQIVYVSGNRISGDRLVAAD 77

Query 60 QDSASWGS LQNVQLTVNYPANGGYGAVVSYVSILVDQTSNLGNGYVLYGGIGQRQIGILI 119
          + SW SLQ+V LT+NYP +G GAVV+YV ++V+Q+SN G GY+ GGIGQR+I ++I
Sbjct 78 SNGQSWSSLQDVALTLNYP RSG-TGAVVTVYQVVVNQSSNQGRGYITAGGIGQRRITLVI 136

Query 120 EARNTYTF SYIAEIIYG 135
          EA +T F+Y A+I+G
Sbjct 137 EAYSTNYFN YNAQIFG 152
```

> [ref|XP\\_001868962.1](#) **UG** conserved hypothetical protein [Culex quinquefasciatus]

[gb|EDS28049.1](#) **G** conserved hypothetical protein [Culex quinquefasciatus]  
Length=153

[GENE ID: 6052738 CpipJ\\_CPIJ018794](#) | hypothetical protein  
[Culex quinquefasciatus]

Score = 102 bits (254), Expect = 1e-20, Method: Composition-based stats.  
Identities = 65/136 (47%), Positives = 94/136 (69%), Gaps = 2/136 (1%)

```
Query 1 TAPDPETVSAKITLVEDVDEFVRANPGVTLTKLDNVRTA-RAIHNSLGQRVSGDRLVARN 59
          + P + A + +V+++ F ANP V L LD R+ + I S+G R+SGDRLVA +
Sbjct 18 SDEQPAAIEAYVEIVQNIGAFKAANPDVELVPLDITRSTRQQIVYVSGNRISGDRLVAAD 77

Query 60 QDSASWGS LQNVQLTVNYPANGGYGAVVSYVSILVDQTSNLGNGYVLYGGIGQRQIGILI 119
          ++ SW SLQ+V LT+NYP +G GAVV+YV ++V+Q+SN G GY+ GGIGQR+I ++I
Sbjct 78 SNAQSWSSLQDVALTLNYP RSG-TGAVVTVYQVVVNQSSNQGRGYITAGGIGQRRITLVI 136
```

Query 120 EARNTYTFYSYIAEIIYG 135  
EA +T F+Y A+IYG  
Sbjct 137 EAYSTNYFNNAQIIYG 152

> [ref|XP\\_002063499.1|](#)  GK21944 [Drosophila willistoni]  
[gb|EDW74485.1|](#)  GK21944 [Drosophila willistoni]  
Length=112

[GENE ID: 6640573 Dwil\GK21944](#) | GK21944 gene product from transcript GK21944-RA [Drosophila willistoni] (10 or fewer PubMed links)

Score = 102 bits (254), Expect = 1e-20, Method: Composition-based stats.  
Identities = 25/109 (22%), Positives = 46/109 (42%), Gaps = 2/109 (1%)

Query 29 TLTKLDNVRTARAIHNSLGQRVSGDRLVARNQDSASWGLQNVQLTVNYPANG-GYGAVV 87  
L V TA A+ ++ G + +L+ + + + YP NG G G ++  
Sbjct 3 VLLVASCVATAYAVSSTWGNISNSAQLLHAENVVNASSPGKYAHHEIKYPKNGIGNGRII 62  
Query 88 SYVSILVDQTSNLGN-GYVLYGGIGQRQIGILIEARNTYTFYSYIAEIIYG 135  
+ + T+N G + GG G + I +++++ Y + EIIYG  
Sbjct 63 TGIRAFDQVTNNTGGHATIIYSGGPGFNFVHIKLSQYNYGLIFRVEIYG 111

> [ref|XP\\_001865641.1|](#)  conserved hypothetical protein [Culex quinquefasciatus]  
[gb|EDS42031.1|](#)  conserved hypothetical protein [Culex quinquefasciatus]  
Length=102

[GENE ID: 6048772 CpipJ\\_CPIJ015172](#) | hypothetical protein [Culex quinquefasciatus]

Score = 101 bits (252), Expect = 2e-20, Method: Composition-based stats.  
Identities = 19/99 (19%), Positives = 40/99 (40%), Gaps = 3/99 (3%)

Query 40 RAIHNSLGQRVSGDRLVARNQDSASW--GSLQNVQLTVNYPANGGYGAVVSIVSILVDQT 97  
+ + S G R D L++R + + + YP G G ++ +++++  
Sbjct 3 KQHNFSGWVRGPYDVLRSRTTILEPPARSPYRTRTVNLYYPEKQPGRITIAAINVIDGFG 62  
Query 98 SNLGN-GYVLYGGIGQRQIGILIEARNTYTFYSYIAEIIYG 135  
G + GG+GQ + + ++ ++ EIIYG  
Sbjct 63 DGTGGTARLWSGGLGQNSTTVRLRSQRGRGLNFTVEIYG 101

> [ref|XP\\_001975824.1|](#)  GG22532 [Drosophila erecta]  
[gb|EDV56224.1|](#)  GG22532 [Drosophila erecta]  
Length=112

[GENE ID: 6549590 Dere\GG22532](#) | GG22532 gene product from transcript GG22532-RA [Drosophila erecta] (10 or fewer PubMed links)

Score = 101 bits (252), Expect = 2e-20, Method: Composition-based stats.  
Identities = 24/98 (24%), Positives = 42/98 (42%), Gaps = 4/98 (4%)

Query 39 ARAIHNSLGQRVSGDRLVARNQDSASWGLQNVQLTVNYPANGGYGAVVSIVSILVDQTS 98  
A + G+RV+ D L++R + + L VNYP A +S V + + +  
Sbjct 17 CHAYSATWGRRVNNDVLLSRTNEVRNPIKNNYWNLNVNYP A---GFYNISAVIVYDNFKN 73  
Query 99 NLG-NGYVLYGGIGQRQIGILIEARNTYTFYSYIAEIIYG 135  
N G + + GG G R + + + + EI+G  
Sbjct 74 NSGASPSLYSGGPGYRFATVNLRGQVNRGINSTVEIWG 111

> [ref|XP\\_001987095.1|](#)  GH21729 [Drosophila grimshawi]  
[gb|EDW01962.1|](#)  GH21729 [Drosophila grimshawi]  
Length=120

[GENE ID: 6560516 Dgri\GH21729](#) | GH21729 gene product from transcript GH21729-RA [Drosophila grimshawi] (10 or fewer PubMed links)

Score = 101 bits (252), Expect = 2e-20, Method: Composition-based stats.  
Identities = 23/116 (19%), Positives = 48/116 (41%), Gaps = 2/116 (1%)

Query 22 VRANPGVTLTKLDNVRTARAIHNSLGQRVSGDRLVARNQDSASWGLQNVQLTVNYPANG 81  
+ + V A ++ ++ G + +L+ + + V+ + YP NG  
Sbjct 4 TVVAIVPLVFFIWFVAPALSVSSTWGNISNSAQLLHAENVAQGSSEPKYVEDEIKYPTNG 63

Query 82 -GYGAVVSYVSVILVDQTSNLGN-GYVLYGGIGQRQIGILIEARNTYTFYSYIAEIIYG 135  
G G +++ + T+N G + GG G + I +++ Y + EIIYG  
Sbjct 64 IGNRIITGIRAFDQVTNNTGGHATIIYSGGPGFNFVHIKLSQYNYGLIFRVEIIYG 119

>  [ref|XP\\_001865369.1](#)  conserved hypothetical protein [Culex quinquefasciatus]  
[gb|EDS41618.1](#)  conserved hypothetical protein [Culex quinquefasciatus]  
Length=118

[GENE ID: 6048450 CpipJ\\_CPIJ014861](#) | hypothetical protein  
[Culex quinquefasciatus]

Score = 101 bits (252), Expect = 3e-20, Method: Composition-based stats.  
Identities = 29/119 (24%), Positives = 51/119 (42%), Gaps = 6/119 (5%)

Query 20 EFVVRANPGVTLTKLDNVRTARAIHNSLGQRVSGDRLVARNQDSASWGSLLQNVQLTVNY-P 78  
+F+ A+ + L + A + G+RV GDRL+ R + + V Y P  
Sbjct 2 KFLLASATL-LAIFAVLILADSN--QWGRRVPGDRLNRTTVVNNSLPIPIKTAVVQYLP 58  
Query 79 ANGGYGAVVSYVSVILVDQTS--NLNGYVLYGGIGQRQIGILIEARNTYTFYSYIAEIIYG 135  
G V+Y+ + + G ++ GGI Q + + +R + F++ EIIYG  
Sbjct 59 PPGVRPPNVTVIVARDNVKPNPGQGLAALISGGINQTHATVKLSSRPSLGFNFVTEIIYG 117

>  [ref|XP\\_002041778.1](#)  GM11373 [Drosophila sechellia]  
[gb|EDW45626.1](#)  GM11373 [Drosophila sechellia]  
Length=117

[GENE ID: 6617461 Dsec\GM11373](#) | GM11373 gene product from transcript GM11373-RA  
[Drosophila sechellia] (10 or fewer PubMed links)

Score = 101 bits (251), Expect = 3e-20, Method: Composition-based stats.  
Identities = 17/117 (14%), Positives = 39/117 (33%), Gaps = 3/117 (2%)

Query 20 EFVVRANPGVTLTKLDNVRTARAIHNSLGQRVSGDRLVARNQDSASWGSLLQNVQLTVNYP 79  
++ + + T A G+ D +A++ S ++ +  
Sbjct 2 KYTTIILFALAAFV--LPTFAANDYLWGEVGVNDYKLAKDTVSKAFFVGLVQTKKYVFKQ 59  
Query 80 NGGYGA-VVSYVSVILVDQTSNLNGYVLYGGIGQRQIGILIEARNTYTFYSYIAEIIYG 135  
+ A +++ I + S+ ++ GG G + I + Y EI+G  
Sbjct 60 SDNLNALTITAIKITDKRKSHGATAVLVSGGPGSKGATIKFTSERGYGIKDTVEIHWG 116

>  [ref|XP\\_001664100.1](#)  hypothetical protein AaeL\_AAEL013895 [Aedes aegypti]  
[gb|EAT33832.1](#)  conserved hypothetical protein [Aedes aegypti]  
Length=155

[GENE ID: 5578892 AaeL\\_AAEL013895](#) | hypothetical protein [Aedes aegypti]  
(10 or fewer PubMed links)

Score = 101 bits (251), Expect = 4e-20, Method: Composition-based stats.  
Identities = 58/135 (42%), Positives = 83/135 (61%), Gaps = 5/135 (3%)

Query 2 APDPETVSAKITLVEDVDEFVVRANPGVTLTKLDNVRTARAIHNSLGQRVSGDRLVARNQD 61  
A + +SA I ++V F N + + + + +LGQRV GDRLV+ D  
Sbjct 26 ADVSDQISATIEAEKNVGVFTVGNQL---PGPSGKVGQQLVYTLGQRVVGDRVLVSTKSD 81  
Query 62 SASWGSLLQNVQLTVNYPANGGYGAVVSYVSVILVDQTSNLNGYVLYGGIGQRQIGILIEA 121  
S W +LQ+V L++ YP +G GAVV+YV ++V Q+SNLG GYV+ GGIGQR I + IEA  
Sbjct 82 SKQWPTLQDVTLSLAYPQSG-VGAVVTVYVQVIVKQSSNLGKGYVVS GGIGQRFIHLNIEA 140  
Query 122 RNTYTFYSYIAEIIYGL 136  
+T F+Y +I+GL  
Sbjct 141 YSTNYFTYTVQIFGL 155

>  [gb|ABH10141.1](#) HMG176 [Helicoverpa armigera]  
[gb|ABK29472.1](#) HMG176 [Helicoverpa armigera]  
Length=176

Score = 100 bits (249), Expect = 5e-20, Method: Composition-based stats.  
Identities = 27/127 (21%), Positives = 49/127 (38%), Gaps = 7/127 (5%)

Query 9 SAKITLVEDVDEFVVRANPGVTLTKLDNVRTARAIHNSLGQRVSGDRLVARNQDSASWGSLL 68  
A + ++ F+ V L + A SLG + DRL++ + S + +



Sbjct 44 DADEVPMSEMAVITK---VLLADEEMPFVAPRSGMSLGNIGASDRLLSASTHSRNP IAN 100  
Query 69 QNVQLTVNYPANGGYGAVVSYVLSILVDQTSNLGNGYVLYGGIGQRQIGILIEARNTYTF 128  
Q + V Y G ++ V + V+ G +G+ I I +++ F  
Sbjct 101 QVQTVNVRYS--GSSSIILAVRAY--GSGQGATARVVEGYLGRNSITIQLSARGRGFH 156  
Query 129 YIAEYIG 135  
Y EI+G  
Sbjct 157 YRIEIWG 163

>  [gb|ABV44709.1](#) 18 kDa midgut protein [Phlebotomus papatasi]  
Length=161

Score = 100 bits (249), Expect = 6e-20, Method: Composition-based stats.  
Identities = 50/136 (36%), Positives = 70/136 (51%), Gaps = 2/136 (1%)

Query 2 APDPETVSAKITLVEDVDFVRANPGVTLTKLDNVRTARA-IHNSLGQRVSGDRLVARNQ 60  
D + V ++ +FV NP L + R I+ LG R GDRLV  
Sbjct 27 DDDAPDSNVNFLSVNNLADFVAENPEAELEMMHMYSDYRGQINYLGRARQGDRLVGTAS 86  
Query 61 DSASWGS LQNVQLTVNYPANGGYGAVVSYVLSILVDQTSNLGNGYVLYGGIGQRQIGILIE 120  
+ W QNV ++ YP G GA+V+YVS+ + Q++NLG YV GGI QR I I++E  
Sbjct 87 NGQRWRPQNVNDIEIKYPTKG-RGALVTYVSLNITQSTNLGRAYVTKGGIHRNITIVVE 145  
Query 121 ARNTYTF SYIAEYIGL 136  
A +T YI I+G+  
Sbjct 146 AYSTTFVHYICNIFGM 161

>  [ref|XP\\_001604583.1](#)  PREDICTED: hypothetical protein [Nasonia vitripennis]  
Length=129

[GENE ID: 100120995 LOC100120995](#) | hypothetical protein LOC100120995  
[Nasonia vitripennis]

Score = 100 bits (248), Expect = 6e-20, Method: Composition-based stats.  
Identities = 22/104 (21%), Positives = 51/104 (49%), Gaps = 3/104 (2%)

Query 33 LDNVRTARAIHNSLGQRVSGDRLVARNQDSASWGS LQNVQLTVNYPANGGYGAVVSYVSI 92  
+++ +++ H +G RV GDRL+ R + + V+ T +P G + ++ +  
Sbjct 26 VNSTNNSKSHHLIIGSRVWGDRLLRVHVQKDYSWFRVVKETRTFP--GDGISKITEIQA 83  
Query 93 LVDQTSNLGN-GYVLYGGIGQRQIGILIEARNTYTF SYIAEYIG 135  
L ++ G ++ GG Q + + +++ + + ++ EYIG  
Sbjct 84 LDQRSDRSGADVALINGGPDQTFVTLQFKSQRQSIDSFVVEIYG 127

>  [ref|XP\\_002016257.1](#)  GL10590 [Drosophila persimilis]

[gb|EDW32147.1](#)  GL10590 [Drosophila persimilis]  
Length=116

[GENE ID: 6591103 Dper\GL10590](#) | GL10590 gene product from transcript GL10590-RA  
[Drosophila persimilis] (10 or fewer PubMed links)

Score = 100 bits (248), Expect = 7e-20, Method: Composition-based stats.  
Identities = 19/115 (16%), Positives = 40/115 (34%), Gaps = 2/115 (1%)

Query 23 RANPGVTLTKLDNVRTARAIHNSLGQRVSGDRLVARNQDSASWGS LQNVQLTVNYPANGG 82  
+ + S G+R + D L++R + S + V++P  
Sbjct 1 MKLLLCLTILVAEIFVHVGSSVSWGRKNNDFLLSRQVEVRS AIKNNFWNIDVDFPRADT 60  
Query 83 YG-AVVSYSILVDQTSNLGN-GYVLYGGIGQRQIGILIEARNTYTF SYIAEYIG 135  
+S + + + ++ G + GG G R + + + + EYIG  
Sbjct 61 ENYYKISAI FVYDNFKNSTGAVPGLWAGGPGYRFAQVNLRSFVNVGLNSTIEIYG 115

>  [ref|XP\\_001965768.1](#)  GF20010 [Drosophila ananassae]

[gb|EDV41416.1](#)  GF20010 [Drosophila ananassae]  
Length=117

[GENE ID: 6502742 Dana\GF20010](#) | GF20010 gene product from transcript GF20010-RA  
[Drosophila ananassae] (10 or fewer PubMed links)

Score = 100 bits (248), Expect = 7e-20, Method: Composition-based stats.  
Identities = 18/115 (15%), Positives = 42/115 (36%), Gaps = 1/115 (0%)

Query 22 VRANPGVTLTKLDNVRTARAIHNSLGQRVSGDRLVARNQDSASWGS LQNVQLTVNYPANG 81  
 V + + + G+ D ++A+++ S ++ +  
 Sbjct 2 KSRLIFVLAITAYIIPSFANNNYLWGEISGNDYILAKDKVSKAFFVGLVQTKKYVFKQKD 61

Query 82 GYGA-VVSVYSILVDQTSNLGNGYVLYGGIGQRQIGILIEARNTYTF SYIAE IYG 135  
 A ++ + I + N +L GG G + IL +++ Y + + EI+G  
 Sbjct 62 NLNALTITAIKITDKKEKNGATAELLSGGPGSKGATILFQSKRGYGINDDVVEIWG 116

> [ref|XP\\_001649836.1|](#) **UG** hypothetical protein AaeL\_AAEL004809 [Aedes aegypti]  
[gb|ABF18045.1|](#) putative secreted salivary protein [Aedes aegypti]  
[gb|EAT43758.1|](#) **G** conserved hypothetical protein [Aedes aegypti]  
 Length=155

[GENE ID: 5565507 AaeL\\_AAEL004809](#) | hypothetical protein [Aedes aegypti]  
 (10 or fewer PubMed links)

Score = 99.6 bits (247), Expect = 8e-20, Method: Composition-based stats.  
 Identities = 58/135 (42%), Positives = 83/135 (61%), Gaps = 5/135 (3%)

Query 2 APPPETVSAKITLVEDVDEFVRANPGVTLTKLDNVRTARAIHNSLGQRVSGDRLVARNQD 61  
 A + +SA I ++V F N + + + + +LGQRV GDRLV+ D  
 Sbjct 26 ADVSDQISATIEAEKNVGVFTVGNQL----PGPSGKVGQQLVYTLGQRVVGDRVLVSTKSD 81

Query 62 SASWGS LQNVQLTVNYPANGGYGAVVSVYSILVDQTSNLGNGYVLYGGIGQRQIGILIEA 121  
 S W +LQ+V L++ YP +G GAVV+YV ++V Q+SNLG GYV+ GGIGQR I + IEA  
 Sbjct 82 SKQWPTLQDVTLSLAYPQSG-VGAVVTVYVQVIVKQSSNLGKGYVVS GGIGQRFIHLNIEA 140

Query 122 RNTYTF SYIAE IYGL 136  
 +T F+Y +I+GL  
 Sbjct 141 YSTNYFTYTVQIFGL 155

> [ref|XP\\_001604165.1|](#) **UG** PREDICTED: hypothetical protein [Nasonia vitripennis]  
 Length=119

[GENE ID: 100120529 LOC100120529](#) | hypothetical protein LOC100120529  
 [Nasonia vitripennis]

Score = 99.6 bits (247), Expect = 9e-20, Method: Composition-based stats.  
 Identities = 21/96 (21%), Positives = 42/96 (43%), Gaps = 3/96 (3%)

Query 41 AIHNSLGQRVSGDRLVARNQDSASWGS LQNVQLTVNYPANGGYGAVVSVYSILVDQTSNL 100  
 +G R GD L+ R + L++V+LT + G + ++ V +L  
 Sbjct 25 PNSLIVGDREPGDHLMQREFVMKGYKWLRSVKLTKTFT--GSVHSKITQVQLLDQNEKGN 82

Query 101 G-NGYVLYGGIGQRQIGILIEARNTYTF SYIAE IYG 135  
 G +L GG G + + ++ + +Y+ ++YG  
 Sbjct 83 GATAAILSGPGDNFVTVQFKSVRGHGVNYYVVKLYG 118

> [ref|XP\\_001599861.1|](#) **UG** PREDICTED: similar to CG34026-PA [Nasonia vitripennis]  
 Length=116

[GENE ID: 100117346 LOC100117346](#) | similar to CG34026-PA [Nasonia vitripennis]

Score = 99.2 bits (246), Expect = 1e-19, Method: Composition-based stats.  
 Identities = 20/115 (17%), Positives = 34/115 (29%), Gaps = 2/115 (1%)

Query 22 VRANPGVTLTKLDNVRTARAIHNSLGQRVSGDRLVARNQDSASWGS LQNVQLTVNYPANG 81  
 + T +G V+GDRL+ + G  
 Sbjct 2 TSQYVFILAVFATLAVTFANNDLIIGDHVAGDRLLQLEHIEKDAAWWGEKGS-ITRTFEG 60

Query 82 GYGAVVSVYSILVDQTSN-LGNGYVLYGGIGQRQIGILIEARNTYTF SYIAE IYG 135  
 A ++ V L + ++ GG+G + I + +I EIYG  
 Sbjct 61 DTFAKITMVRALDKHDNGHGATAEIIAGGVGHSYVTIKFVSRRLRGIDFIVEIYG 115

> [ref|XP\\_002028229.1|](#) **G** GL16227 [Drosophila persimilis]  
[gb|EDW38778.1|](#) **G** GL16227 [Drosophila persimilis]  
 Length=123

[GENE ID: 6603243 Dper\GL16227](#) | GL16227 gene product from transcript GL16227-RA  
 [Drosophila persimilis] (10 or fewer PubMed links)

Score = 99.2 bits (246), Expect = 1e-19, Method: Composition-based stats.  
Identities = 17/117 (14%), Positives = 40/117 (34%), Gaps = 2/117 (1%)

```
Query 20 EFVVRANPGVTLTKLDNVRTARAIHNSLGQRVSGDRLVARNQDSASWGS LQNVQLTVNYP A 79
          FV      +          + G+ + D +A++ ++          +
Sbjct 7 AFVVTVAFILFVFAFH-EPVCATNNYLWGEIGANDYKLA KDTVKKAFVGLVQTKKYVFKQ 65

Query 80 NGGYGA-VVSYVSVILVDQTSNLGNGYVLYGGIGQRQIGILIEARN TYTFSYIAEIYG 135
          + A ++ + I + +N ++ GG G + IL + Y + + EI+G
Sbjct 66 SDNLDAL TITAIQITDKKKNGGATAELISGGPGSKGATILFNSVRGYGINDVVEIWG 122
```

>  [ref|XP\\_002099025.1](#)  Acp225 [Drosophila yakuba]  
[gb|EDW98737.1](#)  Acp225 [Drosophila yakuba]  
Length=120

[GENE ID: 6538503 Dyak\Acp225](#) | GE10689 gene product from transcript GE10689-RA [Drosophila yakuba] (10 or fewer PubMed links)

Score = 99.2 bits (246), Expect = 1e-19, Method: Composition-based stats.  
Identities = 19/112 (16%), Positives = 38/112 (33%), Gaps = 3/112 (2%)

```
Query 23 RANPGVTLTKLDNVRTARAIHNSLGQRVSGDRLVARNQDSASWGS LQNVQLTVNYPANGG 82
          + L+          + G GD+L+ + + + L+ V V++
Sbjct 8 IFVAVAIVAVLNVAFAGHDGSTTFGLVKPGDKLIHKEEI VEAKKFLRVVTRKVVHFKPQ-- 65

Query 83 YGAVVSYVSVILVDQTSNLGNGYVLYGGIGQRQIGILIEARN TYTFSYIAEIY 134
          +S + I S G +L GG + I + + ++ EIY
Sbjct 66 -PYKLSAIVITDHSESKGGTASLLEGGPPGKFAVIGFRSDRNHGLNFTLEIY 116
```

>  [gb|ABW82136.2](#) IP21714p [Drosophila melanogaster]  
Length=131

Score = 98.8 bits (245), Expect = 1e-19, Method: Composition-based stats.  
Identities = 19/117 (16%), Positives = 34/117 (29%), Gaps = 1/117 (0%)

```
Query 19 DEFVRANPGVTLTKLDNVRTARAIHNSLGQRVSGDRLVARNQDSASWGS LQNVQLTVNYP 78
          F+          N +          + G + + D L+A + S L T
Sbjct 14 GVFLLLVGTHVCFIDANFGSGEGNDYTYGTQATTD TLIASETITKSKSLLGITT KTYTLT 73

Query 79 ANGGYGAVVSYVSVILVDQTSNLGNGYVLYGGIGQRQIGILIEARN TYTFSYIAEIYG 135
          G ++Y+ I +          + GG+G + I + IYG
Sbjct 74 QAG-TAKTITYIKITDLKMRGATAEITSGGVGSTTVTIKFTSARGAGIKSQVVIYG 129
```

>  [gb|ACD99549.1](#) IP21514p [Drosophila melanogaster]  
[gb|ACD99554.1](#) IP21614p [Drosophila melanogaster]  
Length=129

Score = 98.8 bits (245), Expect = 2e-19, Method: Composition-based stats.  
Identities = 19/117 (16%), Positives = 34/117 (29%), Gaps = 1/117 (0%)

```
Query 19 DEFVRANPGVTLTKLDNVRTARAIHNSLGQRVSGDRLVARNQDSASWGS LQNVQLTVNYP 78
          F+          N +          + G + + D L+A + S L T
Sbjct 12 GVFLLLVGTHVCFIDANFGSGEGNDYTYGTQATTD TLIASETITKSKSLLGITT KTYTLT 71

Query 79 ANGGYGAVVSYVSVILVDQTSNLGNGYVLYGGIGQRQIGILIEARN TYTFSYIAEIYG 135
          G ++Y+ I +          + GG+G + I + IYG
Sbjct 72 QAG-TAKTITYIKITDLKMRGATAEITSGGVGSTTVTIKFTSARGAGIKSQVVIYG 127
```

>  [ref|XP\\_001865640.1](#)  hypothetical protein CpipJ\_CPIJ015171 [Culex quinquefasciatus]  
[gb|EDS42030.1](#)  hypothetical protein CpipJ\_CPIJ015171 [Culex quinquefasciatus]  
Length=128

[GENE ID: 6048771 CpipJ\\_CPIJ015171](#) | hypothetical protein [Culex quinquefasciatus]

Score = 98.5 bits (244), Expect = 2e-19, Method: Composition-based stats.  
Identities = 28/120 (23%), Positives = 45/120 (37%), Gaps = 5/120 (4%)

```
Query 20 EFVVRANPGVTLTKLDNVRTARAIHNSLGQRVSGDRLVARNQDS A----SWGS LQNVQLTV 75
          +F+ +          + +R G R D L+ SW S + V T+
Sbjct 2 KFLVFAIVLISFSALALTQSRQNTIRWGNRQSDV LIGHYVAIKKAKSSWFSKAVNQTL 61
```

Query 76 NYPANGGYGAVVSYVLSILVDQTSNLGNGYVLYGGIGQRQIGILIEARNTYTFYSYIAEIIYG 135  
YPA G G +S + N +L GGIG+ IL+ ++ + E+YG  
Sbjct 62 QYPAMGQLGRNISAIYFYE-APKGRANPKLLSGGIGRNYTTILLTSQKGGQLNVTVELYG 120

>  [gb|AC072873.1](#) MIP04578p [Drosophila melanogaster]  
Length=118

Score = 98.5 bits (244), Expect = 2e-19, Method: Composition-based stats.  
Identities = 24/116 (20%), Positives = 45/116 (38%), Gaps = 4/116 (3%)

Query 21 FVRANPGVTLTKLDNVRTARAIHNSLGQRVSGDRLVARNQDSASWGS LQNVQLTVNYPAN 80  
F + L + A + G+RV+ D L++R ++ + + VNYP  
Sbjct 5 FNMRLLLILSVLAVILGCHAYSATWGRRVNNDFFLSRTREVRNPIKNNYWNVNVNYP-- 62

Query 81 GGYGAVVSYVLSILVDQTSNLG-NGYVLYGGIGQRQIGILIEARNTYTFYSYIAEIIYG 135  
+S V + + +N G + + GG G R + + + EI+G  
Sbjct 63 -NGFYNISAVIVYDNFKNSGASPSLYSGGPGYRFATVNLRGQVNRGIDSTVEIWG 117

>  [ref|XP\\_001599834.1](#)  PREDICTED: similar to putative salivary secreted peptide [Nasonia vitripennis]  
Length=125

[GENE ID: 100118223](#) [LOC100118223](#) | similar to putative salivary secreted peptide [Nasonia vitripennis]

Score = 98.5 bits (244), Expect = 2e-19, Method: Composition-based stats.  
Identities = 19/101 (18%), Positives = 40/101 (39%), Gaps = 2/101 (1%)

Query 36 VRTARAIHNSLGQRVSGDRLVARNQDSASWGS LQNVQLTVNYPANGGYGAVVSYVLSILVD 95  
+ + G R+ GDRL+ R + + +T+ G + +S + L  
Sbjct 25 LAASLPNDVIAGSRIPGDRLIQREEVKKDANVWGMK-VTITKTFEGDKYSKISQLRALDQ 83

Query 96 QTSN-LGNGYVLYGGIGQRQIGILIEARNTYTFYSYIAEIIYG 135  
++ ++ GG+G + I E+ ++ E+YG  
Sbjct 84 HSNHGATAKIIAGGVGFSYVTIKFESERFRGIDFVVELYG 124

>  [gb|ABD97958.1](#) ACP225 [Drosophila yakuba]  
Length=121

Score = 98.1 bits (243), Expect = 2e-19, Method: Composition-based stats.  
Identities = 18/112 (16%), Positives = 37/112 (33%), Gaps = 2/112 (1%)

Query 23 RANPGVTLTKLDNVRTARAIHNSLGQRVSGDRLVARNQDSASWGS LQNVQLTVNYPANGG 82  
+ L+ + G G +L+ + + + L+ V V++  
Sbjct 8 IFVAIAIVAVLNVAFAFGHDGSTTFVGLKPGAKLIHKEEIVEAKKFLRVVTRKVFH--KPQ 65

Query 83 YGAVVSYVLSILVDQTSNLGNGYVLYGGIGQRQIGILIEARNTYTFYSYIAEIIY 134  
+S + I S G +L GG + I + + ++ EIY  
Sbjct 66 QPYKLSAIVITDSESKGGTASLLEGGPPGKFAVIGFRSDRNHGLNFTLEIY 117

>  [gb|ABD97961.1](#) ACP225 [Drosophila yakuba]  
Length=121

Score = 98.1 bits (243), Expect = 3e-19, Method: Composition-based stats.  
Identities = 18/112 (16%), Positives = 37/112 (33%), Gaps = 2/112 (1%)

Query 23 RANPGVTLTKLDNVRTARAIHNSLGQRVSGDRLVARNQDSASWGS LQNVQLTVNYPANGG 82  
+ L+ + G G +L+ + + + L+ V V++  
Sbjct 8 IFVAIAIVAVLNVAFAFGHDGSTTFVGLKPGAKLIHKEEIVEAKKFLRVVTRKVFH--KPQ 65

Query 83 YGAVVSYVLSILVDQTSNLGNGYVLYGGIGQRQIGILIEARNTYTFYSYIAEIIY 134  
+S + I S G +L GG + I + + ++ EIY  
Sbjct 66 QPYKLSAIVITDSESKGGTASLLEGGPPGKFAVIGFRSDRNHGLNFTLEIY 117

>  [gb|ABD97965.1](#) ACP225 [Drosophila yakuba]  
Length=121

Score = 97.7 bits (242), Expect = 3e-19, Method: Composition-based stats.  
Identities = 19/112 (16%), Positives = 38/112 (33%), Gaps = 2/112 (1%)

Query 23 RANPGVTLTKLDNVRTARAIHNSLGQRVSGDRLVARNQDSASWGS LQNVQLTVNYPANGG 82

+ L+ V                  + G          G +L+ + + + L+ V V++  
Sbjct 8 IFVAIAIVAVLNNVFAGHDGTTTFGVLKPGAKLIHKKEEIVEAKKFLRVVTRKRVHF--KPQ 65  
Query 83 YGAVVSYVSIILVDQTSNLGNGYVLYGGIGQRQIGILIEARNNTYTFYSYIAEY 134  
                  +S + I          S G +L GG + I + + ++ EIY  
Sbjct 66 QPYKLSAIVITDHSKGGTASLLEGGPPGKFAVIGFRSDRNHGLNFTLEIY 117

>  [gb|ABD97960.1](#) ACP225 [Drosophila yakuba]  
Length=121

Score = 97.7 bits (242), Expect = 3e-19, Method: Composition-based stats.  
Identities = 19/112 (16%), Positives = 37/112 (33%), Gaps = 2/112 (1%)

Query 23 RANPGVTLTKLDNVRTARAIHNSLGQRVSGDRLVARNQDSASWGSQVQLTVNYPANGG 82  
                  + L+                  + G          G +L+ + + + L+ V V+Y  
Sbjct 8 IFVAIAIVAVLNVAFAFHGDGTTTFGVLKPGAKLIHKKEEIVEAKKFLRVVTRKRVHY--KPQ 65  
Query 83 YGAVVSYVSIILVDQTSNLGNGYVLYGGIGQRQIGILIEARNNTYTFYSYIAEY 134  
                  +S + I          S G +L GG + I + + ++ EIY  
Sbjct 66 QPYKLSAIVITDHSKGGTASLLEGGPPGKFAVIGFRSDRNHGLNFTLEIY 117

>  [ref|NP\\_726308.1](#)  CG30413 [Drosophila melanogaster]  
[gb|AAM68241.1](#)  CG30413 [Drosophila melanogaster]  
Length=122

[GENE ID: 246601 CG30413](#) | CG30413 gene product from transcript CG30413-RA  
[Drosophila melanogaster] (10 or fewer PubMed links)

Score = 97.7 bits (242), Expect = 4e-19, Method: Composition-based stats.  
Identities = 19/117 (16%), Positives = 34/117 (29%), Gaps = 1/117 (0%)

Query 19 DEFVRANPGVTLTKLDNVRTARAIHNSLGQRVSGDRLVARNQDSASWGSQVQLTVNYP 78  
                  F+                  N +                  + G + + D L+A + S L T  
Sbjct 5 GVFLLLVGTHVCFIDANFGSGEGNDYTYGTQATTDTLIASETITKSKSLLGITTKTYTLT 64  
Query 79 ANGGYGAVVSYVSIILVDQTSNLGNGYVLYGGIGQRQIGILIEARNNTYTFYSYIAEY 135  
                  G ++Y+ I +                  + GG+G + I + IYG  
Sbjct 65 QAG-TAKTITYIKITDLKMKRGATAEITSGGVGSTTVTIKFTSARGAGIKSQVVIY 120

>  [ref|XP\\_001603272.1](#)  PREDICTED: similar to ENSANGP00000031402 [Nasonia vitripennis]  
Length=118

[GENE ID: 100120502 LOC100120502](#) | similar to ENSANGP00000031402  
[Nasonia vitripennis]

Score = 97.7 bits (242), Expect = 4e-19, Method: Composition-based stats.  
Identities = 28/115 (24%), Positives = 49/115 (42%), Gaps = 5/115 (4%)

Query 23 RANPGVTLTKLDNVRTARAI-HNSLGQRVSGDRLVARNQDSASWGSQVQLTVNYPANG 81  
                  + T + +A++ H +G R GD L R                  LQ V+L + G  
Sbjct 6 LLLFVLLATSVAVALSAKSAKHVIGVRQPGDHLARREFVKKDSSWLQVVKLQQTTF---G 62  
Query 82 YGAVVSYVSIILVDQTSNLG-NGYVLYGGIGQRQIGILIEARNNTYTFYSYIAEY 135  
                  +++V +L                  G VL GG+G I + +++ +++ +YI EIY  
Sbjct 63 VDYGKITHVKLLDQNLKKGKATANVLAGGLGYSYITVHFVSKRSHSINYIVEIYA 117

>  [gb|ABD97959.1](#) ACP225 [Drosophila yakuba]  
Length=121

Score = 97.7 bits (242), Expect = 4e-19, Method: Composition-based stats.  
Identities = 18/112 (16%), Positives = 37/112 (33%), Gaps = 2/112 (1%)

Query 23 RANPGVTLTKLDNVRTARAIHNSLGQRVSGDRLVARNQDSASWGSQVQLTVNYPANGG 82  
                  + L+                  + G          G +L+ + + + L+ V V++  
Sbjct 8 IFVAVAIVAVLNVAFAFHGDGTTTFGVLKPGAKLIHKKEEIVEAKKFLRVVTRKRVHF--KPQ 65  
Query 83 YGAVVSYVSIILVDQTSNLGNGYVLYGGIGQRQIGILIEARNNTYTFYSYIAEY 134  
                  +S + I          S G +L GG + I + + ++ EIY  
Sbjct 66 QPYKLSAIVITDHSKGGTASLLEGGPPGKFAVIGFRSDRNHGLNFTLEIY 117

>  [ref|XP\\_001965767.1](#)  GF20011 [Drosophila ananassae]

[gb|EDV41415.1](#)  GF20011 [*Drosophila ananassae*]  
Length=122

GENE ID: [6502743 Dana\GF20011](#) | GF20011 gene product from transcript GF20011-RA  
[*Drosophila ananassae*] (10 or fewer PubMed links)

Score = 97.3 bits (241), Expect = 5e-19, Method: Composition-based stats.  
Identities = 20/97 (20%), Positives = 35/97 (36%), Gaps = 1/97 (1%)

```
Query 39  ARAIHNSLGQRVSGDRLVARNQDSASWGS LQNVQLTVNYPANGGYGAVVS YVSILVDQTS 98
          + G + + D L+AR + S LQ V T G ++Y+ I +
Sbjct 25  GEGNDYTYGSKATTDTLIARETITKSKMMLQTVTKTYTLTQAG-TAKTITYIQITDLKRM 83

Query 99  NLGNGYVLYGGIGQRQIGILIEARN TYTFSYIAEIYG 135
          + + GG+G + I + EI+G
Sbjct 84  RGASAEITSGGVGSTTVTIKFTSARGAGIKSQVEIWG 120
```

>  [gb|ABQ18257.1](#) unknown [*Lygus lineolaris*]  
Length=133

Score = 97.3 bits (241), Expect = 5e-19, Method: Composition-based stats.  
Identities = 20/101 (19%), Positives = 44/101 (43%), Gaps = 4/101 (3%)

```
Query 36  VRTARAIHNSLGQRVSGDRLVARNQDSASWGS LQNVQLTVNYPANGGYGAVVS YVSILVD 95
          ++ + +G R D+L+ + L+ V V A G +++Y+ +L
Sbjct 33  CGRNKSHNAFIGSRHWDKLLFMDHPKESKWLRTVSADV---ATGNLRGIINYIEVLDQ 89

Query 96  QTSNLGN-GYVLYGGIGQRQIGILIEARN TYTFSYIAEIYG 135
          +T+ G Y+ GG G + I+++ ++ +I +G
Sbjct 90  KTINGNGCAYLTSGGAGTNNVAFHIKSQRSHGLDFIIRAWG 130
```

>  [ref|XP\\_002050018.1](#)  GJ20423 [*Drosophila virilis*]  
[gb|EDW61211.1](#)  GJ20423 [*Drosophila virilis*]  
Length=122

GENE ID: [6625995 Dvir\GJ20423](#) | GJ20423 gene product from transcript GJ20423-RA  
[*Drosophila virilis*] (10 or fewer PubMed links)

Score = 97.3 bits (241), Expect = 5e-19, Method: Composition-based stats.  
Identities = 19/122 (15%), Positives = 38/122 (31%), Gaps = 2/122 (1%)

```
Query 15  VEDVDEFVRANPGVTLTKLDNVRT-ARAIHNSLGQRVSGDRLVARNQDSASWGS LQNVQL 73
          + + F+ + G +++ L+AR S S LQ
Sbjct 1  MNSILVPFILLMCTCVCVTHGLGGNNGEGYDYTYGAKLTTSTLIARETISKSKTLLQTTSK 60

Query 74  TVNYPANGGYGAVVS YVSILVDQTSNLGNGYVLYGGIGQRQIGILIEARN TYTFSYIAEI 133
          T G + Y++I + ++ GG+G + + + EI
Sbjct 61  TYTLTQAG-TAKNIDYINITNLKMKRGATAEIMSGGVGSTTVTVKFTSARGSGIKSQIEI 119

Query 134 YG 135
          +G
Sbjct 120 WG 121
```

>  [gb|ABD97966.1](#) ACP225 [*Drosophila yakuba*]  
Length=121

Score = 97.3 bits (241), Expect = 5e-19, Method: Composition-based stats.  
Identities = 18/112 (16%), Positives = 37/112 (33%), Gaps = 2/112 (1%)

```
Query 23  RANPGVTLTKLDNVRTARAIHNSLGQRVSGDRLVARNQDSASWGS LQNVQLTVNYPANGG 82
          + L+ + G G +L+ + + + L+ V V++
Sbjct 8  IFVAIAIVAVLNVAFAGHDGTTTFGVLPKPGAKLIHKEEIVEAKKFLRVVTRKVHF--KPQ 65

Query 83  YGAVVS YVSILVDQTSNLGNGYVLYGGIGQRQIGILIEARN TYTFSYIAEIY 134
          +S + I S G +L GG + I + + ++ EIY
Sbjct 66  QPYKLSAIVITDHSESKGGTASLLEGGPPGKFAVIGFRSDRNHGLNFTLEIY 117
```

>  [gb|ABD97964.1](#) ACP225 [*Drosophila yakuba*]  
Length=121

Score = 96.5 bits (239), Expect = 7e-19, Method: Composition-based stats.  
Identities = 18/112 (16%), Positives = 37/112 (33%), Gaps = 2/112 (1%)

Query 23 RANPGVTLTKLDNVRTARAIHNSLGQRVSGDRLVARNQDSASWGSLQNVQLTVNYPANGG 82  
+ L + V + G G +L+ + + + L+ V V++  
Sbjct 8 IFVAIAIVAVLNVVFGHDGTTTFGLKPGAKLIHKKEIIVEAKKFLRVVTRKVFH--KPQ 65  
Query 83 YGAVVSYVSVILVDQTSNLGNGYVLYGGIGQRQIGILIEARNTYTFYSYIAEIIY 134  
+S + I G +L GG + I + + ++ EIIY  
Sbjct 66 QPYKLSAIVITDHSEXKGGTASLLEGGPPGKFAVIGFRSDRNHGLNFTLEIY 117

> [ref|XP\\_002033647.1|](#) **G** GM20317 [Drosophila sechellia]

[gb|EDW47660.1|](#) **G** GM20317 [Drosophila sechellia]

Length=112

[GENE ID: 6608933 Dsec\GM20317](#) | GM20317 gene product from transcript GM20317-RA [Drosophila sechellia] (10 or fewer PubMed links)

Score = 96.5 bits (239), Expect = 8e-19, Method: Composition-based stats.  
Identities = 24/114 (21%), Positives = 45/114 (39%), Gaps = 4/114 (3%)

Query 23 RANPGVTLTKLDNVRTARAIHNSLGQRVSGDRLVARNQDSASWGSLQNVQLTVNYPANGG 82  
+ L + A + G+R S D L++R ++ + + VNYPA  
Sbjct 1 MRLLLLILSVLAVILGCHAYGATWGRNRNSNDYLLSRITNEARNPIKNNYWNVNVNYPA--- 57

Query 83 YGAVVSYVSVILVDQTSNLG-NGYVLYGGIGQRQIGILIEARNTYTFYSYIAEIIYG 135  
+S V + + +N G + + GG G R + + + + EI+G  
Sbjct 58 GFYNISAVIVYDNFKNNSGASPSLYSGGPGYRFATVNLRGQVNRGINSTVEIWG 111

> [ref|NP\\_610832.1|](#) **UG** CG13323 [Drosophila melanogaster]

[gb|AAF58432.1|](#) **G** CG13323 [Drosophila melanogaster]

[gb|AAV55445.1|](#) **G** IP04046p [Drosophila melanogaster]

[gb|ACL88185.1|](#) CG13323-PA [synthetic construct]

Length=112

[GENE ID: 36433 CG13323](#) | CG13323 gene product from transcript CG13323-RA [Drosophila melanogaster] (Over 10 PubMed links)

Score = 96.5 bits (239), Expect = 9e-19, Method: Composition-based stats.  
Identities = 23/114 (20%), Positives = 44/114 (38%), Gaps = 4/114 (3%)

Query 23 RANPGVTLTKLDNVRTARAIHNSLGQRVSGDRLVARNQDSASWGSLQNVQLTVNYPANGG 82  
+ L + A + G+R + D L++R + + + VNYPA  
Sbjct 1 MRLLLLILSVLAVILGCHAYGATWGRNRNNDYLLSRITTEVRNPIKNNYWNVNVNYPA--- 57

Query 83 YGAVVSYVSVILVDQTSNLG-NGYVLYGGIGQRQIGILIEARNTYTFYSYIAEIIYG 135  
+S V + + +N G + + GG G R + + + + EI+G  
Sbjct 58 GFYNISAVIVYDNFKNNSGASPSLYSGGPGYRFATVNLRGQVNRGINSTVEIWG 111

> [ref|XP\\_002081283.1|](#) **G** GD25795 [Drosophila simulans]

[gb|EDX06868.1|](#) **G** GD25795 [Drosophila simulans]

Length=112

[GENE ID: 6734254 Dsim\GD25795](#) | GD25795 gene product from transcript GD25795-RA [Drosophila simulans] (10 or fewer PubMed links)

Score = 96.2 bits (238), Expect = 1e-18, Method: Composition-based stats.  
Identities = 23/114 (20%), Positives = 45/114 (39%), Gaps = 4/114 (3%)

Query 23 RANPGVTLTKLDNVRTARAIHNSLGQRVSGDRLVARNQDSASWGSLQNVQLTVNYPANGG 82  
+ L + A + G+R + D L++R ++ + + VNYPA  
Sbjct 1 MRLLLLILSVLAVILGCHAYGATWGRNRNNDYLLSRITNEARNPIKNNYWNVNVNYPA--- 57

Query 83 YGAVVSYVSVILVDQTSNLG-NGYVLYGGIGQRQIGILIEARNTYTFYSYIAEIIYG 135  
+S V + + +N G + + GG G R + + + + EI+G  
Sbjct 58 GFYNISAVIVYDNFKNNSGASPSLYSGGPGYRFATVNLRGQVNRGINSTVEIWG 111

> [ref|NP\\_610833.1|](#) **UG** CG13324 [Drosophila melanogaster]

[gb|AAF58431.1|](#) **G** CG13324 [Drosophila melanogaster]

Length=112

[GENE ID: 36434 CG13324](#) | CG13324 gene product from transcript CG13324-RA



[Drosophila melanogaster] (Over 10 PubMed links)

Score = 96.2 bits (238), Expect = 1e-18, Method: Composition-based stats.  
Identities = 23/114 (20%), Positives = 44/114 (38%), Gaps = 4/114 (3%)

```
Query 23 RANPGVTLTKLDNVRTARAIHNSLGQRVSGDRLVARNQDSASWGS LQNVQLTVNYPANGG 82
      + L + A + G+RV+ D L++R ++ + + VNYP
Sbjct 1 MRLLLILSVLAVILGCHAYSATWGRVNNDFLLSRTREVRNPIKNNYVNVNYP---N 57

Query 83 YGAVVSVYSILVDQTSNLG-NGYVLYGGIGQRQIGILIEARNTYTF SYIAE IYG 135
      +S V + + +N G + + GG G R + + + EI+G
Sbjct 58 GFYNISAVIVYDNFKNNSGASPSLYSGGPGYRFATVNLRGQVNRGIDSTVEIWG 111
```

>  [ref|XP\\_001602278.1](#)  PREDICTED: similar to conserved hypothetical protein [Nasonia vitripennis]  
Length=126

[GENE ID: 100118260 LOC100118260](#) | similar to conserved hypothetical protein [Nasonia vitripennis]

Score = 95.4 bits (236), Expect = 2e-18, Method: Composition-based stats.  
Identities = 23/115 (20%), Positives = 45/115 (39%), Gaps = 2/115 (1%)

```
Query 21 FVRANPGVTLTKLDNVRTARAIHNSLGQRVSGDRLVARNQDSASWGS LQNVQLTVNYPAN 80
      F + ++ AR +G+RV GD L+ R+ + V +T
Sbjct 8 FFTIFATLAVSAQSESTVARQNDLVIGRRVEGDYLLNRSFIKKDASWIGKV-VTFTKTFT 66

Query 81 GYGAVVSVYSILVDQTSNLGNGYVLYGGIGQRQIGILIEARNTYTF SYIAE IYG 135
      G + ++ V L + + V+ GG+ + + +E+ ++ EIYG
Sbjct 67 GDGVSTITQVKALEQHENG-ASAKVIAGGVDYLYVTLRLESERYRHIDFVVEIYG 120
```

>  [ref|XP\\_002071834.1](#)  GK10198 [Drosophila willistoni]  
[gb|EDW82820.1](#)  GK10198 [Drosophila willistoni]  
Length=115

[GENE ID: 6648731 Dwil\GK10198](#) | GK10198 gene product from transcript GK10198-RA [Drosophila willistoni] (10 or fewer PubMed links)

Score = 95.0 bits (235), Expect = 2e-18, Method: Composition-based stats.  
Identities = 17/115 (14%), Positives = 45/115 (39%), Gaps = 2/115 (1%)

```
Query 23 RANPGVTLTKLDNVRTARAIHNSLGQRVSGDRLVARNQDSASWGS LQNVQLTVNYPANGG 82
      L + A + + G ++S L+ + + T+++P +G
Sbjct 1 MKLLQFVLVFSGILALGYAANATWGSKLSNSVLLNTQNVTLYKKNNDYQSSTISFPTSGS 60

Query 83 YG-AVVSYSILVDQTSNLG-NGYVLYGGIGQRQIGILIEARNTYTF SYIAE IYG 135
      ++Y+++ T++ G + GG+G I ++++ + A+ +G
Sbjct 61 VNTKTITTYITVDRFTNSSGPTSTLWTGGVGFATINVKSQYAQGINVTAQFWG 115
```

>  [gb|ABI20159.1](#) 16 kDa salivary protein [Phlebotomus duboscqi]  
Length=161

Score = 94.6 bits (234), Expect = 3e-18, Method: Composition-based stats.  
Identities = 49/136 (36%), Positives = 68/136 (50%), Gaps = 2/136 (1%)

```
Query 2 APDPETVSAKITLVEDVDFVRANPGVTLTKLDNVRTARA-IHNSLGQRVSGDRLVARNQ 60
      D V + +FV NP L + R I+ LG R GDRLV
Sbjct 27 DDDAPDRQVNFVSVNSLADFAENPEAELEMMHMYSDYRGQINYVLGARQRGDRLVGTAS 86

Query 61 DSASWGS LQNVQLTVNYPANGGYGAVVSVYSILVDQTSNLGNGYVLYGGIGQRQIGILIE 120
      + W QNV + + YP G GA+V++VS+ + Q++NLG YV GGI QR I I++E
Sbjct 87 NGRWRPRQNVDEIEIKYPTKG-RGALVTFVSLNITQSTNLGRAYVTKGGIHRNITIVVE 145

Query 121 ARNTYTF SYIAE IYGL 136
      A +T YI I+G+
Sbjct 146 AYSTTFVQYICNIFGM 161
```

>  [gb|ABD97962.1](#) ACP225 [Drosophila yakuba]  
Length=121

Score = 94.6 bits (234), Expect = 3e-18, Method: Composition-based stats.  
Identities = 18/112 (16%), Positives = 37/112 (33%), Gaps = 2/112 (1%)

Query 23 RANPGVTLTKLDNVRTARAIHNSLGQRVSGDRLVARNQDSASWGS LQNVQLTVNYPANGG 82  
+ L+ + G G +L+ + + + L+ V V++  
Sbjct 8 IFVAIAIVAVLNVAFAAGHDGTTTFGVLKPGAKLIHKEEIVEAKKFLRVVTRKRVHF--KPQ 65

Query 83 YGAVVSVYSILVDQTSNLGNGYVLYGGIGQRQIGILIEARNTYTF SYIAE IY 134  
+S + I S G +L GG + I + + ++ E IY  
Sbjct 66 QPYKLSAIVITDHSESKGGTASLEGGPPGKCAVIGFRSDRNHGLNFTLEIY 117

>  [gb|ABD97963.1](#) | ACP225 [Drosophila yakuba]  
Length=121

Score = 92.7 bits (229), Expect = 1e-17, Method: Composition-based stats.  
Identities = 17/96 (17%), Positives = 34/96 (35%), Gaps = 2/96 (2%)

Query 39 ARAIHNSLGQRVSGDRLVARNQDSASWGS LQNVQLTVNYPANGGYGAVVSVYSILVDQTS 98  
+ G G +L+ + + + L+ V V++ +S + I S  
Sbjct 24 GHDGTTTFGVLKPGAKLIHKEEIVEAKKFLRVVTRKRVHF--KPQQPYKLSAIVITDHSES 81

Query 99 NLGNGYVLYGGIGQRQIGILIEARNTYTF SYIAE IY 134  
G +L GG + I + + ++ E IY  
Sbjct 82 KGGTASLEGGPPGKFAVIGFRSDRNHGLNFTLEIY 117

>  [ref|XP\\_001604205.1](#) |  PREDICTED: hypothetical protein [Nasonia vitripennis]  
Length=137

[GENE ID: 100120578 LOC100120578](#) | hypothetical protein LOC100120578  
[Nasonia vitripennis]

Score = 92.3 bits (228), Expect = 1e-17, Method: Composition-based stats.  
Identities = 23/110 (20%), Positives = 43/110 (39%), Gaps = 4/110 (3%)

Query 25 NPGVTLTKLDNVRTARA-IHNSLGQRVSGDRLVARNQDSASWGS LQNVQLTVNYPANGGY 83  
+ T L V A+ H + + S D L+ LQ V+LT +P G  
Sbjct 7 VLVLLATSLTIVLAAKPPNHLIIDAKKSSDHLQIESVKGPKSKWLQKVKLTKTFP--GNN 64

Query 84 GAVVSVYSILVDQTSNLG-NGYVLYGGIGQRQIGILIEARNTYTF SYIAE 132  
+ ++ V +L G +L GG G + + ++ ++ Y+ +  
Sbjct 65 HSNITQVQLLDQDQKNGTAAAILTGGPGNPFVTVQFKSTRGHSVDYVVK 114

>  [ref|XP\\_001661180.1](#) |  hypothetical protein AaeL\_AAEL002263 [Aedes aegypti]  
[gb|EAT46579.1](#) |  conserved hypothetical protein [Aedes aegypti]  
Length=118

[GENE ID: 5574109 AaeL\\_AAEL002263](#) | hypothetical protein [Aedes aegypti]  
(10 or fewer PubMed links)

Score = 92.3 bits (228), Expect = 1e-17, Method: Composition-based stats.  
Identities = 25/117 (21%), Positives = 45/117 (38%), Gaps = 5/117 (4%)

Query 22 VRANPGVTLTKLDNVRTARAIHNSLGQRVSGDRLVARNQDSASWGS LQNVQLTVNY--PA 79  
+ V L + + A + G+RV GDRL+ + + Y P  
Sbjct 3 TILSTLVVLLAVTALIIYADSN--QWGRRVVGDRLQSATIVNNSLPVPIKTAVFQYLPQ 60

Query 80 NGGYGAVVSVYSILVDQTSNLGN-GYVLYGGIGQRQIGILIEARNTYTF SYIAE IY 135  
V+Y+ + + LG ++ GGI Q + + +R F++ E+YG  
Sbjct 61 GSARAPNVTYIILARDNVRNGLGGFAALISGGINQTHATVKLSSRPNLGFNFTEIYVY 117

>  [ref|XP\\_002028227.1](#) |  GL16228 [Drosophila persimilis]  
[gb|EDW38776.1](#) |  GL16228 [Drosophila persimilis]  
Length=122

[GENE ID: 6603250 Dper\GL16228](#) | GL16228 gene product from transcript GL16228-RA  
[Drosophila persimilis] (10 or fewer PubMed links)

Score = 91.9 bits (227), Expect = 2e-17, Method: Composition-based stats.  
Identities = 21/120 (17%), Positives = 41/120 (34%), Gaps = 6/120 (5%)

Query 21 FVRANPGVTLTKLDNV-----RTARAIHNSLGQRVSGDRLVARNQDSASWGS LQNVQLTV 75  
F + + + + ++ + G +++ D L+AR + + LQ T  
Sbjct 3 FSSVFLLLLGSYVCLINGLGGSSSEGNDYTWGKTLTDTLIIAREVITKTKMLLQTTTKTY 62

Query 76 NYPANGGYGAVVSVYSILVDQTSNLGNGYVLYGGIGQRQIGILIEARNTYTF SYIAE IY 135

G +SY+ I + + GG+G + I + EIYG  
Sbjct 63 TLTQAG-TAKTISYIHITDLKRMRGATAEITSGGVGDTTIVTIKFTSSRSGSIKQVEIYG 121

>  [ref|XP\\_002091873.1](#)  GE11995 [Drosophila yakuba]  
[gb|EDW91585.1](#)  GE11995 [Drosophila yakuba]  
Length=83

[GENE ID: 6531037 Dyak\GE11995](#) | GE11995 gene product from transcript GE11995-RA [Drosophila yakuba] (10 or fewer PubMed links)

Score = 91.9 bits (227), Expect = 2e-17, Method: Composition-based stats.  
Identities = 15/84 (17%), Positives = 30/84 (35%), Gaps = 2/84 (2%)

Query 54 RLVARNQDSASWGLQNVQLTVNYPANGGYGAVVSIVLVDQTSNLGN-GYVLYGGIGQ 112  
+ R + L+ V + ++ + I G Y+ GG  
Sbjct 1 MHLRREIITEKSKFLRVVTRDYVFEQK-KLARTITQIVITDQVRDGNNGGHAYLTEGGPQT 59  
Query 113 RQIGILIEARNTYTFSYIAEIIYGL 136  
I ++++ FS+I +IYG+  
Sbjct 60 TYAKIHLKSQRNQGFSFIIDIYGI 83

>  [ref|XP\\_001661179.1](#)  hypothetical protein AaeL\_AAEL002263 [Aedes aegypti]  
[gb|EAT46578.1](#)  conserved hypothetical protein [Aedes aegypti]  
Length=117

[GENE ID: 5574109 AaeL\\_AAEL002263](#) | hypothetical protein [Aedes aegypti] (10 or fewer PubMed links)

Score = 91.5 bits (226), Expect = 2e-17, Method: Composition-based stats.  
Identities = 26/116 (22%), Positives = 46/116 (39%), Gaps = 4/116 (3%)

Query 22 VRANPGVTLTKLDNVRTARAIHNSLGQRVSGDRLVARNQDSASWGLQNVQLTVNYPANG 81  
+ V L + + A + G+RV GDRL+ + + Y G  
Sbjct 3 TILSTLVVLLAVTALYADSN--QWGRRVVGDRLQLSATIVNNSLPVPIKTAVFQYLPPG 60  
Query 82 GYGA-VVSYVSIIVLVDQTSNLGN-GYVLYGGIGQRQIGILIEARNTYTFSYIAEIIY 135  
A V+Y+ + + LG ++ GGI Q + + +R F++ E+YG  
Sbjct 61 SARAPNVTYILARDNVRNGLGGFAALISGGINQTHATVKLSSRPNLGFNFTIEVYG 116

>  [gb|ABD97967.1](#) ACP225 [Drosophila teissieri]  
Length=120

Score = 90.8 bits (224), Expect = 4e-17, Method: Composition-based stats.  
Identities = 20/90 (22%), Positives = 36/90 (40%), Gaps = 3/90 (3%)

Query 45 SLGQRVSGDRLVARNQDSASWGLQNVQLTVNYPANGGYGAVVSIVLVDQTSNLNGY 104  
S G G +L+ + + S L+ V V++ +S + I SN G  
Sbjct 30 SPFVLKPGAKLIHKEEIVESKKFLRVVTRKVFHFKPQ---PFKLSAIVITDHSESNGGTAS 86  
Query 105 VLYGGIGQRQIGILIEARNTYTFSYIAEIIY 134  
+L GG + I ++ + ++ EIIY  
Sbjct 87 LLEGGPPGKFAVIGFRSKRNHGLNFTLEIIY 116

>  [gb|ACY69959.1](#) putative putative salivary secreted protein [Cimex lectularius]  
Length=136

Score = 90.8 bits (224), Expect = 4e-17, Method: Composition-based stats.  
Identities = 16/123 (13%), Positives = 40/123 (32%), Gaps = 8/123 (6%)

Query 21 FVRANPGVTLTKLDN---VRTARAIHNSLGQRVSGD---RLVARNQDSASWGLQNVQL 73  
F+ ++ + + R + G + D +L+ ++  
Sbjct 8 FLAAILLNISAQQSASTTRRCRKNDQHNAVFGTKQPDNDTQQLLRSENIKVGPRQKKSTTY 67  
Query 74 TVNYPANGGYGAVVSIVLVDQTSNLNG-YVLYGGIGQRQIGILIEARNTYTFSYIAE 132  
YP G ++Y+ G +++ GG+G + + + + ++  
Sbjct 68 PFVYPEQGDIRGNITYIEASDRADGKGGCVFLIEGGVGYDNVTLHFRTQKSLGMEFVVS 127  
Query 133 IYG 135  
IYG  
Sbjct 128 IYG 130

> [gb|AA34548.1](#) putative 11.4 kDa secreted salivary gland protein [Stomoxys calcitrans]  
Length=123

Score = 90.4 bits (223), Expect = 5e-17, Method: Composition-based stats.  
Identities = 18/97 (18%), Positives = 36/97 (37%), Gaps = 2/97 (2%)

```
Query 41 AIHNSLGQRVSGDRLVARNQDSASWGS LQNVQLTVNYPANGGYGAVV-SYVSILVD-QTS 98
      + + G      DR++AR++      + T+ YP G      + + + +
Sbjct 23 GNNATWGHIGYFDRVRIARDRVEHPANWFTKHKETILYPPKGHENFNILTAIRVTDYGGPK 82

Query 99 NLGNGYVLYGGIGQRQIGILIEARNTYTF SYIAE IYG 135
      N G +L GG G      I + ++      + E +G
Sbjct 83 NFGQATLLQGGPGHFNATIEVRSQTRRPLNMTIEYFG 119
```

> [ref|XP\\_976138.1](#) **UG** PREDICTED: hypothetical protein [Tribolium castaneum]  
[gb|EFA01092.1](#) **G** hypothetical protein TcasGA2\_TC004015 [Tribolium castaneum]  
Length=169

[GENE ID: 655848 TcasGA2\\_TC004015](#) | hypothetical protein LOC655848  
[Tribolium castaneum] (10 or fewer PubMed links)

Score = 90.0 bits (222), Expect = 8e-17, Method: Composition-based stats.  
Identities = 20/99 (20%), Positives = 38/99 (38%), Gaps = 4/99 (4%)

```
Query 41 AIHNSLGQRVSGDRLVARNQDSASWGS LQNVQLTVNYP--NGGYGA-VVSYVSILVDQT 97
      + +GQ DRL+      S + + YP G + ++ + I
Sbjct 70 SGDVIIGQIGYLDRLLFNQIYYKPRRSWSGREKIIIEYPKDMTGKHN YETINSIRIYNK FY 129

Query 98 SN-LGNGYVLYGGIGQRQIGILIEARNTYTF SYIAE IYG 135
      +L GG+G R + I + ++      F Y+ +I+G
Sbjct 130 DGLDSKAKILSGGVGSRFVKIKLSSKRKNGFKYL VQIFG 168
```

> [gb|ACI30202.1](#) hypothetical conserved mosquito protein [Anopheles darlingi]  
Length=119

Score = 90.0 bits (222), Expect = 8e-17, Method: Composition-based stats.  
Identities = 22/111 (19%), Positives = 43/111 (38%), Gaps = 3/111 (2%)

```
Query 28 VLTlTKLDNVRTARAIHNSLGQRVSGDRLVARNQDSASWGS LQNVQLTVNY--PANGG-YGA 85
      + L +V      G+RV+GDR +      +      Y PA G
Sbjct 8 LVLFLSLSVVLIYGESRQWGRRVAGDRQLDYTVLVNNSLPVPQKSS IYRYLPAPGAYRPP 67

Query 86 VVSYVSILVDQTSNLGN-GYVLYGGIGQRQIGILIEARNTYTF SYIAE IYG 135
      ++ + + + G ++ GGI Q + + + ++      F++ EIYG
Sbjct 68 NITAIYARDNVPAGRGGYAAIVSGGINQANVTVKLTSQP YQRFNF TIE IYG 118
```

> [ref|XP\\_002090966.1](#) **G** GE13403 [Drosophila yakuba]

[gb|AAQ09833.1](#) **G** CG13324 [Drosophila yakuba]

[gb|EDW90678.1](#) **G** GE13403 [Drosophila yakuba]

Length=112

[GENE ID: 6530020 Dyak\GE13403](#) | GE13403 gene product from transcript GE13403-RA  
[Drosophila yakuba] (10 or fewer PubMed links)

Score = 89.6 bits (221), Expect = 9e-17, Method: Composition-based stats.  
Identities = 23/98 (23%), Positives = 43/98 (43%), Gaps = 4/98 (4%)

```
Query 39 ARAIHNSLGQRVSGDRLVARNQDSASWGS LQNVQLTVNYPANGGYGAVVSYVSILVDQTS 98
      A + G+RV+ D L++R ++ +      + VNYP A      +S V + + +
Sbjct 17 CHAYSATWGRRVNNDFFLLSRTREVRNP IKNNYWNVNVNYP A---GFYNISAVIVYDNFKN 73

Query 99 NLG-NGYVLYGGIGQRQIGILIEARNTYTF SYIAE IYG 135
      N G + + GG G R + + +      + EI+G
Sbjct 74 NSGASPSLYSGGPGYRFATVNLRGQVNRGINSTVEIWG 111
```

> [ref|XP\\_002040057.1](#) **G** GM15559 [Drosophila sechellia]

[gb|EDW56922.1](#) **G** GM15559 [Drosophila sechellia]

Length=121

[GENE ID: 6615686 Dsec\GM15559](#) | GM15559 gene product from transcript GM15559-RA

[Drosophila sechellia] (10 or fewer PubMed links)

Score = 89.6 bits (221), Expect = 1e-16, Method: Composition-based stats.  
Identities = 19/117 (16%), Positives = 34/117 (29%), Gaps = 1/117 (0%)

```
Query 19 DEFVRANPGVTLTKLDNVRTARAIHNSLGQRVSGDRLVARNQDSASWGSLQNVQLTVNYP 78
          F+      N +      + G + + D L+A      + S L T
Sbjct 5  AVFLLLVGTHICFIDANFGSGEGNDYTYGTQATTTDLIASETVTKSKALLGTTTKTYTLT 64

Query 79 ANGGYGAVVSVYVILVDQTSNLGNGYVLYGGIGQRQIGILIEARNTYTFYSYIAEIIY 135
          G ++Y+ I +      + GG+G + I +      IYG
Sbjct 65 QAG-TAKTITYIKITDLKRMRGATAEITSGGVGSTTVTIKFTSARGAGIKSQVVIY 120
```

>  [ref|XP\\_002082759.1](#)  GD25061 [Drosophila simulans]  
[gb|EDX08344.1](#)  GD25061 [Drosophila simulans]  
Length=121

[GENE ID: 6735849 Dsim\GD25061](#) | GD25061 gene product from transcript GD25061-RA [Drosophila simulans] (10 or fewer PubMed links)

Score = 89.6 bits (221), Expect = 1e-16, Method: Composition-based stats.  
Identities = 19/117 (16%), Positives = 33/117 (28%), Gaps = 1/117 (0%)

```
Query 19 DEFVRANPGVTLTKLDNVRTARAIHNSLGQRVSGDRLVARNQDSASWGSLQNVQLTVNYP 78
          F+      N +      + G + D L+A      + S L T
Sbjct 5  GVFLLLVGTHICFIDANFGSGEGNDYTYGTHATTTDLIASETVTKSKALLGTTTKTYTLT 64

Query 79 ANGGYGAVVSVYVILVDQTSNLGNGYVLYGGIGQRQIGILIEARNTYTFYSYIAEIIY 135
          G ++Y+ I +      + GG+G + I +      IYG
Sbjct 65 QAG-TAKTITYIKITDLKRMRGATAEITSGGVGSTTVTIKFTSARGAGIKSQVVIY 120
```

>  [ref|XP\\_002086118.1](#)  GE14474 [Drosophila yakuba]  
[ref|XP\\_002090583.1](#)  GE13194 [Drosophila yakuba]  
[gb|EDW90295.1](#)  GE13194 [Drosophila yakuba]  
[gb|EDW99588.1](#)  GE14474 [Drosophila yakuba]  
Length=117

[GENE ID: 6539219 Dyak\GE14474](#) | GE14474 gene product from transcript GE14474-RA [Drosophila yakuba] (10 or fewer PubMed links)

Score = 89.2 bits (220), Expect = 1e-16, Method: Composition-based stats.  
Identities = 22/114 (19%), Positives = 47/114 (41%), Gaps = 2/114 (1%)

```
Query 23 RANPGVTLTKLDNVRTARAIHNSLGQRVSGDRLVARNQDSASWGSLQNVQLTVNYPANGG 82
          + L V A A + S G ++S +LV+ + + Q V +++P G
Sbjct 1  MKVLQIALVFSAIVAIFAANASWGAKLSSSKLVSTQNVTLHKKANQYVSSLISFPLTQG 60

Query 83 YG-AVVSYSVILVDQTSNLG-NGYVLYGGIGQRQIGILIEARNTYTFYSYIAEIIY 134
          + Y+SI T++ G + + GG G + + ++ + + A+ +
Sbjct 61 TNTKTIRYISITDRFTNSSGSPSTLWSGGPGFISAKVNVTSQLSQGINVTAQFW 114
```

>  [gb|ABR27885.1](#) salivary secreted protein [Triatoma infestans]  
Length=129

Score = 89.2 bits (220), Expect = 1e-16, Method: Composition-based stats.  
Identities = 19/121 (15%), Positives = 41/121 (33%), Gaps = 5/121 (4%)

```
Query 20 EFVRANPGVTLTKLDNVRTARA-IHNSLGQRVSGDRLVARNQDSA-SWGSLQNVQLTVNY 77
          +G++ D ++ + S +W V V Y
Sbjct 6  VITLLLVTCLYVTYGWAPHQYGNHSLIIGRKGYNVILFQKTVSKKNWNPFGKVSIEDVTY 65

Query 78 PANGGYGAV--VSVYVILVDQTSNLGN-GYVLYGGIGQRQIGILIEARNTYTFYSYIAEIIY 134
          P G ++ + + +++ G YVL GGI + + I +++ + + I+
Sbjct 66 PVRPIPGRRLITEIDAIDLSDNDKGGYAYVLKGGINRNNVTIHFKSQKGRGYKFNLTIF 125

Query 135 G 135
          G
Sbjct 126 G 126
```

>  [ref|XP\\_316478.4](#)  AGAP006442-PA [Anopheles gambiae str. PEST]

[gb|EAA11094.5|](#)  AGAP006442-PA [Anopheles gambiae str. PEST]  
Length=119

[GENE ID: 1277050 AgaP\\_AGAP006442](#) | AGAP006442-PA [Anopheles gambiae str. PEST]  
(10 or fewer PubMed links)

Score = 88.8 bits (219), Expect = 2e-16, Method: Composition-based stats.  
Identities = 21/99 (21%), Positives = 39/99 (39%), Gaps = 3/99 (3%)

```
Query 40  RAIHNSLGQRVSGDRLVARNQDSASWGS LQNVQLTVNY-PANGG-YGAVVSYVSI LVDQT 97
           G+RVSGDRL+      +      +      Y PA G      ++ +      +
Sbjct 20  YGDSRQWGRRVSGDRLLDYAVVVNNSLPVPEKSSIYRYLPAAGAYRPPNITAI FTRDNVP 79

Query 98  SNLGN-GYVLYGGIGQRQIGILIEARNTYTF SYIAE IYG 135
           G      ++ GG+ Q      + + + + +      F++ EIYG
Sbjct 80  GGKGGFAGIVSGGVNQSNTLKLTSKPYQRFNFTIE IYG 118
```

>  [ref|XP\\_001976402.1|](#)  GG22852 [Drosophila erecta]

[gb|EDV56802.1|](#)  GG22852 [Drosophila erecta]  
Length=133

[GENE ID: 6547809 Dere\GG22852](#) | GG22852 gene product from transcript GG22852-RA  
[Drosophila erecta] (10 or fewer PubMed links)

Score = 88.4 bits (218), Expect = 2e-16, Method: Composition-based stats.  
Identities = 17/107 (15%), Positives = 29/107 (27%), Gaps = 10/107 (9%)

```
Query 36  VRTARAIHNSLGQRVSGDRLVARNQDSASWGS LQNVQLTVNY-PANGGYGAVVSYVSI L V 94
           V      + G      ++      GS      V Y NG      ++ V +
Sbjct 29  VLLNGASVTVGWHVKYASV LHTEDVYLP PGPSPG---RDVAYGSQNGSDNYRITGVHVED 85

Query 95  DQTSNLGNGYVLYGGIGQRQIGILIEARNT----YTF SYIAE IYGL 136
           +      +      GGIGQ+ + +      IYG+
Sbjct 86  LG-AQGAEAVLTAGGIGQQFVVLHCRRLRGAE EQPQAAHLEVSIYGV 131
```

>  [ref|XP\\_001987096.1|](#)  GH20161 [Drosophila grimshawi]

[gb|EDW01963.1|](#)  GH20161 [Drosophila grimshawi]  
Length=122

[GENE ID: 6560517 Dgri\GH20161](#) | GH20161 gene product from transcript GH20161-RA  
[Drosophila grimshawi] (10 or fewer PubMed links)

Score = 88.4 bits (218), Expect = 2e-16, Method: Composition-based stats.  
Identities = 17/117 (14%), Positives = 37/117 (31%), Gaps = 1/117 (0%)

```
Query 19  DEFVRANPGVTLTKLDNVRTARAIHNSLGQRVSGDRLVARNQDSASWGS LQNVQLTVNYP 78
           F+      ++ + A      + G + +      L+AR      S L      T
Sbjct 6  AIFILTVCASMGALGINALGNAE GDYTYGAKQATSELIARETIITSKTL LGGTTTRTYTLV 65

Query 79  ANGGYGAVVSYVSI LVDQTSNLGNGYVLYGGIGQRQIGILIEARNTYTF SYIAE IYG 135
           G      + Y++I      +      + GG+      + +      ++ +      EI+G
Sbjct 66  QAG-TPKTIHYINIRNLKRRRGATATIESGGVTATTLTVRFTSQRSSGIKSEIEIWG 121
```

>  [ref|XP\\_002033648.1|](#)  GM20316 [Drosophila sechellia]

[gb|EDW47661.1|](#)  GM20316 [Drosophila sechellia]  
Length=112

[GENE ID: 6608934 Dsec\GM20316](#) | GM20316 gene product from transcript GM20316-RA  
[Drosophila sechellia] (10 or fewer PubMed links)

Score = 88.1 bits (217), Expect = 3e-16, Method: Composition-based stats.  
Identities = 21/98 (21%), Positives = 41/98 (41%), Gaps = 4/98 (4%)

```
Query 39  ARAIHNSLGQRVSGDRLVARNQDSASWGS LQNVQLTVNYPANGGYGAVVSYVSI LVDQTS 98
           A      + G+RV+ D L++R ++      +      + VNYP      +S V +      + +
Sbjct 17  CHAYSATWGRRVNNDFFLLSR TREVRNPIKNNYWNVNYP---NGFYNISAVIVYDNFKN 73

Query 99  NLG-NGYVLYGGIGQRQIGILIEARNTYTF SYIAE IYG 135
           + G + +      GG G R      + + +      EI+G
Sbjct 74  SSGASPSLYSGGPGYRFATVNLRGQVNRGIDSTVEIWG 111
```

> [gb|ABN54491.1](#) conserved secreted protein [Oncopeltus fasciatus]  
Length=116

Score = 87.7 bits (216), Expect = 4e-16, Method: Composition-based stats.  
Identities = 18/99 (18%), Positives = 38/99 (38%), Gaps = 1/99 (1%)

Query 27 GVTLT~~TKLDNV~~RTARAIHNSLGQRVSGDRLVARNQDSASWGS~~LQNVQLTVNYP~~PANGGYGAV 86  
VT + + LG R GD+L+ + L+ V++P +G V  
Sbjct 15 LVTCYPKTACGDG~~PSHNL~~LLGNRTYGD~~KLLYS~~SGSEHIDSSLLRVKTKD~~VHWP~~LHGVSPEV 74

Query 87 VSYV~~SILVDQ~~TSNLGN-GYVLYGGIGQRQIGILIEARNT 124  
++ + ++ G ++ GG G R + ++ +  
Sbjct 75 ITRLEVVDKAKD~~SGGCA~~FLSGGGP~~GS~~RVAKLHLK~~TQ~~RG 113

> [ref|XP\\_001976379.1](#)  GG20045 [Drosophila erecta]  
[gb|EDV56779.1](#)  GG20045 [Drosophila erecta]  
Length=121

[GENE ID: 6547443 Dere|GG20045](#) | GG20045 gene product from transcript GG20045-RA [Drosophila erecta] (10 or fewer PubMed links)

Score = 87.7 bits (216), Expect = 4e-16, Method: Composition-based stats.  
Identities = 20/117 (17%), Positives = 34/117 (29%), Gaps = 1/117 (0%)

Query 19 DEFVRANPGVTLTKLDNVRTARAIHNSLGQRVSGDRLVARNQDSASWGS~~LQNVQLTVNYP~~ 78  
F+ N + + G + + D L+A + S L T  
Sbjct 5 GVFLLLVGTHVCFIDANFGSGEGNDYTYGTQATTTDLIASETVTKSKSLLGTTTKTYTLT 64

Query 79 ANGGYGAVVS~~VSYV~~SILVDQTSNLGN~~GYVLY~~GGIGQRQIGILIEARNTYTF~~SYIAE~~IYG 135  
G +SY+ I + + GG+G + I + IYG  
Sbjct 65 QAG-TAKTISYIKITDLK~~RMRG~~ATAEITSGGVG~~STVT~~IKF~~T~~SARGG~~IKS~~QVVIYG 120

> [ref|XP\\_002090965.1](#)  GE13402 [Drosophila yakuba]  
[gb|EDW90677.1](#)  GE13402 [Drosophila yakuba]  
Length=112

[GENE ID: 6530019 Dyak|GE13402](#) | GE13402 gene product from transcript GE13402-RA [Drosophila yakuba] (10 or fewer PubMed links)

Score = 87.3 bits (215), Expect = 4e-16, Method: Composition-based stats.  
Identities = 22/98 (22%), Positives = 42/98 (42%), Gaps = 4/98 (4%)

Query 39 ARAIHNSLGQRVSGDRLVARNQDSASWGS~~LQNVQLTVNYP~~PANGGYGAVVS~~VSYV~~SILVDQTS 98  
A + G+RV+ D L++R ++ + + VNYP A +S V + + +  
Sbjct 17 CHAYSATWGR~~RVNND~~FLLSRTREVRNPIKNNYWN~~VNVN~~YPA---GFYNISAVIVYDNFKN 73

Query 99 NLG-NGYVLYGGIGQRQIGILIEARNTYTF~~SYIAE~~IYG 135  
N G + + GG G R + + + E++G  
Sbjct 74 NSGASPSLYSGPGYRFATVNL~~RQVNR~~GIDSTVEVWG 111

> [ref|NP\\_724118.1](#)  CG31789 [Drosophila melanogaster]  
[gb|AAN11008.1](#)  CG31789 [Drosophila melanogaster]  
[gb|ACL68720.1](#)  LP09219p [Drosophila melanogaster]  
Length=117

[GENE ID: 318943 CG31789](#) | CG31789 gene product from transcript CG31789-RA [Drosophila melanogaster] (10 or fewer PubMed links)

Score = 87.3 bits (215), Expect = 4e-16, Method: Composition-based stats.  
Identities = 21/114 (18%), Positives = 45/114 (39%), Gaps = 2/114 (1%)

Query 23 RANPGVTLTKLDNVRTARAIHNSLGQRVSGDRLVARNQDSASWGS~~LQNVQLTVNYP~~PANGG 82  
L + A A + S G ++S +LV+ + + Q V +++P G  
Sbjct 1 MKALQFALVFSAILAIAFAANASW~~GAKL~~SSSKLVSTQNV~~TIYK~~KANQYVSS~~LIS~~PLAGQ 60

Query 83 YG-AVVS~~VSYV~~SILVDQTSNLGN-GYVLYGGIGQRQIGILIEARNTYTF~~SYIAE~~IY 134  
+ Y+SI T++ G + GG G + + ++ + + A+ +  
Sbjct 61 SNTKTIRYISITDRFTN~~SSGP~~YSTLWSGGP~~FINA~~QVNVTSQFSQGINVTAQFW 114

> [ref|XP\\_002038990.1](#)  GM17281 [Drosophila sechellia]



[gb|EDW55636.1|](#) **G** GM17281 [Drosophila sechellia]  
Length=117

[GENE ID: 6614562 Dsec\GM17281](#) | GM17281 gene product from transcript GM17281-RA  
[Drosophila sechellia] (10 or fewer PubMed links)

Score = 87.3 bits (215), Expect = 5e-16, Method: Composition-based stats.  
Identities = 22/114 (19%), Positives = 46/114 (40%), Gaps = 2/114 (1%)

```
Query 23 RANPGVTLTKLDNVRTARAIHNSLGQRVSGDRLVARNQDSASWGS LQNVQLTVNYPANGG 82
          + L V A A + S G ++S +LV+ + + Q V +++P G
Sbjct 1 MKALQIALVFS AIVAI AFAANASWGAKLSSSKLVSTQNVTIYKKANQYVSSIISFPLAQ 60

Query 83 YG-AVVSYSILVDQTSNLGN-GYVLYGGIGQRQIGILIEARNTYTF SYIAEIIY 134
          + Y+SI T++ G + GG G + + ++ + + A+ +
Sbjct 61 SNTKTIYRISITDRFTNSSGPySTLWSGGPGFISAKVNVTSQFSQGINVTAQFW 114
```

> [ref|NP\\_726325.1|](#) **UG** CG30411 [Drosophila melanogaster]

[gb|AAL48593.1|](#) **G** RE06996p [Drosophila melanogaster]

[gb|AAM68251.1|](#) **G** CG30411 [Drosophila melanogaster]

[gb|ACL86455.1|](#) CG30411-PA [synthetic construct]

[gb|ACL91066.1|](#) CG30411-PA [synthetic construct]

Length=141

[GENE ID: 246600 CG30411](#) | CG30411 gene product from transcript CG30411-RA  
[Drosophila melanogaster] (10 or fewer PubMed links)

Score = 86.9 bits (214), Expect = 5e-16, Method: Composition-based stats.  
Identities = 16/108 (14%), Positives = 29/108 (26%), Gaps = 11/108 (10%)

```
Query 36 VRTARAIHNSLGQRVSGDRLVARNQDSASWGS LQNVQLTVNYP-ANGGYGAVVSYSILV 94
          V A + G ++ + GS V Y ++ V +
Sbjct 36 VLLGNAASVTWGHVNKYASVLHTEDEVLT PGPSPG---RDVAYGLQKASDNRYITGVHVED 92

Query 95 DQTSNLNGYVLYGGIGQRQIGILIE-----ARNTYTF SYIAEIIYGL 136
          + GGIGQ+ + + + IYG+
Sbjct 93 LGAD-EAEAVLTSGGIGQQFVVLRCRRLR DSEGP ERAAHLEVSIYGV 139
```

> [ref|XP\\_002082783.1|](#) **G** GD11761 [Drosophila simulans]

[gb|EDX08368.1|](#) **G** GD11761 [Drosophila simulans]

Length=138

[GENE ID: 6735873 Dsim\GD11761](#) | GD11761 gene product from transcript GD11761-RA  
[Drosophila simulans] (10 or fewer PubMed links)

Score = 86.9 bits (214), Expect = 6e-16, Method: Composition-based stats.  
Identities = 16/105 (15%), Positives = 28/105 (26%), Gaps = 8/105 (7%)

```
Query 36 VRTARAIHNSLGQRVSGDRLVARNQDSASWGS LQNVQLTVNYP-ANGGYGAVVSYSILV 94
          V A + G ++ G+ V Y N ++ V +
Sbjct 36 VLLGNAASVTWGHVNKYASVLHTEDEVLT PPGTPG---RDVAYGLENASDNRYITGVHVED 92

Query 95 DQTSNLNGYVLYGGIGQRQIGILIEARNT---YTF SYIAEIIYGL 136
          + GGIGQ+ + + + IYG+
Sbjct 93 LGADG-AEALLTAGGIGQQFVVLHCRRLPNSEEQAAHLEVSIYGV 136
```

> [ref|XP\\_001604117.1|](#) **UG** PREDICTED: similar to HDC07203 [Nasonia vitripennis]  
Length=133

[GENE ID: 100120478 LOC100120478](#) | similar to HDC07203 [Nasonia vitripennis]

Score = 86.5 bits (213), Expect = 8e-16, Method: Composition-based stats.  
Identities = 18/130 (13%), Positives = 40/130 (30%), Gaps = 13/130 (10%)

```
Query 18 VDEFVRANPGVTL-----TKLDNVRTARAIHNSLGQRVSGDRLVARNQDSASWG 66
          + F + + L+ V + +G R + D LV + +
Sbjct 1 MTSFKTLSLVAIVLVVAATVSSSPVPLEKVEVFTSNDLVVGS RQARDSLVYTESITEKFL 60

Query 67 SLQNVQLTVNYPANGGYGAVVSYSILVDQTSNLG-NGYVLYGGIGQRQIGILIEARNTY 125
          + +L + G V++ V G V+ GG I + +++
Sbjct 61 -VSGKKLIITRNIQVPNGYVITQVRATDKAADGTGAEATVIGGGPDMEFISLRFKSQRWR 119

Query 126 TFSYIAEIIYG 135
```

Sbjct 120 + ++Y  
GIYFDIQVYA 129
