# Supplementary material
Source: PubMed Central journal article supplement (PMC2950210)
Supplement: NIHMS231853-supplement-04.pdf [file NIHMS231853-supplement-04.pdf]

**gi|221768755|gb|ACM40903.1| secreted salivary...**Results for:  [Skip to the first new sequence](#)

Your BLAST job specified more than one input sequence. This box lets you choose which input sequence to show BLAST results for.

Query ID  
gi|221768755|gb|ACM40903.1| secreted salivary protein [Culicoides nubeculosus]

Molecule type  
amino acid

Query Length  
398

Database Name  
nr

Description  
All non-redundant GenBank CDS translations+PDB+SwissProt+PIR+PRF excluding environmental samples from WGS projects [See details](#)

Program  
BLASTP 2.2.22+ [Citation](#)

Sequences with  pattern at position and  E-value BETTER than threshold

|                                     |                                     |                                                   |                     | Score<br>(Bits) | E<br>Value |
|-------------------------------------|-------------------------------------|---------------------------------------------------|---------------------|-----------------|------------|
| <input checked="" type="checkbox"/> | <a href="#">ref XP_002101210.1 </a> | GE17494 [Drosophila yakuba] >gb EDX02318....      | <a href="#">524</a> | 9e-147          | <b>G</b>   |
| <input checked="" type="checkbox"/> | <a href="#">ref XP_001978593.1 </a> | GG17594 [Drosophila erecta] >gb EDV47520....      | <a href="#">522</a> | 3e-146          | <b>G</b>   |
| <input checked="" type="checkbox"/> | <a href="#">ref XP_001963941.1 </a> | GF20993 [Drosophila ananassae] >gb EDV343...      | <a href="#">517</a> | 9e-145          | <b>G</b>   |
| <input checked="" type="checkbox"/> | <a href="#">ref XP_002067370.1 </a> | GK16218 [Drosophila willistoni] >gb EDW78...      | <a href="#">516</a> | 1e-144          | <b>G</b>   |
| <input checked="" type="checkbox"/> | <a href="#">ref XP_002057094.1 </a> | GJ16894 [Drosophila virilis] >gb EDW62580...      | <a href="#">514</a> | 5e-144          | <b>G</b>   |
| <input checked="" type="checkbox"/> | <a href="#">ref XP_002025529.1 </a> | GL15246 [Drosophila persimilis] >gb EDW31...      | <a href="#">513</a> | 2e-143          | <b>G</b>   |
| <input checked="" type="checkbox"/> | <a href="#">ref XP_001355344.2 </a> | GA15301 [Drosophila pseudoobscura pseudo...       | <a href="#">512</a> | 2e-143          | <b>G</b>   |
| <input checked="" type="checkbox"/> | <a href="#">ref XP_002076900.1 </a> | GD24578 [Drosophila simulans] >gb EDX1649...      | <a href="#">511</a> | 4e-143          | <b>G</b>   |
| <input checked="" type="checkbox"/> | <a href="#">ref NP_572427.1 </a>    | lethal (1) G0193, isoform A [Drosophila mela...   | <a href="#">508</a> | 5e-142          | <b>UG</b>  |
| <input checked="" type="checkbox"/> | <a href="#">ref XP_002010644.1 </a> | GI21656 [Drosophila mojavensis] >gb EDW06...      | <a href="#">506</a> | 2e-141          | <b>G</b>   |
| <input checked="" type="checkbox"/> | <a href="#">ref NP_996366.1 </a>    | lethal (1) G0193, isoform B [Drosophila mela...   | <a href="#">501</a> | 4e-140          | <b>UG</b>  |
| <input checked="" type="checkbox"/> | <a href="#">ref XP_001992028.1 </a> | GH24541 [Drosophila grimshawi] >gb EDV917...      | <a href="#">492</a> | 3e-137          | <b>G</b>   |
| <input checked="" type="checkbox"/> | <a href="#">ref XP_001851110.1 </a> | conserved hypothetical protein [Culex qui...      | <a href="#">490</a> | 9e-137          | <b>UG</b>  |
| <input checked="" type="checkbox"/> | <a href="#">ref XP_969643.2 </a>    | PREDICTED: similar to GA15301-PA [Tribolium ...   | <a href="#">484</a> | 9e-135          | <b>UG</b>  |
| <input checked="" type="checkbox"/> | <a href="#">gb EFA08554.1 </a>      | hypothetical protein TcasGA2_TC006209 [Triboli... | <a href="#">478</a> | 4e-133          |            |
| <input checked="" type="checkbox"/> | <a href="#">gb AAV55307.1 </a>      | IP12501p [Drosophila melanogaster]                | <a href="#">478</a> | 5e-133          |            |
| <input checked="" type="checkbox"/> | <a href="#">ref XP_001851111.1 </a> | conserved hypothetical protein [Culex qui...      | <a href="#">475</a> | 4e-132          | <b>G</b>   |
| <input checked="" type="checkbox"/> | <a href="#">ref XP_002077791.1 </a> | GD22890 [Drosophila simulans] >gb EDX0337...      | <a href="#">474</a> | 9e-132          | <b>G</b>   |
| <input checked="" type="checkbox"/> | <a href="#">ref XP_001960321.1 </a> | GF11569 [Drosophila ananassae] >gb EDV371...      | <a href="#">474</a> | 9e-132          | <b>G</b>   |
| <input checked="" type="checkbox"/> | <a href="#">ref XP_002077790.1 </a> | GD22891 [Drosophila simulans] >gb EDX0337...      | <a href="#">474</a> | 1e-131          | <b>G</b>   |
| <input checked="" type="checkbox"/> | <a href="#">gb AAV55318.1 </a>      | IP12601p [Drosophila melanogaster]                | <a href="#">473</a> | 2e-131          |            |

|                                     |                                    |                                                           |                     |        |           |
|-------------------------------------|------------------------------------|-----------------------------------------------------------|---------------------|--------|-----------|
| <input checked="" type="checkbox"/> | <a href="#">gb ACH95281.1</a>      | FI07603p [ <i>Drosophila melanogaster</i> ]               | <a href="#">473</a> | 2e-131 |           |
| <input checked="" type="checkbox"/> | <a href="#">ref NP_722735.1</a>    | CG31664 [ <i>Drosophila melanogaster</i> ] >gb AAF513...  | <a href="#">471</a> | 5e-131 | <b>UG</b> |
| <input checked="" type="checkbox"/> | <a href="#">ref XP_001648416.1</a> | hypothetical protein AaeL_AAEL014309 [Aed...              | <a href="#">470</a> | 1e-130 | <b>UG</b> |
| <input checked="" type="checkbox"/> | <a href="#">ref XP_002087581.1</a> | GE15356 [ <i>Drosophila yakuba</i> ] >gb EDW87293...      | <a href="#">469</a> | 2e-130 | <b>G</b>  |
| <input checked="" type="checkbox"/> | <a href="#">ref XP_001968326.1</a> | GG24571 [ <i>Drosophila erecta</i> ] >gb EDV57385...      | <a href="#">464</a> | 8e-129 | <b>G</b>  |
| <input checked="" type="checkbox"/> | <a href="#">ref XP_002044470.1</a> | GM11959 [ <i>Drosophila sechellia</i> ] >gb EDW536...     | <a href="#">463</a> | 1e-128 | <b>G</b>  |
| <input checked="" type="checkbox"/> | <a href="#">ref XP_001851109.1</a> | conserved hypothetical protein [ <i>Culex qui...</i>      | <a href="#">462</a> | 3e-128 | <b>UG</b> |
| <input checked="" type="checkbox"/> | <a href="#">ref XP_001648417.1</a> | hypothetical protein AaeL_AAEL014309 [Aed...              | <a href="#">462</a> | 3e-128 | <b>UG</b> |
| <input checked="" type="checkbox"/> | <a href="#">ref XP_002015853.1</a> | GL10792 [ <i>Drosophila persimilis</i> ] >gb EDW31...     | <a href="#">462</a> | 4e-128 | <b>G</b>  |
| <input checked="" type="checkbox"/> | <a href="#">gb ACM40903.1</a>      | secreted salivary protein [ <i>Culicoides nubeculo...</i> | <a href="#">459</a> | 4e-127 |           |
| <input checked="" type="checkbox"/> | <a href="#">ref XP_001360382.2</a> | GA15824 [ <i>Drosophila pseudoobscura pseudo...</i>       | <a href="#">456</a> | 2e-126 | <b>G</b>  |
| <input checked="" type="checkbox"/> | <a href="#">ref XP_002092594.1</a> | GE14278 [ <i>Drosophila yakuba</i> ] >gb EDW92306...      | <a href="#">451</a> | 7e-125 | <b>G</b>  |
| <input checked="" type="checkbox"/> | <a href="#">ref XP_002427759.1</a> | conserved hypothetical protein [ <i>Pediculus...</i>      | <a href="#">447</a> | 1e-123 | <b>G</b>  |
| <input checked="" type="checkbox"/> | <a href="#">ref XP_001946173.1</a> | PREDICTED: similar to GA15301-PA [ <i>Acyrtho...</i>      | <a href="#">443</a> | 2e-122 | <b>UG</b> |
| <input checked="" type="checkbox"/> | <a href="#">ref XP_001121007.1</a> | PREDICTED: similar to lethal (1) G0193 CG...              | <a href="#">439</a> | 2e-121 | <b>UG</b> |
| <input checked="" type="checkbox"/> | <a href="#">ref XP_002049066.1</a> | GJ21381 [ <i>Drosophila virilis</i> ] >gb EDW60259...     | <a href="#">437</a> | 9e-121 | <b>G</b>  |
| <input checked="" type="checkbox"/> | <a href="#">ref XP_002062683.1</a> | GK19560 [ <i>Drosophila willistoni</i> ] >gb EDW73...     | <a href="#">429</a> | 2e-118 | <b>G</b>  |
| <input checked="" type="checkbox"/> | <a href="#">ref XP_001603409.1</a> | PREDICTED: similar to CG2206-PA [ <i>Nasonia ...</i>      | <a href="#">412</a> | 3e-113 | <b>UG</b> |
| <input checked="" type="checkbox"/> | <a href="#">ref XP_001603438.1</a> | PREDICTED: similar to GA15301-PA [ <i>Nasonia...</i>      | <a href="#">405</a> | 4e-111 | <b>UG</b> |
| <input checked="" type="checkbox"/> | <a href="#">gb EFA08551.1</a>      | hypothetical protein TcasGA2_TC006206 [ <i>Triboli...</i> | <a href="#">397</a> | 2e-108 |           |
| <input checked="" type="checkbox"/> | <a href="#">ref XP_969565.1</a>    | PREDICTED: similar to lethal (1) G0193 CG220...           | <a href="#">392</a> | 4e-107 | <b>UG</b> |
| <input checked="" type="checkbox"/> | <a href="#">ref XP_310721.4</a>    | AGAP000385-PA [ <i>Anopheles gambiae</i> str. PEST] ...   | <a href="#">389</a> | 2e-106 | <b>UG</b> |
| <input checked="" type="checkbox"/> | <a href="#">ref XP_001603377.1</a> | PREDICTED: similar to CG2206-PA [ <i>Nasonia ...</i>      | <a href="#">385</a> | 3e-105 | <b>G</b>  |
| <input checked="" type="checkbox"/> | <a href="#">ref XP_001606530.1</a> | PREDICTED: similar to CG2206-PA [ <i>Nasonia ...</i>      | <a href="#">378</a> | 7e-103 | <b>G</b>  |
| <input checked="" type="checkbox"/> | <a href="#">gb EFA08552.1</a>      | hypothetical protein TcasGA2_TC006207 [ <i>Triboli...</i> | <a href="#">372</a> | 6e-101 |           |
| <input checked="" type="checkbox"/> | <a href="#">gb EFA12872.1</a>      | hypothetical protein TcasGA2_TC010724 [ <i>Triboli...</i> | <a href="#">366</a> | 3e-99  |           |
| <input checked="" type="checkbox"/> | <a href="#">gb ACM40897.1</a>      | putative cysteine endopeptidase [ <i>Culicoides nu...</i> | <a href="#">365</a> | 6e-99  |           |
| <input checked="" type="checkbox"/> | <a href="#">ref XP_001851115.1</a> | conserved hypothetical protein [ <i>Culex qui...</i>      | <a href="#">360</a> | 2e-97  | <b>UG</b> |
| <input checked="" type="checkbox"/> | <a href="#">ref XP_001606517.1</a> | PREDICTED: similar to CG2206-PA [ <i>Nasonia ...</i>      | <a href="#">352</a> | 6e-95  | <b>UG</b> |
| <input checked="" type="checkbox"/> | <a href="#">gb ACZ28336.1</a>      | hypothetical conserved protein [ <i>Simulium nigri...</i> | <a href="#">350</a> | 2e-94  |           |
| <input checked="" type="checkbox"/> | <a href="#">ref XP_001601809.1</a> | PREDICTED: similar to GA15301-PA [ <i>Nasonia...</i>      | <a href="#">347</a> | 1e-93  | <b>G</b>  |
| <input checked="" type="checkbox"/> | <a href="#">ref XP_001600223.1</a> | PREDICTED: similar to GA15301-PA [ <i>Nasonia...</i>      | <a href="#">343</a> | 2e-92  | <b>G</b>  |
| <input checked="" type="checkbox"/> | <a href="#">ref XP_001602724.1</a> | PREDICTED: similar to CG2206-PA [ <i>Nasonia ...</i>      | <a href="#">340</a> | 2e-91  | <b>G</b>  |
| <input checked="" type="checkbox"/> | <a href="#">ref XP_001810077.1</a> | PREDICTED: similar to GA15301-PA [ <i>Triboli...</i>      | <a href="#">337</a> | 1e-90  | <b>UG</b> |
| <input checked="" type="checkbox"/> | <a href="#">gb ACE75210.1</a>      | conserved hypothetical protein [ <i>Glyptapanteles...</i> | <a href="#">330</a> | 2e-88  |           |
| <input checked="" type="checkbox"/> | <a href="#">ref XP_001601835.1</a> | PREDICTED: similar to ef hand protein [Na...              | <a href="#">322</a> | 7e-86  | <b>UG</b> |
| <input checked="" type="checkbox"/> | <a href="#">gb ABY19389.1</a>      | venom protein 2 [ <i>Microctonus hyperodae</i> ]          | <a href="#">314</a> | 1e-83  |           |
| <input checked="" type="checkbox"/> | <a href="#">gb ACZ28338.1</a>      | hypothetical conserved protein [ <i>Simulium nigri...</i> | <a href="#">309</a> | 5e-82  |           |
| <input checked="" type="checkbox"/> | <a href="#">ref XP_001603579.1</a> | PREDICTED: similar to GA15301-PA [ <i>Nasonia...</i>      | <a href="#">308</a> | 5e-82  | <b>UG</b> |
| <input checked="" type="checkbox"/> | <a href="#">gb ACH56860.1</a>      | hypothetical protein [ <i>Simulium vittatum</i> ]         | <a href="#">307</a> | 2e-81  |           |
| <input checked="" type="checkbox"/> | <a href="#">ref XP_002040062.1</a> | GM15999 [ <i>Drosophila sechellia</i> ] >gb EDW569...     | <a href="#">306</a> | 3e-81  | <b>G</b>  |

|                                                |                                    |                                                   |                      |       |           |
|------------------------------------------------|------------------------------------|---------------------------------------------------|----------------------|-------|-----------|
| <input checked="" type="checkbox"/>            | <a href="#">gb ACE75299.1</a>      | conserved hypothetical protein [Glyptapanteles... | <a href="#">306</a>  | 4e-81 |           |
| <input checked="" type="checkbox"/>            | <a href="#">ref XP_001605051.1</a> | PREDICTED: similar to GA15301-PA [Nasonia...      | <a href="#">296</a>  | 2e-78 | <b>UG</b> |
| <input checked="" type="checkbox"/>            | <a href="#">ref XP_967785.2</a>    | PREDICTED: similar to conserved hypothetical...   | <a href="#">275</a>  | 8e-72 | <b>G</b>  |
| <input checked="" type="checkbox"/>            | <a href="#">ref XP_001599112.1</a> | PREDICTED: similar to CG31664-PA [Nasonia...      | <a href="#">241</a>  | 1e-61 | <b>G</b>  |
| <input checked="" type="checkbox"/>            | <a href="#">ref XP_001605439.1</a> | PREDICTED: similar to ENSANGP00000010019 ...      | <a href="#">229</a>  | 4e-58 | <b>G</b>  |
| <input checked="" type="checkbox"/>            | <a href="#">gb ACZ28354.1</a>      | hypothetical protein [Simulium nigrimanum]        | <a href="#">228</a>  | 1e-57 |           |
| <input checked="" type="checkbox"/>            | <a href="#">gb ACH56924.1</a>      | hypothetical protein [Simulium vittatum]          | <a href="#">224</a>  | 2e-56 |           |
| <input checked="" type="checkbox"/>            | <a href="#">gb ACZ28153.1</a>      | hypothetical protein [Simulium nigrimanum]        | <a href="#">215</a>  | 7e-54 |           |
| <input checked="" type="checkbox"/>            | <a href="#">gb ACH56909.1</a>      | hypothetical protein [Simulium vittatum]          | <a href="#">214</a>  | 1e-53 |           |
| <input checked="" type="checkbox"/>            | <a href="#">gb ACH56925.1</a>      | hypothetical protein [Simulium vittatum]          | <a href="#">209</a>  | 3e-52 |           |
| <input checked="" type="checkbox"/>            | <a href="#">gb ACZ28152.1</a>      | hypothetical conserved protein [Simulium nigri... | <a href="#">204</a>  | 1e-50 |           |
| <input checked="" type="checkbox"/>            | <a href="#">gb AAU06548.1</a>      | unknown salivary protein [Culicoides sonorensis]  | <a href="#">202</a>  | 5e-50 |           |
| <input checked="" type="checkbox"/>            | <a href="#">ref XP_002082764.1</a> | GD11752 [Drosophila simulans] >gb EDX0834...      | <a href="#">200</a>  | 2e-49 | <b>G</b>  |
| <input checked="" type="checkbox"/>            | <a href="#">gb ACZ28340.1</a>      | hypothetical conserved protein [Simulium nigri... | <a href="#">196</a>  | 4e-48 |           |
| <input checked="" type="checkbox"/>            | <a href="#">gb AAU06547.1</a>      | unknown salivary protein [Culicoides sonorensis]  | <a href="#">195</a>  | 6e-48 |           |
| <input checked="" type="checkbox"/>            | <a href="#">gb EFA12874.1</a>      | hypothetical protein TcasGA2_TC010726 [Triboli... | <a href="#">193</a>  | 3e-47 |           |
| <input checked="" type="checkbox"/>            | <a href="#">ref XP_002041740.1</a> | GM16585 [Drosophila sechellia] >gb EDW455...      | <a href="#">187</a>  | 3e-45 | <b>G</b>  |
| <input checked="" type="checkbox"/>            | <a href="#">gb AAU06499.1</a>      | unknown salivary protein [Culicoides sonorensis]  | <a href="#">173</a>  | 3e-41 |           |
| <input checked="" type="checkbox"/>            | <a href="#">gb AAU06503.1</a>      | unknown salivary protein [Culicoides sonorensis]  | <a href="#">171</a>  | 1e-40 |           |
| <input checked="" type="checkbox"/>            | <a href="#">gb AAS87304.1</a>      | CG2206-like protein [Drosophila miranda]          | <a href="#">163</a>  | 3e-38 |           |
| <input checked="" type="checkbox"/>            | <a href="#">gb ACZ28339.1</a>      | hypothetical protein [Simulium nigrimanum]        | <a href="#">145</a>  | 5e-33 |           |
| <input checked="" type="checkbox"/>            | <a href="#">gb EFA11732.1</a>      | hypothetical protein TcasGA2_TC002380 [Triboli... | <a href="#">125</a>  | 1e-26 |           |
| <input checked="" type="checkbox"/>            | <a href="#">gb AAR20336.1</a>      | CG2206-like protein [Drosophila pseudoobscura]... | <a href="#">124</a>  | 2e-26 |           |
| <input checked="" type="checkbox"/>            | <a href="#">gb AAU06508.1</a>      | unknown salivary protein [Culicoides sonorensis]  | <a href="#">119</a>  | 7e-25 |           |
| <input checked="" type="checkbox"/>            | <a href="#">gb AAU06510.1</a>      | unknown salivary protein [Culicoides sonorensis]  | <a href="#">107</a>  | 2e-21 |           |
| <input checked="" type="checkbox"/>            | <a href="#">gb AAU06490.1</a>      | unknown salivary protein [Culicoides sonorensis]  | <a href="#">107</a>  | 3e-21 |           |
| <input checked="" type="checkbox"/>            | <a href="#">ref NP_611782.2</a>    | CG30409 [Drosophila melanogaster] >gb AAF469...   | <a href="#">70.5</a> | 4e-10 | <b>UG</b> |
| <input checked="" type="checkbox"/>            | <a href="#">ref XP_001976383.1</a> | GG22842 [Drosophila erecta] >gb EDV56783....      | <a href="#">67.4</a> | 3e-09 | <b>G</b>  |
| <b>NEW</b> <input checked="" type="checkbox"/> | <a href="#">gb ACZ28349.1</a>      | hypothetical conserved protein [Simulium nigri... | <a href="#">65.5</a> | 1e-08 |           |
| <b>NEW</b> <input checked="" type="checkbox"/> | <a href="#">gb ACZ28230.1</a>      | hypothetical secreted protein [Simulium nigrim... | <a href="#">65.5</a> | 1e-08 |           |

Run PSI-Blast iteration 5 with max

Sequences with E-value WORSE than threshold

|                          |                                    |                                                   |                      |       |           |
|--------------------------|------------------------------------|---------------------------------------------------|----------------------|-------|-----------|
| <input type="checkbox"/> | <a href="#">gb ACZ28321.1</a>      | hypothetical protein [Simulium nigrimanum]        | <a href="#">52.0</a> | 1e-04 |           |
| <input type="checkbox"/> | <a href="#">ref XP_001430683.1</a> | hypothetical protein [Paramecium tetraure...      | <a href="#">39.7</a> | 0.64  | <b>G</b>  |
| <input type="checkbox"/> | <a href="#">gb ACO11777.1</a>      | Serine protease 33 precursor [Lepeophtheirus s... | <a href="#">39.3</a> | 0.89  |           |
| <input type="checkbox"/> | <a href="#">ref ZP_04196096.1</a>  | hypothetical protein bcere0026_8120 [Bacil...     | <a href="#">39.3</a> | 0.91  |           |
| <input type="checkbox"/> | <a href="#">ref XP_001944083.1</a> | PREDICTED: similar to AGAP003506-PA [Acyr...      | <a href="#">39.3</a> | 0.92  | <b>UG</b> |
| <input type="checkbox"/> | <a href="#">emb CAI43276.1</a>     | Isp3b protein [Bacillus thuringiensis]            | <a href="#">38.9</a> | 1.2   |           |

|                          |                                        |                                                   |                      |     |           |
|--------------------------|----------------------------------------|---------------------------------------------------|----------------------|-----|-----------|
| <input type="checkbox"/> | <a href="#">sp P56765.2 ACCD_ARATH</a> | RecName: Full=Acetyl-coenzyme A carbox...         | <a href="#">38.9</a> | 1.2 |           |
| <input type="checkbox"/> | <a href="#">ref NP_051068.1 </a>       | acetyl-CoA carboxylase beta subunit [Arabido...   | <a href="#">38.5</a> | 1.3 | <b>UG</b> |
| <input type="checkbox"/> | <a href="#">ref YP_001123559.1 </a>    | carboxytransferase beta subunit [Draba ne...      | <a href="#">38.5</a> | 1.4 | <b>G</b>  |
| <input type="checkbox"/> | <a href="#">ref YP_001123382.1 </a>    | acetyl-CoA carboxylase beta subunit [Caps...      | <a href="#">38.5</a> | 1.5 | <b>G</b>  |
| <input type="checkbox"/> | <a href="#">ref YP_001271557.1 </a>    | 1-deoxy-D-xylulose-5-phosphate synthase [...      | <a href="#">38.5</a> | 1.5 | <b>G</b>  |
| <input type="checkbox"/> | <a href="#">ref XP_001606911.1 </a>    | PREDICTED: hypothetical protein [Nasonia ...      | <a href="#">38.5</a> | 1.5 | <b>UG</b> |
| <input type="checkbox"/> | <a href="#">ref YP_001843821.1 </a>    | 1-deoxy-D-xylulose-5-phosphate synthase [...      | <a href="#">38.5</a> | 1.6 | <b>G</b>  |
| <input type="checkbox"/> | <a href="#">ref NP_001035549.1 </a>    | shroom family member 4 [Mus musculus] >sp...      | <a href="#">38.1</a> | 1.6 | <b>UG</b> |
| <input type="checkbox"/> | <a href="#">dbj BAD32407.1 </a>        | mKIAA1202 protein [Mus musculus]                  | <a href="#">38.1</a> | 1.9 | <b>G</b>  |
| <input type="checkbox"/> | <a href="#">ref YP_001123471.1 </a>    | acetyl-CoA carboxylase beta subunit [Cruc...      | <a href="#">38.1</a> | 1.9 | <b>G</b>  |
| <input type="checkbox"/> | <a href="#">emb CAM20542.1 </a>        | shroom family member 4 [Mus musculus]             | <a href="#">38.1</a> | 2.0 | <b>G</b>  |
| <input type="checkbox"/> | <a href="#">gb EDL33881.1 </a>         | mCG49121 [Mus musculus]                           | <a href="#">37.7</a> | 2.1 |           |
| <input type="checkbox"/> | <a href="#">gb AAV88247.1 </a>         | Vip3D [Bacillus thuringiensis]                    | <a href="#">37.7</a> | 2.4 |           |
| <input type="checkbox"/> | <a href="#">ref YP_001123124.1 </a>    | acetyl-CoA carboxylase beta subunit [Olim...      | <a href="#">37.7</a> | 2.5 | <b>G</b>  |
| <input type="checkbox"/> | <a href="#">gb ABH10614.1 </a>         | VipS [Bacillus thuringiensis]                     | <a href="#">37.7</a> | 2.5 |           |
| <input type="checkbox"/> | <a href="#">ref ZP_01046841.1 </a>     | TonB-dependent receptor [Nitrobacter sp. N...     | <a href="#">37.4</a> | 2.9 |           |
| <input type="checkbox"/> | <a href="#">ref XP_001426273.1 </a>    | hypothetical protein [Paramecium tetraure...      | <a href="#">37.4</a> | 3.0 | <b>G</b>  |
| <input type="checkbox"/> | <a href="#">gb AAV41427.1 </a>         | vegetative insecticidal protein [Bacillus thur... | <a href="#">37.4</a> | 3.0 |           |
| <input type="checkbox"/> | <a href="#">gb AAH93584.1 </a>         | LOC733205 protein [Xenopus laevis]                | <a href="#">37.4</a> | 3.4 | <b>G</b>  |
| <input type="checkbox"/> | <a href="#">ref NP_001074557.1 </a>    | low density lipoprotein receptor-related ...      | <a href="#">37.4</a> | 3.6 | <b>UG</b> |
| <input type="checkbox"/> | <a href="#">ref YP_001123646.1 </a>    | acetyl-CoA carboxylase beta subunit [Lepi...      | <a href="#">37.0</a> | 4.2 | <b>G</b>  |
| <input type="checkbox"/> | <a href="#">gb AAL69542.1 </a>         | Vip3A [Bacillus thuringiensis] >gb AAO32350.1 ... | <a href="#">37.0</a> | 4.4 |           |
| <input type="checkbox"/> | <a href="#">ref YP_001123208.1 </a>    | carboxytransferase beta subunit [Arabis h...      | <a href="#">37.0</a> | 4.5 | <b>G</b>  |
| <input type="checkbox"/> | <a href="#">ref XP_606509.3 </a>       | PREDICTED: similar to Proprotein convertase ...   | <a href="#">37.0</a> | 4.6 | <b>UG</b> |
| <input type="checkbox"/> | <a href="#">gb EDL27035.1 </a>         | mCG129621 [Mus musculus]                          | <a href="#">37.0</a> | 4.7 |           |
| <input type="checkbox"/> | <a href="#">ref YP_001123823.1 </a>    | acetyl-CoA carboxylase beta subunit [Nast...      | <a href="#">37.0</a> | 4.7 | <b>G</b>  |
| <input type="checkbox"/> | <a href="#">ref XP_001104098.1 </a>    | PREDICTED: low density lipoprotein-relate...      | <a href="#">36.6</a> | 4.7 | <b>UG</b> |
| <input type="checkbox"/> | <a href="#">gb AAV88965.1 </a>         | unknown [Homo sapiens]                            | <a href="#">36.6</a> | 4.7 | <b>G</b>  |
| <input type="checkbox"/> | <a href="#">ref NP_004516.2 </a>       | low density lipoprotein-related protein 2 pr...   | <a href="#">36.6</a> | 5.0 | <b>UG</b> |
| <input type="checkbox"/> | <a href="#">gb EAX11280.1 </a>         | low density lipoprotein-related protein 2 [Hom... | <a href="#">36.6</a> | 5.0 | <b>G</b>  |
| <input type="checkbox"/> | <a href="#">gb AAP88586.1 </a>         | glycoprotein receptor gp330/megalin precursor ... | <a href="#">36.6</a> | 5.0 | <b>G</b>  |
| <input type="checkbox"/> | <a href="#">gb AAP88585.1 </a>         | glycoprotein receptor gp330/megalin precursor ... | <a href="#">36.6</a> | 5.0 | <b>G</b>  |
| <input type="checkbox"/> | <a href="#">gb AAB41649.1 </a>         | gp330 precursor [Homo sapiens]                    | <a href="#">36.6</a> | 5.0 | <b>G</b>  |
| <input type="checkbox"/> | <a href="#">ref XP_001104179.1 </a>    | PREDICTED: low density lipoprotein-relate...      | <a href="#">36.6</a> | 5.1 | <b>UG</b> |
| <input type="checkbox"/> | <a href="#">ref XP_001023022.1 </a>    | Giardia variant-specific surface protein ...      | <a href="#">36.6</a> | 5.4 | <b>G</b>  |
| <input type="checkbox"/> | <a href="#">ref XP_786902.2 </a>       | PREDICTED: similar to G protein-coupled rece...   | <a href="#">36.6</a> | 5.5 | <b>G</b>  |
| <input type="checkbox"/> | <a href="#">ref YP_001123295.1 </a>    | carboxytransferase beta subunit [Barbarea...      | <a href="#">36.6</a> | 6.0 | <b>G</b>  |
| <input type="checkbox"/> | <a href="#">ref XP_001156482.1 </a>    | PREDICTED: low density lipoprotein-relate...      | <a href="#">36.2</a> | 6.1 | <b>UG</b> |
| <input type="checkbox"/> | <a href="#">ref XP_001459453.1 </a>    | hypothetical protein [Paramecium tetraure...      | <a href="#">36.2</a> | 6.4 | <b>G</b>  |
| <input type="checkbox"/> | <a href="#">ref XP_515882.2 </a>       | PREDICTED: low density lipoprotein-related p...   | <a href="#">36.2</a> | 6.8 | <b>UG</b> |
| <input type="checkbox"/> | <a href="#">ref XP_001580470.1 </a>    | hypothetical protein [Trichomonas vaginal...      | <a href="#">36.2</a> | 7.0 | <b>G</b>  |

|                          |                                     |                                                 |                      |     |                                                                                     |
|--------------------------|-------------------------------------|-------------------------------------------------|----------------------|-----|-------------------------------------------------------------------------------------|
| <input type="checkbox"/> | <a href="#">gb ABI18031.1 </a>      | acetyl co-A carboxylase [Ongokea gore]          | <a href="#">35.8</a> | 8.5 |                                                                                     |
| <input type="checkbox"/> | <a href="#">ref XP_001426265.1 </a> | hypothetical protein [Paramecium tetraure...    | <a href="#">35.8</a> | 9.5 |  |
| <input type="checkbox"/> | <a href="#">ref XP_397194.3 </a>    | PREDICTED: similar to distracted CG5634-PA [... | <a href="#">35.8</a> | 9.6 |  |

10000

Run PSI-Blast iteration 5 with max

Go

[Alignments](#)  Select All [Get selected sequences](#) [Distance tree of results](#) [Multiple alignment](#) **NEW**

>  [ref|XP\\_002101210.1|](#)  GE17494 [Drosophila yakuba]

[gb|EDX02318.1|](#)  GE17494 [Drosophila yakuba]

Length=844

[GENE ID: 6525374 Dyak\GE17494](#) | GE17494 gene product from transcript GE17494-RA [Drosophila yakuba] (10 or fewer PubMed links)

Score = 524 bits (1349), Expect = 9e-147, Method: Composition-based stats.  
Identities = 111/405 (27%), Positives = 180/405 (44%), Gaps = 45/405 (11%)

```

Query 6   LGFSRTLDNVPKEHIKGETYEEITRFNQVYFTQEANFG---SCNSKCEDYAAPRHNFKE 62
          L  R  +  DP +H++G TY+E+TR  Q  Y  E  +  +C  C  Y  +  R
Sbjct 455  LRADRIVYRCDDPPKHVQGVTYDEVTRLLQGYIENEVDLNEETCRETCSFYQSTRSEGCF 514

Query 63  DNRYKFPQRQCTGTIYNCIGEKITEKEFPVIRYQIKKPESPESDKRYYYVELPVNTDKKKY 122
          +  Y  Q  +CTG  +YNC          V          P          S  +RY  ++E
Sbjct 515  KDLYCSRQPKCTGRLYNCQ-----FVDSMMWVCPSPQNSTRRYEFIE----- 556

Query 123 QYAIIEGSNYTYRYVYGNKEHSDHTTVNFDTWIRGF-VRCDICRCLCDESKDSESIRSFS 181
          Y  V  G  +  T  D+W  R  C  C  CLCDE  +  +S  R  F+
Sbjct 557  -----YENGRVLGQRGKCTRGTTKVDSWWRYLLWHCSYCFCLCDE-EGLKSDRFFN 606

Query 182 LNAVESDTKDNKVVIGVQLALKDKIFYFKIRQSPLLPLGKADQRKLSWKSDDPSLS---- 237
          L  +D  K  N++V  G++  +++IF+  +I++  LLP  G  +Q  L  WK  +
Sbjct 607  LRDTVADVKNRNRIVTGLRFVKQNRIFHLQIQEGELLPRGTVNQSTLEWKPVKEYNIFDRH 666

Query 238 -SASKDIFKLDVNKRSIHIGSATSNSLSDFFVTGVKFAEIDGNLALGVKLTKFDVMSGKLM 296
          D  KL  KR+I  +  +  +  FV+TGV+F  +  +L  L  ++FD  +GKL+
Sbjct 667  VKNGIDYHKLSYEKRTIDLDDVDTEDNSFVITGVRFRVVGTHLNLEAYYSEFDFRTGKLI 726

Query 297 ND--NNQWIYNSLSK-----QKLNNGGVANRPIKFTDNHASEKLDLGLVEFRQSDLKDDV 349
          N+  W  N  +  ++  +  A+  +  +  ++F  +  L  D
Sbjct 727  QPEANSYWKSNDNTDVSGARREKLSLNNADVSTRTVVAHSIPLSRHNQYIDFTNTGLDKDA 786

Query 350 GQSTVPFIDLRSIVS-TGTALIGVGLQFRTRDTSGGFIAPVVVTH 393
          QSTVPFID++  +VS  L  G+G+  ++  R+  GGF+  P  ++T+
Sbjct 787  AQSTVPFIDIQDVVSNPPVPLAGIGIYYKGRNGYGGFLGPKIITY 831

```

>  [ref|XP\\_001978593.1|](#)  GG17594 [Drosophila erecta]

[gb|EDV47520.1|](#)  GG17594 [Drosophila erecta]

Length=844

[GENE ID: 6551613 Dere\GG17594](#) | GG17594 gene product from transcript GG17594-RA [Drosophila erecta] (10 or fewer PubMed links)

Score = 522 bits (1344), Expect = 3e-146, Method: Composition-based stats.  
Identities = 111/405 (27%), Positives = 176/405 (43%), Gaps = 45/405 (11%)

```

Query 6   LGFSRTLDNVPKEHIKGETYEEITRFNQVYFTQEANFG---SCNSKCEDYAAPRHNFKE 62
          L  R  +  DP +H++G TY+E+TR  Q  Y  E  +  +C  C  Y  +  R
Sbjct 455  LRADRIVYRCDDPPKHVQGVTYDEVTRLLQGYIENEVDLNEETCRETCSFYQSTRSEGCF 514

```

```

Query 63  DNRYKFPQRQCTGTIYNCIGEKITEKEFPVIRYQIKKPESPEKRYYYVELPVNTDKKKY 122
          Y  Q +C+G +YNC          V          P          S +RY Y+E
Sbjct 515  KELYCSRQPKCSGRLYNCQ-----FVDSMDWVCPSPQNSTRRYEYIE----- 556

Query 123  QYAIIEGNSNYTYRYVYGNKEHSDHTTVNFDTWIRGF-VRCDICRCLCDESKDSESIRSFS 181
          Y  V G +          T  D+W R          C  C CLCDE + +S R F+
Sbjct 557  -----YENGRVLGKRGKCTRGTTKVDSWWRYLWHSYCFCLCDE-EGLKSDRFFN 606

Query 182  LNAVESDTKDNKVVIGVQLALKDKIFYFKIRQSPLPLGKADQRKLSWKSDDPSL----- 236
          L  +D K N+VV G++  +++IF+ +I++  LLP G  +Q  L WK  +
Sbjct 607  LRDTIADVKNRNVVTGLRFVKQNRIFHLQIQEGELLPRGTVNQSTLEWKPVKEYNVFDRH 666

Query 237  SSASKDIFKLDVNKRSIHIGSATSNSLDFVVTGVKFAEIDGNLALGVKLTKFDVMSGKLM 296
          D  KL  R+I +  +  + FVVTGV+F  I  +L L  ++FD +G+L+
Sbjct 667  VKNGVDYHKLSYENRTIDLDDVDTEDNSFVVTGVRFRVIGTHLNLEAYYSEFDRTGQLI 726

Query 297  ND--NNQWIYNSLSKQKLN-----NGGVANRPIKFTDNHASEKLDLGLVEFRQSDLKDDV 349
          N+ W N  +          N  A+  +          ++F  +  +  D
Sbjct 727  QPEGNSYKWSNDNTDVGTRRQKLNLNADVSTRTIAPSIPLSRHNQYIDFTNTGMDKDA 786

Query 350  GQSTVPFIDLRSIVS-TGTALIGVGLQFRTRDTSGGFIAPVVVTH 393
          QSTVPFID++ ++S          L G+G+ ++ R++ GGF+ P ++T+
Sbjct 787  AQSTVPFIDIQDVISNPPVPLAGIGIYYKGRNSYGGFLGPKIITY 831

```

> [ref|XP\\_001963941.1|](#)  GF20993 [Drosophila ananassae]

[gb|EDV34390.1|](#)  GF20993 [Drosophila ananassae]

Length=851

[GENE ID: 6503682 Dana\GF20993](#) | GF20993 gene product from transcript GF20993-RA [Drosophila ananassae] (10 or fewer PubMed links)

Score = 517 bits (1331), Expect = 9e-145, Method: Composition-based stats.  
Identities = 111/406 (27%), Positives = 178/406 (43%), Gaps = 46/406 (11%)

```

Query 6  LGFSRTLNDVDPKEHIKGETYEEITRFNQVYFTQEANFG---SCNSKCEDYAAPRHNFKE 62
          L  R +  DP +HI  TY+E+TR  Q Y  E +  +C  C+ Y + R
Sbjct 461  LRADRIVYRCPPKHIPKVTYDEVTRLLQGYVENEVDLNEETCRETCDFYQSTRAEGCF 520

Query 63  DNRYKFPQRQCTGTIYNCIGEKITEKEFPVIRYQIKKPESPEKRYYYVELPVNTDKKKY 122
          +Y  Q++C+G IYNC          +          P          S +RY ++E
Sbjct 521  KEKYCARQQRCSGRYIYNCQ-----FIDSDMWVCPSPQNSTRRYEFIE----- 562

Query 123  QYAIIEGNSNYTYRYVYGNKEHSDHTTVNFDTWIRGF-VRCDICRCLCDESKDSESIRSFS 181
          Y  V G +          T  D+W R          C  C CLCDE + +S R F+
Sbjct 563  -----YESGRVLGQRTKCHRGTTKVDSWWRYLWHSYCFCLCDE-QGLKSDRFFN 612

Query 182  LNAVESDTKDNKVVIGVQLALKDKIFYFKIRQSPLPLGKADQRKLSWKSDDPSLS---- 237
          L  +D K N+VV G++L  ++IF+ +I++  L+P G  +Q  L W+  +
Sbjct 613  LRDSIADVKKNRVVTGLRLVKSNRIFHLQIQEGELMPRGVINQSTLEWRPVEKYNIFDRD 672

Query 238  -SASKDIFKLDVNKRSIHIGSATSNSLDFVVTGVKFAEIDGNLALGVKLTKFDVMSGKLM 296
          D  L  RSI +  ++  + FVVTGV+F  +  +L L  T+FD +GKL+
Sbjct 673  VKKGVYHTLSYESRSIDLDDVNTDDNSFVVTGVRFRVLVGAHLNLEAYFTEFDFTGKLI 732

Query 297  ND--NNQWIYNSLSK-----QKLNNGGVANRPIKFTDNHASEKLDLGLVEFRQSDLKDD 348
          N+ W N  +          ++          + P  +          +          ++F  +  L  D
Sbjct 733  QPEINSYKWSNDNTDVGGARREKRLRLANTDLPTRTIATSLVQSRHNQYIDFTNTGLDKD 792

Query 349  VGQSTVPFIDLRSIVS-TGTALIGVGLQFRTRDTSGGFIAPVVVTH 393
          QSTVPFID++ +VS          L G+G+ ++ R+  GGF+ P ++T+
Sbjct 793  AAQSTVPFIDIQDVSNPPVPLSGIGIYYKGRNGYGGFVGPKIITY 838

```

> [ref|XP\\_002067370.1|](#)  GK16218 [Drosophila willistoni]

[gb|EDW78356.1|](#)  GK16218 [Drosophila willistoni]

Length=711

[GENE ID: 6644823 Dwil\GK16218](#) | GK16218 gene product from transcript GK16218-RA [Drosophila willistoni] (10 or fewer PubMed links)



Score = 516 bits (1330), Expect = 1e-144, Method: Composition-based stats.  
Identities = 109/405 (26%), Positives = 175/405 (43%), Gaps = 46/405 (11%)

```
Query 7 GFSRTLNDVDPKEHIKGETYEEITRFNQVYFTQEANFGS---CNSKCEDYAAPRHNFKED 63
      R + DP +H TY+E+TR Q Y E + + C C Y A R
Sbjct 321 RADRIVWRCDPPKHKAAVYTYDEITRLLQGYIENEVDLNTDETCRETCSFYQATRSEGCFK 380

Query 64 NRYKFPQRQCTGTIYNCIGEKITEKEPVIRYQIKKPESPESDKRYYYVELPVNTDKKKYQ 123
      + Q +C+G +++C V P + S +RY YVE
Sbjct 381 ELFCARQPKCSGRLFDQC-----FVDSMDWVCPAQNSTRRYEYVE----- 421

Query 124 YAIIEGSNYTYRYVYGNKEHSDHTTVNFDTWIRG-FVRCDICRCLCDESKDSESIRSFSL 182
      Y V G + T D+W R F C C C+CDE + +S R F+L
Sbjct 422 -----YENGRVLGQRGQCVRGTTKVDSWWRYLFWHCSYCFMCDE-QGLKSDRFFNL 472

Query 183 NAVESDTKDNKVVIGVQLALKDKIFYFKIRQSPLLPLGKADQRKLSWKSDDPSLS----- 237
      SD K N+VV G++ ++IF+ +I+++ LLP G ++ L W+ D
Sbjct 473 RESLSDVKRNRVVTGLRFVKNRIFHLQIQEAELLPRGAVNESTLEWRKIDSYNIFDRDV 532

Query 238 SASKDIFKLDVNKRSIHIGSATSNLSDFVVTGVKFAEIDGNLALGVKLTKFDVMSGKLMN 297
      D L RSI + ++ + +VVTGV+F + +L L +L++ D +G+L+
Sbjct 533 KKGVDYHTLSYESRSIDLDDIYTDNSYVVTGVRFRVVG AHLNLEARLSELDFRGTGLIQ 592

Query 298 D--NNQWIYNSLSKQKLN-----GGVANRPIKFTDNHASEKLDLGLVEFRQSDLKDDV 349
      N+ W N + ++ A+ P + ++F + L D
Sbjct 593 PEVNSFWKSNNDNTDVS GDDRRKKIPLSNADLPTRTITTSIPISRHNQYIDFTYTGLDKDA 652

Query 350 GQSTVPFIDLRSIVS-TGTALIGVGLQFRTRDTSGGFIAPVVVTH 393
      QSTVPFID++ + S L G+G+ ++ R GGF+AP ++T+
Sbjct 653 AQSTVPFIDIQDVTSKPPVPLSGIGIYYKGRQGYGGFLAPKIITY 697
```

> [ref|XP\\_002057094.1|](#)  GJ16894 [Drosophila virilis]

[gb|EDW62580.1|](#)  GJ16894 [Drosophila virilis]  
Length=824

[GENE ID: 6633805 Dvir\GJ16894](#) | GJ16894 gene product from transcript GJ16894-RA  
[Drosophila virilis] (10 or fewer PubMed links)

Score = 514 bits (1325), Expect = 5e-144, Method: Composition-based stats.  
Identities = 116/405 (28%), Positives = 177/405 (43%), Gaps = 46/405 (11%)

```
Query 7 GFSRTLNDVDPKEHIKGETYEEITRFNQVYFTQEANFGS---CNSKCEDYAAPRHNFKED 63
      R + DP +H+ TY+E+TR Q Y E + S C C Y + R
Sbjct 435 RADRIVWRCDPPKHVPQVYTYDEVTRLLQGYIENEVDLNSDETCRETCAFYQSTRSEGCFK 494

Query 64 NRYKFPQRQCTGTIYNCIGEKITEKEPVIRYQIKKPESPESDKRYYYVELPVNTDKKKYQ 123
      N Y Q +CTG +Y C V P S +RY Y+E
Sbjct 495 NLYCSRQPKCTGKLYGCQ-----FVDSMDWVCPAPLSSTRRYEYIE----- 535

Query 124 YAIIEGSNYTYRYVYGNKEHSDHTTVNFDTWIRGF-VRCIDICRCLCDESKDSESIRSFSL 182
      Y V G +++ T D+W R C C CLCDE + +S R F+L
Sbjct 536 -----YENGRVLGQRKNCVRGTTKVDSWWRYLLWHCSYCFCLCDE-QGLKSDRFFNL 586

Query 183 NAVESDTKDNKVVIGVQLALKDKIFYFKIRQSPLLPLGKADQRKLSWKSDDPS-----LS 237
      SD K NKV+ G++ K++IF+ +I++ LLP G ++ LSWK D
Sbjct 587 RESVSDVKQNKVITGLRFLKKNRIFHLQIQEQQLLPRGAINESTLSWKPVDEYKIFDRNV 646

Query 238 SASKDIFKLDVNKRSIHIGSAT-SNLSDFVVTGVKFAEIDGNLALGVKLTKFDVMSGKLM 296
      + D L RSI + ++ + FVVTGV+F + +L L +L+++FD G+L+
Sbjct 647 AKGIDYHTLSYESRSIDLDDIMKTDNSFVVTGVRFRVLGAHLNLEARLSEFDKKGELI 706

Query 297 ND--NNQWIYNSLSKQKLNNG-----VANRPIKFTDNHASEKLDLGLVEFRQSDLKDDV 349
      N+ W N + A+ P + ++F S + D
Sbjct 707 QPEVNSVWQSNNDNTDVS GERRQKLLLYNADVPTRTVVVTSLPLSKHNQYIDFVNSGMDKDA 766

Query 350 GQSTVPFIDLRSIVS-TGTALIGVGLQFRTRDTSGGFIAPVVVTH 393
      QSTVPF+D++ +VS L G+G+ ++ R GGF+AP ++T+
Sbjct 767 AQSTVPFLDIQDVVSQPPVPLAGIGIYYKGRPGYGGFLAPKIITY 811
```

> [ref|XP\\_002025529.1|](#) [G](#) GL15246 [Drosophila persimilis]

[gb|EDW31051.1|](#) [G](#) GL15246 [Drosophila persimilis]

Length=806

[GENE ID: 6600424 Dper\GL15246](#) | GL15246 gene product from transcript GL15246-RA [Drosophila persimilis] (10 or fewer PubMed links)

Score = 513 bits (1321), Expect = 2e-143, Method: Composition-based stats.  
Identities = 110/407 (27%), Positives = 178/407 (43%), Gaps = 48/407 (11%)

```
Query 7 GFSRSLDNDVDPKEHIKGETYEEITRFNQVYFTQEANFG---SCNSKCEDYAAPRHNFKED 63
      R + DPK+H G TY+E+TR Q Y E + +C C Y + R
Sbjct 415 RADRIVWRCDPKKHEAGVTYDEVTRLLQGYIENEVDLNNEETCRETCSFYQSTRSEGCKYK 474

Query 64 NRYKFPQRQCTGTIYNCIGEKITEKEPVIRYQIKKPESPEKRYYYVELPVNTDKKKYQ 123
      + Y Q +C+G +YNC V P S +RY Y+E
Sbjct 475 DLYCARQPRCSGRLYNCQ-----FVDSMDWVCPSPKNSTRRYEYIE----- 515

Query 124 YAIIEGSNYTYRYVYGNKEHSDHTTVNFDTWIRG-FVRCIDICRCLCDESKDSESIRSFSL 182
      Y G + + T D+W R F C C C+CDE + +S R F+L
Sbjct 516 -----YENGRTLGQRANCVRGTTKVDSSWRYLFWHCSYCFMCDE-QGLKSDRFFNL 566

Query 183 NAVESDTKDNKVVIGVQLALKDKIFYFKIRQSPLPLGKADQRKLSWKSDDPSLS----- 237
      SD K N+VV G++ K++IF+ +I++ LLP G + LSWK +
Sbjct 567 REAVSDVKRNRVVTGLRFVKKNRIFHLQIQEGELLPRGGINHTTLSWKPVENYNIFDRDV 626

Query 238 SASKDIFKLDVNRKRSIHIGSATSNSLDFVVTGVKFAEIDGNLALGVKLTDFVMSGKLMN 297
      D L RS+ + ++ + FVVTGV+F + +L L ++FD +G+L+
Sbjct 627 KKGTDYHTLSYESRSVDLDDVNTDDNSFVVTGVRFRVVG AHLNLEACYSEFDKTKGQLLQ 686

Query 298 D--NNQWIYNSLSK-----QKLNNGGVANRPIKFTDNHASEKLDLGLVEFRQSDLKD 347
      N+ W N + ++ + A+ + + +EF + L
Sbjct 687 PEANSYWKSNNDNTDVS GDSKTRREKVSLSNADVSTRITITYSIPQSRHNQYIEFTNTGLDK 746

Query 348 DVGQSTVPFIDLRISIVS-TGTALIGVGLQFRTRDTSGGFIAPVVVTH 393
      D QSTVPPF+D++ ++S L G+G+ ++ R+ GGF+ P ++T+
Sbjct 747 DAAQSTVPPFMDVDVISNPPVPLSGIGIYYKGRNGYGGFLGPKIITY 793
```

> [ref|XP\\_001355344.2|](#) [G](#) GA15301 [Drosophila pseudoobscura pseudoobscura]

[gb|EAL32401.2|](#) GA15301 [Drosophila pseudoobscura pseudoobscura]

Length=806

[GENE ID: 4816053 Dpse\GA15301](#) | GA15301 gene product from transcript GA15301-RA [Drosophila pseudoobscura pseudoobscura] (10 or fewer PubMed links)

Score = 512 bits (1319), Expect = 2e-143, Method: Composition-based stats.  
Identities = 110/407 (27%), Positives = 178/407 (43%), Gaps = 48/407 (11%)

```
Query 7 GFSRSLDNDVDPKEHIKGETYEEITRFNQVYFTQEANFG---SCNSKCEDYAAPRHNFKED 63
      R + DPK+H G TY+E+TR Q Y E + +C C Y + R
Sbjct 415 RADRIVWRCDPKKHEAGVTYDEVTRLLQGYIENEVDLNNEETCRETCSFYQSTRSEGCKYK 474

Query 64 NRYKFPQRQCTGTIYNCIGEKITEKEPVIRYQIKKPESPEKRYYYVELPVNTDKKKYQ 123
      + Y Q +C+G +YNC V P S +RY Y+E
Sbjct 475 DLYCARQPRCSGRLYNCQ-----FVDSMDWVCPSPKNSTRRYEYIE----- 515

Query 124 YAIIEGSNYTYRYVYGNKEHSDHTTVNFDTWIRG-FVRCIDICRCLCDESKDSESIRSFSL 182
      Y G + + T D+W R F C C C+CDE + +S R F+L
Sbjct 516 -----YENGRTLGQRANCVRGTTKVDSSWRYLFWHCSYCFMCDE-QGLKSDRFFNL 566

Query 183 NAVESDTKDNKVVIGVQLALKDKIFYFKIRQSPLPLGKADQRKLSWKSDDPSLS----- 237
      SD K N+VV G++ K++IF+ +I++ LLP G + LSWK +
Sbjct 567 REAVSDVKRNRVVTGLRFVKKNRIFHLQIQEGELLPRGGINHTTLSWKPVENYNIFDRDV 626

Query 238 SASKDIFKLDVNRKRSIHIGSATSNSLDFVVTGVKFAEIDGNLALGVKLTDFVMSGKLMN 297
      D L RS+ + ++ + FVVTGV+F + +L L ++FD +G+L+
Sbjct 627 KKGTDYHTLSYESRSVDLDDVNTDDNSFVVTGVRFRVVG AHLNLEACYSEFDKTKGQLLQ 686

Query 298 D--NNQWIYNSLSK-----QKLNNGGVANRPIKFTDNHASEKLDLGLVEFRQSDLKD 347
      N+ W N + ++ + A+ + + +EF + L
```



Sbjct 687 PEANSYWKSNDNTDVSGDKTRREKVLSLNADVSTRITITYSIPQSRHNQYIEFTNTGLDK 746

Query 348 DVGQSTVPFIDLRSIVS-TGTALIGVGLQFRTRDTSGGFIAPVVVTH 393

D QSTVPF+D++ ++S L G+G+ ++ R+ GGF+ P ++T+

Sbjct 747 DAAQSTVPFMDVQDVISNPPVPLSGIGIYYKGRNGYGGFLGPKIITY 793

>  [ref|XP\\_002076900.1](#)  GD24578 [Drosophila simulans]

[gb|EDX16494.1](#)  GD24578 [Drosophila simulans]

Length=646

[GENE ID: 6740015 Dsim\GD24578](#) | GD24578 gene product from transcript GD24578-RA [Drosophila simulans] (10 or fewer PubMed links)

Score = 511 bits (1317), Expect = 4e-143, Method: Composition-based stats. Identities = 110/405 (27%), Positives = 179/405 (44%), Gaps = 45/405 (11%)

Query 6 LGFSRTLNDVDPKEHIKGETYEEITRFNQVYFTQEANFG---SCNSKCEDYAAPRHNFK 62  
L R + DP +H++G TY+E+TR Q Y E + +C C Y + R

Sbjct 257 LRADRIVYRCDPTKHKVQGVTYDEVTRLLQGYIENEVDLNEETCRETCGFYQSTRSEGCF 316

Query 63 DNRYKFPQRQCTGTIYNCIGEKITEKEPVIYQIKKPESPESDKRYYYVELPVNTDKKKY 122

+ Y Q +CTG +YNC V P S +RY ++E

Sbjct 317 KDLYCSRQPKCTGRLYNCR-----FVDSMWWCPSPQNSTRRYEFIE----- 358

Query 123 QYAIIEGNSNYTYRYVYGNKEHSDHTTVNFDTWIRGF-VRCDICRCLCDESKDSESIRSFS 181

Y V G + T D+W R C C CLCDE + +S R F+

Sbjct 359 -----YENGRVLGQRGKCTRGTTKVDSWWRYLLWHCSYCFCLCDE-EGLKSDRFFN 408

Query 182 LNAVESDTKDNKVVIGVQLALKDKIFYFKIRQSPLLPLGKADQRKLSWKSDDPSL----- 236

L +D K N++V G++ +++IF+ +I++ LLP G +Q L WK +

Sbjct 409 LRDTIADIKRNRIVTGLRFVKQNRIFHLQIQEGELLPRGTVNQSTLEWKPVEKYNVFDHR 468

Query 237 SSASKDIFKLDVNRKSIHIGSATSNSLDFVVTGVKFAEIDGNLALGVKLTKFDVMSGKLM 296

D KL KR+I + + + FVVTGV+F + +L L ++FD ++G+L+

Sbjct 469 VKNGVDYHKLSYEKRTIDLDDVDTEDNSFVVTGVRFRVVGTHLNLEAYYSEFDLTGQLI 528

Query 297 ND--NNQWIYNSLSK-----QKLNNGGVANRPIKFTDNHASEKLDLGLVEFRQSDLKDDV 349

N+ W N + ++ A+ + ++F + L D

Sbjct 529 QPEYNSYWKSNDNTDVSGARREKLRLSNADVSTRTIAPSLPLSRHNQFIDFTNTGLDKDA 588

Query 350 GQSTVPFIDLRSIVS-TGTALIGVGLQFRTRDTSGGFIAPVVVTH 393

QSTVPF+D++ +VS L G+G+ ++ R+ GGF+ P ++T+

Sbjct 589 AQSTVPFMIDIQDVVSNPPVPLAGIGIYYKGRNGYGGFLGPKIITY 633

>  [ref|NP\\_572427.1](#)   lethal (1) G0193, isoform A [Drosophila melanogaster]

[gb|AAF46301.1](#)  lethal (1) G0193, isoform A [Drosophila melanogaster]

[gb|AAL13770.1](#)  LD24308p [Drosophila melanogaster]

[gb|ACL84971.1](#) 1(1)G0193-PA [synthetic construct]

Length=664

[GENE ID: 31712 1\(1\)G0193](#) | lethal (1) G0193 [Drosophila melanogaster]

(Over 10 PubMed links)

Score = 508 bits (1308), Expect = 5e-142, Method: Composition-based stats. Identities = 110/405 (27%), Positives = 181/405 (44%), Gaps = 45/405 (11%)

Query 6 LGFSRTLNDVDPKEHIKGETYEEITRFNQVYFTQEANFG---SCNSKCEDYAAPRHNFK 62

L R + DP +H++G TY+E+TR Q Y E + +C C+ Y + R

Sbjct 275 LRADRIVYRCDPTKHKVQGVTYDEVTRLLQGYIENEVDLNEETCRETCDFYQSTRSEGCF 334

Query 63 DNRYKFPQRQCTGTIYNCIGEKITEKEPVIYQIKKPESPESDKRYYYVELPVNTDKKKY 122

+ Y Q +C+G +YNC V P S +RY ++E

Sbjct 335 KDLYCSRQPKCSGRLYNCR-----FVDSMWWCPSPQNSTRRYEFIE----- 376

Query 123 QYAIIEGNSNYTYRYVYGNKEHSDHTTVNFDTWIRGF-VRCDICRCLCDESKDSESIRSFS 181

Y V G + T D+W R C C CLCDE + +S R F+

Sbjct 377 -----YENGRVLGQRGKCTRGTTKVDSWWRYLLWHCSYCFCLCDE-EGLKSDRFFN 426

Query 182 LNAVESDTKDNKVVIGVQLALKDKIFYFKIRQSPLLPLGKADQRKLSWKSDDPSL----- 236  
 L +D K N+VV G++ +++IF+ +I++ LLP G +Q L WK +  
 Sbjct 427 LRDTIADVKNRNVVTGLRFVVKQNRIFHLQIQEGELLPRGIVNQSTLEWKPVEKYNVFDRH 486

Query 237 SSASKDIFKLDVNRKSIHIGSATSNLSDFVVTGVKFAEIDGNLALGVKLTKFDVMSGKLM 296  
 D KL KR+I + ++ + FVVTGV+F + +L L ++FD +G+L+  
 Sbjct 487 VKNGVDYHKLSYEKRTIDLDDVDTDNSFVVTGVRFRVVGTHLNLEAYYSEFDFRTGQLI 546

Query 297 ND--NNQWIYNSLSK-----QKLNNGGVANRPIKFTDNHASEKLDLGLVEFRQSDLKDDV 349  
 N+ W N + ++ A+ + + ++F + L D  
 Sbjct 547 RPEYNSYWKSNDNTDVGARREKLRLSNADVSTRITIAHSIPLSRHNQYIDFTNTGLDKDA 606

Query 350 GQSTVPFIDLRSIVS-TGTALIGVGLQFRTRDTSGGFIAPVVVTH 393  
 QSTVPPF+D++ +VS L G+G+ ++ R+ GGF+ P ++T+  
 Sbjct 607 AQSTVPFMDIQDVVSNPPVPLAGIGIYYKGRNGYGGFLGPKIITY 651

>  [ref|XP\\_002010644.1](#)  GI21656 [Drosophila mojavensis]

[gb|EDW06299.1](#)  GI21656 [Drosophila mojavensis]  
 Length=727

[GENE ID: 6585004 Dmoj\GI21656](#) | GI21656 gene product from transcript GI21656-RA [Drosophila mojavensis] (10 or fewer PubMed links)

Score = 506 bits (1303), Expect = 2e-141, Method: Composition-based stats.  
 Identities = 113/405 (27%), Positives = 176/405 (43%), Gaps = 46/405 (11%)

Query 7 GFSRSLDNVDPKEHIKGETYEEITRFNQVYFTQEANFG---SCNSKCEDYAAPRHNFKED 63  
 R + DP+ + +TY+E+TR Q Y E + +C C Y + R  
 Sbjct 338 RSDRIVWRCDPEHFVFNKTYDEVTRLLQGYIENEVDLNADETCRETCSFYQSTRSEGCFK 397

Query 64 NRYKFPQRQCTGTIYNCIGEKITEKEPVIRYQIKKPESPESDKRYYYVELPVNTDKKKYQ 123  
 + Q +CTG +YNC V P + S +RY Y+E  
 Sbjct 398 EYFCARQPKCTGRLYNCQ-----FVSDMWVCPAARNSTRRYEYIE----- 438

Query 124 YAIIEGSNYTYRYVYGNKEHS DHTTVNFDTWIRG-FVRCIDICRCLCDESKDSESIRSFSL 182  
 Y V G ++ T D+W R F C C CLCDE + +S R F+L  
 Sbjct 439 -----YENGRVLRQRQCVRGTTKVDSWWRYLFWHCSYCFCLCDE-QGLKSDRFFNL 489

Query 183 NAVESDTKDNKVVIGVQLALKDKIFYFKIRQSPLLPLGKADQRKLSWKSDDPS-----LS 237  
 +D K N VV G++ ++++F+ +I++ LLP G ++ LSWK D  
 Sbjct 490 RESVADVKNNVVTGLRFVKNRNVFHLQIQEQQLLPRGAINESTLSWKPVDEYKIYDRNV 549

Query 238 SASKDIFKLDVNRKSIHIGSAT-SNLSDFVVTGVKFAEIDGNLALGVKLTKFDVMSGKLM 296  
 + D L RSI + ++ FVVTG++F + +L L +LT+FD G+L+  
 Sbjct 550 AKGIDYHTLSYESRSIDLDDIMKTDDYSFVVTGLRFRVLGAHLNLEARLTFDFTKGELI 609

Query 297 ND--NNQWIYNSLSKQKLNNGG-----VANRPIKFTDNHASEKLDLGLVEFRQSDLKDDV 349  
 N+ W N + A+ P + +EF S + D  
 Sbjct 610 QPEVNSVWQSNNDNTDVGERRQKINIYNADVPTRSVVTSSIPMSKHNYIEFVNSGMDKDA 669

Query 350 GQSTVPFIDLRSIVS-TGTALIGVGLQFRTRDTSGGFIAPVVVTH 393  
 QSTVPPF+D++ +VS L G+GL ++ R GGF+AP ++T+  
 Sbjct 670 AQSTVPFLDIQDVVSQPVPVPLAGIGLYYKGRPGYGGFLAPKIITY 714

>  [ref|NP\\_996366.1](#)  lethal (1) G0193, isoform B [Drosophila melanogaster]

[gb|AAS65275.1](#)  lethal (1) G0193, isoform B [Drosophila melanogaster]  
 Length=646

[GENE ID: 31712 1\(1\)G0193](#) | lethal (1) G0193 [Drosophila melanogaster]  
 (Over 10 PubMed links)

Score = 501 bits (1291), Expect = 4e-140, Method: Composition-based stats.  
 Identities = 110/405 (27%), Positives = 181/405 (44%), Gaps = 45/405 (11%)

Query 6 LGFSRSLDNVDPKEHIKGETYEEITRFNQVYFTQEANFG---SCNSKCEDYAAPRHNFKE 62  
 L R + DP +H++G TY+E+TR Q Y E + +C C+ Y + R  
 Sbjct 257 LRADRIVYRCDPKHKVRGVTYDEVTRLLQGYIENEVDLNKEETCRETCDYQSTRSEGCF 316

Query 63 DNRYKFPQRQCTGTIYNCIGEKITEKEPVIRYQIKKPESPESDKRYYYVELPVNTDKKKY 122

```

+ Y Q +C+G +YNC V P S +RY ++E
Sbjct 317 KDLYCSRQPKCSGRLYNCR-----FVDSMDWVCPSPQNSTRRYEFIE----- 358
Query 123 QYAIIEGSNYTYRYVYGNKEHSDHTTVNFDTWIRGF--VRCDICRCLCDESKDSESIRSFS 181
          Y V G + T D+W R C C CLCDE + +S R F+
Sbjct 359 -----YENGRVLGQRGKCTRGTTKVDSWWRYLWHSYCFCLCDE-EGLKSDRFFN 408
Query 182 LNAVESDTKDNKVVIGVQLALKDKIFYFKIRQSPLPLGKADQRKLSWKSDDPSL----- 236
L +D K N+VV G++ +++IF+ +I++ LLP G +Q L WK +
Sbjct 409 LRDTIADVKNRVVTGLRFVKQNRIFHLQIQEGELLPRGIVNQSTLEWKPVEKYNVDFDRH 468
Query 237 SSASKDIFKLDVNRKRSIHIGSATSNLSDFFVVTGVKFAEIDGNLALGVKLTKFDVMSGKLM 296
          D KL KR+I + ++ + FVVTGV+F + +L L ++FD +G+L+
Sbjct 469 VKNGVDYHKLSYEKRTIDLDDVDTDNSFVVTGVRFRVVGTHLNLEAYYSEFDFRTGQLI 528
Query 297 ND--NNQWIYNSLSK-----QKLNNGGVANRPIKFTDNHASEKLDLGLVEFRQSDLKDDV 349
          N+ W N + ++ A+ + + ++F + L D
Sbjct 529 RPEYNSYKSNNDNTDVGARREKLRLSNADVSTRITIAHSIPLSRHNQYIDFTNTGLDKDA 588
Query 350 GQSTVPFIDLRISV--TGTALIGVGLQFRTRDTSGGFIAPVVVTH 393
          QSTVPF+D++ +VS L G+G+ ++ R+ GGF+ P ++T+
Sbjct 589 AQSTVPFMDIQDVVSNPPVPLAGIGIYYKGRNGYGGFLGPKIITY 633

```

> [ref|XP\\_001992028.1](#)  GH24541 [Drosophila grimshawi]

[gb|EDV91735.1](#)  GH24541 [Drosophila grimshawi]  
Length=827

[GENE ID: 6566309 Dgri\GH24541](#) | GH24541 gene product from transcript GH24541-RA [Drosophila grimshawi] (10 or fewer PubMed links)

Score = 492 bits (1267), Expect = 3e-137, Method: Composition-based stats.  
Identities = 114/411 (27%), Positives = 181/411 (44%), Gaps = 48/411 (11%)

```

Query 7 GFSRTLDNVDPKEHIKGETYEEITRFNQVYFTQEANFGS---CNSKCEDYAAPRHNFKED 63
          R + DP++HIK ETY+E+TR Q Y E + + C C+ Y + R +
Sbjct 438 RSDRIVYRCDPQKHINKETYDEVTRLLQGYIVNEVDLNTDDTCRETCDYFQSTRSDSCFK 497
Query 64 NRYKFPQRQCTGTIYNCIGEKITEKEPVIRYQIKKPESPESDKRYYYVELPVNTDKKKYQ 123
          Y Q +CTG IYNC V P +RY Y+E
Sbjct 498 ELYCARQPKCTGKIYNCQ-----FVDSMDWVCPSPLNRSRYEYIE----- 538
Query 124 YAIIEGSNYTYRYVYGNKEHSDHTTVNFDTWIRGF--FVRCDICRCLCDESKDSESIRSFSL 182
          Y G ++ T D+W R F C C CLCDE + +S R F+L
Sbjct 539 -----YENGRTLGQRKTCRGTTKVDSWWRYLFWHCSYCFCLCDE-QGIKSDRFFNL 589
Query 183 NAVESDTKDNKVVIGVQLALKDKIFYFKIRQSPLPLGKADQRKLSWKSDDPS-----LS 237
          +D K NKVV G++ ++++F+ +I++ LLP G + L+WK D
Sbjct 590 RESVADVKNKVVVTGLRFVKRNRVHFLQIQEGQLLPRGSINASTLAWKPVDDYKIFDRNV 649
Query 238 SASKDIFKLDVNRKRSIHIGSAT--SNLSDFVVTGVKFAEIDGNLALGVKLTKFDVMSGKLM 296
          + +D + RSI + + + FVVTGV+F + +L L +L++FD G+L+
Sbjct 650 AKGRDYHTMSYESRSIDLDDIMKMDNSFVVTGVRFRVLGAHLNLEARLSEFDFKRGEV 709
Query 297 ND--NNQWIYNSLSKQKLNNGG-----VANRPIKFTDNHASEKLDLGLVEFRQSDLKDDV 349
          N+ W N + + P + + +EF S + D
Sbjct 710 QPEVNSVWQSNNDNTDVGERRQKLIHNVDPTRTVVSSLVASKHNEYIEFVNSGMDKDA 769
Query 350 GQSTVPFIDLRISV--STGTALIGVGLQFRTRDTSGGFIAPVVVTH--PTYT 397
          QSTVP++D++ +V S L G+G+ ++TR GGF+AP ++T+ +
Sbjct 770 AQSTVPYLDIQDVVSSPPVPLAGIGIYYKTRPGFGGFVAPKIITYDFSPHV 820

```

> [ref|XP\\_001851110.1](#)  conserved hypothetical protein [Culex quinquefasciatus]

[gb|EDS33063.1](#)  conserved hypothetical protein [Culex quinquefasciatus]  
Length=642

[GENE ID: 6041920 CpipJ\\_CPIJ009483](#) | hypothetical protein [Culex quinquefasciatus]

Score = 490 bits (1262), Expect = 9e-137, Method: Composition-based stats.

Identities = 115/405 (28%), Positives = 182/405 (44%), Gaps = 49/405 (12%)

Query 8 FSRTLNDVDPK--EHIKGETYEEITRFNQVYFTQEANFG---SCNSKCEDYA-APRHNFK 61  
 SR DP+ +H +GE++ +ITR Q Y E N +C C Y+ +

Sbjct 259 ASREYWRCDPERSQHKEGESFVQITRLLQGYVENEVNLNRNDTCRKDCAYYSSDVKQEQC 318

Query 62 EDNRYKFPQRQCTGTIYNCIGEKITEKEPVIRYQIKKPESPEKRYYYVELPVNTDKKK 121  
 + + Y Q C+G IY+C E + P + SD+RY Y+E

Sbjct 319 KKDMYCTKQLICSGKIYDC-----EFIDSAMWICPAANNSDRRYEYIE----- 361

Query 122 YQYAIIEGSNYTYRYVYGNKEHSDHTTVNFDTWIRG--FVRCDICRCLCDESKDSESIRSF 180  
 Y V+G K+ T +W R F C C CLCD++K S R

Sbjct 362 -----YENGMVFGQKKTCSRGTTKVKSWWRWLFWHCSNCFCLCDDAKH--SDRYI 409

Query 181 SLNAVESDTKDNKVVIGVQLALKDKIFYFKIRQSPLLPLGKADQRKLSWKSDDPS----- 235  
 ++ SD K+NKVV G++ K++I + ++Q LLP G+ D L W

Sbjct 410 NMRESVSDLKNNKVVGMRFVKKNRILHLIVQQGRLLPRGQIDNGTLEWVPHNYNLLST 469

Query 236 LSSASKDIFKLDVNRKRSIHIGSATSNSLDFVVTGVKFAEIDGNLALGVKLTKFDVMSGKL 295  
 +D L+ N RS+ + +V+TGV+F +D +L L +++T+ D +G+L

Sbjct 470 NVRVGRDYHTLNRNRSLLDLDLQYV-PQGYVLTGVRFRLLDNHLNLEIRMTEIDFATGQL 528

Query 296 MN-DNNQWIYNSLSKQKLN-----NGGVANRPIKFTDNHASEKLDLGLVEFRQSDLKDDV 349  
 ++ D + WI N +++ +N + P+ + ++FR SD D

Sbjct 529 IDPKSIWIGNDNTERTVNRKTEFELDRPHVPLLSLVKSLPDSASNQFIQFRASDRNMDA 588

Query 350 GQSTVPFIDLRSIVS-TGTALIGVGLQFRTRDTSGGFIAPVVVTH 393  
 Q+TVPF D +S+V L G GL + R GGF+AP V+T+

Sbjct 589 AQTTPVFFDAQSVVPKVPVPLSGAGLFHKGRPGFGGFVAPKVMTY 633

>  [ref|XP\\_969643.2](#)  PREDICTED: similar to GA15301-PA [Tribolium castaneum]  
 Length=660

[GENE ID: 658141 LOC658141](#) | similar to CG2206-PB, isoform B  
 [Tribolium castaneum]

Score = 484 bits (1245), Expect = 9e-135, Method: Composition-based stats.  
 Identities = 108/403 (26%), Positives = 171/403 (42%), Gaps = 48/403 (11%)

Query 9 SRTLNDVDPKEHIKGETYEEITRFNQVYFTQEANFG---SCNSKCEDYAAPRHNFKEDNR 65  
 SR L DPK H+ GETY E+T+ Q Y E + +C C +Y + + N

Sbjct 270 SRDLWKCDPKRHVSGETYVEVTQLLQGYIQNEVDLNPEGTRENCAYEYTYTKSHGCFQNL 329

Query 66 YKFPQRQCTGTIYNCIGEKITEKEPVIRYQIKKPESPEKRYYYVELPVNTDKKKYQYA 125  
 + QR+C G + NC V P +RY YVE

Sbjct 330 WCRKQRRCHGKVINCK-----YVSDMWVCPAD-NQSRRYEYVE----- 367

Query 126 IIEGSNYTYRYVYGNKEHSDHTTVNFDTWIRG--FVRCDICRCLCDESKDSESIRSFSLNA 184  
 Y V G K+ T D+W R F C C CLCDE + S R +L A

Sbjct 368 -----YENGRVLGRKQGCRRGTSKVDSWWRWLFWHCSYCFCLCDE-QGVHSDRYINLRA 420

Query 185 VESDTKDNKVVIGVQLALKDKIFYFKIRQSPLLPLGKADQRKLSWKSDDPS-----LSSA 239  
 +D K+N+VV G++ ++I + +I++ LLP G D + W + +

Sbjct 421 SIADIKNNRVVTGLRFVKNRILHLQIQEGKLLPRGNIDVTTVHVVPVEEYKITDSNVAN 480

Query 240 SKDIFKLDVNRKRSIHIGSATSNSLDFVVTGVKFAEIDGNLALGVKLTKFDVMSGKLMNDN 299  
 ++D L KR++ + + +VVTGV+F I +L + T FD +G+L++

Sbjct 481 AQDYHTLTWEKRAVDLDDLVA-DEGYVVTGVRFKVIGSHLNFEIYTPFDFTGQLIDPE 539

Query 300 NQWIY--NSLSK-----QKLNNGGVANRPIKFTDNHASEKLDLGLVEFRQSDLKDDVGQ 351  
 + +Y N + + + + + +EF SD+ D Q

Sbjct 540 TKSMYKDNPNNTDSSLYKPRTRVRLTNPDISTRSPSPSLPDSKTDQYIEFTNSMDMRDAAQ 599

Query 352 STVPFIDLRSIVS-TGTALIGVGLQFRTRDTSGGFIAPVVVTH 393  
 +TVPF+D + + S L G G+ + + GGF+AP ++T+

Sbjct 600 TTVPFLLDAQPVDSLQPVPLSGAGIFHKGQKYFGGF+APKLITY 642

>  [gb|EFA08554.1](#) hypothetical protein TcasGA2\_TC006209 [Tribolium castaneum]  
 Length=640

Score = 478 bits (1231), Expect = 4e-133, Method: Composition-based stats.  
Identities = 108/403 (26%), Positives = 171/403 (42%), Gaps = 48/403 (11%)

```
Query 9 SRTLNDVDPKEHIKGETYEEITRFNQVYFTQEANFG---SCNSKCEDYAAPRHNFKEDNR 65
SR L DPK H+ GETY E+T+ Q Y E + +C C +Y + + N
Sbjct 250 SRDLWKCDPKRHVSGETYVEVETQLLQGYIQNEVDLNPPEGTCRENCAEYTYTKSHGCFQNL 309

Query 66 YKFPQRQCTGTIYNCIGEKITEKEPVIRYQIKKPESPEKRYYYVELPVNTDKKKYQYA 125
+ QR+C G + NC V P +RY YVE
Sbjct 310 WCRKQRCHGKVINCK-----YVSDSMWVCPAD-NQSRRYEYVE----- 347

Query 126 IIEGSNYTYRYVYGNKEHSDHTTVNFDTWIRG-FVRCDICRCLCDESKDSESIRSFSLNA 184
Y V G K+ T D+W R F C C CLCDE + S R +L A
Sbjct 348 -----YENGRVLGRKQGCRRTSKVDSWWRWLFWHCSYCFCLCDE-QGVHSDRYINLRA 400

Query 185 VESDTKDNKVVIGVQLALKDKIFYFKIRQSPLLPLGKADQRKLSWKSDDPS-----LSSA 239
+D K+N+VV G++ ++I + +I++ LLP G D + W + +
Sbjct 401 SIADIKNNRVVVTGLRFVKNRRIIHLQIQEGKLLPRGNIDVTTVHWVPEEYKITDSNVAN 460

Query 240 SKDIFKLDVNRKRSIHIGSATSNSLDFVVTGVKFAEIDGNLALGVKLTKFVMSGKLMNDN 299
++D L KR++ + + +VVTGV+F I +L + T FD +G+L++
Sbjct 461 AQDYHTLTWEKRAVDLDDLVA-DEGYVVTGVRFKVIGSHLNFEIYTFPFDFETGQLIDPE 519

Query 300 NQWIY--NSLSK-----QKLNNGGVANRPIKFTDNHASEKLDLGLVEFRQSDLKDDVQG 351
+ +Y N + + + + + +EF SD+ D Q
Sbjct 520 TKSMYKDNPNNTDSSLYKPRTRVRLTNPDISTRSPSPSLPDSKTDQYIEFTNSMDRDAQA 579

Query 352 STVPFIDLRSIVS-TGTALIGVGLQFRTRDTSGGFIAPVVVTH 393
+TVPF+D + + S L G G+ + + GGFIAF ++T+
Sbjct 580 TTVPFLLDAQPVDSLQVPLSGAGIFHKGQKYFGGFIAPKLITY 622
```

>  [gb|AA55307.1](#) IP12501p [Drosophila melanogaster]  
Length=579

Score = 478 bits (1230), Expect = 5e-133, Method: Composition-based stats.  
Identities = 113/409 (27%), Positives = 187/409 (45%), Gaps = 47/409 (11%)

```
Query 3 LPSLG-----FSRTLNDVDPKEHIKGETYEEITRFNQVYFTQEANFGS---CNSKCEDYA 54
LP + R++ DP+EH G T+EE+TR Q Y E + S CN +C Y
Sbjct 188 LPKIKVLMSQADRSVWRCDPQEHQSGVTHEEVTRLLQGYVENEVDLNSDGACNQCQGYK 247

Query 55 APRHNFKEDNRYKFPQRQCTGTIYNCIGEKITEKEPVIRYQIKKPESPEKRYYYVELP 114
++ DN++ Q +CTG +++C V S +RY +++
Sbjct 248 LAKNEGCFDNKFCSEQPKCTGGVHDCR-----FVESNMKICQAEKNSSRRYEFIK-- 297

Query 115 VNTDKKKYQYAIIEGSNYTYRYVYGNKEHSDHTTVNFDTWIRGFVR-CDICRCLCDESKD 173
Y V+GN++ + +W R C C CLCD+ +
Sbjct 298 -----YESGLVHGNEKPCATWLNLSAKSWNRWLFMECSYCLCLCDD-QS 339

Query 174 SESIRSFSLNAVESDTKDNKVVIGVQLALKDKIFYFKIRQSPLLPLGKADQRKLSWKSDD 233
+S R F+L V +D K+N+VV+G++ +++IF+ +++ LLPLG + L WK D
Sbjct 340 PQSDRYFNLRPVIADVKNRNVVGLRFVKNRIRIFHLQVQEGELLPLGDIINGTTLRWKPV 399

Query 234 PSLSSA-----SKDIFKLDVNRKRSIHIGSATSNSLDFVVTGVKFAEIDGNLALGVKLTKF 288
S + D L KRSI +G + ++ VVTG++F +L L + T
Sbjct 400 SYSISDKDVSENVYHTLTYEKRSIDLGLNAKINS-VVTGLRFRVFGAHLQLEAQFTAV 458

Query 289 DVMSGKLMNDN--NQWIYNSLSKQK-LNNGGVANRPIKFTDNHASEKLDLGLVEFRQSDL 345
+ SGKL++ + WI + + A K + D +EF +
Sbjct 459 EFESGKLIDPKKTSHWISMGTDQPRERLPLMDAQVSTKSSVLSIPYPSDNQFIEFTNTGF 518

Query 346 KDDVQSTVPFIDLRSIVS-TGTALIGVGLQFRTRDTSGGFIAPVVVTH 393
D Q TVPFID++ +VS L G+G+ ++ +D GGF+AP ++T+
Sbjct 519 VQDAAQRTVPFIDIQDVVSDPPVPLSGIGIYYKQDGYGGFLAPRIITY 567
```

>  [ref|XP\\_001851111.1](#)  conserved hypothetical protein [Culex quinquefasciatus]  
[gb|EDS33064.1](#)  conserved hypothetical protein [Culex quinquefasciatus]  
Length=721

GENE ID: 6041924 CpipJ\_CPIJ009484 | hypothetical protein  
[Culex quinquefasciatus]

Score = 475 bits (1222), Expect = 4e-132, Method: Composition-based stats.  
Identities = 106/405 (26%), Positives = 176/405 (43%), Gaps = 48/405 (11%)

```
Query 8 FSRTLNDVDP--KEHIKGETYEEITRFNQVYFTQEANFGS---CNSKCEDYA-APRHNFK 61
S DP ++H +GET+ ++TR Q Y E + C C Y+ +
Sbjct 322 ASPAYWRCDPVQRQKHEGETFVQLTRLLQGYVENEVALNTDNTCKETCGYYSWGVQQERC 381

Query 62 EDNRYKFPQRQCTGTIYNCIGEKITEKEPVIRYQIKKPESPEKRYYYVELPVNTDKKK 121
+ Y Q +C+G IY+C + + + P + +++RY YVE
Sbjct 382 YKDTYCSKQSKSCSGKIYDC-----DFIDSHMWICPAAKNTNRRYEYVE----- 424

Query 122 YQYAIIEGSNYTYRYVYGNKEHSHTTVNFDTWIRGF-VRCDICRCLCDESKDSESIRSF 180
Y V G+++ T ++W R RC C CLCD++ S R
Sbjct 425 -----YENGIVLGHKQCASGTTKVESWWRWLIWRCSYCFCLCDDA-GKNSDRYI 473

Query 181 SLNAVESDTKDNKVVIGVQLALKDKIFYFKIRQSPLLPLGKADQRKLSWKSDDPS----- 235
++ SD +NKVV G++ K +I + ++Q LLP G+ D L W
Sbjct 474 NMRESVSDVMNNKVVGMRFIKKSI IHLIVQQGRLLPRGQIDNGTLEWVQPHNYTVMSQ 533

Query 236 LSSASKDIFKLDVNRKRSIHIGSATSNSLDFVVTGVKFAEIDGNLALGVKLTDFVMSGKL 295
+D L+ N RS+ + +VVTGV+F + +L L +++T+ D +G+L
Sbjct 534 NVRNGRDYHTLNRNRRSLDLDLDDLYV-PQGYVVTGVRFRLLGNHLNLEIRMTEKDFATGQL 592

Query 296 MND-NNQWIYNSLSKQKLN-----NGGVANRPIKFTDNHASEKLDLGLVEFRQSDLKDDV 349
++ + WI N +++ +N N P+ + + FR+SD + D
Sbjct 593 IDPEKSIWIGNVNTERSVNRKTEIKLDQPNVPLLSPLKSEPSFVSNRFRFRESDRRTDA 652

Query 350 GQSTVPFIDLRSIYS-TGTALIGVGLQFRTRDTSGGFIAPVVVTH 393
Q+TVPF D + + L G GL + R GGF+AP V+T+
Sbjct 653 AQTTPVFFDAQPVAPVKPVPLSGAGLFHKGRPKFGGFVAPKVMY 697
```

>  [ref|XP\\_002077791.1](#)  GD22890 [Drosophila simulans]  
[gb|EDX03376.1](#)  GD22890 [Drosophila simulans]  
Length=490

GENE ID: 6730612 Dsim\GD22890 | GD22890 gene product from transcript GD22890-RA  
[Drosophila simulans] (10 or fewer PubMed links)

Score = 474 bits (1219), Expect = 9e-132, Method: Composition-based stats.  
Identities = 114/409 (27%), Positives = 188/409 (45%), Gaps = 47/409 (11%)

```
Query 3 LPSLG-----FSRTLNDVDPKEHIKGETYEEITRFNQVYFTQEANFGS---CNSKCEDYA 54
LP + R++ DP+EH G TYEE+TR Q Y E + S CN C Y
Sbjct 91 LPKIKVLMQAERSVWRCDPQEHQSGVTYEEVTRLLQGYVENEVDLNSDGACNHDCGYYN 150

Query 55 APRHNFKEDNRYKFPQRQCTGTIYNCIGEKITEKEPVIRYQIKKPESPEKRYYYVELP 114
+ ++ DN++ Q +CTG +++C V S +RY +++
Sbjct 151 SAKNEGCFDNKFCSEQPKCTGGVHDCR-----FVESSMQICQAEKNSSRRYEFIK-- 200

Query 115 VNTDKKKYQYAIIEGSNYTYRYVYGNKEHSHTTVNFDTWIRGF-VRCDICRCLCDESKD 173
Y V+GN++ + +W R + C C CLCD+ +
Sbjct 201 -----YESGLVHGNEKPCASWLTSAKSWNRWLIMECSYCLCCLDD-QS 242

Query 174 SESIRSFSLNAVESDTKDNKVVIGVQLALKDKIFYFKIRQSPLLPLGKADQRKLSWKSDD 233
+S R F+L V +D +NKVV+G++ +++IF+ +I++ LLPLG ++ L WK D
Sbjct 243 PQSDRYFNLRPVIADVDNKNVVVGLRFRVKNRIRIFHLQIQEGELLPLGAINETTLLWKPVD 302

Query 234 PSLSSA-----SKDIFKLDVNRKRSIHIGSATSNSLDFVVTGVKFAEIDGNLALGVKLTKF 288
S + D L KRSI +G + ++ VVTG++F +L L + T
Sbjct 303 SYSISDKDVSENVYHTLTQKRSIDLGLNNAKINS-VVTGLRFRVFGAHLQLEAQFTAV 361

Query 289 DVMSGKLMNDN--NQWIYNSLSKQKLN--GGVANRPIKFTDNHASEKLDLGLVEFRQSDL 345
+ SGKL++ + WI + + A K + D +EF +
Sbjct 362 EFESGKLVDPKKTSHWISMGTDQPREKLPLMDAQVSTKSSVLSIPYPSDNQFIEFTNTGF 421

Query 346 KDDVGQSTVPFIDLRSIYS-TGTALIGVGLQFRTRDTSGGFIAPVVVTH 393
D Q TVPFID++ +VS L G+G+ ++ ++ GGF+AP ++T+
Sbjct 422 IQDAAQRTVPFIDIQDVVSEPPVPLSGIGIYYKQNGYGGFLAPRLITY 470
```



> [ref|XP\\_001960321.1|](#)  GF11569 [Drosophila ananassae]

[gb|EDV37143.1|](#)  GF11569 [Drosophila ananassae]

Length=662

[GENE ID: 6494433 Dana\GF11569](#) | GF11569 gene product from transcript GF11569-RA [Drosophila ananassae] (10 or fewer PubMed links)

Score = 474 bits (1219), Expect = 9e-132, Method: Composition-based stats.  
Identities = 109/404 (26%), Positives = 164/404 (40%), Gaps = 47/404 (11%)

```
Query 10  RTLDNVP--KEHIKGETYEEITRFNQVYFTQEANFGS---CNSKCEDYAAPRHNFK-- 62
          R  DP  H++GET+ +TR  Q Y  E N  S  C + C+DY  N
Sbjct 275  RRYWRCDPAKDRHVEGETFARVTRLLQGYVENEINLNSDQSCWNSCDDYHDTLSNGCYQP 334

Query 63  DNRYKFPQRQCTGTIYNCIGEKITEKEPVIRYQIKKPESPEKRYYYVELPVNTDKKKY 122
          +   Q  C G +YNC          +   P S  +RY Y+   T
Sbjct 335  EEDLCGQQPPCNGRLYNC-----AFIDSALTICPASENGTRRYEYIHYGDGTSLG-- 384

Query 123 QYAIIEGSNYTYRYVYGNKEHSDHTTVNFDTWIRGF-VRCDICRCLCDESKDSESIRSFS 181
          G          +W R  +RC  C CLCDE  +S R F+
Sbjct 385  -----GKSAGCKSKEKEAASWSRWVVMRCHYCFCLCDEP-GPKSDRYFN 427

Query 182  LNAVESDTKDNKVVIGVQLALKDKIFYFKIRQSPLLPLGKADQRKLSWKSDDPSL----- 236
          L A  SD  N++V  GV+   ++F+ +++Q+ L+P G  +   L W  D
Sbjct 428  LRASMSDFMRNRIVTGVRFVKSRRVFLHLQLQQAQLVPWGAINSTLEWLPLDDYNVSDAD 487

Query 237  SSASKDIFKLDVNKRSIHIGSATSNLSDFVVTGVKFAEIDGNLALGVKLTKFDVMSGKLM 296
          D  L  + RS+ +   +N +D VVTGV+F  I+ +L L V+ T F+  +G L+
Sbjct 488  IRNDYDYHTLGPDSRSLDLDEIVANATDQVVTGVRFRINKHLNLEVRFTPFNFSTGLLV 547

Query 297  NDN--NQWIYNSLSKQKLNN---GGVANRPIKFTDNHASEKLDLGLVEFRQSDLKDDVG 350
          + W+ N+ S          A+ P          ++F  S  + DV
Sbjct 548  EPQTMFSLGNNSHVDGKRQKLVLEADLPTASEMPSLPLSQTNQYMFVSSSRQKDVA 607

Query 351  QSTVPFIDLRISVSTG-TALIGVGLQFRTRDTSGGFIAPVVVTH 393
          Q+T+PFID++ +V   L G+G+  + R   GGF AP VVT+
Sbjct 608  QNTLPFIDIQEVVPHPAVPLSGLGIFHKGRSGYGGFFAPKVVTY 651
```

> [ref|XP\\_002077790.1|](#)  GD22891 [Drosophila simulans]

[gb|EDX03375.1|](#)  GD22891 [Drosophila simulans]

Length=490

[GENE ID: 6730611 Dsim\GD22891](#) | GD22891 gene product from transcript GD22891-RA [Drosophila simulans] (10 or fewer PubMed links)

Score = 474 bits (1219), Expect = 1e-131, Method: Composition-based stats.  
Identities = 113/409 (27%), Positives = 188/409 (45%), Gaps = 47/409 (11%)

```
Query 3  LPSLG-----FSRTLDNVPKEHIKGETYEEITRFNQVYFTQEANFGS---CNSKCEDYA 54
          LP +          R++  DP+EH  G TYEE+TR  Q Y  E +  S  CN  C  Y
Sbjct 91  LPKIKVLMQAERSVWRCDPQEHQSGVTYEEVTRLLQGYVENEVDLNSDGACNHDCGYYN 150

Query 55  APRHNFKEDNRYKFPQRQCTGTIYNCIGEKITEKEPVIRYQIKKPESPEKRYYYVELP 114
          + ++  DN++  Q +CTG +++C          V          S +RY +++
Sbjct 151  SAKNEGCFDNKFCSEQPKCTGGVHDCR-----FVESSMQICQAEKNSSRRYEFIK-- 200

Query 115 VNTDKKKYQYAIIEGSNYTYRYVYGNKEHSDHTTVNFDTWIRGF-VRCDICRCLCDESKD 173
          Y  V+GN++          + +W R  + C  C CLCD+ +
Sbjct 201  -----YESGLVHGNEKPCASWLTSAKSWNRWLIMECSYCLCLCDD-QS 242

Query 174  SESIRSFSLNAVESDTKDNKVVIGVQLALKDKIFYFKIRQSPLLPLGKADQRKLSWKSDD 233
          +S R F+L  V +D  +N+VV+G++  +++IF+ +I++  LLPLG  ++  L WK  D
Sbjct 243  PQSDRYFNLRPVIADVDNRRVVVGLRFVKNRIRIFHLQIQEGELLPLGAINETTLLWKPV 302

Query 234  PSLSSA-----SKDIFKLDVNKRSIHIGSATSNLSDFVVTGVKFAEIDGNLALGVKLT 288
          S  + D  L  KRSI +G  + ++  VVTG++F  +L L  + T
Sbjct 303  SYSISDKDVSENVDYHTLTYQKRSIDLGLNAKINS-VVTGLRFRVFGAHLQLEAQFTAV 361
```

```
Query 289 DVMSGKLMNDN--NQWIYNLSLKQKLNN--GGVANRPIKFTDNHASEKLDLGLVEFRQSDL 345
+ SGKL++ + WI + + A K + D +EF +
Sbjct 362 EFESGKLVDPKKTSHWISMGTDQPREKLPLMDAQVSTKSSVLSIPYPSDNQFIEFTNTGF 421

Query 346 KDDVGQSTVPPFIDLRISIVS-TGTALIGVGLQFRTRDTSGGFIAPVVVTH 393
D Q TVPFID++ +VS L G+G+ ++ ++ GGF+AP ++T+
Sbjct 422 IQDAAQRTVPFIDIQDVVSEPPVPLSGIGIYYKQNGYGGFLAPRLITY 470
```

```
>  gb|AA55318.1 IP12601p [Drosophila melanogaster]
Length=571
```

```
Score = 473 bits (1217), Expect = 2e-131, Method: Composition-based stats.
Identities = 113/409 (27%), Positives = 187/409 (45%), Gaps = 47/409 (11%)
```

```
Query 3 LPSLG-----FSRTLNDVDPKEHIKGETYEEITRFNQVYFTQEANFGS---CNSKCEDYA 54
LP + R++ DP+EH G T+EE+TR Q Y E + S CN +C Y
Sbjct 180 LPKIKVLMSQADRSVWRCDPQEHQSGVTHEEVTRLLQGYVENEVDLNSDGACNQECGYK 239

Query 55 APRHNFKEDNRYKFPQRQCTGTIYNCIGEKITEKEPVIRYQIKKPESPEQKRYYYVELP 114
++ DN++ Q +CTG +++C V S +RY +++
Sbjct 240 LAKNEGCFDNKFCSEQPKCTGGVHDCR-----FVESNMKICQAEKNSSRRYEFIK-- 289

Query 115 VNTDKKKYQYAIIEGSNYTYRYVYGNKEHSDHTTVNFDTWIRGFVR--CDICRCLCDESKD 173
Y V+GN++ + +W R C C CLCD+ +
Sbjct 290 -----YESGLVHGNEKPCATWLNSAKSWNRWLFMECSYCLCLCDD--QS 331

Query 174 SESIRSFSLNAVESDTKDNKVVIGVQLALKDKIFYFKIRQSPLLPLGKADQRKLSWKSDD 233
+S R F+L V +D K+N+VV+G++ +++IF+ ++++ LLPLG + L WK D
Sbjct 332 PQSDRYFNLRPVIADVKNRNVVGLRFVKNRIRIFHLQVQEGELLPLGDIINGTTLRWKPVD 391

Query 234 PSLSSA-----SKDIFKLDVNRKRSIHIGSATSNSLDFVVTGVKFAEIDGNLALGVKLTKF 288
S + D L KRSI +G + + VVTG++F +L L + T
Sbjct 392 SYSISDKDVSENVYHTLTYEKRSIDLGLDLNAKINS-VVTGLRFRVFGAHLQLEAQFTAV 450

Query 289 DVMSGKLMNDN--NQWIYNLSLKQK-LNNGGVANRPIKFTDNHASEKLDLGLVEFRQSDL 345
+ SGKL++ + WI + + A K + D +EF +
Sbjct 451 EFESGKLIDPKKTSHWISMGTDQPRERLPLMDAQISTKSSVLSIPYPSDNQFIEFTNTGF 510

Query 346 KDDVGQSTVPPFIDLRISIVS-TGTALIGVGLQFRTRDTSGGFIAPVVVTH 393
D Q TVPFID++ +VS L G+G+ ++ +D GGF+AP ++T+
Sbjct 511 VQDAAQRTVPFIDIQDVVSDPPVPLSGIGIYYKQDGYGGFLAPRIITY 559
```

```
>  gb|ACH95281.1 FI07603p [Drosophila melanogaster]
Length=571
```

```
Score = 473 bits (1217), Expect = 2e-131, Method: Composition-based stats.
Identities = 113/409 (27%), Positives = 187/409 (45%), Gaps = 47/409 (11%)
```

```
Query 3 LPSLG-----FSRTLNDVDPKEHIKGETYEEITRFNQVYFTQEANFGS---CNSKCEDYA 54
LP + R++ DP+EH G T+EE+TR Q Y E + S CN +C Y
Sbjct 180 LPKIKVLMSQADRSVWRCDPQEHQSGVTHEEVTRLLQGYVENEVDLNSDGACNQECGYK 239

Query 55 APRHNFKEDNRYKFPQRQCTGTIYNCIGEKITEKEPVIRYQIKKPESPEQKRYYYVELP 114
++ DN++ Q +CTG +++C V S +RY +++
Sbjct 240 LAKNEGCFDNKFCSEQPKCTGGVHDCR-----FVESNMKICQAEKNSSRRYEFIK-- 289

Query 115 VNTDKKKYQYAIIEGSNYTYRYVYGNKEHSDHTTVNFDTWIRGFVR--CDICRCLCDESKD 173
Y V+GN++ + +W R C C CLCD+ +
Sbjct 290 -----YESGLVHGNEKPCATWLNSAKSWNRWLFMECSYCLCLCDD--QS 331

Query 174 SESIRSFSLNAVESDTKDNKVVIGVQLALKDKIFYFKIRQSPLLPLGKADQRKLSWKSDD 233
+S R F+L V +D K+N+VV+G++ +++IF+ ++++ LLPLG + L WK D
Sbjct 332 PQSDRYFNLRPVIADVKNRNVVGLRFVKNRIRIFHLQVQEGELLPLGDIINGTTLRWKPVD 391

Query 234 PSLSSA-----SKDIFKLDVNRKRSIHIGSATSNSLDFVVTGVKFAEIDGNLALGVKLTKF 288
S + D L KRSI +G + + VVTG++F +L L + T
Sbjct 392 SYSISDKDVSENVYHTLTYEKRSIDLGLDLNAKINS-VVTGLRFRVFGAHLQLEAQFTAV 450

Query 289 DVMSGKLMNDN--NQWIYNLSLKQK-LNNGGVANRPIKFTDNHASEKLDLGLVEFRQSDL 345
+ SGKL++ + WI + + A K + D +EF +
Sbjct 451 EFESGKLIDPKKTSHWISMGTDQPRERLPLMDAQISTKSSVLSIPYPSDNQFIEFTNTGF 510
```

Sbjct 451 EFESGKLLDPKKTSHWISMGTDQPRERLPLMDAQVSTKSSVLSIPYPSDNQFIEFTNTGF 510

Query 346 KDDVGQSTVPFIDLRISIVS-TGTALIGVGLQFRTRDTSGGFIAPVVVTH 393

D Q TVPFID++ +VS L G+G+ ++ +D GGF+AP ++T+

Sbjct 511 VQDAAQRTVPFIDIQDVVSDPPVPLSGIGIYYKQDGYGGFLAPRIITY 559

>  [ref|NP\\_722735.1](#)  CG31664 [Drosophila melanogaster]

[gb|AAF51336.2](#)  CG31664 [Drosophila melanogaster]

Length=482

[GENE ID: 33359 CG31664](#) | CG31664 gene product from transcript CG31664-RA [Drosophila melanogaster] (10 or fewer PubMed links)

Score = 471 bits (1213), Expect = 5e-131, Method: Composition-based stats. Identities = 113/409 (27%), Positives = 187/409 (45%), Gaps = 47/409 (11%)

Query 3 LPSLG-----FSRTLNDVDPKEHIKGETYEEITRFNQVYFTQEANFGS---CNSKCEDYA 54

LP + R++ DP+EH G T+EE+TR Q Y E + S CN +C Y

Sbjct 91 LPKIKVLMSQADRSVWRCDPQEHQSGVTHEEVTRLLQGYVENEVDLNSDGACNQECGYK 150

Query 55 APRHNFKEDNRYKFPQRQCTGTIYNCIGEKITEKEPVIRYQIKKPESPEKRYYYVELP 114

++ DN++ Q +CTG +++C V S +RY +++

Sbjct 151 LAKNEGCFDNKFCSEQPKCTGGVHDCR-----FVESNMKICQAEKNSSRRYEFIK-- 200

Query 115 VNTDKKKYQYAIIEGSNYTYRYVYGNKEHSDDHTTVNFDTWIRGFVR-CDICRCLCDESKD 173

Y V+GN++ + +W R C C CLCD+ +

Sbjct 201 -----YESGLVHGNEKPCATWLNLSAKSWNRWLFMECSYCLCLCDD-QS 242

Query 174 SESIRFSLNAVESDTKDNKVVIGVQLALKDKIFYFKIRQSPLLPLGKADQRKLSWKSDD 233

+S R F+L V +D K+N+VV+G++ +++IF+ ++++ LLPLG + L WK D

Sbjct 243 PQSDRYFNLRPVIADVKNRNVVGLRFVKNRIRIFHLQVQEGELLPLGDIINGTTLRWKPV 302

Query 234 PSLSSA-----SKDIFKLDVNRKRSIHIGSATSNSLDFVVTGVKFAEIDGNLALGVKLTKF 288

S + D L KRSI +G + ++ VVTG++F +L L + T

Sbjct 303 SYSISDKDVSENVYHTLYEKRSIDLGLNAKINS-VVTGLRFRVFGAHLQLEAQFTAV 361

Query 289 DVMSGKLMNDN--NQWIYNSLSKQK-LNNGGVANRPKFTDNHASEKLDLGLVEFRQSDL 345

+ SGKL++ + WI + + A K + D +EF +

Sbjct 362 EFESGKLLDPKKTSHWISMGTDQPRERLPLMDAQVSTKSSVLSIPYPSDNQFIEFTNTGF 421

Query 346 KDDVGQSTVPFIDLRISIVS-TGTALIGVGLQFRTRDTSGGFIAPVVVTH 393

D Q TVPFID++ +VS L G+G+ ++ +D GGF+AP ++T+

Sbjct 422 VQDAAQRTVPFIDIQDVVSDPPVPLSGIGIYYKQDGYGGFLAPRIITY 470

>  [ref|XP\\_001648416.1](#)  hypothetical protein AaeL\_AAEL014309 [Aedes aegypti]

[gb|EAT33416.1](#)  conserved hypothetical protein [Aedes aegypti]

Length=663

[GENE ID: 5564091 AaeL\\_AAEL014309](#) | hypothetical protein [Aedes aegypti] (10 or fewer PubMed links)

Score = 470 bits (1209), Expect = 1e-130, Method: Composition-based stats. Identities = 112/405 (27%), Positives = 177/405 (43%), Gaps = 48/405 (11%)

Query 8 FSRTLNDVDPK--EHIKGETYEEITRFNQVYFTQEANFGS---CNSKCEDYA-APRHNFK 61

SR DP +H +GETY ++TR Q Y E + + C C Y R

Sbjct 264 ASREYWRCDPDHSHKHEGETYVQLTRLLQGYVENEVDMNTDNTCKENCAYYNWGVRQEQC 323

Query 62 EDNRYKFPQRQCTGTIYNCIGEKITEKEPVIRYQIKKPESPEKRYYYVELPVNTDKK 121

+ Y Q +C G +Y+C E V P + S++RY ++E

Sbjct 324 YKDLYCSKQPKCAGKMYSC-----EYVSDMWICPAASSSNRRYEFIE----- 366

Query 122 YQYAIIEGSNYTYRYVYGNKEHSDDHTTVNFDTWIRG-FVRCDICRCLCDESKDSESIRSF 180

Y V G K+H T D+W R F C C CLCD+S +S R

Sbjct 367 -----YENGMVMGQKHKCTRGTTKVDSWWRWLFWHCSYCFCLCDDS-GPKSDRYI 415

Query 181 SLNAVESDTKDNKVVIGVQLALKDKIFYFKIRQSPLLPLGKADQRKLSWKSDDPSL---- 236

++ SD +NKVV G++ K++I + +++ LLP G+ D L W +

Sbjct 416 NMRESVSDVMNNKVVTLGRFIKKNRIIFLIVQEGQLLPRGQIDNTTLQWVEPEAYNILSP 475

Query 237 -SSASKDIFKLDVNRKRSIHIGSATSNLSDFFVVTGVKFAEIDGNLALGVKLTkFDVMSGKL 295  
 A D ++ R++ + +VVTGV+F + ++ L V++T+ D SGKL  
 Sbjct 476 YIRAKVDYVMNYENRAMDLDDIILQP-PYVVTGVRFRMLGTHMNLVEMDFGSGKL 534

Query 296 MN-DNNQWIYNSLSKQKLN-----NGGVANRPIKFTDNHASEKLDLGLVEFRQSDLKDDV 349  
 ++ D + W+ + ++ + + PI + ++FR+SD D  
 Sbjct 535 IDPKKSIWVGSdkTEHSEDKRTEMKLDKPHIPILSPTKSVPDSEPNQFIKFRESDRGMDA 594

Query 350 GQSTVPFIDLRSIVST-GTALIGVGLQFRTRDTSGGFIAPVVVTH 393  
 Q+TVPF D + +V + T L G GL + R GGF+AP V T+  
 Sbjct 595 AQTTPVFFDAQPVVPSKQTPPLGGAGLFHKGRPKFGGFMAPRVFTY 639

>  [ref|XP\\_002087581.1](#) |  GE15356 [Drosophila yakuba]  
[gb|EDW87293.1](#) |  GE15356 [Drosophila yakuba]  
 Length=489

[GENE ID: 6526462 Dyak\GE15356](#) | GE15356 gene product from transcript GE15356-RA [Drosophila yakuba] (10 or fewer PubMed links)

Score = 469 bits (1208), Expect = 2e-130, Method: Composition-based stats.  
 Identities = 113/400 (28%), Positives = 188/400 (47%), Gaps = 41/400 (10%)

Query 7 GFSRTLDNVDPKHEHIKGETYEEITRFNQVYFTQEANFGS---CNSKCEDYAAPRHNFKED 63  
 R++ DP EH G TYEE+TR Q Y E + S C+ C Y + R+ D  
 Sbjct 98 RADRSVWRCDPWEHKSGVTYEEVTRLLQGYVENEVDLNSDGVCSRDCGYK SARNEGCFD 157

Query 64 NRYKFPQRQCTGTIYNCIGEKITEKEPVIRYQIKKPESPEsdKRYYYVELPVNTDKKKYQ 123  
 +++ Q +C+G +++C V S +RY ++E  
 Sbjct 158 SKFCSEQPKCSGGVHDCR-----FVESSMKICQAEKTSSRRYEFIE----- 198

Query 124 YAIIEGSNYTYRYVYGNKEHSDHTTVNFDTWIRGFVR-CDICRCLCDESKDSESIRSFSL 182  
 Y V+G +EH D + + +W R C C CLCD+ + ++S R F+L  
 Sbjct 199 -----YKSGLVHGTQEHCDTWSNSAKSWNRWLFMECSYCLCLCDD-QSAQSDRYFNL 249

Query 183 NAVESDTKDNKVVIGVQLALKDKIFYFKIRQSPLPLGKADQRKLSWKSDDPS-----LS 237  
 V +D K+N+VV G++ K++IF+ ++++ LLPLG ++ L WK D  
 Sbjct 250 RPVVADVKNRNVVTGLRFVKKNRIFHLQVQEGELLPLGVINKPTLQWKPVDSYSIFDKNV 309

Query 238 SASKDIFKLDVNRKRSIHIGSATSNLSDFFVVTGVKFAEIDGNLALGVKLTkFDVMSGKLMN 297  
 + + D KL RS+ +G + + VVTG++F + G+L L V+ + + SGKL++  
 Sbjct 310 TDTVDYHKLSYESRSLDLGDVKAENNSAVVTGLRFRVMGGHLQLVQVQFSAVEFESGKLID 369

Query 298 D--NNQWIYNSLSKQKLMN-GGVANRPIKFTDNHASEKLDLGLVEFRQSDLKDDVQGQSTV 354  
 + W +++ A K + D +EF + D QSTV  
 Sbjct 370 PTKTSHWTSLGTQKREKLPLRDAQVSSKSSVPSIPYPSDNQYIEFTNTGFVQDAAQSTV 429

Query 355 PFIDLRSIVSTG-TALIGVGLQFRTRDTSGGFIAPVVVTH 393  
 PFID++ +V+ L G+G+ ++ RD GGF+AP + T+  
 Sbjct 430 PFIDIQDVVTEPAVPLSGIGIYYKGRDGYGGFLAPRLTTY 469

>  [ref|XP\\_001968326.1](#) |  GG24571 [Drosophila erecta]  
[gb|EDV57385.1](#) |  GG24571 [Drosophila erecta]  
 Length=488

[GENE ID: 6543280 Dere\GG24571](#) | GG24571 gene product from transcript GG24571-RA [Drosophila erecta] (10 or fewer PubMed links)

Score = 464 bits (1194), Expect = 8e-129, Method: Composition-based stats.  
 Identities = 111/415 (26%), Positives = 186/415 (44%), Gaps = 50/415 (12%)

Query 3 LPSLG-----FSRTLDNVDPKHEHIKGETYEEITRFNQVYFTQEANFG---SCNSKCEDYA 54  
 LP + R++ DP +H G TYEE+TR Q Y E + +C C Y  
 Sbjct 90 LPKIKELMSLADRSVWRCDPWKHEAGVTYEEVTRLLQGYVENEVDLNDGTCRRDCGYK 149

Query 55 APRHNFKEDNRYKFPQRQCTGTIYNCIGEKITEKEPVIRYQIKKPESPEsdKRYYYVELP 114  
 + R+ D+ + Q +C+G +++C V S +RY ++E  
 Sbjct 150 SARNEGCFDSEFCSEQPKCSGGVHDCR-----FVESNMQICQAEKNSRRYEFIE-- 199

Query 115 VNTDKKKYQYAIIEGSNYTYRYVYGNKEHSDHTTVNFDTWIRG-FVRCDICRCLCDESKD 173  
 Y V+GN++ T + +W R FV C C CLCD+ +  
 Sbjct 200 -----YQSGLVHGNQKPC-GTRNSAKSWNRWLFVECSYCLCCLDD-QS 240

Query 174 SESIRSFSLNAVESDTKDNKVVIGVQLALKDKIFYFKIROSPLLPLGKADQRKLSWKSDD 233  
 + S R F+L V +D ++N+VV G++ +IF+ ++++ LLPLG ++ L WK D  
 Sbjct 241 ARSDRYFNLRPVIADVENNRVVTGLRFRVKSRRIFHLQVQEQQLLPLGVINETTQWKPLD 300

Query 234 PSLSSASK-----DIFKLDVNKRSIHIGSATSNLSDFVVTGVKFAEIDGNLALGVKLTKF 288  
 S D L KR++ +G + + VVTG++F + +L L + +  
 Sbjct 301 AYSISDKDVTEHADYHTLSYEKRALDLGDLKA-DNSAVVTGLRFRVGAHLQLEAQFSAL 359

Query 289 DVMSGKLMNDN--NQWIYNLSLQKLN--GGVANRPKFTDNHASEKLDLGLVEFRQSDL 345  
 + SGKL++ +QW S+ + A K + D +EF +  
 Sbjct 360 EFESGKLIDPKRTSQWTSLGASQHQREKLPKDAQVSSKPELSIPYPSDNQYIEFTNTGF 419

Query 346 KDDVGGQSTVPFIDLRISVSTG-TALIGVGLQFRTRDTSGGFIAPVVVTHP--TYT 397  
 +D Q+TVPFID++ +VS L G+G+ ++ + GGF+AP + T+ Y  
 Sbjct 420 VEDAAQTVPFIDIQDQVSEPAVPLSGIGIYYKGLEGYGGFLAPRITTYDFTPYV 474

>  [ref|XP\\_002044470.1](#)  GM11959 [Drosophila sechellia]

[gb|EDW53677.1](#)  GM11959 [Drosophila sechellia]  
 Length=799

[GENE ID: 6620262 Dsec\GM11959](#) | GM11959 gene product from transcript GM11959-RA  
 [Drosophila sechellia] (10 or fewer PubMed links)

Score = 463 bits (1192), Expect = 1e-128, Method: Composition-based stats.  
 Identities = 101/400 (25%), Positives = 166/400 (41%), Gaps = 50/400 (12%)

Query 6 LGFSRTLDNVDPKEHIKGETYEEITRFNQVYFTQEANFG---SCNSKCEDYAAPRHNFK 62  
 L R + DP +H++G TY+E+TR Q Y E + +C C Y + R  
 Sbjct 425 LRADRIYRCDPKTKHVQGVTYDEVTRLLQGYIENEVDLNEETCRETGCFYQSTRSEGCF 484

Query 63 DNRYKFPQRQCTGTIYNCIGEKITEKEFPVIRYQIKKPESPEKRYYYVELPVNTDKKKY 122  
 + Y Q +CTG +YNC V P S +RY ++E  
 Sbjct 485 KDLYCSRQPKCTGRLYNQ-----FVDSDMWVCPSPQNSTRRYEFIE----- 526

Query 123 QYAIIEGSNYTYRYVYGNKEHSDHTTVNFDTWIRGF-VRCDICRCLCDESKDSESIRSF 181  
 Y V G + T D+W R C C CLCDE + +S R F+  
 Sbjct 527 -----YENGRVLGQRGKCTRGTTKVDSWWRVLLWHCSYCFCLCDE-ESLKSDFRN 576

Query 182 LNAVESDTKDNKVVIGVQLALKDKIFYFKIROSPLLPLGKADQRKLSWKSDDPSLSSASK 241  
 + +D K N++V G + + QS +G ++ + D  
 Sbjct 577 MRDTIADIKRNRIVTGGRTSAAWHC-----QSKHSGMGNPVEK---YNVFDRH-VKNGV 626

Query 242 DIFKLDVNKRSIHIGSATSNLSDFVVTGVKFAEIDGNLALGVKLTKFDVMSGKLMND--N 299  
 D KL R+I + + + FVVTGV+F + +L L ++FD ++G+L+ N  
 Sbjct 627 DYHKLSYEYRTIDLDDVDTEDNSFVVTGVRFRVVGTHLNLEAYYSEFDFTGLTIQPEYN 686

Query 300 NQWIYNLSLQKLN--GGVANRPKFTDNHASEKLDLGLVEFRQSDLKDDVGGQSTV 354  
 + W N + ++ A+ + ++F + L D QSTV  
 Sbjct 687 SYWKSNDNTDVSGAREKLRLSNADVSTRTIAPSLPLSRHNQFIDFTNTGLDKDAQSTV 746

Query 355 PFIDLRISIVS-TGTALIGVGLQFRTRDTSGGFIAPVVVTH 393  
 PF+D++ +VS L G+G+ ++ R+ GGF+ P ++T+  
 Sbjct 747 PFMDIQDQVSNPPVPLAGIGIYYKGRNGYGGFLGPKIITY 786

>  [ref|XP\\_001851109.1](#)  conserved hypothetical protein [Culex quinquefasciatus]

[gb|EDS33062.1](#)  conserved hypothetical protein [Culex quinquefasciatus]  
 Length=582

[GENE ID: 6041957 CpipJ\\_CPIJ009482](#) | hypothetical protein  
 [Culex quinquefasciatus]

Score = 462 bits (1190), Expect = 3e-128, Method: Composition-based stats.  
 Identities = 104/405 (25%), Positives = 171/405 (42%), Gaps = 48/405 (11%)

Query 8 FSRTLDNVDP--KEHIKGETYEEITRFNQVYFTQEANFGS---CNSKCEDYA-APRHNFK 61

Sbjct 198 SR DP +H +G+T+ +ITR Q Y E N + C +C Y+ + ASREYWRCDPERNQHKEGKTFVQITRLLQGYVELELNMNTDDTCMEEC SFYSWG VQQEGC 257

Query 62 EDNRYKFPQRQCTGTIYNCIGEKITEKEPVIRYQIKKPESPE SDKRYYYVELPVNTDKKK 121  
 ++Y Q +C+G IY+C E + P + S +RY+++E

Sbjct 258 YKDQYCTMQPKCSGKIYDC-----EFIDSDMWICPAAKTS HRRYHFIE----- 300

Query 122 YQYAIIEGSNYTYRYVYGKNEHS DHTTVNFDTWIRGFVR-CDICRCLCDESKDSEIRSF 180  
 Y V G K++ +W R F C C C+CD++ S R

Sbjct 301 -----YDNGKVLGQKKYCAQGR TKVMSWTRYFFYRCSYCFMCCDA-GKNSDRYI 349

Query 181 SLNAVESDTKDNKVVIGVQLALKDKIF YFKIRQSPLLPLGKADQRKLSWKSDDPS----- 235  
 ++ SD DNKVV G++ K++I + ++Q LLP G D L W

Sbjct 350 NMRESVSDVMDNKVV TGMRF IKKNQI IHLIVQQGRLLPRGHIDNGTLEWVEPHNYTVMSQ 409

Query 236 LSSASKDIFKLDV NKRSIHIGSATS NLSDFVVTGVKFAEIDGNLALGVKLT KFDVMSGKL 295  
 ++ L+ RS+ + +V+TGV+F + +L L ++ T+ + +G+L

Sbjct 410 NVRTGREYHTLNRINRSLDLDDLYV-PQGYVMTGVRFRLLGNHLNLEIRKTEMNFATGQL 468

Query 296 MNDN-NQWIYNSLS-----KQKL NNGGVANRPIKFTDNHASEKLDLGLVEFRQSDLKDDV 349  
 ++ N N WI N + K+ + P+ + ++FR SD D

Sbjct 469 IDSNKNIWIGNDNTERSV DKRTELKLRPHVPLLS PSKSIPDSASNQFIQFRASDRDMA 528

Query 350 GQSTVPFIDLR SIVS-TGTALIGVGLQFRTRDTSGGFIAPVVVTH 393  
 Q+TVPF D + + L G GL + R GGF+A V+T+

Sbjct 529 AQTTPVFFDTQP VAPVRPVPLSGAGLFHKGRPKFGGFVASKVMTY 573

> [ref|XP\\_001648417.1|](#)  hypothetical protein AaeL\_AAEL014309 [Aedes aegypti]  
[gb|EAT33417.1|](#)  conserved hypothetical protein [Aedes aegypti]  
 Length=684

[GENE ID: 5564091 AaeL\\_AAEL014309](#) | hypothetical protein [Aedes aegypti]  
 (10 or fewer PubMed links)

Score = 462 bits (1189), Expect = 3e-128, Method: Composition-based stats.  
 Identities = 112/426 (26%), Positives = 177/426 (41%), Gaps = 69/426 (16%)

Query 8 FSRTL DNVDPK--EHIKGETYEEITRFNQVYFTQEANFGS---CNSKCEDYA-APRHNFK 61  
 SR DP +H +GETY ++TR Q Y E + + C C Y R

Sbjct 264 ASREYWRCDPDHSHKHEGETYVQLTRLLQGYVENEVDMNTDNTCKENCAYYNWGV RQEQC 323

Query 62 EDNRYKFPQRQCTGTIYNCIGEKITEKEPVIRYQIKKPESPE SDKRYYYVELPVNTDKKK 121  
 + Y Q +C G +Y+C E V P + S+++RY ++E

Sbjct 324 YKDLYCSKQPKCAGKMYSC-----EYVSDMWICPAASSSNRRYEFIE----- 366

Query 122 YQYAIIEGSNYTYRYVYGKNEHS DHTTVNFDTWIRG-FVRC DICRCLCDESKDSEIRSF 180  
 Y V G K+H T D+W R F C C CLCD+S +S R

Sbjct 367 -----YENGMVMGQKKHC TRGTTKVDSWWRWLFWHCSYCFCLCDDS-GPKSDRYI 415

Query 181 SLNAVESDTKDNKVVIGVQLALKDKIF YFKIRQSPLLPLGKADQRKLSWKSDDPSL----- 236  
 ++ SD +NKVV G++ K++I + +++ LLP G+ D L W +

Sbjct 416 NMRESVSDVMNNKVV TGLRF IKKNRI IFLIVQEGQLLPRGQIDNTTLQWVEPEAYNILSP 475

Query 237 -SSASKDIFKLDV NKRSIHIGSATS NLSDFVVTGVKFAEIDGNLALGVKLT KFDVMSGKL 295  
 A D ++ R++ + +VVTGV+F + ++ L V++T+ D SGKL

Sbjct 476 YIRAKVDY NVMN YENRAMDLDDIILQP-PYVVTGVRFRMLGTHMNLEVRMTEMDFGSGKL 534

Query 296 MN-DNNQWIYNSLSKQKLN-----NGGVANRPIKFTDNH 328  
 ++ D + W+ + ++ + + PI

Sbjct 535 IDPKS I WGVSDKTEHSEDKRLVPEQLPSEVPFFN SSSISSRTEMKLDKPHIPI LSPTKS 594

Query 329 ASEKLDLGLVEFRQSDLKDDV GQSTVPFIDLR SIVST-GTALIGVGLQFRTRDTSGGFIA 387  
 + ++FR+SD D Q+TVPF D + +V + T L G GL + R GGF+A

Sbjct 595 VPDSEPNQFIKFRESDRGMDAAQTTPVFFDAQP VVPSKQTP LGGAGLFHKGRPKFGGFMA 654

Query 388 P V V V T H 393  
 P V T+

Sbjct 655 P R V F T Y 660



> [ref|XP\\_002015853.1](#) | [G](#) GL10792 [Drosophila persimilis]

[gb|EDW31743.1](#) | [G](#) GL10792 [Drosophila persimilis]

Length=670

GENE ID: 6590462 Dper\GL10792 | GL10792 gene product from transcript GL10792-RA [Drosophila persimilis] (10 or fewer PubMed links)

Score = 462 bits (1188), Expect = 4e-128, Method: Composition-based stats.  
Identities = 112/415 (26%), Positives = 168/415 (40%), Gaps = 49/415 (11%)

```
Query 6 LGFSRTLDNDVP--KEHIKGETYEEITRFNQVYFTQEANFG---SCNSKCEDYAAPRHNH 60
          R DP +H+ GETY+ TR Q Y EAN G C C DY R N
Sbjct 266 ARSGRVYWRCDPGKDKHVSGETYDRATRLQLQGYVENEANLGENQGCWGTCGDYDPDTRSNG 325

Query 61 KED--NRYKFPQRQCTGTIYNCIGEKITEKEPVIRYQIKKPESPEPESDKRYYYVELPVNTD 118
          Q C G +YNC + P S +RY Y++
Sbjct 326 CYKGDKELCGKQTPCNGRLYNCDMDSDVE-----ICPSEGNSRRYEYIQSDDGAT 377

Query 119 KKKYQYAIIEGSNYTYRYVYGNKEHSDHTTVNFDT-WIRGFVRCDICRCLCDESKDSESI 177
          + + + T + W RC C CLCDE + S
Sbjct 378 LGRKS-----SNGRCESATKTASSGWYMLWRCSYCFCLCDE-QGPLSD 420

Query 178 RSFSLNAVESDTKDNKVVIGVQLALKDKIFYFKIRQSPLLPLGKADQRKLSWKSDDP-- 235
          R F+L SD +NKVV GV+ +++F+ +++Q LLP G + L W D
Sbjct 421 RYFNLRLDLSDFMENKVVTVGVRFVKSNRVFLHLQLQOGELLPRGAINVSSLEWLPLDSYHL 480

Query 236 ---LSSASKDIFKLDVNKRSIHIGSATSNLSD-FVVTGKFAEIDGNLALGVKLTDFVDM 291
          D L V+ R++ + TS + VVTG +F +L L V+ + FD
Sbjct 481 NDVDVRNDYDYHTLTVDSRAMDLDEITSGSNRSLVVTGARFRVWHKHLNLEVRFSYFDFP 540

Query 292 SGKLMND--NNQWIYNSLSKQKLNNG-----GVANRPIKFTDNHASEKLDLGLVEFRQS 343
          +G+L+ N+ W+ NS +++ + A+ P + F S
Sbjct 541 TGRLVEPKRNSVWLNNSNTEKTIKPRQELIVKEADVPTAADQPSLPLSTSNQYMNFFSS 600

Query 344 DLKDDVGQSTVPPFIDLRSIVSTG-TALIGVGLQFRTRDTSGGFIAPVVVTHPTYT 397
          D Q+T+PFID++ +V L G+G+ +++R SGGF AP VVT+ Y+
Sbjct 601 SKVKDASQNTLPPFIDVQEVVPHPAVPLAGLGIFYKSRPGSGGFFAPKVVTY-DYS 654
```

> [gb|ACM40903.1](#) | secreted salivary protein [Culicoides nubeculosus]

Length=417

Score = 459 bits (1180), Expect = 4e-127, Method: Composition-based stats.  
Identities = 398/398 (100%), Positives = 398/398 (100%), Gaps = 0/398 (0%)

```
Query 1 NKLPSLGFRTLDNDVPKEHIKGETYEEITRFNQVYFTQEANFGSCNSKCEDYAAPRHNH 60
          NKLPSLGFRTLDNDVPKEHIKGETYEEITRFNQVYFTQEANFGSCNSKCEDYAAPRHNH
Sbjct 20 NKLPSLGFRTLDNDVPKEHIKGETYEEITRFNQVYFTQEANFGSCNSKCEDYAAPRHNH 79

Query 61 KEDNRYKFPQRQCTGTIYNCIGEKITEKEPVIRYQIKKPESPEPESDKRYYYVELPVNTDKK 120
          KEDNRYKFPQRQCTGTIYNCIGEKITEKEPVIRYQIKKPESPEPESDKRYYYVELPVNTDKK
Sbjct 80 KEDNRYKFPQRQCTGTIYNCIGEKITEKEPVIRYQIKKPESPEPESDKRYYYVELPVNTDKK 139

Query 121 KYQYAIIEGSNYTYRYVYGNKEHSDHTTVNFDTWIRGFVRCDICRCLCDESKDSEIRSF 180
          KYQYAIIEGSNYTYRYVYGNKEHSDHTTVNFDTWIRGFVRCDICRCLCDESKDSEIRSF
Sbjct 140 KYQYAIIEGSNYTYRYVYGNKEHSDHTTVNFDTWIRGFVRCDICRCLCDESKDSEIRSF 199

Query 181 SLNAVESDTKDNKVVIGVQLALKDKIFYFKIRQSPLLPLGKADQRKLSWKSDDP--SLSSAS 240
          SLNAVESDTKDNKVVIGVQLALKDKIFYFKIRQSPLLPLGKADQRKLSWKSDDP--SLSSAS
Sbjct 200 SLNAVESDTKDNKVVIGVQLALKDKIFYFKIRQSPLLPLGKADQRKLSWKSDDP--SLSSAS 259

Query 241 KDIFKLDVNKRSIHIGSATSNLSDFFVVTGKFAEIDGNLALGVKLTDFVMSGKLMNDNN 300
          KDIFKLDVNKRSIHIGSATSNLSDFFVVTGKFAEIDGNLALGVKLTDFVMSGKLMNDNN
Sbjct 260 KDIFKLDVNKRSIHIGSATSNLSDFFVVTGKFAEIDGNLALGVKLTDFVMSGKLMNDNN 319

Query 301 QWIYNSLSKQKLNNGGVANRPIKFTDNHASEKLDLGLVEFRQSDLKDDVGQSTVPPFIDL 360
          QWIYNSLSKQKLNNGGVANRPIKFTDNHASEKLDLGLVEFRQSDLKDDVGQSTVPPFIDL
Sbjct 320 QWIYNSLSKQKLNNGGVANRPIKFTDNHASEKLDLGLVEFRQSDLKDDVGQSTVPPFIDL 379

Query 361 SIVSTGTALIGVGLQFRTRDTSGGFIAPVVVTHPTYT 398
          SIVSTGTALIGVGLQFRTRDTSGGFIAPVVVTHPTYT
```

Sbjct 380 SIVSTGTALIGVGLQFRTRDTSGGFIAPVVVTHPTYTG 417

>  [ref|XP\\_001360382.2|](#)  GA15824 [Drosophila pseudoobscura pseudoobscura]  
[gb|EAL24957.2|](#) GA15824 [Drosophila pseudoobscura pseudoobscura]  
Length=670

[GENE ID: 4803708 Dpse\GA15824](#) | GA15824 gene product from transcript GA15824-RA [Drosophila pseudoobscura pseudoobscura] (10 or fewer PubMed links)

Score = 456 bits (1173), Expect = 2e-126, Method: Composition-based stats.  
Identities = 111/415 (26%), Positives = 167/415 (40%), Gaps = 49/415 (11%)

Query 6 LGFSRTLNDVDP--KEHIKGETYEEITRFNQVYFTQEANFG---SCNSKCEDYAAPRHNH 60  
R DP +H+ GETY+ TR Q Y EAN G C C DY R N

Sbjct 266 ARSGRVYWRCDPGKDKHVSGETYDRATRLQLQGYVENEANLGENQGCWGTGCGDYPDTRSNG 325

Query 61 KED--NRYKFPQRQCTGTIYNCIGEKITEKEPVIRYQIKKPESPEKRYYYVELPVNTD 118  
Q C G +YNC + P S +RY Y++

Sbjct 326 CYKGDKELCGKQTPCNGRLYNCGDMSDVE-----ICPSEGNSRRRYEYIQSDDGAT 377

Query 119 KKKYQYAIIEGSNYTYRYVYGNKEHSDHTTVNFDTWIRG-FVRCDICRCLCDESKDSESI 177  
+ + + T + RC C CLCDE + S

Sbjct 378 LGRKS-----SNGRCESATKTASSGCYMLWRCSYCFCLCDE-QGPLSD 420

Query 178 RSFSLNAVESDTKDNKVVIGVQLALKDKIFYFKIRQSPLLPLGKADQRKLSWKSDDP-- 235  
R F+L SD +NKVV GV+ +++F+ +++Q LLP G + L W D

Sbjct 421 RYFNLRDLSDFMENKVVTVGVRFVKSNRVFLQLQGGELLPRGAINVSSLEWLPLDSYHL 480

Query 236 ---LSSASKDIFKLDVNKRSIHIGSATS NLS-DFVVTGVKFAEIDGNLALGVKLT KFDVM 291  
D L V+ R++ + TS + VVTG +F +L L V+ + FD

Sbjct 481 NDVDVRNDYDYHTLTVDSTRAMDLEITSGSNRSLVVTGARFRVWHKHLNLEVRFSYFDFP 540

Query 292 SGKLMND--NNQWIYNSLSKQKLNNG-----GVANRPIKFTDNHASEKLDLGLVEFRQS 343  
+G+L+ N+ W+ NS +++ + A+ P + F S

Sbjct 541 TGRLVEPKRNSVWLNSNTEKTIKPRQELIVKEADVPTAADQPSLPLSTSNQYMNFFSS 600

Query 344 DLKDDVGGQSTVPFIDLR SIVSTG-TALIGVGLQFRTRDTSGGFIAPVVVTHPTYT 397  
D Q+T+PFID++ +V L G+G+ +++R SGGF AP VVT+ Y+

Sbjct 601 SKVKDASQNTLPFIDVQEVVPHPAVPLAGLGIFYKSRPGSGGFFAPKVVTY-DYS 654

>  [ref|XP\\_002092594.1|](#)  GE14278 [Drosophila yakuba]  
[gb|EDW92306.1|](#)  GE14278 [Drosophila yakuba]  
Length=678

[GENE ID: 6531807 Dyak\GE14278](#) | GE14278 gene product from transcript GE14278-RA [Drosophila yakuba] (10 or fewer PubMed links)

Score = 451 bits (1160), Expect = 7e-125, Method: Composition-based stats.  
Identities = 107/406 (26%), Positives = 165/406 (40%), Gaps = 50/406 (12%)

Query 8 FSRTLNDVDP--KEHIKGETYEEITRFNQVYFTQEANFG---SCNSKCEDYAAPRHNHFK 62  
SR DP EH++G+TY+ +TR Q + E N SC S C DY R +

Sbjct 272 SSRLYWRCDPGKNEHVEGQTYDRVTRLLQGFVENEINLNPNQSCRSSCPDYHDTSSGCV 331

Query 63 --DNRYKFPQRQCTGTIYNCIGEKITEKEPVIRYQIKKPESPEKRYYYVELPVNTDKK 120  
+ + Q C G +YNC + + S +RY Y+ +

Sbjct 332 QPEEEFCGQPPACKGRLYNCNTIESDIS-----VCLSPNATSARRYEYITFHEDETSP 384

Query 121 KYQYAIIEGSNYTYRYVYGNKEHSDHTTVNFDTWIRG-FVRCDICRCLCDESKDSE SIRS 179  
T +W F RC C CLCDE S R

Sbjct 385 V-----CKSTVRKPSWSSWIFWRCHYCFCLCDEP-GPNSDRF 421

Query 180 FSLNAVESDTKDNKVVIGVQLALKDKIFYFKIRQSPLLPLGKADQRKLSWKSDDP-- 236  
F+L SD K NKVV GV+ ++F+ +++Q LLP G L W +

Sbjct 422 FNLRDMSDFKQNKVVTVGVRFVFKIKRVFHLQLQGGELLPGGVIKNSLEWLVEAYNVSD 481

Query 237 --SSASKDIFKLDVNKRSIHIGSATS NLSDFVVTGVKFAEIDGNLALGVKLT KFDVMSGK 294  
D L V+ R++ + + N +D VVTG +F +L L V+ T F+ +G+

Sbjct 482 VDIRDGYDYHTLSVDSRAMDLDEISVNTTDQVVTGFRFRVFKHLNLEVRFTSFNFSTGQ 541

Query 295 LMND--NNQWIYNSLS----KQKLNNGGVANRPIKFTDNHASEKLDLGLVEFRQSDLKDD 348  
L+ + W+ N S ++K ++ P D ++F S D  
Sbjct 542 LIEPQTKSFWLGNQNSHLEGERKRLILKESDLPTASELPSLPLSQDNQYMDVSSSSQLKD 601

Query 349 VGQSTVPFIDLRSIVSTGT-ALIGVGLQFRTRDTSGGFIAPVVVTH 393  
Q+T P++D++ +V L G+G+ ++ R GGF AP VVT+  
Sbjct 602 AAQNTFPYVDVQEVVPPQAGPLAGLGIYYKGRPGYGGFFAPKVVTY 647

>  [ref|XP\\_002427759.1|](#)  conserved hypothetical protein [Pediculus humanus corporis]  
[gb|EEB15021.1|](#)  conserved hypothetical protein [Pediculus humanus corporis]  
Length=635

[GENE ID: 8231845 Phum\\_PHUM343650](#) | hypothetical protein  
[Pediculus humanus corporis]

Score = 447 bits (1149), Expect = 1e-123, Method: Composition-based stats.  
Identities = 115/405 (28%), Positives = 183/405 (45%), Gaps = 49/405 (12%)

Query 6 LGFSRTLDNVPKEHIKGETYEEITRFNQVYFTQEANFG---SCNSKCEDYAAPRHNFK 62  
+ R+L DPK+H++G TY ++T+ Q Y E N SC+ C Y +N  
Sbjct 254 MNADRSLYKCDPKQHVEGVTVYVKLTKLLQGYIENEVNLNGGGSCSENCGYEYETEYNGCY 313

Query 63 DNRYKFPQRQCTGTIYNCIGEKITEKEPVIRYQIKKPESPEKRYYYVELPVNTDKKKY 122  
N++ Q C G + NC V S S++RY ++E  
Sbjct 314 HNQFCSHQPPCRGKVLNCK-----FVDSDMTICRSS-NSERRYDWIE----- 354

Query 123 QYAIIEGSNYTYRYVYGNKEHSDHTTV-NFDTWIRG-FVRCDICRCLCDESKDSESIRSF 180  
Y GN ++ + D+W R F C C CLCD+ +D S R F  
Sbjct 355 -----YENGNLGNPGVCENRNLFKVDSSWRYLFWHCSYCLCLCDDPED--SDRYF 403

Query 181 SLNAVESDTKDNKVVIGVQLALKDKIFYFKIRQSPLPLGKADQRKLSWKSDDDPS----- 235  
+L V SD + NKVV G++L ++I + +I+Q L P G + LSWK D  
Sbjct 404 NLRDVTSDVEKNKVVGTGIRLVKHNRIIHIQIQGSLNPRGIINNGTLSWKPVVDNYTIDDL 463

Query 236 LSSASKDIFKLDVKNRSIHIGSATSNSLDFVVTGVKFAEIDGNLALGVKLTKFDVMSGKL 295  
+ D + +R+I + VTGV+F ++ +L L +++T F+ +G++  
Sbjct 464 NVENNVDYHTMTWAERTIDMDDVFGPSE-HAVTGVFRKLGSHLNLLEIRVTPFNFTTGQV 522

Query 296 -MNDNNQWIYNSLSK-----QKLNNGGVANRPIKFTDNHASEKLDLGLVEFRQSDLKDD 348  
D + W+ N + + + PI+ H + ++F+ SD D  
Sbjct 523 SSTDKSYWLANDNTDGNLKNPRTEIRLNNPDIPR-KGPHTLDSKHDQYLQFKNSDFNTD 581

Query 349 VGQSTVPFIDLRSIVSTGTALIGVGLQFRTRDTSGGFIAPVVVTH 393  
GQ+T+P+ID +++ S G L G+GL R R SGGFIAP +VT+  
Sbjct 582 AGQNTIPYIDSQALTSHGFPPLSGLGLIHRGRKNSGGFIAPKLVTY 626

>  [ref|XP\\_001946173.1|](#)  PREDICTED: similar to GA15301-PA [Acyrtosiphon pisum]  
Length=677

[GENE ID: 100162921 LOC100162921](#) | similar to GA15301-PA [Acyrtosiphon pisum]

Score = 443 bits (1140), Expect = 2e-122, Method: Composition-based stats.  
Identities = 104/409 (25%), Positives = 166/409 (40%), Gaps = 49/409 (11%)

Query 6 LGFSRTLDNVPKEHIKGETYEEITRFNQVYFTQEANFG---SCNSKCEDYAAPRHNFK 62  
+ S DP +H+K TY E+T+ Q Y EA+ SC C Y H  
Sbjct 283 ISASNIYWRCDPAKHVKDTTYSEVTQLLQGYIENEADMNREQSCMKDCSYEVAEHKSCF 342

Query 63 DNRYKFPQRQCTGTIYNCIGEKITEKEPVIRYQIKKPESPEKRYYYVELPVNTDKKKY 122  
++ QR C G + NC + S +RY Y+  
Sbjct 343 RDQLCAKQRVCNGLLNLCQ-----YIDSDMRICQSKFGSSRRYDI----- 383

Query 123 QYAIIEGSNYTYRYVYGNKE-HSDHTTVNFDTWIRGF-VRCDICRCLCDESKDSESIRSF 180  
Y V G+ TT D+W C C C+CD S DS S R F  
Sbjct 384 -----AYEKGKVLGDSSVECKGTTSMVDSWWTFLVWHCSYCFICD-SNDSGSDRYF 434

Query 181 SLNAVESDTKDNKVVIGVQLALKDKIFYFKIRQSPLPLGKADQRKLSWKSD-----D 233  
SL S+ K+N V+ GV+ ++F+ + ++ L P G + W

Sbjct 435 SLKPVSNIKNNMVTGVRFIKVKQMFHLQAQEGELGPRGGISESSRQWLEVPGSEFSYK 494

Query 234 PSLSSASKDIFKLDVNRKRSIHIGSATSNLSDFFVVTGVKFAEIDGNLALGVKLTDFVMSG 293  
D L R I I + + + VVTG+KF +I +L + V++T FD M+G

Sbjct 495 NKTLDKGDVYHTLTYSERIIDIDNVIA-PENTVVTGLKFRKIGSHLNIEVRITPFDFTG 553

Query 294 KLMND--NNQWIYNSLSK-----QKLNNGGVANRPIKFTDNHASEKLDLGLVEFRQSDLK 346  
+L+ + WI N ++ + + ++ P K + + ++F S +

Sbjct 554 ELIEPELKSYWIGNENTELSINPRTEIDINNSDLPTKSSTASEPDMSSNKFLKFTHSSID 613

Query 347 DDVGQSTVFPIDLRSIVS-TGTALIGVGLQFRTRDTSGGFIAPVVVTHP 394  
DV Q+T+PFID++++ G L G+G+ ++ + GGFI V T+

Sbjct 614 RDVAQTTLFPIDMQTVAPFPVPLSGIGIYYKGTCSFGGFIGANVFTYN 662

>  [ref|XP\\_001121007.1](ref|XP_001121007.1)  PREDICTED: similar to lethal (1) G0193 CG2206-PB, isoform B [Apis mellifera]  
Length=827

<GENE ID: 725122 LOC725122> | similar to lethal (1) G0193 CG2206-PB, isoform B [Apis mellifera] (10 or fewer PubMed links)

Score = 439 bits (1130), Expect = 2e-121, Method: Composition-based stats.  
Identities = 107/398 (26%), Positives = 169/398 (42%), Gaps = 41/398 (10%)

Query 8 FSRTLNDVDPKEHIKGETYEEITRFNQVYFTQEANFG---SCNSKCEDYAAPRHNFKEDN 64  
R + D + H ETY ++T+ Q Y E + SC C Y + N

Sbjct 432 APRQIWKCDARIHKLDETYTKLTQLFQGYIVNEVDLNKDSRENCAYEYSKVYGCYKN 491

Query 65 RYKFPQRQCTGTIYNCIGEKITEKEPVIRYQIKKPESPEQKRYYYVELPVNTDKKKYQY 124  
++ QR+C G I C E + P S +D+RY Y+E

Sbjct 492 QFCAQQRKCNRILKC-----EYIDSDMWICPSEHNDRRYEYIE----- 531

Query 125 AIIEGSNYTYRYVYGNKEHSDHTTVNFDTWIRG-FVRCDCRCLCDESKDSESIRSFSLN 183  
Y V+G K + T D+W R F C C C CD+ + S R FSL

Sbjct 532 -----YENGQVFGKSTCNKGTTKVDSWWRWLFWHCSYCFYCDD-NMNSDRYFSLR 583

Query 184 AVESDTKDNKVIGVQLALKDKIFYFKIRQSPLLPLGKADQRKLSWKSDDPS-----LSS 238  
V SD +NKVV GV+ ++I + +I+Q L+P G D+ + WKS +

Sbjct 584 KVVSDVANNKVVTGVRFKVNVQIIHIQIQQEGELMPRGNIDKASVHWKSIEEFNVLDSENIK 643

Query 239 ASKDIFKLDVNRKRSIHIGSATSNLSDFFVVTGVKFAEIDGNLALGVKLTDFVMSGKLMND 298  
D L KR + +++++TG KF + L L V++T F+ +GKL+

Sbjct 644 NGIDYHTLSWEKRGD-LDDLILDKNYLLTGFKFRMVGSRNLNLEVRMTPFNFTTGKLIEP 702

Query 299 --NNQWIYNSLSKQKLNNGGVANRPIKFTDNHASEKLDLGLVEFRQSDLKDDVGQSTVFP 356  
N+ W + + + NP + + + F SD K D Q+T+PF

Sbjct 703 LNNSFWFSDRTRTELKLEPNIPTRPLLLALPDSKTEQYLNFAFSDRKTDAANTIPF 762

Query 357 IDLRSIVS-TGTALIGVGLQFRTRDTSGGFIAPVVVTH 393  
+D++S+ S + G G+ + R SGG++A ++T+

Sbjct 763 LDVQSVESNPPPIAGAGIFHKGRGLSGGYVALRLITY 800

>  [ref|XP\\_002049066.1](ref|XP_002049066.1)  GJ21381 [Drosophila virilis]  
<gb|EDW60259.1>  GJ21381 [Drosophila virilis]  
Length=647

<GENE ID: 6625370 Dvir\GJ21381> | GJ21381 gene product from transcript GJ21381-RA [Drosophila virilis] (10 or fewer PubMed links)

Score = 437 bits (1125), Expect = 9e-121, Method: Composition-based stats.  
Identities = 113/400 (28%), Positives = 172/400 (43%), Gaps = 37/400 (9%)

Query 10 RTLNDVDPK--EHIKGETYEEITRFNQVYFTQEANFG---SCNSKCEDYAAPRHNFKEDN 64  
R DP+ EH+ G+TY+EITR Q Y E N SC CEDY R + N

Sbjct 260 RIYWRCDPRPREHVLGKTYDEITRLMQGYVENEINLNTSSCYQSCEDYQDVRVTGCQKN 319

Query 65 RYKFPQRQCTGTIYNCIGEKITEKEPVIRYQIKKPESPEQKRYYYVELPVNTDKKKYQY 124  
+ Q +C G +++C + S +RY ++ + +

Sbjct 320 EFCNDQPKCAGRVHSCR-----FIDSNMDCVQSYGNSSRRYEFIHYDNDRLNIDED 371

Query 125 AIIEGSNYTRYVYGNKEHSDHTTVNFDTWI-RGFVRCDCICRCLCDESKDSEIRSFSLN 183  
 I + +W F RC C CLCDE +S R FSL  
 Sbjct 372 GIQNLV-----CSRGSNRVKSWSFYLFWRCHYCFCLCDEP-GPQSDRFFSLR 417

Query 184 AVESDTKDNKVIGVQLALKDKIFYFKIRQSPLLPLGKADQRKLSWKSDDPS-----LSS 238  
 SD K NK+V G + +IF+ +++Q LLP G +Q L W +  
 Sbjct 418 DTLSDFKQNKIVTGARFIKQRIHLQLQQGELLPGGLINQSSLDWIPLESFDVNHVDIR 477

Query 239 ASKDIFKLDVNRKSIHIGSATSNSLSDVVTGVKFAEIDGNLALGVKLTDFVMSGKLMND 298  
 D +L RS+ + T+ VVTG +F ID +L L V+ + F+ +G+L+N  
 Sbjct 478 NGFDYHELTFFESRSLGLDEITAKNDSLVTGARFRVIDKHLNLAVRFSLFNFTTGRLLNP 537

Query 299 --NNQWIYNSLSKQKLN-NGGVANRPKFTDNHASEKLDLGLVEFRQSDLKDDVQGSTVP 355  
 N+ W+ N+ K + N+P K T + +EF S + D QSTVP  
 Sbjct 538 EVNSLWLGNNADKPRQKLLLKNPNKPTKTTVKSVPKSKNNQFMFIFSSMDMDAAQSTVP 597

Query 356 FIDLRISIVSTG-TALIGVGLQFRTRDTSGGFIAPVVVTHP 394  
 FID++ +V+ ++ G+G+ + + GGF AP +VT  
 Sbjct 598 FIDVQDVVTPAMSISGLGIYHKGKGGFFGFFAPKIVTFN 637

>  [ref|XP\\_002062683.1|](#)  GK19560 [Drosophila willistoni]  
[gb|EDW73669.1|](#)  GK19560 [Drosophila willistoni]  
 Length=672

[GENE ID: 6639766 Dwil\GK19560](#) | GK19560 gene product from transcript GK19560-RA [Drosophila willistoni] (10 or fewer PubMed links)

Score = 429 bits (1104), Expect = 2e-118, Method: Composition-based stats.  
 Identities = 104/409 (25%), Positives = 167/409 (40%), Gaps = 43/409 (10%)

Query 8 FSRTLNDVDPKE-HIKGETYEEITRFNQVYFTQEANFG---SCNSKCEDYAAPRHNFK- 62  
 R DP +I G+TY+EITR Q Y E N C S C +Y +  
 Sbjct 273 SQRVYWRCDPDGGYILGKTYDEITRLLQGYLENEVNLNENQQCWSTCANNYYETQQFGCYQ 332

Query 63 -DNRYKFPQRQCTGTIYNCIGEKITEKEPVIRYQIKKPESPEKRYYYVELPVNTDKKK 121  
 + Y Q++C G +YNC + P + S RY ++E T K  
 Sbjct 333 PEEYCGKQKCKNGKLYNCR-----YIDSDMWVCPAENSTHRYKHIEFESGTILGK 384

Query 122 YQYAIIEGSNYTRYVYGNKEHSDHTTVNFDTWIRGF-VRCDCICRCLCDESKDSEIRSF 180  
 + N E ++W R C C CLCDE K +S R F  
 Sbjct 385 I-----FPQPPNPEQCQTEMEKVESWRYLLWHCSYCFCLCDE-KGPQSDRFF 432

Query 181 SLNAVESDTKDNKVIGVQLALKDKIFYFKIRQSPLLPLGKADQRKLSWKSDDPS----- 235  
 +L +D ++ +V G++ ++F+ +++Q LLP G + L W D  
 Sbjct 433 NLRDTITDYQNGRVATGIRFVKSQRVFLQLQQGQLLPNGAINGSSLEWLPIDSYDPDNV 492

Query 236 LSSASKDIFKLDVNRKSIHIGSATSNSL--DFVVTGVKFAEIDGNLALGVKLTDFVMSG 293  
 D L + R++ + S D VVTGV+ + +L L V+ ++++ +G  
 Sbjct 493 DVRNGIDYHILSFDSRTLDELVEVSESHSSDHVVTGVRLRMLGKHLNLEVRFSEYNFTTG 552

Query 294 KLMN--DNNQWIYNSLSKQKLN-----GGVANRPKFTDNHASEKLDLGLVEFRQSDL 345  
 +L++ + + W+ N + + PI ++F S  
 Sbjct 553 RLLDAKNKSFWLSNDNTDVSQTKRRQRLWLNPDLPINSKLSLPLSSTNQFMDFFASSP 612

Query 346 KDDVQGSTVPFIDLRISIVSTG-TALIGVGLQFRTRDTSGGFIAPVVVTH 393  
 + D QSTVPFID++ +V L G+GL + R+ GGF AP V+T+  
 Sbjct 613 ESDASQSTVPFIDIQDVVVPVPLTGLGLYHKGREGFGGFFAPKVITY 661

>  [ref|XP\\_001603409.1|](#)  PREDICTED: similar to CG2206-PA [Nasonia vitripennis]  
 Length=675

[GENE ID: 100119678 LOC100119678](#) | similar to CG2206-PA [Nasonia vitripennis]

Score = 412 bits (1059), Expect = 3e-113, Method: Composition-based stats.  
 Identities = 102/407 (25%), Positives = 179/407 (43%), Gaps = 45/407 (11%)

Query 6 LGFSRTLNDVDPKEHIKGETYEEITRFNQVYFTQEANFGSCN-----SKCEDYAAPRHN 59  
 L R + DP +H++G TY ++ Q Y T E + G +KC D + R +

Sbjct 283 LAAPRDYWSCDPDDHVEGLTYAKLDPVFQAYVTSEKDVGISKYFEPFTNKCADSCSDRSD 342

Query 60 FKEDNR--YKFP--QRQCTGTIYNCIGEKITEKEPVIRYQIKKPESPESDKRYYYVELPV 115  
 F + R Y F Q++C G ++NC + + S +R+ ++EL

Sbjct 343 FHDICRSAYCFKHNQKRCYKGLHNCKSSGKSLRM-----CLSDKNSTRRFEFIELTG 394

Query 116 NTDKKKYQYAIIEGSNYTYRYVYGNKEHS-DHTTVNFDTWIRGFVRCDICRCLCDESKDS 174  
 + G+K+ +T V C+ C C+CD+ ++

Sbjct 395 KKTE-----FLGSKKSCGSNTQVKVSQTTLLETCEYCFICDD-TNN 436

Query 175 ESIRSFSLNAVESDTKDNKVIGVQLALKDKIFYFKIRQSPLLPLGKADQRKLSWKSDDP 234  
 E R FSL V SD N VV GV+ A ++ IF+ +I+Q L+ G + WK +

Sbjct 437 EMDRYFSLRNVNSVDKNMVTGVRFAKENHIFHIQIQQKLVENGNIKASTVEWKPVEN 496

Query 235 SLSSA-----SKDIFKLDVNKRSIHIGSATSNSLDFVVTGVKFAEIDGNLALGVKLTKFD 289  
 ++D + R +++ + S L V+TG++F +G+L L +++T F+

Sbjct 497 FTIHDDSVVLNRDYHNITWANRLVYLDTFDSPLH-HVLTGLRFQLQNGDLKLEIQVTPFN 555

Query 290 VMGKLMNDNNQWIYNSLSKQKLNNGGVANRPIKFTDNH-ASEKLDLGLVEFRQSDLKDD 348  
 + +L + + W+ NS+ + N + + + + ++F S +K D

Sbjct 556 FYTAEKLTNESTWMSNSIGAYGRGELDLENLDLGTNGHSNLLDSENQYIKFTTSSMKTD 615

Query 349 VGQSTVPFIDLRSIV-STGTALIGVGLQFRTRDTSGGFIAPVVVTHP 394  
 VGQ+ VPF+DL+ + S L G GL R S GF++ V+T+

Sbjct 616 VGQTVVPFMDLQDVTSSPPVPLSGAGLVHRGDKASAGFLSFKVLTYN 662

>  [ref|XP\\_001603438.1](#)  PREDICTED: similar to GA15301-PA [Nasonia vitripennis]  
 Length=669

[GENE ID: 100119712 LOC100119712](#) | venom protein E [Nasonia vitripennis]

Score = 405 bits (1042), Expect = 4e-111, Method: Composition-based stats.  
 Identities = 111/404 (27%), Positives = 176/404 (43%), Gaps = 44/404 (10%)

Query 8 FSRTLNDVDPKEHIKGETYEEITRFNQVYFTQEAN-----FGSCNSKCEDYAAPRHNFK 61  
 R + + DP EH + ETY ++ Q Y +E + +KC D R +

Sbjct 285 APRDVWSCDPPEHKEDETYTKLAPIFQTYIMKENDAGISSYLNKYTNKCSDTCTERTDTY 344

Query 62 EDNRYKFPQ--RQCTGTIYNCIGEKITEKEPVIRYQIKKPESPESDKRYYYVELPVNTD 118  
 + R K+ Q R+C+G +++C K S KRY + L

Sbjct 345 DLCRTKYCQQHGRKCSGRVHDCSSSAELK-----ICEADKNSTKRYNSITLTGKQA 396

Query 119 KKKYQYAIIEGSNYTYRYVYGNKEHS-DHTT-VNFDTWIRGFVRCDICRCLCDESKDSESI 177  
 + V G+ T +N I RC+ C C+CD+S ++E

Sbjct 397 E-----VLGSIVPCARNTAINLREKIHYYRCEYCFICDDS-NTEID 438

Query 178 RSFSLNAVESDTKDNKVIGVQLALKDKIFYFKIRQSPLLPLGKADQRKLSWKSDDPSLS 237  
 R FSL V SD N VV G++ A K+ I + +I Q LL G ++ WK+ D

Sbjct 439 RYFSLRNVTSANKNYVVTGIRFAKNNIIHIQIEQQQLKNGVNESTAHWKAVDNFTI 498

Query 238 SA-----SKDIFKLDVNKRSIHIGSATSNSLDFVVTGVKFAEIDGNLALGVKLTKFDVMS 292  
 +D + ++RS+ + + S L++ V+TG++F +DG+L L +++T D

Sbjct 499 YDKMILIDRDYHNITWQSRVLDLTVDSPLNN-VITGLRFQNVVDGHLKLEIQVTPIDFYR 557

Query 293 GKLMNDNNQWIYNSLSKQKLNNGGVANRPIKFTDNH-ASEKLDLGLVEFRQSDLKDDVGQ 351  
 G+L D + WI NS S V N + + + ++F S +K DVGQ

Sbjct 558 GELKIDESTWISNSKSVHGRIELNVENLDLGTSTYVNLPSSTNQFLKFTTSSMKTDVGQ 617

Query 352 STVPFIDLRSIV-STGTALIGVGLQFRTRDTSGGFIAPVVVTHP 394  
 + VPFIDL+ + S L G GL R S GF++ +T+

Sbjct 618 TVVPFIDLQDVTSSPPVLLSGAGLIHRGDKQSAGFLSFKAITYN 661

>  [gb|EFA08551.1](#) hypothetical protein TcasGA2\_TC006206 [Tribolium castaneum]  
 Length=447

Score = 397 bits (1019), Expect = 2e-108, Method: Composition-based stats.  
 Identities = 103/405 (25%), Positives = 168/405 (41%), Gaps = 48/405 (11%)

Query 8 FSRTLNDVDPKEHIKGETYEEITRFNQVYFTQEANF---GSCNSKCEDYAAP-RHNFKED 63  
 SR + DP++HI+ ET+ EIT F + +AN G C +C +Y + E



Sbjct 66 ASREVWRCDPRKHIRENETFVEITNFLHGFILNKANLDSRGQCRDECSEYKMLPKPKNCEK 125

Query 64 NRYKFPQRQCTGTIYNCIGEKITEKEPVIRYQIKKPESPEKRYYYVELPVNTDKKKYQ 123  
 N + Q C I +C + V + + +RY YV+ +

Sbjct 126 NYWCKKQTTCP-KIIDCQ--YVDSSMTVCSNIM-----AKHNRRYDYVQFADGKN----- 172

Query 124 YAIIEGSNYTYRYVYGNKEHSDHTTVNFDTWIRGF-VRCDICRCLCDESKDSESIRSFSL 182  
 +G K+ + + +T+ C C CLCDE S R +L

Sbjct 173 -----FGAKKSCNGSDYLETYKFWLIWSCSYCFCLCDEGPKYFSDRYINL 218

Query 183 NAVESDTKDNKVVIGVQLALKDKIFYFKIRQSPLLPLGKADQRKLSWKSDDPS-----LS 237  
 S+ DNKVV G++ ++I + ++++ LL G D + W +

Sbjct 219 RLAMSNISDNKVVVTGLRFVKHNQIIHLQVQEGKLEHGTIDPDSVQWVPPENYKRTDRKI 278

Query 238 SASKDIFKLDVNRKRSIHIGSATSNLSDFFVVTGVKFAEIDGNLALGVKLTKFDVMSGKLMN 297  
 +D + KRSI + + + VVTGV+F +I L L + +T F+ +GKL N

Sbjct 279 HEGQDYQVITWEKRSIELTEIMA-RNGSVVTGVRFKKIGSRLELEIMITPFNFTTGKLRN 337

Query 298 --DNNQWIYNSLSKQKLN-----GGVANRPIKFTDNHASEKLDLGLVEFRQSDLKDDV 349  
 D + + + + P + T + +EF +D+ D

Sbjct 338 YSDQSSIFVEAPNIHLRHRFGKKITLSSPDVPTSTAPS-THYTTGKYIEFTTTDVKDA 396

Query 350 GQSTVPFIDLRSI-VSTGTALIGVGLQFRTRDTSGGFIAPVVVTH 393  
 Q+TVPF D + + L GVGL R+R SGGFIAP + T+

Sbjct 397 AQTTPVFFDSQQVYNKNPVPLSGVGLFHRSSRGSGGFIAPKIFTY 441

>  [ref|XP\\_969565.1](#)  PREDICTED: similar to lethal (1) G0193 CG2206-PA [*Tribolium castaneum*]  
 Length=396

[GENE ID: 658059 LOC658059](#) | similar to CG2206-PA, isoform A  
 [*Tribolium castaneum*]

Score = 392 bits (1007), Expect = 4e-107, Method: Composition-based stats.  
 Identities = 106/401 (26%), Positives = 171/401 (42%), Gaps = 43/401 (10%)

Query 7 GFSRTLNDVDPKEHIKGETYEEITRFNQVYFTQEANF---GSCNSKCEDYAAPR-HNFKE 62  
 SR L DP +H++ +TY I F +A+ G C ++C+ Y +

Sbjct 3 RASRELWKCDDPKHVENQTYLRIGNFLHACIFNKAHLDPGKQCNECDAYKMTKPQENCR 62

Query 63 DNRYKFPQRQCTGTIYNCIGEKITEKEPVIRYQIKKPESPEKRYYYVELPVNTDKKKY 122  
 +N++ Q I NC + V + + ++++RY YVEL

Sbjct 63 ENKWCNKQLP-ASRIINCQ--YLDSSMTVCSNK-----NTRKNNRRYQYVELG----- 107

Query 123 QYAIIEGSNYTYRYVYGNKEHSDHTTVNFDTWIRGF-VRCDICRCLCDESKDSESIRSFS 181  
 V G K+ + T+I RC C CLCDE + + +

Sbjct 108 -----NGKVLGKKQSCRGYKTDLSTYIYWIWVWRCVCFCLCDE-QSRGTDVYIN 155

Query 182 LNAVESDTKDNKVVIGVQLALKDKIFYFKIRQSPLLPLGKADQRKLSWKSDDPSLSSA-- 239  
 L ++ DN+VV G++ ++IF+ +I++ LL GK D + W D

Sbjct 156 LRLSLANMNDNRVVTGLRFVKHNEIFHLQIQEGKLLKRGKIDPDSVRWVVDNYKHFDTI 215

Query 240 -SKDIFKLDVNRKRSIHIGSATSNLSDFFVVTGVKFAEIDGNLALGVKLTKFDVMSGKLMND 298  
 KD K+ KRS + + + + VVTGV+F I +L L V T F+ +GKL+

Sbjct 216 EGKDFHKITWEKRSFELSTIMAQ-NGSVVTGVRFRLLRNSLDLEVLTPFNFTTGKLLPS 274

Query 299 NNQWIYNSL-----SKQKLNNGGVANRPIKFTDNHASEKLDLGLVEFRQSDLKDDVGQST 353  
 + + ++ + P T+ H + +EFR +DL D+ Q+T

Sbjct 275 LSTFKGTRNLNLRHKFKQVVKLSKPDVPTGSTEPH-TLITGQYIEFRNTDLYKDLAQT 333

Query 354 VPFIDLRSIVS-TGTALIGVGLQFRTRDTSGGFIAPVVVTH 393  
 VPF D + + S L GV L + R+ SGGFIAP + T+

Sbjct 334 VPFDSQPVNSKNPVPLSGVSLIHKREGSGGFIAPKIFTY 374

>  [ref|XP\\_310721.4](#)  AGAP000385-PA [*Anopheles gambiae* str. PEST]  
[gb|EAA06714.4](#)  AGAP000385-PA [*Anopheles gambiae* str. PEST]  
 Length=667

[GENE ID: 1271866 AgaP\\_AGAP000385](#) | AGAP000385-PA [*Anopheles gambiae* str. PEST]  
 (10 or fewer PubMed links)

Score = 389 bits (1000), Expect = 2e-106, Method: Composition-based stats.  
Identities = 85/421 (20%), Positives = 150/421 (35%), Gaps = 74/421 (17%)

Query 9 SRTLNDVDPKE--HIKGETYEEITRFNQVYFTQEANF---GSCNSKCEDYAAP-RHNFKE 62  
S DP H + TY + TR Q Y E + +C C Y +  
Sbjct 254 SGEYWRCDPDRGAHRENVTVYVQFTRLVQGYVENEVDMTTDNTCRETCSHYKYGHEQHQC Y 313

Query 63 DNRYKFPQRQCTGTIYNCIGEKITEKEPEVIRYQIKKPESPESDKRYYYVELPVNTDKKKY 122  
Y Q +C G IY+C E + P +P +RY Y+E  
Sbjct 314 KELYCSQQPKCAGRIYDC-----EYIDSDMWICPAAPGGTRRYEYIE----- 355

Query 123 QYAIIEGSNYTYRYVYGNKEHS DHTTVNFDTWIRGFVRC DIC--RCLCDESKDSESIRSF 180  
Y + G K+ T D+ C C R + ++ + +  
Sbjct 356 -----YENGENRGRKQSCPRGTTKVDS-----CVFCVFRAVFEQLTNGT----Y 395

Query 181 SLNAVESDTKDNKVVIGVQLALKDKIFYFKIRQSPLLPLGKADQRKLSWKSDDPSL---- 236  
+ + + S VV G++ + ++ + ++Q LLP G+ L W P  
Sbjct 396 TKSHICSSASLRSVVTGLRFVKKRQMVHLIVQQGLLLPGGEIANSTLEWVVPKPFTHTDK 455

Query 237 -SSASKDIFKLDVNRKSIHIGSATS NLSDVFVTVGVKFAEIDGNLALGVKLT KFDVMSGKL 295  
D L ++R+I + +VVTGV+F + L L +++T+ + +GKL  
Sbjct 456 GVRDGHYHTLSYDRRAIDLDDVHVPP-GYVVTGVQFRVLGARLNL LLLRMTEMNFTAGKL 514

Query 296 MN-DNNQWIYNSLSK-----QKLNNGGVANRPIKFTDNHASEKLD 334  
+ D + W + ++ + + P  
Sbjct 515 VGLDASIWSGSLETERAHLCKVQFITFHALSLSPSRTEIPLKYMDVPTLAPAKSVPMSTQ 574

Query 335 LGLVEFRQSDLKDDVQSTVPFIDLRISIVS-TGTALIGVGLQFRTRDTSGGFIAPVVVTH 393  
+ F + + D Q+T+PF+D + + T L G GL ++ GGF+AP ++T+  
Sbjct 575 NQYLRFGPTGGRADAAQT T I PFLDAQVSPVVRPTPLAGAGLMYKGVPKYGGFVAPKIMTY 634

Query 394 P 394  
Sbjct 635 N 635

>  [ref|XP\\_001603377.1](#)  PREDICTED: similar to CG2206-PA [Nasonia vitripennis]  
Length=671

[GENE ID: 100119643 LOC100119643](#) | similar to CG2206-PA [Nasonia vitripennis]

Score = 385 bits (990), Expect = 3e-105, Method: Composition-based stats.  
Identities = 103/408 (25%), Positives = 183/408 (44%), Gaps = 46/408 (11%)

Query 6 LGFSRTLNDVDPKEHIKGETYEEITRFNQVYFTQEANF-----GSCNSKCEDYAAP 56  
+ R DP EH +G TY +++ Q Y E + C C+D+  
Sbjct 284 IKAPRDFWYCDPDEHAEGSTYTKLSPIFQAYIMNEKDSGLTFHHKKRNKCKGSKDHNET 343

Query 57 RHNFKEDNRYKFPQRQCTGTIYNCIGEKITEKEPEVIRYQIKKPESPESDKRYYYVELPVN 116  
++ + +++C+G + +C + ES +RY ++E+ +  
Sbjct 344 -NDLCRSKHCRNYEKKCSGLVRDCTSSAEELN-----ICYANEESSRRYEFIEILSS 394

Query 117 TDKKKYQYAIIEGSNYTYRYVYGNKEHS--DHTTVNFDTWIRGFVRC DICRCLCDESKDS 174  
R YG + ++T + + + F C+ C C C++ ++  
Sbjct 395 G-----NRKFYKPKSCSGNNTLQVKNRNFNKLFEYCEYCVCTCEDI-NT 437

Query 175 ESIRSFSLNAVESDTKDNKVVIGVQLALKDKIFYFKIRQSPLLPLGKADQRKLSWKSDDP 234  
+ R FSL V SD++ + VV GV+ A K+ IF+ +I++ LL G D+ + WK D  
Sbjct 438 KINRYFSLKNVTSDSQYSYVVTGVRFAKKNIFHIQIQRGKLLVNGNIDKSSVDWKPVDN 497

Query 235 SLSSAS-----KDIFKLDVNRKSIHIGSATS NLSDVFVTVGVKFAEIDGNLALGVKLT KFD 289  
S +D +K+ N+R++++ + + L++ V+ G++F NL +++T F+  
Sbjct 498 FTVSDKHFDVDRDYKISWNQRTVYLDTLDAPLNN-VLIGLRFQVDGSNLKFEIQMTFPN 556

Query 290 VMSGKLMNDN-NQWIYNSLSKQKLNNGGVANRPIKFTDNH-ASEKLDLGLVEFRQSDLKD 347  
SG+L N +WI NS S++ + T N E L +F +S +  
Sbjct 557 FSSGELKKKNETRWISNSSSERTEIYLKNRDLGTSTQNSYHYEAGSNQLFKFTRSSFES 616

Query 348 DVGQSTVPFIDLRISIVSTG-TALIGVGLQFRTRDTSGGFIAPVVVTHP 394  
D GQ+ VPFIDL+ I ST L G GL R S GF++ ++T+  
Sbjct 617 DAGQNVVFPFIDLQEIESTPFVPLSGAGLILRNTKESAGFLSFKLLTYN 664

>  [ref|XP\\_001606530.1](#)  PREDICTED: similar to CG2206-PA [Nasonia vitripennis]  
Length=880

[GENE ID: 100122920 LOC100122920](#) | similar to CG2206-PA [Nasonia vitripennis]

Score = 378 bits (970), Expect = 7e-103, Method: Composition-based stats.  
Identities = 85/404 (21%), Positives = 165/404 (40%), Gaps = 51/404 (12%)

```
Query 9 SRTLNDVDPKEHIKGETYEEITRFNQVYFTQEANF---GSCNSKCEDYAAPRHNFKEDNR 65
SR L +P +HI+ TY E+ Q Y E + C ++C DY P
Sbjct 280 SRELWRNPNVQHIEDVTTYTELKHVFKYIINEYDISPGDQCKNQCSYRRPESKAPHRCA 339

Query 66 YK---FPQRQCTGTIYNCIGEKITEKEPVIRYQIKKPESPESDKRYYYVELPVNTDKKKY 122
Y+ C G +++C + + P +S +RY Y++
Sbjct 340 YQGEICEITHCDGYLFDQYK-----IDTEMSICPSGRDSSRRYDYID----- 382

Query 123 QYAIIEGSNYTYRYVYGN-KEHSDHTTVNFDTWIRGFVRCDICRCLCDESKDSESIRSFS 181
Y YG+ K + + G CD C C+C ++ R F+
Sbjct 383 -----YANGLRYGDSKHKCSMNPLTTTRKLSGLWWCDPCMCVCADTSKKSESR-FN 432

Query 182 LNAVESDTKDNKVVIGVQLALKDKIFYFKIRQSPLLPLGKADQRKLSWKSDDPSSLSSASK 241
L+ V +++ +N V+ G +L +++++ + +I++ LL G+ + L W + + S
Sbjct 433 LDPVMANSAENYVLTGARLVKRNMIHIQIQEGQLLQNGRINASTLRWSKINENPIS--- 489

Query 242 DIFKLDVN-KRSIHIGSATSNLSDFFVTVGVKFAEI-----DGNLALGVKLTDFVMSGK 294
L KR IH+ + + V+TG+ F I L L SG+
Sbjct 490 -YHTLQWEQKREIHLDDLMA-PKNHVLTLGLSFTTIQVDSAYTKRLKQLQAYAAPLYFHSGE 547

Query 295 LMNDNNQWI----YNSLSKQKLNNGGVANRPIKFTDNHASEKLDLGLVEFRQSDLKDDVG 350
+++ + + ++ + + P + + ++ ++F + L DVG
Sbjct 548 VIDKHQMPLYPKDFSPTNATNEIKLDNLDVPTRTSVQTVTKSKQDQFLKFGPTGLDKDVG 607

Query 351 QSTVPFIDLRISIVSTG-TALIGVGLQFRTRDTSGGFIAPVVVTH 393
QST+PFID++ + ++ + G G+ ++R +GGF+A + ++
Sbjct 608 QSTIPFIDIQEVTTSPAIPMSGAGIYHKSRSNGGFLALRLFSY 651
```

Score = 52.8 bits (125), Expect = 7e-05, Method: Composition-based stats.  
Identities = 9/48 (18%), Positives = 18/48 (37%), Gaps = 1/48 (2%)

```
Query 8 FSRTLNDVDPKEHIKGETYEEITRFNQVYFTQEANFGSCNSKCEDYAA 55
S DP H++ +T+ ++ QV + +C +Y
Sbjct 815 SSTEYFRGDPNNHVEDKTFTQLKNVMQVIAMNMIDINRA-DRCYNYCD 861
```

>  [gb|EFA08552.1](#) hypothetical protein TcasGA2\_TC006207 [Tribolium castaneum]  
Length=607

Score = 372 bits (954), Expect = 6e-101, Method: Composition-based stats.  
Identities = 100/387 (25%), Positives = 163/387 (42%), Gaps = 43/387 (11%)

```
Query 21 IKGETYEEITRFNQVYFTQEANF---GSCNSKCEDYAAPR-HNFKEDNRYKFPQRQCTGT 76
+ +TY I F +A+ G C ++C+ Y + +N++ Q
Sbjct 228 KQDQTYLRIQGNFLHACIFNKAHLDPKGCQNECDAYKMTKPQENCRENKWCNKQLP-ASR 286

Query 77 IYNCIGEKITEKEPVIRYQIKKPESPESDKRYYYVELPVNTDKKKYQYAIIEGSNYTYRY 136
I NC + V + + +++++RY YVEL
Sbjct 287 IINCQ--YLDSSMTVCSNK---NTRKNNRRYQYVELG-----NGK 321

Query 137 VYGNKEHSDHTTVNFDTWIRGF-VRCDICRCLCDESKDSESIRSFSLNAVESDTKDNKVV 195
V G K+ + T+I RC C CLCDE + + +L ++ DN+VV
Sbjct 322 VLGKKQSCRGYKTDLSTYIYWIVWRCSYCFCLCDE-QSRGTDVYINLRLSLANMNDNRVV 380

Query 196 IGVQLALKDKIFYFKIRQSPLLPLGKADQRKLSWKSDDPSSLSSA---SKDIFKLDVNKRS 252
G++ ++IF+ +I++ LL GK D + W D KD K+ KRS
Sbjct 381 TGLRFVKHNEIFHLQIQEGKLLKRGKIDPDSVRWVPVDNYKHFDTIEGKDFHKITWEKRS 440

Query 253 IHIGSATSNLSDFFVTVGVKFAEIDGNLALGVKLTDFVMSGKLMNDNNQWIYNSL----- 307
+ + + + VVTGV+F I +L L V T F+ +GKL+ + +
Sbjct 441 FELSTIMAQ-NGSVVTVGRFRLIRNSLDLEVLTPPFNFTTGKLLPSLSTFKGTRNLNLRH 499
```

Query 308 SKQKLNNGGVANRPIKFTDNHASEKLDLGLVEFRQSDLKDDVQSTVFPFIDLRSIVS-TG 366  
 ++ + P T+ H + +EFR +DL D+ Q+TVPF D + + S  
 Sbjct 500 KFKQQVKLSKPDVPTGSTEPH-TLITTGQYIEFRNTDLYKDLAQTTVPFFDSQPVNSKNP 558

Query 367 TALIGVGLQFRTRDTSGGFIAPVVVTH 393  
 L GV L + R+ SGGFIAP + T+  
 Sbjct 559 VPLSGVSLIHKGREGSGGFIAPKIFTY 585

> [gb|EFA12872.1](#) hypothetical protein TcasGA2\_TC010724 [Tribolium castaneum]  
 Length=1530

Score = 366 bits (939), Expect = 3e-99, Method: Composition-based stats.  
 Identities = 97/396 (24%), Positives = 163/396 (41%), Gaps = 49/396 (12%)

Query 22 KGETYEEITRFNQVYFTQEANFG---SCNSKCEDYAAPRHNFK-EDNRYKFPQRQCT--- 74  
 +G+TY EIT F Y + N C ++C+ + + + C+  
 Sbjct 41 EGKTYLEITNFLHGYIINKKNLNPYQRCENECDSFKMTTQNCVYEKEWCKEIPCSKII 100

Query 75 -----GTIYNCIGEKITEKEPVIRYQIKKPESPEKRYYYVELPVNTDKKKYQYAIIE 128  
 T++ C I + K P+ ++RY+++L T  
 Sbjct 101 SCTSLHSTMHVCTAVSIRPLLGITTVSFKNL--PKDNRRYHHIKLSNGT----- 147

Query 129 GSNYTYRYVYGNGKEHSDHTTVNFDTWIRGFVRCDCRCLCDESKDSESIRSFSLNAVESD 188  
 +G K T+ C C CLC+E + S S R +L +++  
 Sbjct 148 -----FFGPKRQCTGNI-KIHTYSYRNSYCPYCFCLCEEGQVSYSERYVNLRIITKAN 198

Query 189 TKDNKVVIGVQLALKDKIFYFKIRQSPLLPLGKADQRKLSWKSDDPSLSSASK-----DI 243  
 DN+VV G++ ++I + I++ LL G D + + W D  
 Sbjct 199 ISDNRVVTGLRFIKHNQIVHLHIQEGKLLKGYVDPKTVQWVPPDNYKIDDRNIYEEEDY 258

Query 244 FKLDVNKRSIHIGSATSNLSDFFVTVGVKFAEIDGNLALGVKLTKFDVMSGKLMNDNNQW- 302  
 L +RS+ + + VV GV+F + G + L V T FD +GKL DN W  
 Sbjct 259 HTLSWEERSLELTEIVAE-EGSVVIGVRFKKTLLGGVKLEVLTTTFDFDTGKL-EDNTTWN 316

Query 303 -IYNSLSKQKLN---NGGVANRPIKFTDNHASEKLDLGLVEFRQSDLKDDVQSTVFPFID 358  
 N+++ +N + PI + + + + + F +D D GQ+TVPF D  
 Sbjct 317 IFKNTITPNLINQEIKLSDPIPI-HKNLASIDFSENTYINFNTDLYDKDAGQTTVPFFD 375

Query 359 LRSIVST-GTALIGVGLQFRTRDTSGGFIAPVVVTH 393  
 + + ST T L G+GL + R SGGFI P ++T+  
 Sbjct 376 AQPVYSTAPTPLSGIGLPHKGRKSGGFITPKILTY 411

> [gb|ACM40897.1](#) putative cysteine endopeptidase [Culicoides nubeculosus]  
 Length=395

Score = 365 bits (937), Expect = 6e-99, Method: Composition-based stats.  
 Identities = 197/391 (50%), Positives = 266/391 (68%), Gaps = 26/391 (6%)

Query 9 SRTLDNVDPKEHIKGETYEEITRFNQVYFTQEANFGSCNSKCEDYAAPRHNFKEDNRYKF 68  
 S L N+DPK+H+KGETY E+TRFNQVYFTQEANFGSCNSKC DY+ P+HNF+E + Y+F  
 Sbjct 24 SSELYNLDPKQHVKGETYGEVTRFNQVYFTQEANFGSCNSKCSYKQHNFRSDESQYF 83

Query 69 PQRQCTGTIYNCIGEKITEKEPVIRYQIKKPESPEKRYYYVELPVNTDKKKYQYAIIE 128  
 QR CTGTI++C E+ + V Y+++ P+S + D RYYYY +  
 Sbjct 84 DQRTCTGTIHSNNEEREDNSHVDNYKVRVPQSSKVDARYYYV-----FKQ 129

Query 129 GSNYTYRYVYGNGKEHSDHTTVNFDTWIRGFVRCDCRCLCDESKDSESIRSFSLNAVESD 188  
 + ++YVYGN + S++ TV F++W+RGFV C ICRC+CDE D S+RSFSLN++ESD  
 Sbjct 130 FAPKMFQVYVGNIDASNYRTVTFNSSWVRGFMCAICRCICDEPNDRSVRSFSLNSLES 189

Query 189 TKDNKVVIGVQLALKDKIFYFKIRQSPLLPLGKADQRKLSWKSDDPSLSSASKDIFKLDV 248  
 T NKV+ GVQ+ ++ +F KI QS L GK ++ SWKSD+P+ + F L  
 Sbjct 190 TLQNKVITGVQIVQQNNVFLKIHQSCLYANGKINKNGGSWKSNDPNN-----NTFNLA 244

Query 249 NKRSIHIGSATSNLSD-----FVVTGVKFAEIDGNLALGVKLTKFDVMSGKLMNDNNQW 302  
 NK +IH+GS+ + +D +VVTGVKFA+I+GNLALGVK T F++ +GKL+ +W  
 Sbjct 245 NKHNIHMGSILSTADPKKTREYVVTGVKFIADIEGNLALGVKFTLFEISTGKLL-PEQKW 303

Query 303 IYNSLSKQKLNNGGVANRPIKFTDNHASEKLDLGLVEFRQSDLKDDVQSTVFPFIDLRSI 362

Sbjct 304 ++NS SK LN +RPI++TDN + + LGL++F S L DDVGQSTVPPF+DL+ I  
VFNSFSKNLLNHYKHGHRPIEYTDNIPTAQTKLGLIQFEHSHLHDDVGQSTVPPFVDLQPI 363

Query 363 VSTGTALIGVGLQFRTRDTSGGFIAPVVVTH 393  
S TAL GVGL R R +SGGFIAP + T+

Sbjct 364 NSNETALSGVGLHLRGRKSSGGFIAPTLTTY 394

>  [ref|XP\\_001851115.1|](#)  conserved hypothetical protein [Culex quinquefasciatus]  
[gb|EDS33068.1|](#)  conserved hypothetical protein [Culex quinquefasciatus]  
Length=548

[GENE ID: 6041925 CpipJ\\_CPIJ009488](#) | hypothetical protein  
[Culex quinquefasciatus]

Score = 360 bits (924), Expect = 2e-97, Method: Composition-based stats.  
Identities = 86/321 (26%), Positives = 138/321 (42%), Gaps = 42/321 (13%)

Query 8 FSRTLNDVDPK--EHIKGETYEEITRFNQVYFTQEANFGS---CNSKCEDYA-APRHNFK 61  
SR DP+ + +GET+ +ITR Q Y E + + C C Y+ R

Sbjct 257 ASRDYWRCDPERSQQKEGETFVQITRLLQGYVENEVDMNTDNTCKENCAYYSWGARQEQC 316

Query 62 EDNRYKFPQRQCTGTIYNCIGEKITEKEPVIRYQIKKPESPEKRYYYVELPVNTDKKK 121  
+ Y Q +C+G IY+C E + P + S++RY Y+E

Sbjct 317 FKDLYCSKQPKCSGKIYDC-----EYLDSDMWICPAATSSNRRYEYIE----- 359

Query 122 YQYAIIEGSNYTYRYVYGNKEHSDHTTVNFDTWIRG-FVRCDICRCLCDESKDSEIRSF 180  
Y V G K+H + D+W R F C C CLCD++ S R

Sbjct 360 -----YENGMVLGQKKHCARGSTKVDSSWRWLFWHCSYCFCLCDDA-GKNSDRYI 408

Query 181 SLNAVESDTKDNKVVIGVQLALKDKIFYFKIRQSPLPLGKADQRKLSWKSDDPS----- 235  
++ SD DNKVV G++ K++I + ++Q LLP G+ D L W +

Sbjct 409 NMRESVSDVMDNKVVTGMRFIKKNRIIHLIVQQGRLLPRGQIDNATLEWVQPEDYNVLS 468

Query 236 LSSASKDIFKLDVNRKRSIHIGSATSNLSDFVVTGVKFAEIDGNLALGVKLTKFDVMSGKL 295  
+D L+ + R I L +V+TG+V+F + +L L +++T+ D +G L

Sbjct 469 NVRNGRDYHTLNRDNR-ILDLDLQGYVLTGVRFRLLGSHLNLEIRMTEMDFATGHL 527

Query 296 MN-DNNQWIYNSLSKQKLNN 315  
M+ D + WI + ++ +

Sbjct 528 MDPDKSIWIGSDKTEHSDDKR 548

>  [ref|XP\\_001606517.1|](#)  PREDICTED: similar to CG2206-PA [Nasonia vitripennis]  
Length=662

[GENE ID: 100122910 LOC100122910](#) | similar to CG2206-PA [Nasonia vitripennis]

Score = 352 bits (902), Expect = 6e-95, Method: Composition-based stats.  
Identities = 88/400 (22%), Positives = 156/400 (39%), Gaps = 41/400 (10%)

Query 7 GFSRTLNDVDPKEHIKGETYEEITRFNQVYFTQEANF---GSCNSKCEDYAAPRHNFKED 63  
G SR L +P EH + TY E+ R Q + E + C C +Y P

Sbjct 277 GASRELMRFNPSEHKEDVYTELKRVFQEFIVNEYDVKPSDGCKKTCNSYRIPDGKALNG 336

Query 64 NRYK---FPQRQCTGTIYNCIGEKITEKEPVIRYQIKKPESPEKRYYYVELPVNTDKK 120  
Y + C G +Y+C + T I SD+ Y +V+

Sbjct 337 CFYADEVCSVKTCGDYLYDCRKKVDTMNVCI SPMF-----SDRNYEFVDFANGAG-- 387

Query 121 KYQYAIIEGSNYTYRYVYGNKEHSDHTTVNFDTWIRGFVRCDICRCLCDESKDSEIRSF 180  
Y G + T + + CD C C+C + S+S R F

Sbjct 388 --HYGHATGKCWAD-----TIKTAASHVSIPWSCDSCMCVCAD--TSSQSQRFF 432

Query 181 SLNAVESDTKDNKVVIGVQLALKDKIFYFKIRQSPLPLGKADQRKLSWKSDDPSLSSAS 240  
+LN + +N VV G + K+++ + +I++ LLP G + W + + ++

Sbjct 433 NLNPSMATIAENYVVTGARFVKKNRVVHIQIQEGQLLPNGMINSSTTRWAPINENPTT-- 490

Query 241 KDIFKLDVNK-RSIHIGSATSNLSDFVVTGVKFAEIDGN-----LALGVKLTKFDVMSGK 294  
D L R +++ + V+TG+ F+ + L L + +G+

Sbjct 491 LDYHTLAWENGREVNLDDLHAPKKS-VLTGLAFSTESTSNFQRRHLHLKIFSAPVSYETGR 549

Query 295 LMNDNNQWIYNSLSKQKLNNGGVANRPIKFTDNHASEKLDLGLVEFRQSDLKDDVVGQSTV 354  
 L ++ + N + + P + + A V+F + L+ DVGQST+  
 Sbjct 550 LWINDQKEKVNNEP-AKDEITLKDVDIPTRTSVVTADRSPKDSFVKFGPTGLEQDVGQSTI 608

Query 355 PFIDLRISIVSTG-TALIGVGLQFRTRDTSGGFIAPVVVTH 393  
 PFIDL+ + S+ + G G+ + R +GGF+ + ++  
 Sbjct 609 PFIDLQEVSSSPQIPMSGAGIYLKRRSNNGGFLTLKLSY 648

>  [gb|ACZ28336.1](#) hypothetical conserved protein [Simulium nigrimanum]  
 Length=408

Score = 350 bits (897), Expect = 2e-94, Method: Composition-based stats.  
 Identities = 97/404 (24%), Positives = 161/404 (39%), Gaps = 43/404 (10%)

Query 3 LPSLGFSRITLDNVDPKHEHIKGETYEEITRFNQVYFTQEANF-GSCNSKCEDYAAPRHNFK 61  
 LP L R+ D + T+ E+ + EA+ G+C++ C D+ PR  
 Sbjct 27 LPRL--ERSYWKCDADNWQRDVTFYELNKLMLYGLVEYEADVTGACSTGCYDFQKPRG--- 81

Query 62 EDNRYKFPQRQCTGTIYNCIGEKITEKEPVIRYQIKKPESPEKRYYYVELPVNTDKKK 121  
 ++P +C G I C P ++ E+ + + Y Y+ +  
 Sbjct 82 ITTLTQWPDYKCPGYIEACEAS-----PKETFECFNENAMAPETYSYISSDL----- 129

Query 122 YQYAIIEGSNYTYRYVYGNKEHS DHTTV-NFDTWIRGFVRC DICRCLCDESKDSEIRSF 180  
 G KE V ++ G +C+ C CLC S+ +E+ R  
 Sbjct 130 -----MRRGTKEQCRDEKVKVSSYTSVGFVKCEYCACLC-HSEGAEAHRYL 174

Query 181 SLNAVESDTKDNKVVIGVQLALKDKIFYFKIRQSPLPLGKADQRKLSWKSDD-----PS 235  
 SL S+ +N+V++GV+ +++ Y + ++PLLP D + W D P  
 Sbjct 175 SLLPQVSNIDENEVI VGVKFKVHNRLVYLQTMKAPLLPFASVDTDQAVWNEDELGLVPP 234

Query 236 LSSASKDIFKLDVNKRSIHIGSATS NLSDFVVTGVKFAEIDGNLALGVKLT KFDVMSGKL 295  
 ++ D R I + + V+TGVKF DG L ++ T D +G+L  
 Sbjct 235 DYHNFSGLYTFDHK HREILMKELEV-PAGTVLTGVKFI VKDGVDPDLSIRYTPVDWTTGEL 293

Query 296 MNDNNQWIYNSLSKQKLNNGGVAN-RPIKFTDNHASEKLDLGLVEFRQSDLKDDVVGQSTV 354  
 + WI + N+ N P + + F S ++ D GQ +  
 Sbjct 294 NPAASLWITEAHDAYD TNDMLYQNRLPDQCKTSPSIFDTASGQKFRFSTSAMELDGGQHVL 353

Query 355 PFIDLRISIVS-TGTALIGVGLQFRTRDTSGGFIAPVVVT-HPTY 396  
 P+ D + +V + L GVG+ + D GGF+PVV T H Y  
 Sbjct 354 PYFDAQPVPVSMVPLSGVGITHKGDDRCGGFISPVVFTVHEDY 397

>  [ref|XP\\_001601809.1](#)  PREDICTED: similar to GA15301-PA [Nasonia vitripennis]  
 Length=666

[GENE ID: 100117628](#) [LOC100117628](#) | similar to GA15301-PA [Nasonia vitripennis]

Score = 347 bits (890), Expect = 1e-93, Method: Composition-based stats.  
 Identities = 96/430 (22%), Positives = 175/430 (40%), Gaps = 78/430 (18%)

Query 8 FSRTLDNVDPKHEHIKGETYEEITRFNQVYFTQE-----ANFGSCNSKCEDYAAPRHNFK 62  
 SR + D ++H K TY ++ Q +F E +N+ + +C R K  
 Sbjct 262 ASREWVRCDTEKHEKDVYTSKLVQEVFQGGFFVYEPDTRSNWHA AVFRCSALKDDRLRCKS 321

Query 63 D-NRYKFPQRQCTGTIYNCIGEKITEKEPVIRYQIKKPESPEKRYYYVELPVNTDKKK 121  
 + + +R+CTG + +C + P SD+RY +++ T  
 Sbjct 322 APCKAQPEERRCTGH LRDCQS-----IAHNMQLCHSPPGSDRRYDWMKTGAGT---- 369

Query 122 YQYAIIEGSNYTYRYVYGNKEHS DHTTVNFDTWIRGFVRC DICRCLCDESKDSEIRSF 181  
 +YG +T +D + C C C ES+ ++ R FS  
 Sbjct 370 -----LYGRDGP CANTQGIWDIPPYLI---ENCLCNC-ESEQRDADRYFS 410

Query 182 LNAVESDTKDNKVVIGVQLALKDKIFYFKIRQSPLPLGKADQRKLSWKSDD----- 232  
 L V SD NKVV GV+L + +F+ +I+Q L G L WK  
 Sbjct 411 LLDVTSVDVQNKVVTVGRLRKHNVFHIQIQQGTLEANGTI-SGTLEWKEIKEISSDLL 469

Query 233 -----DPSLSSASKDIFKLDVNKRSIHIGSATS NLSDFV 266  
 D + + ++ + ++ +++++ S + +  
 Sbjct 470 SDKVSKHFYKVIANPHENFDKEFKYDDWTEFYKNDLVYAVTYDQNTVYLDLDDLSGP-NAL 528



Query 267 VTGVKFAEIDGNLALGVKLTKFVMSGKLMNDNNQWIYNSLSKQKLNN--GGVANRPIKF 324  
 +TG++F +++ +L L ++ T FD +GKL D + W N+ ++ + + P +  
 Sbjct 529 LTGLRFQQVNDLRLLEIQSTPFDYTTGKCLKTDQSSWTANTNTRPTRHEVFLTDPDDPTRT 588

Query 325 TDNHASEKLDLGLVEFRQSDLKDDVQGQSTVFPFIDLRS-IVSTGTALIGVGLQFRTRDTSG 383  
 ++ + V FR +DL+ D+GQ TVPF+DL+ + + + G GL R R SG  
 Sbjct 589 KESDNF-SKNKQFVFRFMTDLRHLDLGGYQTVPFLLDQDAVTTTPALPISGAGLFRHGRRLHSG 647

Query 384 GFIAPVVVTH 393  
 GF+ ++ +  
 Sbjct 648 GFLGFKLIHY 657

>  [ref|XP\\_001600223.1](#)  PREDICTED: similar to GA15301-PA [Nasonia vitripennis]  
 Length=497

[GENE ID: 100115520 LOC100115520](#) | similar to GA15301-PA [Nasonia vitripennis]

Score = 343 bits (880), Expect = 2e-92, Method: Composition-based stats.  
 Identities = 92/426 (21%), Positives = 158/426 (37%), Gaps = 54/426 (12%)

Query 8 FSRTLNDNVPKEHIKGETYEEITRFNQVYFT---QEANFGSCNSKCEDYAAPRHNFK-ED 63  
 SR + DPK HI+ TY E+ Q Y N +C C ++  
 Sbjct 91 ASRDVWRCDPKSHIEDVITYTELKEVFQKYVVNDEDMNENNNCKKTCGEFKYATVTNCANK 150

Query 64 NRY-----KFPQRQCTGTIYNCIGEKITEKEPVIRYQIKKPESPEKRYYYV 111  
 Y QR+C G +++C E I P + S +RY ++  
 Sbjct 151 QEYYDTEVQYYEYSICDQQRKCNLGFDCEDYFPDYNELWI-----CPSTLNSSRRYEFM 205

Query 112 ELPVNTDKKKYQYAIIEGSNYTYRYVYGNKEHSHTTVN-----FDTWIRGFVRCIDIRC 166  
 E G G+K+ D ++ + C++C C  
 Sbjct 206 EHGSVDPVIFKHDVRYG-----PKGDKKCDRHITYDYREFGQSFKDAWRYCEVCLC 258

Query 167 LCDESKDSESIRSFSLNAVESDTKDNKVVIGVQLALKDKIFYFKIRQSPLLPLGKADQRK 226  
 C + K S + ++ V +D ++ VV G +L K+ I + +I Q +L G+ D  
 Sbjct 259 TCHDFKSPTSEQQINVRPVVAD--NDYVVTGARLVKKNHILHVQIEQRKILADGRIDNST 316

Query 227 LSWKSDDPSLSSASKDIFKLDVN-KRSIHIGSATSNSLDFVVTGVKFAEI----DGNLAL 281  
 L WK+ D+ N R+I++ T + V+ G+K + ++  
 Sbjct 317 LHWKTIAEP--RNVYDLRSFSWNGFRITYL-EVTEVPKNHVLVGLKLTNLKNGDGQMMMSF 373

Query 282 GVKLTKFVMSGKLMNDNNQWIYNSLSKQKLNNGG-----VANRPIKFTDNHASEKLDL 335  
 +D +G+L D + Y+ K L + + P +  
 Sbjct 374 KTLSPVYDYSTGELTYDGSY--YDEPEKLDLDRQAEVSVENCCLPQNTHFPSLPQPDSK 431

Query 336 GLVEFRQSDLKDDVQGQSTVFPFIDLRSI-VSTGTALIGVGLQFRTRDTSGGFAPVVVT-- 392  
 ++F D K D+GQS +PFID++ + L G+G + R+ GGF+ +VT  
 Sbjct 432 KTIKFTTLDFFKDLGQSMIPFIDIQEFISIRPAAPLAGIGFYHKGREGYGGFVGLKLVTFD 491

Query 393 HPTYTG 398  
 H + G  
 Sbjct 492 HSPHIG 497

>  [ref|XP\\_001602724.1](#)  PREDICTED: similar to CG2206-PA [Nasonia vitripennis]  
 Length=894

[GENE ID: 100118844 LOC100118844](#) | venom protein W [Nasonia vitripennis]

Score = 340 bits (871), Expect = 2e-91, Method: Composition-based stats.  
 Identities = 90/399 (22%), Positives = 170/399 (42%), Gaps = 41/399 (10%)

Query 7 GFSRTLNDNVPKEHIKGETYEEITRFNQVYFTQEANF---GSCNSKCEDYAAP--RHNFK 61  
 R L H+ T+ E+ Q Y EA+F GSC C+D+ +  
 Sbjct 509 RAQRNLGQSAPTHV---TFAELKNVFSYVINEADFKKEGSCGHTCKDFKLALAGLDCY 565

Query 62 EDNRYKFPQRQCTGTIYNCIGEKITEKEPVIRYQIKKPESPEKRYYYVELPVNTDKKK 121  
 D ++ ++C+GT+++C+ + E E S +RY Y+++  
 Sbjct 566 YDKQFCKKHQRCSGTLHDCVHQFDEE-----MFVCLLEKNSTRRYQYIDVG----- 611

Query 122 YQYAIIEGSNYTYRYVYGNKEHSHTTVNFDTWIRGFVRCIDIRCCLCDESKDSESIRSFS 181  
 YQ +E + + + ++ +S H CD C CLCD+ ++ R FS

Sbjct 612 YQRYGLEDKSCPSKAIELDRHYSAHN-----MAYCDSCMCLCDDDAHPKTERYFS 661

Query 182 LNAVESDTKDNKVVIGVQLALKDKIFYFKIRQSPLLPGLKADQRKLSWKSDDPSLSSASK 241  
L + + K+N V+ G +L +++ + +I+Q LLP G ++ + W + + +

Sbjct 662 LISSIAAVKENYVLTGARLVKRERTIHVQIQGQLLPYGHVNESTVEWVPIKADVLAKDE 721

Query 242 DIFKLDV-NKRSIHIGSATSNSLSDFFVTGVKFAEIDGN---LALGVKLTkFDVMSGKLM 296  
++K+ R++ + ++ VV G+ F + N L L + +G L

Sbjct 722 -VYKIKWLGSRVFLDDIEVPRNN-VVVLGFKAPEQNNIKVLRRLVAYSAPMNYAGVLT 779

Query 297 NDNQWQIYNSLSKQKLNNGGVANRPIKFTDNHASEKLDLGLVEFRQSDLKDDVGGQSTVPF 356  
++ + ++S + P + + + + V+FR + L DVGQST+PF

Sbjct 780 SETYE-SHSSEESSDEVVLELDLIPTRRSSQIVQKSANHQYVKFRITSLLLTDVGGQSTIPF 838

Query 357 IDLRSIVSTGT-ALIGVGLQFRTRDTSGGFIAPVVVTHP 394  
ID +S+ + + G G+ R GGF+A + T

Sbjct 839 IDSQSVTTNPASPMSGAGIYHRRSSGDGGLALKLFTFN 877

>  [ref|XP\\_001810077.1](ref|XP_001810077.1) PREDICTED: similar to GA15301-PA [Tribolium castaneum]  
Length=426

[GENE ID: 100142514](GENE_ID:100142514) <LOC100142514> | similar to GA15301-PA [Tribolium castaneum]

Score = 337 bits (865), Expect = 1e-90, Method: Composition-based stats.  
Identities = 89/391 (22%), Positives = 153/391 (39%), Gaps = 79/391 (20%)

Query 24 ETYEEITRFNQVYFTQEANFG---SCNSKCEDYAAPRHNFKEDNR---YKFPQRQCTGTI 77  
+TY EIT F Y + N C ++C+ + +D+ + F + C+ I

Sbjct 82 KTYLEITNFLHGYIINKKNLDPKKQCVNECDSEFKMTAIQNCDDDDIDEPWCFKESPCS-RI 140

Query 78 YNCIGEKITEKEPVIRYQIKKPESPEKRYYYVELPVNTDKKKYQYAIIEGSNYTYRYV 137  
+C +

Sbjct 141 ISCT-----YIDSSMDVCLA----- 155

Query 138 YGNKEHSDHTTVNFDTWIRGF-VRCDICRCLCDESKDSEISIRSFSLNAVESDTKDNKVVI 196  
+N T+ +C C CLCDE + S S R +L S+ DN+VV

Sbjct 156 -----INLATYSESLIFKCSYCFCLCDEGQGSYSYDRYINLRISMSNISDNRVVT 204

Query 197 GVQLALKDKIFYFKIRQSPLLPGLKADQRKLSWKSDDPS-----LSSASKDIFKLDVNKR 251  
G++ ++I + ++++ LL G + + W + +D + +R

Sbjct 205 GLRFIKHNRIVHLQVQEGKLEKGNINPTTVQWVPPEDYKITDRDIYKGDYHTISWEER 264

Query 252 SIHIGSATSNSLSDFFVTGVKFAEIDGNLALGVKLTkFDVMSGKL-MNDNNQW-----I 303  
+I + + + VVTGV+F G+L L V T FD +GKL N ++ W

Sbjct 265 TIELTKVIAK-AGSVVTGVRFKRTFGSLNLQVLTAFDFNTGKLEKNSDSDWGIFESAPY 323

Query 304 YNSLSKQKLNNGGVANRPIKFTDNHASEKLDLGLVEFRQSDLKDDVGGQSTVPFIDLRSIV 363  
+N K +L + T+ ++ + +EF +D + D GQ+T+PF D +++

Sbjct 324 FNIRHKFRLKVNLPDVPVRTNLDFTDFSENMYIEFANTDYRKDAGQTTIPFFDAQAVN 383

Query 364 S-TGTALIGVGLQFRTRDTSGGFIAPVVVTH 393  
S T T L G+GL + R GGFIAF ++T+

Sbjct 384 STTPTPLSGIGLPHKGRKGYGGFIAPKIITY 414

>  <gb|ACE75210.1> conserved hypothetical protein [Glyptapanteles flavicoxis]  
Length=645

Score = 330 bits (846), Expect = 2e-88, Method: Composition-based stats.  
Identities = 90/427 (21%), Positives = 163/427 (38%), Gaps = 77/427 (18%)

Query 12 LDNVDPKHEHIKGETYEEITRFNQVYFTQE-----ANFGSCNSKCEDYAAPRHNFK----- 62  
L DP + I+GET+ E Q E + C+++C+ R

Sbjct 217 LQRCDPPKDIRGETFSEFQGLFQGIINELQTDSIDTTHCHNQCDAVDYSRLVRCYSFDA 276

Query 63 --DNRYKFPQRQCTGTIYNCIGEKITEKEPVIRYQIKKPESPEKRYYYVELPVNTDKK 120  
++ C G + C I + S +R+ + + +

Sbjct 277 GNRTITHCHKKPCNGLLSACQ-----WIGFIKACEMYENSSRRFLW----SDDVNE 323

Query 121 KYQYAIIEGSNYTYRYVYGNKEHSDHTTVNFDTWIRGFVRCDICRCLCDESK-DSESIRS 179  
Y G T+ YV W RC +CRC+C E + +S ++R+

Sbjct 324 DSSYRKCPGRLVTFDYV-----WQNDVSRCSVCRCICVEQEGNSTAMRT 367

Query 180 FSLNAVESDTKDNKVVIGVQLALKDKIFYFKIRQSPLLPLGKADQRKLSWKSDDP----- 234  
 SL +D N V+ GV+ A KD+IF+ +I QS L P G+ + WK

Sbjct 368 ISLIPQLADIHRNMVMTGVRFAQKDRIFHLQIEQSELGPFGEIVPGTVEWKELGDFQYDS 427

Query 235 -----SLSSAS-----KDIFKLDVNKRSIHIGSATSNSLDFVVTGVKFAE--IDGN 278  
 D + +++R+I++ +N V+ GV+F +D

Sbjct 428 TGEFSFSIKKGGDEFVKLTFEVDVDFSFVALDQRTINLDELDFAND-GQVLIGVRFIYNGMDDA 486

Query 279 LALGVKLTKFDVMSGKLMNDNN---QWIYNSLSKQKLNNGGVA-----NRPIKFTD 326  
 L VK D+ +GKL + N +WI + ++++ N + P+

Sbjct 487 FELQVKSWPVDIRTGKLADGNPSDVEWIGSENAQKRSENYDGPRSTFEIGETDEPLSTNK 546

Query 327 NHASEKLDLGLVEFRQSDLKDDVVGQSTVFPFIDLRSIVSTG--TALIGVGLQFRTRDTSGG 384  
 + + + R ++ +DD+ Q TVP++DL+ + + L G+ + +R + GG

Sbjct 547 LNIPLSVPNQKLMIRATNFEDDLHQHTVPYLDLQPVYSTAKIPLSGLEIIYRGVEGFGG 606

Query 385 FIAPVVV 391  
 F+ +

Sbjct 607 FLGFRIF 613

>  [ref|XP\\_001601835.1|](#)  PREDICTED: similar to ef hand protein [Nasonia vitripennis]  
 Length=796

[GENE ID: 100117668 LOC100117668](#) | similar to ef hand protein  
 [Nasonia vitripennis]

Score = 322 bits (824), Expect = 7e-86, Method: Composition-based stats.  
 Identities = 91/392 (23%), Positives = 164/392 (41%), Gaps = 54/392 (13%)

Query 9 SRTLNDVDPKEHIKGETYEEITRFNQVYFTQEAN-----FGSCNSKCEDYAAPRHNFKED 63  
 R L DP H K TY + Q F E + + + +CE + R +

Sbjct 141 DRKLLRADPDSHQKDITYSRLYPVLQGVFIYEPDTTAGGWYTFWHQCESLKSTRLKVDPH 200

Query 64 NRYKFPQRQCTGTIYNCIGEKITEKEPVIRYQIKKPESPEKRYYYVELPVNTDKKKYQ 123  
 + C G + +C + P + D+ Y +

Sbjct 201 -----KSCAGVLRDCR-----YIDSSIDICPST-TDDRIYSW----- 231

Query 124 YAIIEGSNYTYRYVYGNKEHSDHTTVNFDTWIRGFVRCDCICRCLCDESKDESIRSFSLN 183  
 + VYG+K +S+ +T+ G + D+C C C ES + R F L

Sbjct 232 -----AVTKSNDVYGHK-NSECPVKLQNTY--GVLTYDVCLCTC-ESAYVQKDRYFCLR 281

Query 184 AVESDTKDNKVVIGVQLALKDKIFYFKIRQSPLLPLGKADQRKLSWKSDD---PSLSSAS 240  
 V SD+ +NKV+ G +L K + Y +I+Q L G W+ P +

Sbjct 282 NVVSDSDNNKVITGARLVKKGNVLYIQIQQGTGANGSIV-DVPQWQPVKESPRNLHNN 340

Query 241 KDIFKLDVNKRSIHIGSATSNSLDFVVTGVKFAEIDGNLALGVKLTKFDVMSGKLMNDNN 300  
 K+++++ ++ ++ + S + + +TG++F + + +L L ++T F+ +G L N+

Sbjct 341 KNVYQVNYDQNTVFLDLKSQPA-YALTGLRFQKAENSLRLEAQITNFNYETGNLRLTNS 399

Query 301 QWIYNSL--SKQKLNNGGVANRPIKFTDNHASEKLDLGLVEFRQSDLKDDVVGQSTVFPID 358  
 W+ N ++ + PI +++ + V FR ++L+ D+GQ+ VPFID

Sbjct 400 -WLSNPNGLETRERLKLVPDVPPIIMPEHNKI-THNNRYVSFRMTNLRKDLGQTIIVPFID 457

Query 359 LRSIVS-TGTALIGVGLQFRTRDTSGGFIAPV 389  
 + IV+ L G GL + R SGGF+

Sbjct 458 TQEIVTNPMPPLAGAGLYHKGRKHS GGFLGQK 489

>  [gb|ABY19389.1|](#) venom protein 2 [Microctonus hyperodae]  
 Length=679

Score = 314 bits (805), Expect = 1e-83, Method: Composition-based stats.  
 Identities = 106/422 (25%), Positives = 164/422 (38%), Gaps = 81/422 (19%)

Query 8 FSRTLNDVDPKEHIKGETYEEITRFNQVYFTQEANFG--SCNSKCEDYA-----APRHN 59  
 S TLD DPK +GE + E+ + Q++ E + SC+ C + R+

Sbjct 268 ASLTLDYCDPKNFTRGENFVELEKSIQMFVGVNEVDINGNSCSDVCSNIDSSGIRSDARNC 327

Query 60 FKEDNRYKFPQRQCTGTIYNCIGEKITEKEPVIRYQIKKPESPEKRYYYVELPVNTDK 119

```

      K +      P + C G IY+CI      S +RY +VE
Sbjct 328 DKNNGNSWCPLQSCYGRYDCISASTAS-----VCELGKSSLRRYDWVE----- 371
Query 120 KKYQYAIIEGSNYTYRYVYGNKEHSDHTTVNFDTWIRGFVRCDICRCLC-DESKDSESIR 178
      ++ + YGN + N + G CD+C C C DE +S + R
Sbjct 372 -----DHYNNHNYGNTNSCNGRIRNPSYYRSGLTSCDVCICTCADEIGESPANR 420
Query 179 SFSLNAVESDTKDNKVVIGVQLALDKIFYFKIRQSPLPLGKADQRKLSWKSDDPSLS- 237
+ +L S+ + N V+ GV+ DKI + +I++ L+ G+ W +
Sbjct 421 TINLRPQLSNIEANMVITGVKFISSDKIHIQIKEGELMSGGRIKPETEHWIEPENFEYD 480
Query 238 -----SASKDIFKLDVNKRSIHIGSATSNLSDFVVTGVKFA 273
      D + +R I++ + S +VVTGVKF
Sbjct 481 PKGILKSRKVGSSFFLSTGNKMTLMKHGMDFTFVTFQREINLDDVKA-PSGYVVTGVK 539
Query 274 EIDG-----NLALGVKLTKFDVMSGKLMNDNNQWIYNSLSKQKLNNGGV----- 317
      L L + +TKFD ++G LM D++ WI + N G+
Sbjct 540 REGNDTDGLSRRRLQLAIYVTKFDFLNGVLMKDSYWISQENMPNRPENYGLRRNEVELS 599
Query 318 -ANRPIKFTDNHASEKLDLGLVEFRQSDLKDDVGQSTVPFIDLRISIVST-GTALIGVGLQ 375
+ P K D H V+V SD +D GQ+T+PF D +S+ ST TAL G+GL
Sbjct 600 APDDPTKGGK-DHKQISKPGQYVVKFTTSDRVNDAGQATIPFFDGQSVTSTISTALSGLGLF 658
Query 376 FR 377
      R
Sbjct 659 HR 660

```

>  [gb|ACZ28338.1](#) hypothetical conserved protein [Simulium nigrimanum]  
Length=522

Score = 309 bits (791), Expect = 5e-82, Method: Composition-based stats.  
Identities = 94/401 (23%), Positives = 157/401 (39%), Gaps = 50/401 (12%)

```

Query 7 GFSRTLNDVDP--KEHIKGETYEEITRFNQVYFTQEANF-GSCNSKCEDYAAPRHNFKED 63
      SR +P EH T+ ++ +F Y E++ G+C C R
Sbjct 146 KVSRYDWVCNPSVNEHT---TF-QMNKFIYGYMDIESDLTGTCTGTCTCN----LRLQRGIV 197
Query 64 NRYKFPQRQCTGTIYNCIGEKITEKEPVIRYQIKKPESPEKRYYYVELPVNTDKKKYQ 123
      QR+C G + +C ++ ++ E+ Y Y++ V
Sbjct 198 AMTNEVQRKCVGLVSHCRTTSDQ-----TFEYCFAKNEEASYMYEYIKNDVIK----- 245
Query 124 YAIIEGSNYTYRYVYGNKEHSDHTTVNF---DTWIRGFVRCDICRCLCDESKDSESIRSF 180
      G+KE + GFV+CD C C C ES+D E+ R
Sbjct 246 -----RGSKEMCSSDINPLQHKHAYTAGFVKCDYCVCEC-ESEDDETHRYL 290
Query 181 SLNAVESDTKDNKVVIGVQLAL-KDKIFYFKIRQSPLPLGKADQRKLSWKSDDPSLSSA 239
SL S+ +NKV++G++ + K+ +++++PL P G D+ K W+ DP L
Sbjct 291 SLLPQMSNIVENKVIVGMKFTKYETKLISLQVKEAPLQPYGYVDETKAEWRDLDPMLLPN 350
Query 240 SK----DIFKLDVNKRSIHIGSATSNLSDFVVTGVKFAEIDGNLALGVKLTKFDVMSGKL 295
+ + R+I + L V+TG+KF ++G + ++ T F+ SG +
Sbjct 351 TYWDYPGYHIMSGKLRAIRMKKLEGPLH-TVLTGIKFI VVNGVPDISIRHTYFNFTSGVM 409
Query 296 MNDNNQWIYNSLSKQKLNNGGVANRP IKFTDNHASEKLDLGLVEFRQSDLKDDVGQSTVP 355
+ + WI + K + P + + F + L D G VP
Sbjct 410 QPEKSYWITETHDDPKPIDYNGLPEPGACATL-FPDTKSGQKILFGHNGL-GDAGSKVVP 467
Query 356 FIDLRISIVS-TGTALIGVGLQFRTRDTSGGFIAPVVVTHPT 395
F D + +V AL G G+ + GG +APVV T P
Sbjct 468 FFDSQPVVDPKPLALSGAGILHKG AQNCGGLVAPVVVTLPE 508

```

>  [ref|XP\\_001603579.1](#)  PREDICTED: similar to GA15301-PA [Nasonia vitripennis]  
Length=612

[GENE ID: 100119874](#) [LOC100119874](#) | similar to GA15301-PA [Nasonia vitripennis]

Score = 308 bits (790), Expect = 5e-82, Method: Composition-based stats.  
Identities = 88/415 (21%), Positives = 166/415 (40%), Gaps = 74/415 (17%)

```

Query 23 GETYEEITRFNQVYFTQEAN-----FGSCNSKCEDYAAPRHNFKED-NRYKFPQRQCTGT 76

```

Sbjct 221 G+T+ ++ Q +FT +++ + CE R + + + +R+C G 280  
 Query 77 IYNCIGEKITEKEPVIRYQIKKPESPEKDRYYYVELPVNTDKKKYQYAIIEGSNYTYRY 136  
 + +C E V ++ P+SD+RY + + + + +  
 Sbjct 281 LRDC-----EYVAKWFQICHAPPKSDRRYDWIKIYKGGEYTDIHGV----- 321  
 Query 137 VYGNKEHSDHTTVNFDTWIRGFVRCIDICRCLCDESKDSESIRSFSLNAVESDTKDNKVVI 196  
 E D+T TW C C C ES+ E R FSL V+SD DNKV+  
 Sbjct 322 ---QNERCDNTQGVGSTWP-----FHTCACNC-ESESREEDRFFSLLDVKSIDGDNKVIT 372  
 Query 197 GVQLALKDKIFYFKIRQSPLLPLGKADQRKLSWKSDDPS----- 235  
 G++L K +++ +I+Q L WK+ D  
 Sbjct 373 GLRLVKKGHVYHIEIQQGTGLGINASIIDAS-QWKNTDELFNQTTLSSEIATYHYQQISS 431  
 Query 236 -----LSSASKDIFKLDVNRKSIHIGSATSNLSDFFVVTGVKFAEIDGNLA 280  
 + +F + ++ + + + + D V+TGV+F + L  
 Sbjct 432 PQQNDYRITMFNEWVDWHKNNLVFSVTYDQSAVNLNLTRELGPED-VLTGVRFHQSGSALD 490  
 Query 281 LGVCLTKFDVMSGKLMNDNNQWIY-NSLSKQKLNNGGVANRPIKFTDNHASEKLDLGLVE 339  
 + V T FD +G+L N +WI+ N K + P+ + K + +  
 Sbjct 491 IQVHGTFPFDYATGRDLTKNGRWIFINRARNVKEIVLKDPDIPVNSKKSDFRFSKNNNEFIR 550  
 Query 340 FRQSDLKDDVQGQSTVPFIDLRSIVS-TGTALIGVGLQFRTRDTSGGFIAPVVVTH 393  
 FR+++ + DVGQ+ +P++D++ IV+ L G G+ + ++ GGF+ +V +  
 Sbjct 551 FRRTNFRKDVQNVIPYLDIQDIVTNPPPIPLSGAGIYHKYQEGYGGFLLGLKIVHY 605

>  [gb|ACH56860.1](#) hypothetical protein [Simulium vittatum]  
 Length=351

Score = 307 bits (786), Expect = 2e-81, Method: Composition-based stats.  
 Identities = 82/367 (22%), Positives = 137/367 (37%), Gaps = 39/367 (10%)

Query 37 FTQEANFGSCNSKCEDYAAPRHNFKEDNRYKFPQRQCTGTIYNCIGEKITEKEPVIRYQI 96  
 F + + G C + C + PR R C G I C ++  
 Sbjct 3 FESDLSLGHCKTACYELQQPRQMNLVKRM---SNRSCNGYIGQCGASSK-----GTFEY 53  
 Query 97 KKPEPESDKRYYYVELPVNTDKKKYQYAIIEGSNYTYRYVYGNKEHSDHTTVN-FDTWI 155  
 + + + Y YV V G+KE V T++  
 Sbjct 54 CYSNNEFASEMYSYVSSDV-----MRKGSKELCQGEVKS SVSTYL 93  
 Query 156 RGFVRCIDICRCLCDESKDSESIRSFSLNAVESDTKDNKVVIQVQLALKDKIFYFKIRQSP 215  
 G C+ C C+C S+D + R SL S+ +N++++GV+ + + + Y +I Q+P  
 Sbjct 94 SGVFHCEYCACIC-HSEDKTAHRFLSLLPQFSNIDENQIIVGVRFVKNRNVLYLQIMQAP 152  
 Query 216 LLPLGKADQRKLSWKSDD-----PSLSSASKDIFKLDVNRKSIHIGSATSNLSDFFVVTGV 270  
 LLP D W+ D P + D R + + + + +TGV  
 Sbjct 153 LLPYAAVDMDSAERWDIDELGMLPPEHTNLSGYHAFDHKNREMYMKELEV-PGGSLLTGV 211  
 Query 271 KFAEIDGNLALGVCLTKFDVMSGKLMNDNNQWIYNSLSKQKLNNGGVAN-RPIKFTDNHA 329  
 KF DG L ++ T + +G+L ++ W+ N+ N P +  
 Sbjct 212 KFIIDKGVPLDSIRYTFVNWTTGELNQSSSLWMTEKHDTYDTNDMLYQNQLPDQCKTSPF 271  
 Query 330 SEKLDLGLVEFRQSDLKDDVQGQSTVPFIDLRSIVSTGT-ALIGVGLQFRTRDTSGGFIAP 388  
 + F S L D Q +P+ D + +V L G+G+ + D GGFI+P  
 Sbjct 272 IDTASQRFRFGTSALDQDGAQHVLPHYFDAQPVVPMMPVPLSGIGVTHKGDDRCGGFISP 331  
 Query 389 VVVTHPT 395  
 VV T  
 Sbjct 332 VVFTVNE 338

>  [ref|XP\\_002040062.1](#)  GM15999 [Drosophila sechellia]  
[gb|EDW56927.1](#)  GM15999 [Drosophila sechellia]  
 Length=549

[GENE ID: 6615691 Dsec\GM15999](#) | GM15999 gene product from transcript GM15999-RA  
 [Drosophila sechellia] (10 or fewer PubMed links)

Score = 306 bits (784), Expect = 3e-81, Method: Composition-based stats.

Identities = 76/322 (23%), Positives = 115/322 (35%), Gaps = 64/322 (19%)

Query 8 FSRTLNDVDP--KEHIKGETYEEITRFNQVYFTQEANFG---SCNSKCEDYAAPRHNFKKE 62  
 SR DP +H++G+TY +TR Q + E N SC + C DY R +

Sbjct 272 SSRLYWRCDPGKNKHVEGQTYGRVTRLLQGFVENEVNLNTEQSCMNSCGDYHDTRSSGCY 331

Query 63 D--NRYKFPQRQCTGTIYNCIGEKITEKEPVIRYQIKKPESPEKRYYYVELPVNTDKK 120  
 + Q C G +YNC + + + S +RY Y+ +

Sbjct 332 KPEEEFCGQQPACKGRLYNCNTIESDIS-----VCPSSNASSARRYEYISFKDD----- 380

Query 121 KYQYAIIEGSNYTYRYVYGNKEHSDHTTVNFDTWIRG-FVRCDICRCLCDESKDSESIRS 179  
 GN + +W F RC C CLCDE + S R

Sbjct 381 -----GNSPDCESQVRKPSSWSSWIFWRCHYCFCLCDEP-STNSDRY 421

Query 180 FSLNAVESDTKDNKVVIGVQLALKDKIFYFKIRQSPLLPLGKADQRKLSWKSDDP SLS-- 237  
 F+L SD K NKV LLP G L W +

Sbjct 422 FNLRLDSLDFKQNKV-----GELLPKGAIRNSSLEWLPVEDYNVTD 462

Query 238 ---SASKDIFKLDVNKRSIHIGSATS NLSDFVVTGVKFAEIDGNLALGVKLT KFDVMSGK 294  
 D L ++ R++ + + N +D VVTG +F +L L V + F+ +G+

Sbjct 463 VDVRDGYDYHTLSMDSRAMDVDEISVNSTDQVVTGFRFRVFKQHLNLEVL FSSFNSTGR 522

Query 295 LMND--NNQWIYNSLSKQKLNN 314  
 L+ + W+ N S + +

Sbjct 523 LIEPQTKSFWLGNQNSHLEGHR 544

>  [gb|ACE75299.1](#) conserved hypothetical protein [Glyptapanteles indiensis]  
 Length=643

Score = 306 bits (783), Expect = 4e-81, Method: Composition-based stats.  
 Identities = 85/415 (20%), Positives = 147/415 (35%), Gaps = 79/415 (19%)

Query 11 TLDNVDPKEHIKGETYEEITRFNQVYFTQE-----ANFGSCNSKCEDYAAPRHNFKED-- 63  
 L N DP +I+GET+ E Q E + C +C+ R D

Sbjct 216 NLLNCDPPNYIRGETFSEFLGLFQGVIIINELQTD SIDASQCQGECDAVDYSRLVRCYDFN 275

Query 64 ----NRYKFPQRQCTGTIYNCIGEKITEKEPVIRYQIKKPESPEKRYYYVELPVNTDK 119  
 + C G + C I S +R+ +

Sbjct 276 AKNRTITHCHTKPCNGLLTACDE-----IGA IKTCEMYENSSRRFLWAHHIDEDSS 326

Query 120 KKYQYAIIEGSNYTYRYVYGNKEHSDHTTVNFD-TWIRGFVRCDICRCLCDESK-DSESI 177  
 V FD W RC +C C+C E + +S ++

Sbjct 327 HL-----ECPGRVVKFDNAWENDISRCSVCVCICVEQEGNSTAM 365

Query 178 RSFSLNAVESDTKDNKVVIGVQLALKDKIFYFKIRQSPLLPLGKADQRKLSWKSDDP--- 234  
 R+ SL +D N V+ GV+ A KD++F+ +I Q L G+ WK

Sbjct 366 RTISLIPQLADIHRNMVMTGVRFAEKDRMFHLQIEQGELGSFGEIVPGTAEWKELGDFQY 425

Query 235 -----SLSSAS-----KDIFKLDVNKRSIHIGSATS NLSDFVVTGVKFAE--ID 276  
 D + +++R+I++ +N V+ GV+F +D

Sbjct 426 DSAGEGSFSIKKGEKFKLTFVDFSFVALDQRTINLDEL FAND-GQVLIGVRFIYNGMD 484

Query 277 GNLALGVKLT KFDVMSGKLMNDNN---QWIYNSLSKQKLNNGGVA-----NRPIKF 324  
 L VK D+ +G+L N N +WI + ++++ N N P+K

Sbjct 485 DAFELQVKSVPVDIRTGELANGNPSDVEWIGSENAQKRSENYDGP RR MFEIGETNEPLKT 544

Query 325 TDNHASEKLDLGLVEFRQSDLKDDVQGSTVFPIDLR SIVSTG--TALIGVGLQFR 377  
 + + + + R ++ +DD+ Q TVP++DL+ + + L G+ + R

Sbjct 545 REWNHPLSVPNQRLMIRATNYEDDLHQHTVPYLDLQPVTYSTAKIPLSGLEI IHR 599

>  [ref|XP\\_001605051.1](#)  PREDICTED: similar to GA15301-PA [Nasonia vitripennis]  
 Length=592

[GENE ID: 100121438 LOC100121438](#) | similar to GA15301-PA [Nasonia vitripennis]

Score = 296 bits (759), Expect = 2e-78, Method: Composition-based stats.  
 Identities = 92/379 (24%), Positives = 149/379 (39%), Gaps = 58/379 (15%)

Query 31 RFNQVYFTQEANFGS---CNSKCEDYAA-PRHNFKEDNRYKFPQRQCTGTIYNCIGEKIT 86  
 + Q Y E + S C+ C ++ + DN+ QR C G ++NC E



Sbjct 243 QVFQNYIVNEVDLSSEKSCSKDCPHFSGGSQVQGCDFDNKICAKQRTCEGKLWNCYEESK- 301

Query 87 EKEPVIRYQIKKPES-PESDKRYYYVELPVNTDKKKYQYAIIEGSNYTYRYVYGNKEHSD 145  
I P S ++ RY Y+++ RY ++

Sbjct 302 -----IIVCPASKENNNIRYDYIDI-----KKKRYGEEKSDNCK 335

Query 146 HTTVNFDTWIRGFVRCDCICRCLCDESKDSEIERSFSLNAVESDTKDNKVVIGVQLALKDK 205  
+ V TW+R +C C C+C E ++ R SL V SD N VV G++ LK+

Sbjct 336 NEVVEAKTWLRLPYKCSNMCIC-EVSSPKTDRIYISLRPVISDAHLNYVVTGMKFELKNG 394

Query 206 IFYFKIRQSPLPLGKADQ-----RKLSWKSDDPSSLSSA-----SKDIFKLDVNKRSIH 254  
I + +I+QS LL G + + WK D + KD + L R++

Sbjct 395 IHIRIKQSKLLLANGLIENAVSELPKSEQWKKIDDYITINDKDIFEGKDYMLSWQNRITMC 454

Query 255 IGSATSNLSDFVVTGVKFAEIDGN----LALGVKLTKFDVMSGKLMNDNNQWIYNSLSKQ 310  
+ S V+TG++F N L L V+LT ++ +G+L + N+ W N L +

Sbjct 455 LDELDLNLKSDVLTGLRFKLESVNDQTYLKLEVRTPYNTTGRSLDKNSYWYNSGLQQN 514

Query 311 KLNNGGVANRPIKFTDNHASEKLDLGLVEFRQSDLKDDVQGQSTVFPIDLRSI-VSTGTAL 369  
K + + +F ++L+ D GQSTVP ++ + L

Sbjct 515 DRTEL-----KLDSSVTANPQLDSYFKFT-TNLEIDAGQSTVPVHVEHVELETKVSVPL 566

Query 370 IGVGLQFRTRDTSGGFIAP 388  
G GL +D S + A

Sbjct 567 SGAGLF-INKDLSFKWKAF 584

>  [ref|XP\\_967785.2](#)  PREDICTED: similar to conserved hypothetical protein [Tribolium castaneum]  
Length=519

[GENE ID: 656143 LOC656143](#) | similar to CG2206-PA, isoform A  
[Tribolium castaneum]

Score = 275 bits (703), Expect = 8e-72, Method: Composition-based stats.  
Identities = 73/249 (29%), Positives = 116/249 (46%), Gaps = 14/249 (5%)

Query 156 RGFVRCDCICRCLCDESKDSEIERSFSLNAVESDTKDNKVVIGVQLALKDKIFYFKIRQSP 215  
C C CLC+E + S S R +L +++ DN+VV G++ ++I + I++

Sbjct 90 YRNSYCPYCFCLCEEGQVSYSERYVNLRTKANISDNRVVTGLRFIKHNQIVHLHIQEGK 149

Query 216 LLPLGKADQRKLSWKSDDPSSLSSASK-----DIFKLDVNKRSIHIGSATSNLSDFVVTGV 270  
LL G D + + W D D L +RS+ + + VV GV

Sbjct 150 LLEKGYVDPKTVQWVPPDNYKIDDRNIYEEEDYHTLSWEERSLELTEIVAE-EGSVVIGV 208

Query 271 KFAEIDGNLALGVKLTKFDVMSGKLMNDNNQW--IYNSLSKQKLN---NGGVANRPIKFT 325  
+F + G + L V T FD +GKL DN W N+++ +N + PI

Sbjct 209 RFKKTLLGGVKLEVLTTTFDFDTGKL-EDNTTWNIFKNTITPNLINQEIKLDSPDIPI-HK 266

Query 326 DNHASEKLDLGLVEFRQSDLKDDVQGQSTVFPIDLRISIVST-GTALIGVGLQFRTRDTSGG 384  
+ + + + + F +D D GQ+TVPF D + + ST T L G+GL + R SGG

Sbjct 267 NLASIDFSENTYINFNTDYDKDAGQTTVPFFDAQPVYSTAPTPLSGIGLFHKGRKGGSGG 326

Query 385 FIAPVVVTH 393  
FI P ++T+

Sbjct 327 FITPKILTY 335

>  [ref|XP\\_001599112.1](#)  PREDICTED: similar to CG31664-PA [Nasonia vitripennis]  
Length=530

[GENE ID: 100113795 LOC100113795](#) | similar to CG31664-PA [Nasonia vitripennis]

Score = 241 bits (615), Expect = 1e-61, Method: Composition-based stats.  
Identities = 69/330 (20%), Positives = 140/330 (42%), Gaps = 59/330 (17%)

Query 86 TEKEPVIRYQIKKPESPEESDKRYYYVELPVNTDKKKYQYAIIEGSNYTYRYVYGNKEHSD 145  
K+PV + E+ + R++Y+ + + Y +Y ++ ++

Sbjct 231 ETKDPVRGWVQYCENKNKNSRHFYIHIF-----WIYLRLYLHRHETN 273

Query 146 HTTVNFDTWIRGFVRCDCICRCLCDESKDSEIERSFSLNAVESDTKDNKVVIGVQLALKDK 205  
+V C C++ D + R F+L V SD +NK+V GV++

Sbjct 274 LPSV-----FEYCTCEDPAD-DIDRHFNLRPVTSDVANNKIVTGVKIVKDQN 319

Query 206 IFYFKIRQSPLPLPLGKADQRKLSWKSDPSL-----SSASKDIFKLDVNKRSIHIGSAT- 259  
 +F+ +I+Q L G + ++WK + D + ++ +++ +

Sbjct 320 LFHIQIKQGEL-SNGFVNTSSIAWKPLEKYSPLDIGYERGVDFYTVESRSKTVCLDDLDA 378

Query 260 ---SNLSDFVVTGVKFAEIDGNLALGVKLTDFVMSGKLMNDNNQWIYNSLSKQKLNNGG 316  
 +N S++++TG++FA L L ++LT +D +G L+ +N+ WI N K +NG

Sbjct 379 NKSANKSNYLLTGLRFAV-GPYLKLEIQLTYPDPETGYLIAENSTWISNINKPAKYSNGP 437

Query 317 VANRPIKFTDNHASEKLDLGLVEFRQSDLKDDVGGQSTVPPFIDLRSIVSTGT-ALIGVGLQ 375  
 ++ + + + + +S+ D GQ+TVP ID++ I + L G GL

Sbjct 438 FDWMDAEYDNYIIT----NRCIRISRSEDSLDFGQATVPLIDIQEITTDPIPLSGAGLY 493

Query 376 FRTRD-----TSGGFIAPVVVTH 393  
 ++++ GG+ + TH

Sbjct 494 YKSKQLYSHNDVKYELLRGGYFGLRFLTH 523

>  [ref|XP\\_001605439.1](#)  PREDICTED: similar to ENSANGP00000010019 [Nasonia vitripennis]  
 Length=585

[GENE ID: 100121830 LOC100121830](#) | similar to ENSANGP00000010019  
 [Nasonia vitripennis]

Score = 229 bits (584), Expect = 4e-58, Method: Composition-based stats.  
 Identities = 74/278 (26%), Positives = 127/278 (45%), Gaps = 38/278 (13%)

Query 118 DKKKYQYAIIEGSNYTYRYVYGNKEHSDHTTVNFDTWIRGFVRCIDICRCLCDESKDSESI 177  
 +KK +Y + G+ Y + G++ + + ++ F ++C C C+E +

Sbjct 296 SEKKIEYIELLGTKKIYGF-KGSECPKVEQLRGSSFAAQFRAVELCFCTCEEDPAASDD 354

Query 178 RSFSLNAVESDTKDNKVVIGVQLALKDKIFYFKIRQSPLPLGKADQRKLSW---KSDDP 234  
 R FSL V S+ NKV+ GV++ L ++ F+++Q L+ G QR ++W + DP

Sbjct 355 RYFSLKPVTSNVVKNKVLVTGVRIVLMNRTVQFQVQQGRLVENGKKAQRSVNWGRLQPLDP 414

Query 235 SLSS--ASKDIFKLDVNKRSIHIGSATSNLSDFVVTGVKFAEIDGNLALGVKLTDFVMS 292  
 S A KD ++ + R+++I S + +D +TG+KF + +L L ++ T D +

Sbjct 415 LDRSFVAGKDYHRITYDARTVNIDSLEA-PADCALTGLKFEKEGSSSLKLAMQYTPIDFAN 473

Query 293 GKLMNDNNQWIYNSLSKQKLNNGGVANRPIKFTDNHASEKLDLGLVEFRQSDLKDDVGGQS 352  
 GKL+ + WI + + + S L+ D+G S

Sbjct 474 GKLIASGSTWISSPVGSSR-----DSSLES DLGGS 503

Query 353 TVPFI DLRSIVSTG-TALIGVGLQFRTRDTSGGFIAPV 389  
 VPFID + I ST L G GL ++ S GFI

Sbjct 504 VVPFIDSQPITSTPAVLLSGAGLVYKGRKSSGFITMK 541

>  [gb|ACZ28354.1](#) hypothetical protein [Simulium nigrimanum]  
 Length=291

Score = 228 bits (581), Expect = 1e-57, Method: Composition-based stats.  
 Identities = 65/279 (23%), Positives = 116/279 (41%), Gaps = 16/279 (5%)

Query 126 IIEGSNYTYRYVYGNKEHSDHTTVNFDTWIRGFVRCIDICRCLCDESKDSESI RSFSLNAV 185  
 + N ++V + +TW+ CD C C+CD+ + L

Sbjct 1 LCIQQNPQKKFKVYQVPDEKCHQLVLTWLYDLRNCDFCSCICDKDDEEN---YVYLGPS 57

Query 186 ESDTKDNKVVIGVQLALKDKIFYFKIRQSPLPLGKADQRKLSWKSDPSLSSASKDIFK 245  
 + T ++VV GV+L L++ + Y++++ G D L W+ +FK

Sbjct 58 KV-TDPDRVVTGVRLVLENGVLYWQLQTGKPRTFGFIDSETLEWQPLPKVSDKKDVRLFK 116

Query 246 LDVNKRSIHIGSATSNLSDFVVTGVKFAEIDG---NLALGVKLTDFVMSGKLMNDNNQW 302  
 +N++ I +V+TG++F + + L + + ++M G+L ND N +

Sbjct 117 -KINRKQSVILRNLEVPVYVLTGIQFVKSSNPPDSFDLNLFGRQIELMEGRFLFNDTNP 175

Query 303 -----IYNSLSKQKLNNGGVANRPIKFTDNHASEKLDLGLVEFRQSDLKDDVGGQSTV 357  
 +++ + + N+ K T V F S++K D Q VPF

Sbjct 176 GPEKALFDRYRAENRSALINVNKEEKITVTAKDNHTV--YVVFHGSNMKTDFSQYLVV 233

Query 358 DLRSIVST-GTALIGVGLQFRTRDTSGGFIAPVVVTHPT 395

D+R++ + L GVGL RT D GG IAP ++  
Sbjct 234 DIRNVTPSIPMPLKGVGLYHRTNDDYGGLIAPRLIAINP 272

> [gb|ACH56924.1](#) hypothetical protein [Simulium vittatum]  
Length=389

Score = 224 bits (570), Expect = 2e-56, Method: Composition-based stats.  
Identities = 65/242 (26%), Positives = 106/242 (43%), Gaps = 19/242 (7%)

Query 167 LCDESKDSESIRSF-----SLNAVESDTKDNKVVIGVQLALKDKIFYFKIRQSPLLPL 219  
+CD+ + E + F SL ESD KD KV++G+QL KD + YFKI+Q+PLLP  
Sbjct 140 VCDQGRSGEHYKFKNSLPMVSLKPQESDIKDGKVIIVGLQLTTKDDVLYFKIKQAPLLPH 199

Query 220 GKADQRKLSWKSDPSLSS-ASKDIFKLDVNRKSIHIGSATSNLSDFFVVTGVKFAEIDGN 278  
++ SW + LS K++ ++ + + T + V+TG+ F N  
Sbjct 200 FHVNESASSWMDIEYMLSRPDDKNLTVEPYHWKLMKELTV-PENTVLTGIGFGYDSKN 258

Query 279 -LALGVKLTKF-DVMSGKLMNDNNQWIYNSLSKQKLNNGGVAN-RPIKFTDNHASEKLDL 335  
L + +K T + SG+L + W+ + + + ++  
Sbjct 259 QLDIQLKYTPVLNASSGELDVLASGWAERHDAHRTKEFDNKVKVSTSCELDSFPDMMNG 318

Query 336 GLVEFRQSDLKDDVQGSTVFPFIDLRSIVS-TGTALIGVGLQFRTRDTSGGFIAPVVVTHP 394  
+ L V +PFID + +V AL G G+ + D GGF+APV +T  
Sbjct 319 QCL-----LMKKVSNDIIPFIDTQELVLPKPMALSGAGITHKGDNCGGFLAPVALTLS 372

Query 395 TY 396  
Y  
Sbjct 373 DY 374

> [gb|ACZ28153.1](#) hypothetical protein [Simulium nigriamanum]  
Length=296

Score = 215 bits (547), Expect = 7e-54, Method: Composition-based stats.  
Identities = 63/281 (22%), Positives = 115/281 (40%), Gaps = 16/281 (5%)

Query 124 YAIIEGSNYTYRYVYGNKEHSDHTTVNFDTWIRGFVRCDCICRCLCDESKDSESIRSFSLN 183  
+ N ++V + +TW+ CD C C+CD+ + L  
Sbjct 22 NTLCIQQNPQKKFKYQVPDEKCHQLVLTWLYDLRNCDFCSCICDKDDEEN---YVYLG 78

Query 184 AVESDTKDNKVVIGVQLALKDKIFYFKIRQSPLLPLGKADQRKLSWKSDPSLSSASKDI 243  
+ T ++VV GV+L L++ + Y++++ G D L W+ +  
Sbjct 79 PSKV-TDPDRVVAGVRLVLENGVLYWQLQTGKPRTFGFIDSETLEWQPLPKVTDKKDARL 137

Query 244 FKLDVNRKSIHIGSATSNLSDFFVVTGVKFAEIDG---NLALGVKLTKFDVMSGKLMNDNN 300  
FK +N++ I +V+TG++F + + L + + ++M G+L ND N  
Sbjct 138 FK-KINRKQSVILRNLEVPVYVLTGTIQTGVKSSNPPDSFDLNLFRQIELMEGRLFNDTN 196

Query 301 QW-----IYNSLSKQKLNNGGVANRPIKFTDNHASEKLDLGLVEFRQSDLKDDVQGSTVP 355  
++ +++ + + N+ K T V F S++K D Q VP  
Sbjct 197 RFGPEKALFDRYRAENRSALVNVNKEEKITVTAKDNHTV--YVVFHGSNMKTDIFSQYLVP 254

Query 356 FIDLRISIVST-GTALIGVGLQFRTRDTSGGFIAPVVVTHPT 395  
F D+R++ + L GVGL RT D GG I ++  
Sbjct 255 FFDIRNVTPSIPMPLKGVGLYHRTNDDYGGLIRHGLIGINP 295

> [gb|ACH56909.1](#) hypothetical protein [Simulium vittatum]  
Length=313

Score = 214 bits (546), Expect = 1e-53, Method: Composition-based stats.  
Identities = 61/282 (21%), Positives = 110/282 (39%), Gaps = 17/282 (6%)

Query 124 YAIIEGSNYTYRYVYGNKEHSDHTTVNFDTWIRGFVRCDCICRCLCDESKDSESIRSFSLN 183  
++ ++ ++V K + W+ F C+ C C+CD+ L  
Sbjct 25 NSLCMENDLKEKFKYTKPKDKCHQLPLTNWLYDFRNCYCSICDKDDQEN---FVYLG 81

Query 184 AVESDTKDNKVVIGVQLALKDKIFYFKIRQSPLLPLGKADQRKLSWKSDPSLSSASKDI 243  
A++ + VV GV+L + + + +++++ G D L+W+ P +  
Sbjct 82 AIQVANLGH-VVTGVRVLMANNVLFWQLQTGKPRSFGFIDADTLAWQPL-PKIDRKKDAK 139

```

Query 244  FKLDVNRKRSIHIGSATSNLSDFVVTGVKFF--AEIDGN--LALGVKLTkFDVMSGKLMNDN 299
          VNK+  I      + +V+TGv+F  ++ N  + +      D+M GKL N++
Sbjct 140  LLHRVNKKQSFIMRNLEVPAPYVLTGVQFFARSLNQNAAYDMNLYGRPIDLMEGKLYNES 199

Query 300  NQWI-----YNSLSKQKLNNGGVANRPIKFTDNHASEKLDLGLVEFRQSDLKDDVGGQSTV 354
          Q+    ++          N+  T      +      S + D Q V
Sbjct 200  RQFTPNKEQFDPYQTNTRLALVNNKEEDTTIPRKDNYTVNVFL--GHSSITGDFSQYLV 257

Query 355  PFIDLRsIVST-GTALIGVGLQFRTRDTSGGFIAPVVVTHPT 395
          PF D R++ S+  L GVGL RT D G IAP ++
Sbjct 258  PFFDTRNVTSSVPMPLKGVGLFHRtNDFYAGLIAPRLIALNP 299

```

```

>  gb|ACH56925.1 hypothetical protein [Simulium vittatum]
Length=221

```

```

Score = 209 bits (533), Expect = 3e-52, Method: Composition-based stats.
Identities = 52/214 (24%), Positives = 94/214 (43%), Gaps = 12/214 (5%)

```

```

Query 187  SDTKDNKVVIGVQLALKDKIFyFKIRQSPllPLGKADQRKLSWKSDDPSLSSASKDIFKL 246
          SD + KV++G+QL KD + FKI ++PLLP + + WK + + S+ + +
Sbjct 1    SDIANGKVIvGLQLLAKDGVLTfKILEAPllPHFHVNASEKKWKELE-YIRSSPDNKTVV 59

Query 247  DVNKRSIHIGSATSNLSDFVVTGVKFAEIDGN-LALGVKLTkF-DVMSGKLMNDNNQWIY 304
          + + + + T + V+TG+ F N L + +K T + +G+L + W+
Sbjct 60  EPHHWKlMMKELTVP-ENTVLTGIGFRYDGKNQLDIQLKYTPVLNASTGELDVLASGWMt 118

Query 305  NSLSKQKLNNGG-VANRPIKFTDNHASEKLDLGLVEFRQSDLKDDVGGQSTVPFIDLRsIV 363
          Q+          P N + ++ + L V +PFI+ + +V
Sbjct 119  ERHDAQRTKEFDKNVQIPtSCEVNSFPDMNGQCL-----LMKKVSNDIIPFIETQEVV 172

Query 364  S-TGTALIGVGLQFRTRDTSGGFIAPVVVTHPTy 396
          AL G G+ + D GG++APV +T Y
Sbjct 173  PEPMMALSGAGITHKGHDNCGGYLAPVALtLSDY 206

```

```

>  gb|ACZ28152.1 hypothetical conserved protein [Simulium nigrimanum]
Length=293

```

```

Score = 204 bits (520), Expect = 1e-50, Method: Composition-based stats.
Identities = 58/249 (23%), Positives = 104/249 (41%), Gaps = 16/249 (6%)

```

```

Query 156  RGFVRCDICRCLCDESKDSEsIRSFSLNAVESDTKDNKVVIGVQLALKDKIFyFKIRQSP 215
          + C+CD+ + L + T ++VV GV+L L++ + Y++++
Sbjct 45  YHLAYYHLdSCICDKDDEEN---YVYLGPskV-TDPDRVVTGVRLVLENGVLYWQLQTKG 100

Query 216  LLPLGKADQRKLSWKSDDPSLSSASKDIFKLdVNKRSIHIGSATSNLSDFVVTGVKFAEI 275
          G D L W+ +FK +N++ I +V+TG++F +
Sbjct 101  PRTFGFIDSETLEWQPLPKVTDKKDARLFK-KINRKQSVILRNLEVPVpYVLTGIQFVKS 159

Query 276  DG---NLALGVKLTkFDVMSGKLMNDNNQW-----IYNSLSKQKLNNGGVANRPIKFTDN 327
          + L + + ++M G+L ND N++ +++ + N+ K T
Sbjct 160  SNPPDSFDLNLfGRQIElMEGRlFNDtNRFGPEKALFDryRAENRLALVNVNKEEKItVT 219

Query 328  HASEKLDLGLVEFRQSDLKDDVGGQSTVPFIDLRsIVST-GTALIGVGLQFRTRDTSGGFI 386
          V F S++K D Q VPF D+R++ + L GVGL RT D GG I
Sbjct 220  AKDNHTV--YVVFghSNMKTDFsQYLVFFDIRNVtPSIPMPLKGVGLYHRTNDDYGLI 277

Query 387  APVVVTHPT 395
          AP ++
Sbjct 278  APRLIAINP 286

```

```

>  gb|AAU06548.1 unknown salivary protein [Culicoides sonorensis]
Length=225

```

```

Score = 202 bits (514), Expect = 5e-50, Method: Composition-based stats.
Identities = 115/210 (54%), Positives = 140/210 (66%), Gaps = 20/210 (9%)

```

```

Query 5    SLGFSRtLDNVDPKEHIKGETyEEItRFNQVYFTQEANFGSCNSKCEDYAAPRHNFKEDN 64

```

Sbjct 35 S G SR L N DPK H++G+TYEEITRFNQVYFTQEA FGSC+S CEDYAAPRHNFKED+ 94  
 SAGESRELYNTDPKAHVGRDITYEEITRFNQVYFTQEAATFGSCDSVCEHYAAPRHNFKEDD

Query 65 RYKFPQRQCTGTIYNICIGEKITEKEPEVIRYQIKKPESPESDKRYYYVELPVNTDKKKYQY 124  
 +YKFPQRQCTGTI++C E E Y +++P+S SD RYYY + +

Sbjct 95 QYKFPQRQCTGTIHSCTSEYSPE-----YHVRQPKSETSDARYYYFSKQKGFNGEL--- 145

Query 125 AIIEGSNYTYRYVYGNKEHSDHTTVNFDTWIRGFVRCDICRCLCDESKDSEISRSFSLNA 184  
 Y+YGNK+ ++ F W R FVRCDIC+CLCDE +D +S+RSFSLN

Sbjct 146 -----YIYGNKKEPEYRFEIFKGWERVFVRCDICRCLCDEPEDKKSRSFSLNT 194

Query 185 VESDTKDNKVVIGVQLALKDKIFYFKIRQS 214  
 + SD DN VV G LA KDK+F +KI S

Sbjct 195 MTSKSDNMVVTGSPLAWKDKVFSWKIHIS 224

>  [ref|XP\\_002082764.1](#)  GD11752 [Drosophila simulans]  
[gb|EDX08349.1](#)  GD11752 [Drosophila simulans]  
 Length=163

[GENE ID: 6735854 Dsim\GD11752](#) | GD11752 gene product from transcript GD11752-RA [Drosophila simulans] (10 or fewer PubMed links)

Score = 200 bits (509), Expect = 2e-49, Method: Composition-based stats.  
 Identities = 41/153 (26%), Positives = 73/153 (47%), Gaps = 7/153 (4%)

Query 248 VNKRSIHIGSATSNLSDFFVVTGVKFAEIDGNLALGVKLTDFVMSGKLMND--NNQWIYN 305  
 ++ R++ + + +D VVTG +F +L L V+ + F+ +G+L+ + W+ N

Sbjct 1 MDSRALDLDEISVKSTQVVTGFRFRVFKQHLNLEVRVSSFNSTGRLEPQTKSFWLGN 60

Query 306 SLSK----QKLNNGGVANRPIKFTDNHASEKLDLGLVEFRQSDLKDDVQGSTVPFIDLRS 361  
 S +K ++ P + +EF S D Q+TVPFID++

Sbjct 61 QNSHLEGHRKRLILKESDLPTASELPLSLQNNQFLEFGSSSQLKDAQNTVPFIDVQE 120

Query 362 IVSTG-TALIGVGLQFRTRDTSGGFIAPVVVTH 393  
 +V L G+G+ ++ R GGF AP V+T+

Sbjct 121 VVPRPAMPLAGLGIYYKGRPGYGGFFAPKVMY 153

>  [gb|ACZ28340.1](#) hypothetical conserved protein [Simulium nigrimanum]  
 Length=346

Score = 196 bits (498), Expect = 4e-48, Method: Composition-based stats.  
 Identities = 51/246 (20%), Positives = 105/246 (42%), Gaps = 24/246 (9%)

Query 167 LCD-ESKDESISRSF-----SLNAVESDTKDNKVVIGVQLALKDKIFYFKIRQSPLLP 218  
 +C+ +S++ ++ + F SL ESD K+ KV++G+QL + + F+I Q+PL+

Sbjct 94 VCNPQSRNPDTFKKFEKKTPLVSLTPQESDIKNGKVIIVGLQLTIVFDVLTQIMQAPLIS 153

Query 219 LGKADQRKLSWKSDDPSLSSASKDIFKLDVNKRSIHIGSATSNLSDFFVVTGVKFAEIDGN 278  
 + + W + S + + ++ + + T + V+TG+ F N

Sbjct 154 NFYVNATQSEWIKT-YNQHSLANNNTVVEPYHWKLMKELTV-PENTVLTGIGFRYDSKN 211

Query 279 -LALGVKLTKF-DVMSGKLMNDNNQWIYNSLSKQKLNNGGVANR-PIKFTDNHASEKLDL 335  
 L + +K T + +G+L + W+ Q + + + +

Sbjct 212 QLDIQLKYTPVLNATTGELDVLAGWMAERHDAQMTKEFSTKVKASASCEVDPPDPMPNG 271

Query 336 GLVEFRQSDLKDDVQG----STVPFIDLRSIVS-TGTALIGVGLQFRTRDTSGGFIAPVV 390  
 + L ++G + +P+++ + +V AL G G+ + D GGF+APV

Sbjct 272 QCL-----LMKNLNGHGHQANWIPYVETQOVVPPQMMALSGAGITHKGHDDCGGFLAPVT 325

Query 391 VTHPTY 396  
 +T Y

Sbjct 326 LTLSDY 331

>  [gb|AAU06547.1](#) unknown salivary protein [Culicoides sonorensis]  
 Length=218

Score = 195 bits (496), Expect = 6e-48, Method: Composition-based stats.

Identities = 111/203 (54%), Positives = 134/203 (66%), Gaps = 20/203 (9%)

Query 5 SLGFSRSLDNDVDPKEHIKGETYEEITRFNQVYFTQEANFGSCNSKCEDYAAPRHNFKEDN 64  
 S G SR L N DPK H++G+TYEEITRFNQVYFTQEA FGSC+S CEDYAAPRHNFKED+

Sbjct 35 SAGESRELYNTDPKAHVRGDTYEEITRFNQVYFTQEATFGSCDSVCEGYAAPRHNFKEDD 94

Query 65 RYKFPQRQCTGTIYNCIGEKITEKEPVIRYQIKKPESPEKRYYYVELPVNTDKKKYQY 124  
 +YK PQRQCTGTI++C E E Y +++P+S SD RYYY + +

Sbjct 95 QYKLPQRQCTGTIHSCTSEYSPE-----YHVRQPKSETSDARYYYFSKQKGFNGEL--- 145

Query 125 AIIEGSNYTYRYVYGNKEHSDHTTVNFDTWIRGFVRCDICRCLCDESKDSESIRSFSLNA 184  
 Y+YGNK+ ++ F W R FVRCDIC+CLCDE +D +S+RSFSLN

Sbjct 146 -----YIYGNKKEPEYRFEIFKQWVERVFRCDICKCLCDEPEDKKSRSFSLNT 194

Query 185 VESDTKDNKVVIGVQLALKDKIF 207  
 + SD DN VV GV LA K IF

Sbjct 195 MTSKSDNMVVTGVHLAWKISIF 217

>  [gb|EFA12874.1](#) hypothetical protein TcasGA2\_TC010726 [Tribolium castaneum]  
 Length=304

Score = 193 bits (491), Expect = 3e-47, Method: Composition-based stats.  
 Identities = 47/191 (24%), Positives = 86/191 (45%), Gaps = 15/191 (7%)

Query 194 VVIGVQLALKDKIFYFKIRQSPLLPLGKADQRKLSWKSDDPS-----LSSASKDIFKLDV 248  
 VV G++ ++I + ++++ LL G + + W + +D +

Sbjct 44 VVTGLRFIKHNRIVHLQVQEGKLLKGNINPTTVQWVPPEDYKITDRDIYKQDYHTISW 103

Query 249 NKRSIHIGSATSNSLDFVVTGVKFAEIDGNLALGVKLTKFVMSGKL-MNDNNQW----- 302  
 +R+I + + + VVTGV+F G+L L V T FD +GKL N ++ W

Sbjct 104 EERTIELTKVIAK-AGSVVTGVRFKRFTFGLNLQVLTAFDFNTGKLEKNSDSWDGIFES 162

Query 303 --IYNSLSKQKLNNGGVANRPIKFTDNHASEKLDLGLVEFRQSDLKDDVGQSTVPFIDLR 360  
 +N K +L + T+ ++ + +EF +D + D GQ+T+PF D +

Sbjct 163 APYFNIRHKFRLKVNLPDVPVRTNLDFTDFSENMYIEFANTDYRKDAGQTTIPFFDAQ 222

Query 361 SIVS-TGTALI 370  
 ++ S T T L

Sbjct 223 AVNSTTPTPLS 233

>  [ref|XP\\_002041740.1](#)  GM16585 [Drosophila sechellia]  
[gb|EDW45556.1](#)  GM16585 [Drosophila sechellia]  
 Length=248

[GENE ID: 6617415 Dsec\GM16585](#) | GM16585 gene product from transcript GM16585-RA  
 [Drosophila sechellia] (10 or fewer PubMed links)

Score = 187 bits (474), Expect = 3e-45, Method: Composition-based stats.  
 Identities = 44/184 (23%), Positives = 71/184 (38%), Gaps = 36/184 (19%)

Query 3 LPSLG-----FSRSLDNDVDPKEHIKGETYEEITRFNQVYFTQEANFGS---CNSKCEDYA 54  
 LP + R++ DP++H G TYEE+ R Q Y E + S CN C Y

Sbjct 91 LPKIKVLMSQAERSVWRCDPQKHQSGITYEEVNRLQGYVENEVDLNSDGACNHDCGYYN 150

Query 55 APRHNFKEDNRYKFPQRQCTGTIYNCIGEKITEKEPVIRYQIKKPESPEKRYYYVELP 114  
 + ++ DN++ Q +CTG +++C V S +RY +++

Sbjct 151 SAKNEGCFDNKFCSEQPKCTGGVHDCR-----FVESSMQICQAEKNSSRRYEFIK-- 200

Query 115 VNTDKKKYQYAIIEGNSYTYRYVYGNKEHSDHTTVNFDTWIRGFVR-CDICRCLCDESKD 173  
 Y V+GN++ + +W R C C CLCD+

Sbjct 201 -----YESGLVHGNEKPCASWLTSAKSWNRWLFMECSYCLCLCDDQSP 243

Query 174 SESI 177  
 S +

Sbjct 244 STCV 247

>  [gb|AAU06499.1](#) unknown salivary protein [Culicoides sonorensis]



Length=157

Score = 173 bits (439), Expect = 3e-41, Method: Composition-based stats.  
Identities = 124/155 (80%), Positives = 140/155 (90%), Gaps = 0/155 (0%)

Query 244 FKLDVNRKRSIHIGSATSNLSDFVVTGVKFAEIDGNLALGVKLTkFDVMSGKLMNDNNQWI 303  
 FKLDV KR++HIGSA S L+DFVVTGVKFAE+DGNLALGVK+TKFDVMSGKL+ND NQWI  
 Sbjct 1 FKLDVKKRTVHIGSAKSLTDFVVTGVKFAEVDGNLALGVKVTkFDVMSGKLINDINQWI 60

Query 304 YNSLSKQKLNNGGVANRPIKFTDNHASEKLDLGLVEFRQSDLKDDVGGQSTVPPFIDLRsIV 363  
 +NSL QKLNN G A RPIKFTD+ A+E ++GLV+F+QSDLKDDVGGQSTVPPFID+R IV  
 Sbjct 61 FNSLXTQKLNNKGGAYRPIKFTDHRATEDNNVGLVQFKQSDLKDDVGGQSTVPPFIDVRPIV 120

Query 364 STGTALIGVGLQFRTRDTSGGFIAPVVVTHPTyTG 398  
 +TGTALIGVGLQ RTR+TSGGFI PVVVTHPTyTG  
 Sbjct 121 ATGTALIGVGLQLRTRRETSGGFIQPVVVTHPTyTG 155

>  [gb|AAU06503.1](#) unknown salivary protein [Culicoides sonorensis]  
 Length=183

Score = 171 bits (434), Expect = 1e-40, Method: Composition-based stats.  
Identities = 130/160 (81%), Positives = 147/160 (91%), Gaps = 0/160 (0%)

Query 1 NKLPSLGFsRtLDNVDPKEHIKGETyEEITRFNqVYfTQeANFGsCNSKcEDYAAPRHNF 60  
 NKLPSLGFsR LDNVDPKEHIK TYEEITRF+QVYfTQe+NFgSCNSKcEDY+APRHNF  
 Sbjct 23 NKLPSLGFsRPLDNVDPKEHIKGVTYEEITRFDQVYfTQeSNFGsCNSKcEDYSAPRHNF 82

Query 61 KEDNRYKFPQRQCTGTIYNcIGEKITEKEPVIRYQIKKPEsPESDKRyYyVELPVNTDKK 120  
 KED+RYKFPQRQCTGTIY C+GEKITE+EPVIRY++KKP+S +S++RYy + +PVN +K  
 Sbjct 83 KEDDRYKFPQRQCTGTIYcVGEKITEREPVIRYRVKKPKsSDSNERYyDISIPVNNNKT 142

Query 121 KYQYAIIEGSNyTYRYVYGNKEHSDHTTVNFDTWIRGFVR 160  
 YQYAII+G NYTYRYVYGN EHSD+ VNFDTWIRGFVR  
 Sbjct 143 IYQYAIIDGLNYTYRYVYGNNEHSDYEIVNFDTWIRGFVR 182

>  [gb|AAS87304.1](#) CG2206-like protein [Drosophila miranda]  
 Length=132

Score = 163 bits (413), Expect = 3e-38, Method: Composition-based stats.  
Identities = 38/153 (24%), Positives = 54/153 (35%), Gaps = 31/153 (20%)

Query 23 GETyEEITRFNqVYfTQeANFG---sCNSKcEDYAAPRHNFkEDNRYKFPQRQCTGTIYN 79  
 G TY+E+TR Q Y E + +C C Y + R + Y Q +C+G +Y+  
 Sbjct 3 GVTYDEVTRLLQGYIENEVDLNEETCRETCsFYQSTRSEGCYKDLyCARQPRCSGRlyD 62

Query 80 CIGEKITEKEPVIRYQIKKPEsPESDKRyYyVELPVNTDKKkYQYAIIEGSNyTYRYVYG 139  
 C V P S +RY Y+E Y G  
 Sbjct 63 CQ-----FVDSDMWVCPSPKNSTRRYEYIE-----YENGRTLG 95

Query 140 NKEHSDHTTVNFDTWIRG-FVRCDICRCLcDES 171  
 + + T D+W R C C C+CDE  
 Sbjct 96 RRANCVRGTTKVDsWwRYILWHCSyCFMcDEQ 128

>  [gb|ACZ28339.1](#) hypothetical protein [Simulium nigrimanum]  
 Length=167

Score = 145 bits (367), Expect = 5e-33, Method: Composition-based stats.  
Identities = 31/159 (19%), Positives = 63/159 (39%), Gaps = 15/159 (9%)

Query 246 LDVNRKRSIHIGSATSNLSDFVVTGVKFAEIDGN-LALGVKLTkF-DVMSGKLMNDNNQWI 303  
 ++ + + T + V+TG+ F N L + +K T + +G+L + W+  
 Sbjct 1 VEPYHwKLMMKELTVP-ENTVLTGIGFRYDSKNQLDIQLKYTPVLNATTGELDLVLAGWw 59

Query 304 YNSLSKQKLNNGGVANRPIK-FTDNHASEKLDLGLVEFRQSDLKDDVGGQ----STVPPFID 358  
 Q +P + + + + L ++G + +P+++  
 Sbjct 60 AERHDAQMTKEFSTKVKPSASCEVDPFPDMPNGQCL-----LMKNLGNGHQANWIPYVE 113

Query 359 LRSIVS-TGTALIGVGLQFRTRDTSGGFIAPVVVTHPTy 396

+ +V AL G G+ + D GGF+APV +T Y  
Sbjct 114 TQQVVPQPMMLSGAGITHKGHDDCGFLAPVTLTSLDY 152

> [gb|EFA11732.1](#) hypothetical protein TcasGA2\_TC002380 [Tribolium castaneum]  
Length=440

Score = 125 bits (314), Expect = 1e-26, Method: Composition-based stats.  
Identities = 29/105 (27%), Positives = 54/105 (51%), Gaps = 3/105 (2%)

Query 290 VMSGKLMNDNNQWIYNSLSKQKLNNGGVANRPIKFTDNHASEKLDLGLVEFRQSDLKDDV 349  
+L++D + + + ++ + PI+ + +++ ++F +D + D  
Sbjct 158 FEETQLISDLKR-LDSPPKFKENVKLESPDIPIR-KNLASTDFSKNKCIFKTNTDYQKDA 215  
Query 350 GQSTVPFIDLRSIVST-GTALIGVGLQFRTRDTSGGFIAPVVVTH 393  
GQ+T+PF D + + ST T L GVGL + SGGFIAP + T+  
Sbjct 216 GQTTIPFFDAQPVNSTIPTPLSGVGLFHKGHKSGGGFIAPKIFTY 260

> [gb|AAR20336.1](#) CG2206-like protein [Drosophila pseudoobscura]  
[gb|AAR20337.1](#) CG2206-like protein [Drosophila pseudoobscura]  
[gb|AAR20338.1](#) CG2206-like protein [Drosophila pseudoobscura]  
[gb|AAR20339.1](#) CG2206-like protein [Drosophila pseudoobscura]  
Length=104

Score = 124 bits (311), Expect = 2e-26, Method: Composition-based stats.  
Identities = 27/131 (20%), Positives = 39/131 (29%), Gaps = 30/131 (22%)

Query 33 NQVYFTQEANFG---SCNSKCEDYAAPRHNFKEDNRYKFPQRQCTGTIYNCIGEKITEKE 89  
Q Y E + +C C Y + R + Y Q +C+G +YNC  
Sbjct 1 LQGYIENEVDLNNETCRETCSEFYQSTRSEGCYKDLYCARQPRCSGRLYNCQ----- 52  
Query 90 PVIRYQIKKPESPEKDRYYVELPVNTDKKQYAIIEGSNYTYRYVYGNKEHSDHTTV 149  
V P S +RY Y+E Y G + + T  
Sbjct 53 FVDSMWWCPSPKNSTRRYEYIE-----YENGRITLQQRANCVRGTT 93  
Query 150 NFDTWIRGFVR 160  
D+W R  
Sbjct 94 KVDSWWRYLFW 104

> [gb|AAU06508.1](#) unknown salivary protein [Culicoides sonorensis]  
Length=135

Score = 119 bits (298), Expect = 7e-25, Method: Composition-based stats.  
Identities = 70/127 (55%), Positives = 85/127 (66%), Gaps = 5/127 (3%)

Query 137 VYGNKEHSDHTTVNFDTWIRGFVRCIDICRCLCDESKDSESIRSFSLNAVESDTKDNKVVI 196  
VYG+ S TV F WIRGFV C ICRC+ DE KD+ S+RSFSLN+++SDTK NKVV  
Sbjct 1 VYHGLGSKFKFTVTFKAWIRGFVMCAICRCVDEPKDNLVRSFSLNSLKSDTKKNKVVT 60  
Query 197 GVQLALKDKIFYFKIRQSPLPLGKADQRKLSWKSDDPSLSSASKDIFKLDVNKRSIHIG 256  
GVQ+ + +F KI QSPLL GK + +K SWKSD P S + FKL NKRSIHIG  
Sbjct 61 GVQIIQINNVFCLKIHQSPLLRKGKVNFKKGSWKS DSP-----SNNTFKLAFNKRSIHIG 115  
Query 257 SATSNLS 263  
++ N  
Sbjct 116 TSCVNP 122

> [gb|AAU06510.1](#) unknown salivary protein [Culicoides sonorensis]  
Length=163

Score = 107 bits (268), Expect = 2e-21, Method: Composition-based stats.  
Identities = 26/118 (22%), Positives = 52/118 (44%), Gaps = 3/118 (2%)

Query 280 ALGVKLTkFDVMSGKLMNDN--NQWIYNSLSKQKLNNGGVANRPIKFTDNHASEKLDLGL 337  
L V + ++++G W + ++ + N + + ++ L  
Sbjct 15 NLRVFGQINILNGNFPTPIVTHWNEIPKAKVIDTENLIGGVDKPNVTTGQDEVK 74

Query 338 VEFRQSDLKDDVQSTVFPFIDLRISIVSTG-TALIGVGLQFRTRDTSGGFIAPVVVTHP 394  
V+F S L D+ GQ++VP+ D + + S GVGL +RT + G++AP ++  
Sbjct 75 VKFSHSPLTDNFGQNSVPYFDTQQVTSRPKMVQAGVGLYYRTTEKYAGYLAPRLIAFN 132

>  [gb|AAU06490.1](#) unknown salivary protein [Culicoides sonorensis]  
Length=94

Score = 107 bits (266), Expect = 3e-21, Method: Composition-based stats.  
Identities = 48/86 (55%), Positives = 66/86 (76%), Gaps = 0/86 (0%)

Query 312 LNNGGVANRPIKFTDNHASEKLDLGLVEFRQSDLKDDVQSTVFPFIDLRISIVSTGTALIG 371  
+ +G +RP +TDN A+EK +GL++ QS + DDVQSTVFPFIDL+ I ST +ALIG  
Sbjct 2 ITDGKSGHRPTAYTDNVATEKTKIGLIQLSQSHMDDVQSTVFPFIDLQPITSTESALIG 61

Query 372 VGLQFRTRDTSGGFIAPVVVTHPTYT 397  
+GL +R R+ SGGFIAP ++THPT++  
Sbjct 62 LGLLYRGREFSSGGFIAPSLITHPTFS 87

>  [ref|NP\\_611782.2](#)  CG30409 [Drosophila melanogaster]  
[gb|AAF46984.2](#)  CG30409 [Drosophila melanogaster]  
Length=98

[GENE ID: 37696 CG30409](#) | CG30409 gene product from transcript CG30409-RA  
[Drosophila melanogaster] (10 or fewer PubMed links)

Score = 70.5 bits (171), Expect = 4e-10, Method: Composition-based stats.  
Identities = 15/68 (22%), Positives = 22/68 (32%), Gaps = 5/68 (7%)

Query 25 TYEEITRFNQVYFTQEANFG---SCNSKCEDYAAPRHNFKED--NRYKFPQRQCTGTIYN 79  
TY + QV+ E N SC + C R + + Q C G +Y  
Sbjct 30 TYGHVACLLQVFFVENEINLSPDQSCMNCCGGCHDTRSSGCYKAEFEFCGQQAACKGRLYK 89

Query 80 CIGEKITE 87  
C +  
Sbjct 90 CNTIESES 97
