# Supplementary material
Source: PubMed Central journal article supplement (PMC2950210)
Supplement: NIHMS231853-supplement-05.pdf [file NIHMS231853-supplement-05.pdf]

PSI blast Iteration 9 for member of a conserved secreted protein of insects

gi|208657775|gb|ACI30184.1| hypothetical c

Query ID gi|208657775|gb|ACI30184.1| hypothetical conserved secreted protein [Anopheles darlingi]  
 Molecule type amino acid  
 Query Length 126  
 Database Name nr  
 Description All non-redundant GenBank CDS translations+PDB+SwissProt+PIR+PRF excluding environmental samples from WGS projects [See details](#)  
 Program BLASTP 2.2.22+ [Citation](#)  
 Blast search databases information

**Database Description Posted Date**

[Reference](#)  
 Stephen F. Altschul, Thomas L. Madden, Alejandro A. Schäffer, Jinghui Zhang, Zheng Zhang, Webb Miller, and David J. Lipman (1997), "Gapped BLAST and PSI-BLAST: a new generation of protein database search programs", Nucleic Acids Res. 25:3389-3402.  
[Reference - composition-based statistics starting in round 2](#)  
 Alejandro A. Schäffer, L. Aravind, Thomas L. Madden, Sergei Shavirin, John L. Spouge, Yuri I. Wolf, Eugene V. Koonin, and Stephen F. Altschul (2001), "Improving the accuracy of PSI-BLAST protein database searches with composition-based statistics and other refinements", Nucleic Acids Res. 29:2994-3005.

- No new sequences were found above the 0.001 threshold

Sequences with pattern at position and E-value BETTER than threshold

| Sequences producing significant alignments:                                                                          | Score (Bits)        | E Value         |
|----------------------------------------------------------------------------------------------------------------------|---------------------|-----------------|
| <input checked="" type="checkbox"/> <a href="#">ref XP_001866470.1 </a> conserved hypothetical protein [Culex qui... | <a href="#">134</a> | 2e-30 <b>G</b>  |
| <input checked="" type="checkbox"/> <a href="#">gb AAV85037.1 </a> IP05651p [Drosophila melanogaster]                | <a href="#">127</a> | 4e-28           |
| <input checked="" type="checkbox"/> <a href="#">ref XP_001660923.1 </a> hypothetical protein AaeL_AAEL010558 [Aed... | <a href="#">123</a> | 5e-27 <b>UG</b> |
| <input checked="" type="checkbox"/> <a href="#">ref XP_001866469.1 </a> conserved hypothetical protein [Culex qui... | <a href="#">122</a> | 1e-26 <b>UG</b> |
| <input checked="" type="checkbox"/> <a href="#">gb ACU30989.1 </a> secreted protein member of chemokine-like fac...  | <a href="#">121</a> | 2e-26           |
| <input checked="" type="checkbox"/> <a href="#">gb ACI30203.1 </a> hypothetical conserved protein [Anopheles darl... | <a href="#">121</a> | 2e-26           |
| <input checked="" type="checkbox"/> <a href="#">ref XP_309156.3 </a> AGAP000964-PA [Anopheles gambiae str. PEST] ... | <a href="#">121</a> | 2e-26 <b>UG</b> |
| <input checked="" type="checkbox"/> <a href="#">gb ACI30184.1 </a> hypothetical conserved secreted protein [Anoph... | <a href="#">121</a> | 3e-26           |
| <input checked="" type="checkbox"/> <a href="#">ref XP_002040111.1 </a> GM16029 [Drosophila sechellia] >gb EDW569... | <a href="#">120</a> | 4e-26 <b>G</b>  |
| <input checked="" type="checkbox"/> <a href="#">ref NP_726341.1 </a> CG30184 [Drosophila melanogaster] >gb AAM682... | <a href="#">120</a> | 5e-26 <b>UG</b> |
| <input checked="" type="checkbox"/> <a href="#">ref XP_002082812.1 </a> GD11778 [Drosophila simulans] >gb EDX0839... | <a href="#">119</a> | 9e-26 <b>G</b>  |
| <input checked="" type="checkbox"/> <a href="#">ref XP_001978654.1 </a> GG17559 [Drosophila erecta] >gb EDV47581.... | <a href="#">117</a> | 5e-25 <b>G</b>  |
| <input checked="" type="checkbox"/> <a href="#">ref XP_002055767.1 </a> GJ19540 [Drosophila virilis] >gb EDW65968... | <a href="#">116</a> | 6e-25 <b>G</b>  |
| <input checked="" type="checkbox"/> <a href="#">ref XP_001354423.1 </a> GA13737 [Drosophila pseudoobscura pseudoo... | <a href="#">116</a> | 6e-25 <b>G</b>  |
| <input checked="" type="checkbox"/> <a href="#">ref NP_608423.1 </a> CG15449 [Drosophila melanogaster] >ref XP_00... | <a href="#">116</a> | 6e-25 <b>UG</b> |
| <input checked="" type="checkbox"/> <a href="#">ref XP_002092643.1 </a> GE14306 [Drosophila yakuba] >gb EDW92355.... | <a href="#">116</a> | 8e-25 <b>G</b>  |
| <input checked="" type="checkbox"/> <a href="#">ref XP_002071641.1 </a> GK10090 [Drosophila willistoni] >gb EDW82... | <a href="#">116</a> | 9e-25 <b>G</b>  |
| <input checked="" type="checkbox"/> <a href="#">ref XP_001991178.1 </a> GH12523 [Drosophila grimshawi] >gb EDV998... | <a href="#">116</a> | 1e-24 <b>G</b>  |
| <input checked="" type="checkbox"/> <a href="#">ref XP_002010101.1 </a> GI14877 [Drosophila mojavensis] >gb EDW07... | <a href="#">116</a> | 1e-24 <b>G</b>  |
| <input checked="" type="checkbox"/> <a href="#">ref XP_001660924.1 </a> hypothetical protein AaeL_AAEL010564 [Aed... | <a href="#">114</a> | 3e-24 <b>UG</b> |

|                                     |                                    |                                                   |                      |       |           |
|-------------------------------------|------------------------------------|---------------------------------------------------|----------------------|-------|-----------|
| <input checked="" type="checkbox"/> | <a href="#">ref XP_975314.1</a>    | PREDICTED: similar to CG15449 CG15449-PA [Tr...   | <a href="#">114</a>  | 4e-24 | <b>UG</b> |
| <input checked="" type="checkbox"/> | <a href="#">ref XP_001976431.1</a> | GG22868 [Drosophila erecta] >gb EDV56831....      | <a href="#">114</a>  | 4e-24 | <b>G</b>  |
| <input checked="" type="checkbox"/> | <a href="#">ref XP_309155.3</a>    | AGAP000963-PA [Anopheles gambiae str. PEST] ...   | <a href="#">113</a>  | 5e-24 | <b>UG</b> |
| <input checked="" type="checkbox"/> | <a href="#">ref NP_001091800.1</a> | hypothetical protein LOC778505 [Bombyx mo...      | <a href="#">110</a>  | 5e-23 | <b>UG</b> |
| <input checked="" type="checkbox"/> | <a href="#">ref XP_001361089.1</a> | GA15708 [Drosophila pseudoobscura pseudoo...      | <a href="#">106</a>  | 6e-22 | <b>G</b>  |
| <input checked="" type="checkbox"/> | <a href="#">ref XP_001966751.1</a> | GF19114 [Drosophila ananassae] >gb EDV337...      | <a href="#">106</a>  | 7e-22 | <b>G</b>  |
| <input checked="" type="checkbox"/> | <a href="#">ref XP_002018237.1</a> | GL16872 [Drosophila persimilis] >gb EDW36...      | <a href="#">105</a>  | 2e-21 | <b>G</b>  |
| <input checked="" type="checkbox"/> | <a href="#">ref XP_002055067.1</a> | GJ19171 [Drosophila virilis] >gb EDW65268...      | <a href="#">104</a>  | 2e-21 | <b>G</b>  |
| <input checked="" type="checkbox"/> | <a href="#">ref XP_002039595.1</a> | GM22643 [Drosophila sechellia] >gb EDW563...      | <a href="#">104</a>  | 4e-21 | <b>G</b>  |
| <input checked="" type="checkbox"/> | <a href="#">ref NP_572518.1</a>    | CG7267 [Drosophila melanogaster] >ref XP_002...   | <a href="#">103</a>  | 5e-21 | <b>UG</b> |
| <input checked="" type="checkbox"/> | <a href="#">ref XP_001606621.1</a> | PREDICTED: hypothetical protein [Nasonia ...      | <a href="#">102</a>  | 1e-20 | <b>UG</b> |
| <input checked="" type="checkbox"/> | <a href="#">gb ACN69164.1</a>      | hypothetical conserved secreted protein [Stomo... | <a href="#">101</a>  | 2e-20 |           |
| <input checked="" type="checkbox"/> | <a href="#">ref XP_001959837.1</a> | GF13066 [Drosophila ananassae] >gb EDV366...      | <a href="#">100</a>  | 6e-20 | <b>G</b>  |
| <input checked="" type="checkbox"/> | <a href="#">ref XP_001661199.1</a> | hypothetical protein AaeL_AAEL010956 [Aed...      | <a href="#">98.7</a> | 2e-19 | <b>UG</b> |
| <input checked="" type="checkbox"/> | <a href="#">ref XP_001845632.1</a> | conserved hypothetical protein [Culex qui...      | <a href="#">97.5</a> | 4e-19 | <b>UG</b> |
| <input checked="" type="checkbox"/> | <a href="#">ref XP_002423901.1</a> | conserved hypothetical protein [Pediculus...      | <a href="#">95.6</a> | 1e-18 | <b>G</b>  |
| <input checked="" type="checkbox"/> | <a href="#">ref XP_001119879.1</a> | PREDICTED: similar to CG15449-PA [Apis me...      | <a href="#">93.3</a> | 8e-18 | <b>UG</b> |
| <input checked="" type="checkbox"/> | <a href="#">ref XP_001655679.1</a> | hypothetical protein AaeL_AAEL002578 [Aed...      | <a href="#">92.1</a> | 1e-17 | <b>UG</b> |
| <input checked="" type="checkbox"/> | <a href="#">ref XP_001995529.1</a> | GH17713 [Drosophila grimshawi] >gb EDV951...      | <a href="#">92.1</a> | 2e-17 | <b>G</b>  |
| <input checked="" type="checkbox"/> | <a href="#">ref XP_002009616.1</a> | GI15456 [Drosophila mojavensis] >gb EDW06...      | <a href="#">91.8</a> | 2e-17 | <b>G</b>  |
| <input checked="" type="checkbox"/> | <a href="#">ref XP_001949085.1</a> | PREDICTED: similar to conserved hypotheti...      | <a href="#">91.4</a> | 3e-17 | <b>UG</b> |
| <input checked="" type="checkbox"/> | <a href="#">dbj BAH71208.1</a>     | ACYPI008397 [Acyrtosiphon pisum]                  | <a href="#">90.6</a> | 4e-17 |           |
| <input checked="" type="checkbox"/> | <a href="#">ref XP_002047342.1</a> | GJ11981 [Drosophila virilis] >gb EDW69684...      | <a href="#">90.6</a> | 4e-17 | <b>G</b>  |
| <input checked="" type="checkbox"/> | <a href="#">gb ABV44719.1</a>      | ryanodine receptor-like protein [Phlebotomus p... | <a href="#">90.2</a> | 6e-17 |           |
| <input checked="" type="checkbox"/> | <a href="#">ref XP_001984136.1</a> | GH16269 [Drosophila grimshawi] >gb EDV964...      | <a href="#">90.2</a> | 7e-17 | <b>G</b>  |
| <input checked="" type="checkbox"/> | <a href="#">ref XP_002005498.1</a> | GI20498 [Drosophila mojavensis] >gb EDW09...      | <a href="#">89.8</a> | 8e-17 | <b>G</b>  |
| <input checked="" type="checkbox"/> | <a href="#">ref XP_311473.3</a>    | AGAP010471-PA [Anopheles gambiae str. PEST] ...   | <a href="#">87.9</a> | 3e-16 | <b>UG</b> |
| <input checked="" type="checkbox"/> | <a href="#">ref XP_002008949.1</a> | GI13768 [Drosophila mojavensis] >gb EDW19...      | <a href="#">87.5</a> | 4e-16 | <b>G</b>  |
| <input checked="" type="checkbox"/> | <a href="#">ref XP_002050796.1</a> | GJ22349 [Drosophila virilis] >gb EDW61989...      | <a href="#">87.5</a> | 4e-16 | <b>G</b>  |
| <input checked="" type="checkbox"/> | <a href="#">ref XP_002009617.1</a> | GI15457 [Drosophila mojavensis] >gb EDW06...      | <a href="#">87.5</a> | 4e-16 | <b>G</b>  |
| <input checked="" type="checkbox"/> | <a href="#">ref XP_001973440.1</a> | GG16083 [Drosophila erecta] >gb EDV52466....      | <a href="#">87.5</a> | 4e-16 | <b>G</b>  |
| <input checked="" type="checkbox"/> | <a href="#">ref XP_002009021.1</a> | GI11493 [Drosophila mojavensis] >gb EDW19...      | <a href="#">87.5</a> | 4e-16 | <b>G</b>  |
| <input checked="" type="checkbox"/> | <a href="#">ref XP_001956640.1</a> | GF25311 [Drosophila ananassae] >gb EDV394...      | <a href="#">87.1</a> | 5e-16 | <b>G</b>  |
| <input checked="" type="checkbox"/> | <a href="#">ref XP_002048071.1</a> | GJ13758 [Drosophila virilis] >gb EDW70413...      | <a href="#">87.1</a> | 5e-16 | <b>G</b>  |
| <input checked="" type="checkbox"/> | <a href="#">ref NP_649184.1</a>    | CG6981, isoform A [Drosophila melanogaster] ...   | <a href="#">87.1</a> | 5e-16 | <b>UG</b> |
| <input checked="" type="checkbox"/> | <a href="#">ref XP_001984238.1</a> | GH15117 [Drosophila grimshawi] >gb EDV965...      | <a href="#">87.1</a> | 5e-16 | <b>G</b>  |
| <input checked="" type="checkbox"/> | <a href="#">ref XP_002061902.1</a> | GK16939 [Drosophila willistoni] >gb EDW72...      | <a href="#">87.1</a> | 5e-16 | <b>G</b>  |
| <input checked="" type="checkbox"/> | <a href="#">ref XP_002086307.1</a> | GE23065 [Drosophila yakuba] >gb EDW99708....      | <a href="#">87.1</a> | 6e-16 | <b>G</b>  |
| <input checked="" type="checkbox"/> | <a href="#">ref XP_002040612.1</a> | GM22258 [Drosophila sechellia] >gb EDW441...      | <a href="#">87.1</a> | 6e-16 | <b>G</b>  |
| <input checked="" type="checkbox"/> | <a href="#">emb CBE66942.1</a>     | CG6981-PA [Drosophila ananassae] >emb CBE6694...  | <a href="#">86.8</a> | 6e-16 |           |
| <input checked="" type="checkbox"/> | <a href="#">ref XP_001353299.1</a> | GA20002 [Drosophila pseudoobscura pseudoo...      | <a href="#">86.8</a> | 7e-16 | <b>G</b>  |

|                                     |                                    |                                                   |                      |       |    |
|-------------------------------------|------------------------------------|---------------------------------------------------|----------------------|-------|----|
| <input checked="" type="checkbox"/> | <a href="#">ref XP_976275.1</a>    | PREDICTED: similar to conserved hypothetical...   | <a href="#">86.8</a> | 7e-16 | UG |
| <input checked="" type="checkbox"/> | <a href="#">ref XP_002047884.1</a> | GJ13688 [Drosophila virilis] >gb EDW70226...      | <a href="#">86.4</a> | 8e-16 | G  |
| <input checked="" type="checkbox"/> | <a href="#">ref XP_002074415.1</a> | GK10529 [Drosophila willistoni] >gb EDW85...      | <a href="#">86.0</a> | 1e-15 | G  |
| <input checked="" type="checkbox"/> | <a href="#">emb CBE67045.1</a>     | CG6981-PA [Drosophila atripex]                    | <a href="#">86.0</a> | 1e-15 |    |
| <input checked="" type="checkbox"/> | <a href="#">ref XP_001948670.1</a> | PREDICTED: similar to CG13566 CG13566-PA,...      | <a href="#">86.0</a> | 1e-15 | G  |
| <input checked="" type="checkbox"/> | <a href="#">ref XP_002030493.1</a> | GM25471 [Drosophila sechellia] >gb EDW414...      | <a href="#">86.0</a> | 1e-15 | G  |
| <input checked="" type="checkbox"/> | <a href="#">ref XP_002084862.1</a> | GD14494 [Drosophila simulans] >gb EDX1044...      | <a href="#">85.6</a> | 1e-15 | G  |
| <input checked="" type="checkbox"/> | <a href="#">ref XP_002074859.1</a> | GK19222 [Drosophila willistoni] >gb EDW85...      | <a href="#">85.6</a> | 2e-15 | G  |
| <input checked="" type="checkbox"/> | <a href="#">ref XP_002043968.1</a> | GM13685 [Drosophila sechellia] >gb EDW512...      | <a href="#">85.6</a> | 2e-15 | G  |
| <input checked="" type="checkbox"/> | <a href="#">ref XP_001354994.2</a> | GA20224 [Drosophila pseudoobscura pseudoo...      | <a href="#">85.2</a> | 2e-15 | G  |
| <input checked="" type="checkbox"/> | <a href="#">ref XP_001984986.1</a> | GH14752 [Drosophila grimshawi] >gb EDV973...      | <a href="#">85.2</a> | 2e-15 | G  |
| <input checked="" type="checkbox"/> | <a href="#">ref XP_002075211.1</a> | GK16752 [Drosophila willistoni] >gb EDW86...      | <a href="#">84.8</a> | 2e-15 | G  |
| <input checked="" type="checkbox"/> | <a href="#">ref XP_002022417.1</a> | GL13023 [Drosophila persimilis] >gb EDW26...      | <a href="#">84.8</a> | 2e-15 | G  |
| <input checked="" type="checkbox"/> | <a href="#">ref XP_001986174.1</a> | GH21210 [Drosophila grimshawi] >gb EDW010...      | <a href="#">84.8</a> | 2e-15 | G  |
| <input checked="" type="checkbox"/> | <a href="#">ref XP_001972737.1</a> | GG15688 [Drosophila erecta] >gb EDV51763....      | <a href="#">84.4</a> | 3e-15 | G  |
| <input checked="" type="checkbox"/> | <a href="#">ref XP_001956408.1</a> | GF24609 [Drosophila ananassae] >gb EDV392...      | <a href="#">84.4</a> | 3e-15 | G  |
| <input checked="" type="checkbox"/> | <a href="#">ref XP_001843280.1</a> | conserved hypothetical protein [Culex qui...      | <a href="#">84.1</a> | 4e-15 | UG |
| <input checked="" type="checkbox"/> | <a href="#">ref XP_002094795.1</a> | GE22019 [Drosophila yakuba] >gb EDW94507....      | <a href="#">84.1</a> | 5e-15 | G  |
| <input checked="" type="checkbox"/> | <a href="#">ref XP_002027022.1</a> | GL21019 [Drosophila persimilis] >gb EDW34...      | <a href="#">83.7</a> | 5e-15 | G  |
| <input checked="" type="checkbox"/> | <a href="#">ref XP_002007920.1</a> | GI13205 [Drosophila mojavensis] >gb EDW18...      | <a href="#">83.7</a> | 6e-15 | G  |
| <input checked="" type="checkbox"/> | <a href="#">ref NP_729982.1</a>    | CG9628, isoform B [Drosophila melanogaster] ...   | <a href="#">83.7</a> | 6e-15 | UG |
| <input checked="" type="checkbox"/> | <a href="#">ref NP_648710.1</a>    | CG9628, isoform A [Drosophila melanogaster] ...   | <a href="#">82.9</a> | 1e-14 | G  |
| <input checked="" type="checkbox"/> | <a href="#">gb EFA08060.1</a>      | hypothetical protein TcasGA2_TC005656 [Triboli... | <a href="#">82.9</a> | 1e-14 |    |
| <input checked="" type="checkbox"/> | <a href="#">ref XP_001353700.2</a> | GA21923 [Drosophila pseudoobscura pseudoo...      | <a href="#">82.1</a> | 2e-14 | G  |
| <input checked="" type="checkbox"/> | <a href="#">ref NP_001156315.1</a> | hypothetical protein LOC100169413 [Acyrth...      | <a href="#">82.1</a> | 2e-14 | UG |
| <input checked="" type="checkbox"/> | <a href="#">ref XP_001977381.1</a> | GG19007 [Drosophila erecta] >gb EDV46308....      | <a href="#">81.0</a> | 3e-14 | G  |
| <input checked="" type="checkbox"/> | <a href="#">ref XP_002101085.1</a> | GE17420 [Drosophila yakuba] >gb EDX02193....      | <a href="#">81.0</a> | 4e-14 | G  |
| <input checked="" type="checkbox"/> | <a href="#">ref XP_966339.1</a>    | PREDICTED: similar to ryanodine receptor-lik...   | <a href="#">80.6</a> | 5e-14 | UG |
| <input checked="" type="checkbox"/> | <a href="#">ref XP_002430041.1</a> | conserved hypothetical protein [Pediculus...      | <a href="#">78.7</a> | 2e-13 | G  |
| <input checked="" type="checkbox"/> | <a href="#">ref XP_001357214.2</a> | GA12689 [Drosophila pseudoobscura pseudoo...      | <a href="#">77.9</a> | 3e-13 | G  |
| <input checked="" type="checkbox"/> | <a href="#">gb ACN94686.1</a>      | GA12689 [Drosophila miranda]                      | <a href="#">77.9</a> | 3e-13 |    |
| <input checked="" type="checkbox"/> | <a href="#">ref XP_002014263.1</a> | GL19107 [Drosophila persimilis] >gb EDW28...      | <a href="#">77.9</a> | 3e-13 | G  |
| <input checked="" type="checkbox"/> | <a href="#">ref XP_002427111.1</a> | conserved hypothetical protein [Pediculus...      | <a href="#">72.9</a> | 1e-11 | G  |
| <input checked="" type="checkbox"/> | <a href="#">ref XP_002427110.1</a> | conserved hypothetical protein [Pediculus...      | <a href="#">69.0</a> | 1e-10 | G  |
| <input checked="" type="checkbox"/> | <a href="#">ref XP_002038007.1</a> | GM17988 [Drosophila sechellia] >gb EDW544...      | <a href="#">62.9</a> | 1e-08 | G  |
| <input checked="" type="checkbox"/> | <a href="#">ref XP_001968858.1</a> | GG24274 [Drosophila erecta] >gb EDV57917....      | <a href="#">61.3</a> | 3e-08 | G  |
| <input checked="" type="checkbox"/> | <a href="#">ref XP_002089166.1</a> | GE18971 [Drosophila yakuba] >gb EDW88878....      | <a href="#">61.3</a> | 3e-08 | G  |
| <input checked="" type="checkbox"/> | <a href="#">ref NP_608969.1</a>    | CG14000 [Drosophila melanogaster] >gb AAM110...   | <a href="#">61.3</a> | 3e-08 | UG |
| <input checked="" type="checkbox"/> | <a href="#">gb EFA08059.1</a>      | hypothetical protein TcasGA2_TC005655 [Triboli... | <a href="#">60.2</a> | 7e-08 |    |
| <input checked="" type="checkbox"/> | <a href="#">ref XP_001962403.1</a> | GF15443 [Drosophila ananassae] >gb EDV316...      | <a href="#">56.7</a> | 9e-07 | G  |
| <input checked="" type="checkbox"/> | <a href="#">ref NP_572519.1</a>    | CG15366 [Drosophila melanogaster] >gb AAF464...   | <a href="#">54.0</a> | 5e-06 | UG |

NEW

NEW

NEW

NEW

NEW

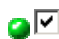

[ref|XP\\_002429371.1|](#) Cylicin-1, putative [*Pediculus humanus* co... [53.6](#) 7e-06

Sequences with E-value WORSE than threshold

|                          |                                     |                                                          |                      |       |  |  |
|--------------------------|-------------------------------------|----------------------------------------------------------|----------------------|-------|--|--|
| <input type="checkbox"/> | <a href="#">ref NP_611858.1 </a>    | CG13566 [ <i>Drosophila melanogaster</i> ] >gb AAF471... | <a href="#">42.1</a> | 0.017 |  |  |
| <input type="checkbox"/> | <a href="#">ref XP_002040187.1 </a> | GM15486 [ <i>Drosophila sechellia</i> ] >gb EDW570...    | <a href="#">41.7</a> | 0.024 |  |  |
| <input type="checkbox"/> | <a href="#">ref XP_001902958.1 </a> | hypothetical protein Bm1_57500 [ <i>Brugia ma...</i>     | <a href="#">41.3</a> | 0.031 |  |  |
| <input type="checkbox"/> | <a href="#">ref XP_001688606.1 </a> | AGAP004947-PA [ <i>Anopheles gambiae</i> str. PES...     | <a href="#">40.9</a> | 0.043 |  |  |
| <input type="checkbox"/> | <a href="#">ref XP_001976508.1 </a> | GG19973 [ <i>Drosophila erecta</i> ] >gb EDV56908....    | <a href="#">40.5</a> | 0.051 |  |  |
| <input type="checkbox"/> | <a href="#">ref XP_002092725.1 </a> | GE11506 [ <i>Drosophila yakuba</i> ] >gb EDW92437....    | <a href="#">40.1</a> | 0.080 |  |  |
| <input type="checkbox"/> | <a href="#">ref YP_003122623.1 </a> | hypothetical protein Cpin_2944 [ <i>Chitinoph...</i>     | <a href="#">39.4</a> | 0.13  |  |  |
| <input type="checkbox"/> | <a href="#">ref XP_001959449.1 </a> | GF12048 [ <i>Drosophila ananassae</i> ] >gb EDV362...    | <a href="#">38.2</a> | 0.31  |  |  |
| <input type="checkbox"/> | <a href="#">ref XP_002049979.1 </a> | GJ20448 [ <i>Drosophila virilis</i> ] >gb EDW61172...    | <a href="#">37.4</a> | 0.53  |  |  |
| <input type="checkbox"/> | <a href="#">ref XP_002019797.1 </a> | GL12591 [ <i>Drosophila persimilis</i> ] >gb EDW38...    | <a href="#">37.1</a> | 0.61  |  |  |
| <input type="checkbox"/> | <a href="#">ref XP_002063776.1 </a> | GK19098 [ <i>Drosophila willistoni</i> ] >gb EDW74...    | <a href="#">37.1</a> | 0.68  |  |  |
| <input type="checkbox"/> | <a href="#">ref XP_001359954.2 </a> | GA12902 [ <i>Drosophila pseudoobscura pseudo...</i>      | <a href="#">36.7</a> | 0.78  |  |  |

## Alignments

>  [ref|XP\\_001866470.1|](#) conserved hypothetical protein [*Culex quinquefasciatus*]  
[gb|EDS43424.1|](#) conserved hypothetical protein [*Culex quinquefasciatus*]  
 Length=185

[GENE ID: 6049759 CpipJ\\_CPIJ016150](#) | hypothetical protein  
 [*Culex quinquefasciatus*]

Score = 134 bits (339), Expect = 2e-30, Method: Composition-based stats.  
 Identities = 63/121 (52%), Positives = 88/121 (72%), Gaps = 0/121 (0%)

```

Query 6  LSIVKFLELALAITCVVLHYKSLGERDDTTELLTAGTFVGYSVILIALFAGYLLGNPLNK 65
      +SI+KFLEL L I C VLHY S + D T L+ GTF GY VIL + GYL+ +++
Sbjct 63  MSIIKFLELCLTIACTVLHYYSFDDGLVTGFLSTGTFCGYIVILTTVMVGYLMKAHVHR 122

Query 66  KLDLFFSLIGCAMFIASGVLILKEWENAWSTDTKKIAITKSSLAVTNGVLFFFDAIFTFR 125
      +L+LF+SL+GCA+F+ SGV I++ WE+A+ T T+ +AITK S+A+ NGV+F D IFTFR
Sbjct 123  RLNLFYSLGALFLTSGVFIIEAWEHAFRTRTRDLAITKGSIAIINGVIFLMDTIFTFR 182

Query 126  D 126
      +
Sbjct 183  E 183
  
```

>  [gb|AAY85037.1|](#) IP05651p [*Drosophila melanogaster*]  
 Length=172

Score = 127 bits (320), Expect = 4e-28, Method: Composition-based stats.  
 Identities = 63/123 (51%), Positives = 94/123 (76%), Gaps = 0/123 (0%)

```

Query 4  SRLSIVKFLELALAITCVVLHYKSLGERDDTTELLTAGTFVGYSVILIALFAGYLLGNPL 63
      RL++VKFLEL A+ C+VLH+ S +RD T L GTF GY +++I +FAG L+ P+
Sbjct 49  GRLNVVKFLELGFVAACLVLHFYSFNDRDIMTSFLATGTFTGYIIVVIGVFAGVLMRAPI 108

Query 64  NKKLDLFFSLIGCAMFIASGVLILKEWENAWSTDTKKIAITKSSLAVTNGVLFFFDAIFT 123
  
```

Sbjct 109 +K++D+FFS++GC +F+ASGV I++ WE ++ T T+ +A+ K+SL++ NGVLF FDA+FT  
HKRIDIFFSVLGCITLFFVASGVFIIEAWEFSTRTRTRDLALIKASLSIVNGVLFDFDAVFT 168

Query 124 FRD 126  
FRD

Sbjct 169 FRD 171

>  [ref|XP\\_001660923.1|](#)  hypothetical protein AaeL\_AAEL010558 [Aedes aegypti]  
[gb|EAT37454.1|](#)  conserved hypothetical protein [Aedes aegypti]  
Length=126

[GENE ID: 5573532 AaeL\\_AAEL010558](#) | hypothetical protein [Aedes aegypti]  
(10 or fewer PubMed links)

Score = 123 bits (310), Expect = 5e-27, Method: Composition-based stats.  
Identities = 90/126 (71%), Positives = 112/126 (88%), Gaps = 0/126 (0%)

Query 1 MAVSRLSIVKFLELALAITCVVLHYKSLGERDDTTELLTAGTFVGYSVILIALFAGYLLG 60  
MAVSRLS++KFLELAL I+CVVLHYKSLGE D+ T LL AGTFVGY+ILI LFAG+LLG

Sbjct 1 MAVSRLSMLKFLELALTISCVVLHYKSLGETDEMTVLLVAGTFVGYSIILIGLFAGHLLG 60

Query 61 NPLNKKLDLFFSLIGCAMFIASGVILILKEWENAWSTDTKKIAITKSSLAVTNGVLPFFDA 120  
NP+NKK+DLFFSL+GCAMFIASGVL+L+ WE+ + T+ +++AI+K +LA+ NG +FF D+

Sbjct 61 NPINKKIDLFFSLLGCAMFIASGVLVLQAWESGFKTERRRLAISKGALAIINGAVFFIDS 120

Query 121 IFTFRD 126  
IFTFRD

Sbjct 121 IFTFRD 126

>  [ref|XP\\_001866469.1|](#)  conserved hypothetical protein [Culex quinquefasciatus]  
[gb|EDS43423.1|](#)  conserved hypothetical protein [Culex quinquefasciatus]  
Length=126

[GENE ID: 6049758 CpipJ\\_CPIJ016149](#) | hypothetical protein  
[Culex quinquefasciatus]

Score = 122 bits (307), Expect = 1e-26, Method: Composition-based stats.  
Identities = 91/126 (72%), Positives = 112/126 (88%), Gaps = 0/126 (0%)

Query 1 MAVSRLSIVKFLELALAITCVVLHYKSLGERDDTTELLTAGTFVGYSVILIALFAGYLLG 60  
MAVSRLS+VKFLELA+ I+C VLHYKSLGE D+ T +L AGTFVG+SVILI LFAGYL+G

Sbjct 1 MAVSRLSLVKFLELAVTISCAVLHYKSLGESDELTIMLVAGTFVGFVILIGLFAGYLMG 60

Query 61 NPLNKKLDLFFSLIGCAMFIASGVILILKEWENAWSTDTKKIAITKSSLAVTNGVLPFFDA 120  
P+NKK+D+FFSLIGCAMFIASGVL+L+ WE+ + T+ +++AI+K SLA+ NGVLPFFDA

Sbjct 61 TPINKKIDIFFSLIGCAMFIASGVLVLQAWESGFKTERRRLAISKGLAIVNGVLPFFDA 120

Query 121 IFTFRD 126  
+FTFRD

Sbjct 121 VFTFRD 126

>  [gb|ACU30989.1|](#) secreted protein member of chemokine-like factor super family  
[Ochlerotatus triseriatus]  
Length=126

Score = 121 bits (305), Expect = 2e-26, Method: Composition-based stats.  
Identities = 93/125 (74%), Positives = 112/125 (89%), Gaps = 0/125 (0%)

Query 1 MAVSRLSIVKFLELALAITCVVLHYKSLGERDDTTELLTAGTFVGYSVILIALFAGYLLG 60  
MAVSRLSIVKFLELAL I+CV LHYKS+GE D+ T LL AGTFVGY++IL+ LFAGYLLG

Sbjct 1 MAVSRLSIVKFLELALTISCVLHYKSMGEADEMTRLLVAGTFVGYTIILVGLFAGYLLG 60

Query 61 NPLNKKLDLFFSLIGCAMFIASGVILILKEWENAWSTDTKKIAITKSSLAVTNGVLPFFDA 120  
P++KK+DLFFSL+GCAMFIASGVLIL+EWE+ + TD +K+AI+K +LAV NGVLPFFD+

Sbjct 61 EPISKKIDLFFSLLGCAMFIASGVLILQEWESGFKTDRRKMMAISKGALAVINGVLPFFDS 120

Query 121 IFTFR 125

+FTFR  
Sbjct 121 VFTFR 125

>  [gb|ACI30203.1](#) hypothetical conserved protein [Anopheles darlingi]  
Length=126

Score = 121 bits (305), Expect = 2e-26, Method: Composition-based stats.  
Identities = 122/126 (96%), Positives = 124/126 (98%), Gaps = 0/126 (0%)

Query 1 MAVSRLSIVKFLELALAITCVVLHYKSLGERDDTTELLTAGTFVGYSVILIALFAGYLLG 60  
MAVSRLSIVKFLELALAITCVVLHYKSLGERDDT+LLTAGTFVGYSVILIALFAGYLLG  
Sbjct 1 MAVSRLSIVKFLELALAITCVVLHYKSLGERDDTTKLLTAGTFVGYSVILIALFAGYLLG 60  
Query 61 NPLNKKLDLFFSLIGCAMFIASGVILILKEWENAWSTDTKKIAITKSSLAVTNGVLPFFDA 120  
NPLNKKLDLFFSLIGCAMFIASGVILILKEWENAWSTD+KKIAITK SLAVTNGVLPFFDA  
Sbjct 61 NPLNKKLDLFFSLIGCAMFIASGVILILKEWENAWSTD SKKIAITKGLAVTNGVLPFFDA 120  
Query 121 IFTFRD 126  
IFT RD  
Sbjct 121 IFTLRD 126

>  [ref|XP\\_309156.3](#)  AGAP000964-PA [Anopheles gambiae str. PEST]  
[gb|EAA04904.3](#)  AGAP000964-PA [Anopheles gambiae str. PEST]  
Length=129

[GENE ID: 1270459](#) [AgaP\\_AGAP000964](#) | AGAP000964-PA [Anopheles gambiae str. PEST]  
(10 or fewer PubMed links)

Score = 121 bits (305), Expect = 2e-26, Method: Composition-based stats.  
Identities = 114/126 (90%), Positives = 121/126 (96%), Gaps = 0/126 (0%)

Query 1 MAVSRLSIVKFLELALAITCVVLHYKSLGERDDTTELLTAGTFVGYSVILIALFAGYLLG 60  
MAVSRLSIVKFLELALAITCV+LHYKSLGERDD T+LL+AGTFVGYSVILIALFAGY+L  
Sbjct 4 MAVSRLSIVKFLELALAITCVILHYKSLGERDDITKLLSAGTFVGYSVILIALFAGYMLS 63  
Query 61 NPLNKKLDLFFSLIGCAMFIASGVILILKEWENAWSTDTKKIAITKSSLAVTNGVLPFFDA 120  
NP+NKKLDLFFSLIGCAMFIASGVILILKEWENAW+TDTKKI I+K SLAVTNGVLPFFDA  
Sbjct 64 NPINKKLDLFFSLIGCAMFIASGVILILKEWENAWNTDTKKIGISKGLAVTNGVLPFFDA 123  
Query 121 IFTFRD 126  
IFT RD  
Sbjct 124 IFTLRD 129

>  [gb|ACI30184.1](#) hypothetical conserved secreted protein [Anopheles darlingi]  
Length=126

Score = 121 bits (303), Expect = 3e-26, Method: Composition-based stats.  
Identities = 126/126 (100%), Positives = 126/126 (100%), Gaps = 0/126 (0%)

Query 1 MAVSRLSIVKFLELALAITCVVLHYKSLGERDDTTELLTAGTFVGYSVILIALFAGYLLG 60  
MAVSRLSIVKFLELALAITCVVLHYKSLGERDDTTELLTAGTFVGYSVILIALFAGYLLG  
Sbjct 1 MAVSRLSIVKFLELALAITCVVLHYKSLGERDDTTELLTAGTFVGYSVILIALFAGYLLG 60  
Query 61 NPLNKKLDLFFSLIGCAMFIASGVILILKEWENAWSTDTKKIAITKSSLAVTNGVLPFFDA 120  
NPLNKKLDLFFSLIGCAMFIASGVILILKEWENAWSTDTKKIAITKSSLAVTNGVLPFFDA  
Sbjct 61 NPLNKKLDLFFSLIGCAMFIASGVILILKEWENAWSTDTKKIAITKSSLAVTNGVLPFFDA 120  
Query 121 IFTFRD 126  
IFTFRD  
Sbjct 121 IFTFRD 126

>  [ref|XP\\_002040111.1](#)  GM16029 [Drosophila sechellia]  
[gb|EDW56976.1](#)  GM16029 [Drosophila sechellia]  
Length=223



[GENE ID: 6615740 Dsec\GM16029](#) | GM16029 gene product from transcript GM16029-RA [Drosophila sechellia] (10 or fewer PubMed links)

Score = 120 bits (302), Expect = 4e-26, Method: Composition-based stats.  
Identities = 22/124 (17%), Positives = 42/124 (33%), Gaps = 5/124 (4%)

```
Query 6 LSIVKFLELALAITCVVLHYKSLGERDDTTELLTAGTFVGYSVILIALFAGYLLGN-PLN 64
      + K +EL L++ C ++H+ E L GT+ G +I G P
Sbjct 10 WFLFKMMELLLSLGCCLVHWTCFMEEGVPPIFLLCGTYGGSVIICFISLIGAFYAERP 69

Query 65 KKLDLFFSLIGCAMFIASGVVILKEWENAWSTDTKKIAIT----KSSLAVTNGVLF 120
      K LF ++G + + + T+ + +A+ G ++
Sbjct 70 KHEALFGGILGGLHMVTYANMYVATLEEFRTERWPSFYACCRDINAIVALYAGAIYLMHC 129

Query 121 IFTF 124
      F
Sbjct 130 TFAL 133
```

>  [ref|NP\\_726341.1](#)  CG30184 [Drosophila melanogaster]  
[gb|AAM68254.1](#)  CG30184 [Drosophila melanogaster]  
[gb|AAY54811.1](#)  IP08069p [Drosophila melanogaster]  
Length=223

[GENE ID: 246506 CG30184](#) | CG30184 gene product from transcript CG30184-RA [Drosophila melanogaster] (10 or fewer PubMed links)

Score = 120 bits (301), Expect = 5e-26, Method: Composition-based stats.  
Identities = 22/124 (17%), Positives = 42/124 (33%), Gaps = 5/124 (4%)

```
Query 6 LSIVKFLELALAITCVVLHYKSLGERDDTTELLTAGTFVGYSVILIALFAGYLLGN-PLN 64
      + K +EL L++ C ++H+ E L GT+ G +I G P
Sbjct 10 WFLFKMMELLLSLGCCLVHWTCFMEEGVPPIFLLCGTYGGSVIICFISLIGAFYAERP 69

Query 65 KKLDLFFSLIGCAMFIASGVVILKEWENAWSTDTKKIAIT----KSSLAVTNGVLF 120
      K LF ++G + + + T+ + +A+ G ++
Sbjct 70 KHEALFGGILGGLHMVTYANMYVATLEEFRTERWPSFYACCRDINAIVALYAGAIYLMHC 129

Query 121 IFTF 124
      F
Sbjct 130 TFAL 133
```

>  [ref|XP\\_002082812.1](#)  GD11778 [Drosophila simulans]  
[gb|EDX08397.1](#)  GD11778 [Drosophila simulans]  
Length=223

[GENE ID: 6735902 Dsim\GD11778](#) | GD11778 gene product from transcript GD11778-RA [Drosophila simulans] (10 or fewer PubMed links)

Score = 119 bits (299), Expect = 9e-26, Method: Composition-based stats.  
Identities = 22/124 (17%), Positives = 42/124 (33%), Gaps = 5/124 (4%)

```
Query 6 LSIVKFLELALAITCVVLHYKSLGERDDTTELLTAGTFVGYSVILIALFAGYLLGN-PLN 64
      + K +EL L++ C ++H+ E L GT+ G +I G P
Sbjct 10 WFLFKMMELLLSLGCCLVHWTCFMEEGVPPIFLLCGTYGGSVIICFISLIGAFYAERP 69

Query 65 KKLDLFFSLIGCAMFIASGVVILKEWENAWSTDTKKIAIT----KSSLAVTNGVLF 120
      K LF ++G + + + T+ + +A+ G ++
Sbjct 70 KHEALFGGILGGLHMVTYANMYVATLEEFRTERWPSFYACCRDINAIVALYAGAIYLMHC 129

Query 121 IFTF 124
      F
Sbjct 130 TFAL 133
```

>  [ref|XP\\_001978654.1](#)  GG17559 [Drosophila erecta]  
[gb|EDV47581.1](#)  GG17559 [Drosophila erecta]  
Length=131

[GENE ID: 6549873 Dere\GG17559](#) | GG17559 gene product from transcript GG17559-RA [Drosophila erecta] (10 or fewer PubMed links)

Score = 117 bits (293), Expect = 5e-25, Method: Composition-based stats.  
Identities = 64/123 (52%), Positives = 94/123 (76%), Gaps = 0/123 (0%)

```
Query 4  SRLSIVKFLELALAITCVVLHYKSLGERDDTTELLTAGTFVGYSVILIALFAGYLLGNPL 63
          RL++VKFLEL AI C+VLH+ S +RD T L GTF GY +++I +FAG L+ P+
Sbjct 8  GRLNVVKFLELGFIAIACLVLFHYSFNDRDIMTSFLATGTFTGYIIVVIGVFAGVLMRAPI 67

Query 64  NKKLDLFFSLIGCAMFIASGVLILKEWENAWSTDTKKIAITKSSLAVTNGVLFFFDAIFT 123
          +K++D+FFS++GC +F+ASGV I++ WE ++ T T+ +A+ K+SL++ NGVLF FDA+FT
Sbjct 68  HKRIDIFFSVLGCSTLFFVAGSVFIIEAWEFSTRTRTRDLALIKASLSIVNGVLFVGFDAVFT 127

Query 124  FRD 126
          FRD
Sbjct 128  FRD 130
```

> [ref|XP\\_002055767.1|](#)  GJ19540 [Drosophila virilis]  
[gb|EDW65968.1|](#)  GJ19540 [Drosophila virilis]  
Length=131

[GENE ID: 6632158 Dvir\GJ19540](#) | GJ19540 gene product from transcript GJ19540-RA [Drosophila virilis] (10 or fewer PubMed links)

Score = 116 bits (292), Expect = 6e-25, Method: Composition-based stats.  
Identities = 65/122 (53%), Positives = 96/122 (78%), Gaps = 0/122 (0%)

```
Query 5  RLSIVKFLELALAITCVVLHYKSLGERDDTTELLTAGTFVGYSVILIALFAGYLLGNPLN 64
          RL++VKFLELA +I C+VLH+ S +RD T + GTF GY +++I +FAG L+ P++
Sbjct 9  RLNVVKFLELAFSIAIACLVLFHYSFNDRDIMTSFMATGTFTGYIIVVIGVFAGVLMRAPIH 68

Query 65  KKKLDLFFSLIGCAMFIASGVLILKEWENAWSTDTKKIAITKSSLAVTNGVLFFFDAIFTF 124
          K++D+FFS++GCA+F+ASGV I++ WE ++ T T+ +A+ K+SL++ NGVLF FDAIFTF
Sbjct 69  KRIDIFFSVLGCALFVAGSVFIIEAWEFSTRTRTRDLALIKASLSIVNGVLFVGFDAIFTF 128

Query 125  RD 126
          RD
Sbjct 129  RD 130
```

> [ref|XP\\_001354423.1|](#)  GA13737 [Drosophila pseudoobscura pseudoobscura]  
[ref|XP\\_002023021.1|](#)  GL16585 [Drosophila persimilis]  
[gb|EAL31476.1|](#)  GA13737 [Drosophila pseudoobscura pseudoobscura]  
[gb|EDW27126.1|](#)  GL16585 [Drosophila persimilis]  
Length=131

[GENE ID: 4814357 Dpse\GA13737](#) | GA13737 gene product from transcript GA13737-RA [Drosophila pseudoobscura pseudoobscura] (10 or fewer PubMed links)

Score = 116 bits (292), Expect = 6e-25, Method: Composition-based stats.  
Identities = 65/123 (52%), Positives = 95/123 (77%), Gaps = 0/123 (0%)

```
Query 4  SRLSIVKFLELALAITCVVLHYKSLGERDDTTELLTAGTFVGYSVILIALFAGYLLGNPL 63
          RL++VKFLEL A+ C+VLH+ S +RD T L GTF GY +++I +FAG L+ P+
Sbjct 8  GRLNVVKFLELGFVAVACLVLFHYSFNDRDIMTSFLATGTFTGYIIVVIGVFAGVLMRAPI 67

Query 64  NKKLDLFFSLIGCAMFIASGVLILKEWENAWSTDTKKIAITKSSLAVTNGVLFFFDAIFT 123
          +K++D+FFS++GCA+F+ASGV I++ WE ++ T T+ +A+ K+SL++ NGVLF FDAIFT
Sbjct 68  HKRIDIFFSVMGALFVAGSVFIIEAWEFSTRTRTRDLALIKASLSIVNGVLFVGFDAIFT 127

Query 124  FRD 126
          FRD
Sbjct 128  FRD 130
```

> [ref|NP\\_608423.1|](#)  CG15449 [Drosophila melanogaster]



[ref|XP\\_001967078.1|](#)  GF21858 [Drosophila ananassae]

[ref|XP\\_002101950.1|](#)  GE15320 [Drosophila yakuba]

[6 more sequence titles](#)

[ref|XP\\_002107515.1|](#)  GD15513 [Drosophila simulans]

[gb|AAF50865.1|](#)  CG15449 [Drosophila melanogaster]

[gb|EDV38397.1|](#)  GF21858 [Drosophila ananassae]

[gb|EDX03058.1|](#)  GE15320 [Drosophila yakuba]

[gb|EDX18500.1|](#)  GD15513 [Drosophila simulans]

[gb|ACL88209.1|](#) CG15449-PA [synthetic construct]

Length=131

[GENE ID: 33079 CG15449](#) | CG15449 gene product from transcript CG15449-RA [Drosophila melanogaster] (10 or fewer PubMed links)

Score = 116 bits (292), Expect = 6e-25, Method: Composition-based stats.  
Identities = 63/123 (51%), Positives = 94/123 (76%), Gaps = 0/123 (0%)

```
Query 4 SRLSIVKFLELALAITCVVLHYKSLGERDDTTELLTAGTFVGYSVILIALFAGYLLGNPL 63
      RL++VKFLEL A+ C+VLH+ S +RD T L GTF GY +++I +FAG L+ P+
Sbjct 8 GRLNVVKFLELGFVAACLVLHFYSFNDRDIMTSFLATGTFTGYIIVVIGVVFAGVLMRAPI 67

Query 64 NKKLDLFFSLIGCAMFIASGVLILKEWENAWSTDTKKIAITKSSSLAVTNGVLFFFDAIFT 123
      +K++D+FFS++GC +F+ASGV I++ WE ++ T T+ +A+ K+SL++ NGVLF FDA+FT
Sbjct 68 HKRIDIFFSVLGCITLFFVAGVFIIEAWEFSTRTRDLALIKASLSIVNGVLFVGFDAVFT 127

Query 124 FRD 126
      FRD
Sbjct 128 FRD 130
```

>  [ref|XP\\_002092643.1|](#)  GE14306 [Drosophila yakuba]

[gb|EDW92355.1|](#)  GE14306 [Drosophila yakuba]

Length=223

[GENE ID: 6531856 Dyak\GE14306](#) | GE14306 gene product from transcript GE14306-RA [Drosophila yakuba] (10 or fewer PubMed links)

Score = 116 bits (291), Expect = 8e-25, Method: Composition-based stats.  
Identities = 23/124 (18%), Positives = 42/124 (33%), Gaps = 5/124 (4%)

```
Query 6 LSIVKFLELALAITCVVLHYKSLGERDDTTELLTAGTFVGYSVILIALFAGYLLGN-PLN 64
      + K LEL L++ C ++H+ + D L GT+ G +I G P
Sbjct 10 WFLFKMLELLLSLGCCLVHWSCCKEDIPHIFLLCGTYGGSVIICFMSLIGAFYAERPTM 69

Query 65 KKLDFSLIGCAMFIASGVLILKEWENAWSTDTKKIAIT---KSSSLAVTNGVLFFFDA 120
      K LF ++G + + +T + +A+ G ++
Sbjct 70 KHEALFGGILGVLHMVTVYANMYVATLEEFRTKRWPSFYACCRNNAIVALYAGAIYLLHC 129

Query 121 IFTF 124
      F
Sbjct 130 TFAL 133
```

>  [ref|XP\\_002071641.1|](#)  GK10090 [Drosophila willistoni]

[gb|EDW82627.1|](#)  GK10090 [Drosophila willistoni]

Length=131

[GENE ID: 6648426 Dwil\GK10090](#) | GK10090 gene product from transcript GK10090-RA [Drosophila willistoni] (10 or fewer PubMed links)

Score = 116 bits (291), Expect = 9e-25, Method: Composition-based stats.  
Identities = 65/123 (52%), Positives = 95/123 (77%), Gaps = 0/123 (0%)

```
Query 4 SRLSIVKFLELALAITCVVLHYKSLGERDDTTELLTAGTFVGYSVILIALFAGYLLGNPL 63
      RL++VKFLELA A C++LH+ S +RD T L GTF GY ++++ +FAG L+ P+
Sbjct 8 GRLNLVKFLELAFATAACLILHFYSFNDRDIMTAFLATGTFTGYIIVVLGVFAGVLMRAPI 67
```

Query 64 NKKLDLFFSLIGCAMFIASGVLILKEWENAWSTDTKKIAITKSSSLAVTNGVLFFFDAIFT 123  
+K++D+FFS++GCA+F+ASGV I++ WE ++ T T+ +A+ K+SLA+ NGVLF FDAIFT  
Sbjct 68 HKRIDIFFSVLGCALFVASGVFIIEAWEFSTRTRTRDLALIKASLAIVNGVLFVGFDAIFT 127

Query 124 FRD 126  
FRD  
Sbjct 128 FRD 130

>  [ref|XP\\_001991178.1](#)  GH12523 [Drosophila grimshawi]  
[gb|EDV99802.1](#)  GH12523 [Drosophila grimshawi]  
Length=131

[GENE ID: 6564547 Dgri\GH12523](#) | GH12523 gene product from transcript GH12523-RA [Drosophila grimshawi] (10 or fewer PubMed links)

Score = 116 bits (290), Expect = 1e-24, Method: Composition-based stats.  
Identities = 64/123 (52%), Positives = 96/123 (78%), Gaps = 0/123 (0%)

Query 4 SRLSIVKFLELALAITCVVLHYKSLGERDDTTELLTAGTFVGYSVILIALFAGYLLGNPL 63  
RL++VKFLELA ++ C+VLH+ S +RD T + GTF GY +++I +FAG L+ P+  
Sbjct 8 GRLNVVKFLELAFSVACLVLHFYSFNDRDILTSFMATGTFTGYIIVVIGVFAGVLMRAPI 67

Query 64 NKKLDLFFSLIGCAMFIASGVLILKEWENAWSTDTKKIAITKSSSLAVTNGVLFFFDAIFT 123  
+K++D+FFS++GCA+F+ASGV I++ WE ++ T T+ +A+ K+SL++ NGVLF FDAIFT  
Sbjct 68 HKRIDIFFSVLGCALFVASGVFIIEAWEFSTRTRTRDLALIKASLSIVNGVLFVGFDAIFT 127

Query 124 FRD 126  
FRD  
Sbjct 128 FRD 130

>  [ref|XP\\_002010101.1](#)  GI14877 [Drosophila mojavensis]  
[gb|EDW07418.1](#)  GI14877 [Drosophila mojavensis]  
Length=131

[GENE ID: 6584446 Dmoj\GI14877](#) | GI14877 gene product from transcript GI14877-RA [Drosophila mojavensis] (10 or fewer PubMed links)

Score = 116 bits (290), Expect = 1e-24, Method: Composition-based stats.  
Identities = 63/123 (51%), Positives = 96/123 (78%), Gaps = 0/123 (0%)

Query 4 SRLSIVKFLELALAITCVVLHYKSLGERDDTTELLTAGTFVGYSVILIALFAGYLLGNPL 63  
RL++VKFLELA ++ C+VLH+ S +RD T + GTF GY +++I +FAG L+ P+  
Sbjct 8 GRLNVVKFLELAFSVACLVLHFYSFNDRDIMTSFMATGTFTGYIIVVIGVFAGVLMRAPI 67

Query 64 NKKLDLFFSLIGCAMFIASGVLILKEWENAWSTDTKKIAITKSSSLAVTNGVLFFFDAIFT 123  
+K++D+FFS++GCA+F+ASG+ I++ WE ++ T T+ +A+ K+SL++ NGVLF FDAIFT  
Sbjct 68 HKRIDIFFSVLGCALFVASGIFIIIEAWEFSTRTRTRDLALIKASLSIVNGVLFVGFDAIFT 127

Query 124 FRD 126  
FRD  
Sbjct 128 FRD 130

>  [ref|XP\\_001660924.1](#)  hypothetical protein AaeL\_AAEL010564 [Aedes aegypti]  
[gb|EAT37455.1](#)  conserved hypothetical protein [Aedes aegypti]  
Length=131

[GENE ID: 5573526 AaeL\\_AAEL010564](#) | hypothetical protein [Aedes aegypti] (10 or fewer PubMed links)

Score = 114 bits (287), Expect = 3e-24, Method: Composition-based stats.  
Identities = 62/121 (51%), Positives = 88/121 (72%), Gaps = 0/121 (0%)

Query 6 LSIVKFLELALAITCVVLHYKSLGERDDTTELLTAGTFVGYSVILIALFAGYLLGNPLNK 65  
LSI+KFLEL LA+ C VLHY S + D T L GTF GY VIL + GYL+ +++  
Sbjct 9 LSIKFLLELCLAVACTVLHYYSFDDGLVTGFLATGTFCGYIVILTTVMVGYLMKAHIHR 68

Query 66 KLDLFFSLIGCAMFIASGVLILKEWENAWSTDTKKIAITKSSSLAVTNGVLFFFDAIFTFR 125

Sbjct 69 +L+LF+SL+GCA+F+ +G+ I++ WE+A+ T T+ +AITK S+A+ NGV+F D IFTFR  
RLNLFYSLGLGCALFLTAGIFIIIEAWEHAFRTRTRDLAITKGSIAIINGVIFLMDTIFTFR 128

Query 126 D 126  
+

Sbjct 129 E 129

>  [ref|XP\\_975314.1](#) PREDICTED: similar to CG15449 CG15449-PA [Tribolium castaneum]  
[gb|EFA08752.1](#)  hypothetical protein TcasGA2\_TC006429 [Tribolium castaneum]  
Length=128

[GENE ID: 664209 TcasGA2\\_TC006429](#) | similar to CG15449 CG15449-PA  
[Tribolium castaneum] (10 or fewer PubMed links)

Score = 114 bits (285), Expect = 4e-24, Method: Composition-based stats.  
Identities = 56/125 (44%), Positives = 87/125 (69%), Gaps = 0/125 (0%)

Query 1 MAVSRLSIVKFLELALAITCVVLHYKSLGERDDTTELLTAGTFVGYSVILIALFAGYLLG 60  
MAVSRLSI+KFLELA+A+TC+ LHYKS D T L+ F G+ +IL+ FAG+L+

Sbjct 1 MAVSRLSIIKFLELAI+VTCIGLHYKSEVPGDFNTNTLSVAAFGGFVILVGGFAGHLMS 60

Query 61 NPLNKKLDLFFSLIGCAMFIASGVILILKEWENAWSTDTKKIAITKSSLAVTNGVLPFFDA 120  
P+N+++D+FF L+GCA FIA+G + ++ +++ + + + K+SLA+ G LF D+

Sbjct 61 TPINRRRIDIFFCLVGCATFIAAGAMNIEYFKDVRKGEYRDYGLAKASLAIIGGALFLVDS 120

Query 121 IFTFR 125  
+ T+R

Sbjct 121 LLTWR 125

>  [ref|XP\\_001976431.1](#) GG22868 [Drosophila erecta]  
[gb|EDV56831.1](#)  GG22868 [Drosophila erecta]  
Length=223

[GENE ID: 6547887 Dere\GG22868](#) | GG22868 gene product from transcript GG22868-RA  
[Drosophila erecta] (10 or fewer PubMed links)

Score = 114 bits (285), Expect = 4e-24, Method: Composition-based stats.  
Identities = 23/124 (18%), Positives = 43/124 (34%), Gaps = 5/124 (4%)

Query 6 LSIVKFLELALAITCVVLHYKSLGERDDTTELLTAGTFVGYSVILIALFAGYLLGN-PLN 64  
+ K +EL L++ C ++H+ + L GT+ G +I I G P

Sbjct 10 WFLFKMMELLSLGCCLVHWSCKKEGIPHIFLLCGTYGGSVIICIMSLIGAFYAERPTM 69

Query 65 KKLDFLFFSLIGCAMFIASGVILILKEWENAWSTDTKKIAIT---KSSLAVTNGVLPFFDA 120  
K LF ++G I + + T+ + +A+ G ++

Sbjct 70 KHEALFGGILGSLHMITVYANMYVATLEEFRTERWPSFYACCRDINAIVALYAGAIYLLHC 129

Query 121 IFTF 124  
F

Sbjct 130 TFAL 133

>  [ref|XP\\_309155.3](#) AGAP000963-PA [Anopheles gambiae str. PEST]  
[gb|EAA04905.4](#)  AGAP000963-PA [Anopheles gambiae str. PEST]  
Length=131

[GENE ID: 1270458 AgaP\\_AGAP000963](#) | AGAP000963-PA [Anopheles gambiae str. PEST]  
(10 or fewer PubMed links)

Score = 113 bits (284), Expect = 5e-24, Method: Composition-based stats.  
Identities = 64/121 (52%), Positives = 87/121 (71%), Gaps = 0/121 (0%)

Query 6 LSIVKFLELALAITCVVLHYKSLGERDDTTELLTAGTFVGYSVILIALFAGYLLGNPLNK 65  
LSI+KFLEL+LA+TC LHY S + D T L GTF G+ VIL + AGYL+ L++

Sbjct 9 LSIIKFLELSLAVTCTTLHYYSFNDGLVLTGFLATGTF CGFIVILFTVMAGYLMKAHLHR 68

Query 66 KLDLFFSLIGCAMFIASGVILILKEWENAWSTDTKKIAITKSSLAVTNGVLPFFDAIFTFR 125  
+L +F+SL+GC F+ SGV I++ WE+A+ T T+ +AITK S+AV NGV+F D IFTFR

Sbjct 69 RLSIFYSLLGVCVFLTSGVFIIEAWEHAFRTRTRDLAITKGSIAVINGVIFLMDTIFTFR 128

Query 126 D 126

+

Sbjct 129 E 129

> [ref|NP\\_001091800.1|](#)  hypothetical protein LOC778505 [Bombyx mori]

[gb|ABJ97187.1|](#)  hypothetical protein [Bombyx mori]

Length=126

[GENE ID: 778505 LOC778505](#) | hypothetical protein LOC778505 [Bombyx mori]

Score = 110 bits (275), Expect = 5e-23, Method: Composition-based stats.  
Identities = 56/125 (44%), Positives = 83/125 (66%), Gaps = 1/125 (0%)

Query 1 MAVSRLSIVKFLELALAITCVVLHYKSLGERDDTTELLTAGTFVGYSVILIALFAGYLLG 60

MA+SRLSI+KFLELAL +CV LHY S D +L GTFVGY +I AGY++

Sbjct 1 MAISRLSIKFLLEALTCSCVALHYHSY-NADADIGMLVTGTFVGYLIIFAGAAAGYIMQ 59

Query 61 NPLNKKLDLFFSLIGCAMFIASGVILILKEWENAWSTDTKKIAITKSSLAVTNGVLFFFDA 120

P +K++D+F+SL+G A+F+ASG +I+ +++ ++ K + K+SLA+ NG + DA

Sbjct 60 TPShKRIDIFYSLVGVALFVASGAIIDRFQHYGKSEIKDKNLAKASLAIINGAILLVDA 119

Query 121 IFTFR 125

+ T R

Sbjct 120 VLTQR 124

> [ref|XP\\_001361089.1|](#)  GA15708 [Drosophila pseudoobscura pseudoobscura]

[gb|EAL25665.1|](#)  GA15708 [Drosophila pseudoobscura pseudoobscura]

Length=226

[GENE ID: 4804546 Dpse\GA15708](#) | GA15708 gene product from transcript GA15708-RA [Drosophila pseudoobscura pseudoobscura] (10 or fewer PubMed links)

Score = 106 bits (266), Expect = 6e-22, Method: Composition-based stats.  
Identities = 21/130 (16%), Positives = 40/130 (30%), Gaps = 11/130 (8%)

Query 6 LSIVKFLELALAITCVVLHYKSLGERDDTTELLTAGTFVGYSVILIALFAGYLLGN-PLN 64

+ K LEL L+ C +H++ + L T+ G S+I + G P

Sbjct 8 WLLFKVLELVLSFCCCYIHWRCFQDEGIPHIFLLCATYGGSSIICLLAIIGMFYAEKPTM 67

Query 65 KKLDLFFSLIGCAMFIASGVILILKEWENAWSTDTKKIAIT-----KSSLAVTNGV 114

+ F L G + V + K +++A+

Sbjct 68 QLESAPFSGFLGTLHLVTIFVHMYLALHGNKLVYLSQGANWHGYICCRDNATVALYATA 127

Query 115 LFFFDAIFTF 124

+++ F

Sbjct 128 VYYLHCTFAL 137

> [ref|XP\\_001966751.1|](#)  GF19114 [Drosophila ananassae]

[gb|EDV33796.1|](#)  GF19114 [Drosophila ananassae]

Length=125

[GENE ID: 6501877 Dana\GF19114](#) | GF19114 gene product from transcript GF19114-RA [Drosophila ananassae] (10 or fewer PubMed links)

Score = 106 bits (266), Expect = 7e-22, Method: Composition-based stats.  
Identities = 42/126 (33%), Positives = 71/126 (56%), Gaps = 3/126 (2%)

Query 1 MAVSRLSIVKFLELALAITCVVLHYKSLGERDDTTELLTAGTFVGYSVILIALFAGYLLG 60

M + ++K +ELA++I C+V++ L+ GT G+++I L G+++

Sbjct 1 MEFNNRLLLKIIELAISIAICIVMYEVDGALSSRP--LIVCGTIGGFTIICGVLLIGHVIN 58

Query 61 NPLNKKLDLFFSLIGCAMFIASGVILILKEWENA-WSTDTKKIAITKSSLAVTNGVLFFFD 119

+ + K+L+ SLIGC +F+ASG L++ EW +A TD K+ AI SL + NG +F D

Sbjct 59 SLVEKRLNALISLIGCVLFVASGALVIDEWHDLQTDKRKRNIAAGSLMIINGAVFLLD 118

Query 120 AIFTFR 125  
+ R  
Sbjct 119 TLSICR 124

> [ref|XP\\_002018237.1|](#)  GL16872 [Drosophila persimilis]  
[gb|EDW36076.1|](#)  GL16872 [Drosophila persimilis]  
Length=226

[GENE ID: 6592425 Dper\GL16872](#) | GL16872 gene product from transcript GL16872-RA [Drosophila persimilis] (10 or fewer PubMed links)

Score = 105 bits (262), Expect = 2e-21, Method: Composition-based stats.  
Identities = 21/130 (16%), Positives = 40/130 (30%), Gaps = 11/130 (8%)

Query 6 LSIVKFLELALAITCVVLHYKSLGERDDTTELLTAGTFVGYSVILIALFAGYLLGN-PLN 64  
+ K LEL L+ C +H++ + L T+ G S+I + G P  
Sbjct 8 WLLFKVLELVLVSLFCCCYIHWRCFQDEGIPHIFLLCATYGGSSIIICLLAIIGMFYAEKPTM 67

Query 65 KKLDLFFSLIGCAMFIASGVILILKEWENAWSTDTKKIAIT-----KSSLAVTNGV 114  
+ F L G + V + K +++A+  
Sbjct 68 QLESASFGLFGTLHLVTIFVHMYLALHGNKLLYLKSGANWHGYYICCRDNATVALYATA 127

Query 115 LFFFDAIFTF 124  
+++ F  
Sbjct 128 VYYLHCAFAL 137

> [ref|XP\\_002055067.1|](#)  GJ19171 [Drosophila virilis]  
[gb|EDW65268.1|](#)  GJ19171 [Drosophila virilis]  
Length=126

[GENE ID: 6631609 Dvir\GJ19171](#) | GJ19171 gene product from transcript GJ19171-RA [Drosophila virilis] (10 or fewer PubMed links)

Score = 104 bits (261), Expect = 2e-21, Method: Composition-based stats.  
Identities = 41/127 (32%), Positives = 69/127 (54%), Gaps = 4/127 (3%)

Query 1 MAVSRLSIVKFLELALAITCVVLHYKSLGERDDTTELLTAGTFVGYSVILIALFAGYLLG 60  
M + ++K +EL +AI CVVL+ L+ GT G+++I L G+++  
Sbjct 1 MEFNRRLLKIIELGIAIACVVLVEVVDLSKRP--LIVCGTIGGFIIICAVLLIGHVIN 58

Query 61 NPLNKKLDLFFSLIGCAMFIASGVILILKEWEN--AWSTDTKKIAITKSSLAVTNGVLF 118  
+ + K+L+ SL+GC +F+ASG L++ EW + + D K+ AI SL + NG +F  
Sbjct 59 SVVEKRLNALISLLGCILFVASGALVIDEWHDIYDFLKDRKRNAIAAGSLMIINGAVFLL 118

Query 119 DAIFTFR 125  
D + R  
Sbjct 119 DTLSICR 125

> [ref|XP\\_002039595.1|](#)  GM22643 [Drosophila sechellia]  
[gb|EDW56337.1|](#)  GM22643 [Drosophila sechellia]  
Length=121

[GENE ID: 6615179 Dsec\GM22643](#) | GM22643 gene product from transcript GM22643-RA [Drosophila sechellia] (10 or fewer PubMed links)

Score = 104 bits (259), Expect = 4e-21, Method: Composition-based stats.  
Identities = 55/111 (49%), Positives = 84/111 (75%), Gaps = 0/111 (0%)

Query 16 LAITCVVLHYKSLGERDDTTELLTAGTFVGYSVILIALFAGYLLGNPLNKKLDLFFSLIG 75  
A+ C+VLH+ S +RD T L GTF GY +++I +FAG L+ P++K++D+FFS++G  
Sbjct 10 FAVACLVLHFYSFNDRDIMTSFLATGTFGTGYIIVVIGVFAGVLMRAPIHKRIDIFFSVLG 69

Query 76 CAMFIASGVILILKEWENAWSTDTKKIAITKSSLAVTNGVLF 126  
C +F+ASGV I++ WE ++ T T+ +A+ K+SL++ NGVLF FDA+F+TFRD  
Sbjct 70 CTLFVASGVFIIEAWEFSTRTRTRDLALIKASLSIVNGVLFVGFDAVFTFRD 120

> [ref|NP\\_572518.1](#)  CG7267 [*Drosophila melanogaster*]  
[ref|XP\\_002106511.1](#)  GD16087 [*Drosophila simulans*]  
[gb|AAF46435.2](#)  CG7267 [*Drosophila melanogaster*]  
[gb|EDX17464.1](#)  GD16087 [*Drosophila simulans*]  
[gb|ACP28219.1](#)  GM12243p [*Drosophila melanogaster*]  
Length=125

[GENE ID: 31831 CG7267](#) | CG7267 gene product from transcript CG7267-RB  
[*Drosophila melanogaster*] (Over 10 PubMed links)

Score = 103 bits (258), Expect = 5e-21, Method: Composition-based stats.  
Identities = 46/126 (36%), Positives = 71/126 (56%), Gaps = 3/126 (2%)

```
Query 1 MAVSRLSIVKFLELALAITCVVLHYKSLGERDDTTELLTAGTFVGYSVILIALFAGYLLG 60
M + ++K +ELA+AI C+VL+ ++ AGT GY+VI L G++L
Sbjct 1 MEFNNRLLLKIIELAIACIVLYETVGNLS--LHPVIVAGTVGGYTVICGVLLIGHVLN 58

Query 61 NPLNKKLDLFFSLIGCAMFIASGVLILKEWENA-WSTDTKKIAITKSSLAVTNGVLFFFD 119
+ + K+L+ FSLIGC +F+ASG L++ EW +TD K+ AI SL + N +F D
Sbjct 59 SLVEKRLNALFSLIGCLLFVASGALVIDEWHGGLLNTDRKRQAIGAGSLMIINA AVFLD 118

Query 120 AIFTFR 125
+ R
Sbjct 119 TLCICR 124
```

> [ref|XP\\_001606621.1](#)  PREDICTED: hypothetical protein [*Nasonia vitripennis*]  
Length=562

[GENE ID: 100123014 LOC100123014](#) | hypothetical protein LOC100123014  
[*Nasonia vitripennis*]

Score = 102 bits (254), Expect = 1e-20, Method: Composition-based stats.  
Identities = 49/113 (43%), Positives = 75/113 (66%), Gaps = 3/113 (2%)

```
Query 13 ELALAITCVVLHYKSLGERDDTTELLTAGTFVGYSVILIALFAGYLLGNPLNKKLDLFFS 72
E LA + LHY S + +LT GT+ GY +IL+ LFAG ++G P+N+++DLFFS
Sbjct 450 EQLLACILIGLHYHS--QTYGHEMMLTTGTTCYGYVILVGLFAGGVMGTPVNRVLDLFFS 507

Query 73 LIGCAMFIASGVLILKEWENAWSTDTKKIAITKSSLAVTNGVLFFFDAIFTFR 125
L+GCA+FIASG +++ S ++ + K+S+++ GVLFF DA+FTF+
Sbjct 508 LVGCALFIASGAVVIDN-HQHESGESFNKHMAKASISIIIEGVLFVDAVFTFK 559
```

> [gb|ACN69164.1](#) hypothetical conserved secreted protein [*Stomoxys calcitrans*]  
Length=127

Score = 101 bits (253), Expect = 2e-20, Method: Composition-based stats.  
Identities = 41/128 (32%), Positives = 70/128 (54%), Gaps = 5/128 (3%)

```
Query 1 MAVSRLSIVKFLELALAITCVVLHYKSLGERDDTTELLTAGTFVGYSVILIALFAGYLLG 60
M + ++K LEL +AI C+VL S + L+ GT G++VI + G+++
Sbjct 1 MQFNRRVLLKILELVIAIVCIVLWETSGNFSN--NALIVCGTMGGFAVICGVILIGHVIN 58

Query 61 NPLNKKLDLFFSLIGCAMFIASGVLILKEWENA---WSTDTKKIAITKSSLAVTNGVLF 117
+ K+++ FS+IGC +F+ SG LI+ +W + ++K+ A+ SL + NG +F
Sbjct 59 SVXEKRINGLFSIIGCVLFVISGALIIDQWHDRSLLLFKESKRNALAAGSLMIINGAVFL 118

Query 118 FDAIFTFR 125
D I FR
Sbjct 119 MDTISIFR 126
```

> [ref|XP\\_001959837.1](#)  GF13066 [*Drosophila ananassae*]  
[gb|EDV36659.1](#)  GF13066 [*Drosophila ananassae*]  
Length=228

[GENE ID: 6495909 Dana\GF13066](#) | GF13066 gene product from transcript GF13066-RA

[Drosophila ananassae] (10 or fewer PubMed links)

Score = 100 bits (249), Expect = 6e-20, Method: Composition-based stats.  
Identities = 22/124 (17%), Positives = 39/124 (31%), Gaps = 5/124 (4%)

```

Query 6  LSIVKFLLELALAITCVVLHYKSLGERDDTTELLTAGTFVGYSVILIALFAGYLLGN-PLN 64
      +K E L+ C +HY L GT+ G S++ G P
Sbjct 11  WLFLKLTTEFLLSGGCCYMHYYCFMTEKIPHMFLLCGTYGGSSIMCFLAVIGVFYAEKPAM 70

Query 65  KKLDLFFSLIGCAMFIASGVVILKEWENAWSTDTK----KIAITKSSLAVTNGVLFFFDA 120
      K F +++G + + N + + S +A+ +FF
Sbjct 71  KYEAAFSAILGSMFLLTVFAQMHMATMNNFKQKHWAGFYECRDNSLIALLYAAAIFFIHC 130

Query 121  IFTF 124
      F+
Sbjct 131  SFSL 134

```

> [ref|XP\\_001661199.1|](#) **UG** hypothetical protein AaeL\_AAEL010956 [Aedes aegypti]  
[gb|EAT37006.1|](#) **G** conserved hypothetical protein [Aedes aegypti]  
 Length=172

[GENE ID: 5574129 AaeL\\_AAEL010956](#) | hypothetical protein [Aedes aegypti]  
 (10 or fewer PubMed links)

Score = 98.7 bits (245), Expect = 2e-19, Method: Composition-based stats.  
 Identities = 31/131 (23%), Positives = 51/131 (38%), Gaps = 13/131 (9%)

```

Query 8  IVKFLLELALAITCVVLHYKSLGER-----DDTTELLTAGTFVGYSVILIALFAGYLLGN 61
      + K LELA+AI C+ L T L TFV + + + G ++
Sbjct 34  VFKLLELAVAIICIGLIDDPANNSRLRPFATTRTIALAYSTFVPLMFSVIYLFQKVIRES 93

Query 62  PLNKKLDLFFSLIGCAMFIASGVVILKEWENAW-----STDTKKIAITKSSLAVTNGV 114
      + KL +L +++A+ + IL +W +T S+AV +
Sbjct 94  NIPWKLQSLNLTAFILYLATAICILHDWSETKNRNYWPPNTQRMDFLCAGSVAVVVGAL 153

Query 115  LFFFDAIFTFR 125
      L+ D I T R
Sbjct 154  LYLLDLIVTTR 164

```

> [ref|XP\\_001845632.1|](#) **UG** conserved hypothetical protein [Culex quinquefasciatus]  
[gb|EDS40988.1|](#) **G** conserved hypothetical protein [Culex quinquefasciatus]  
 Length=149

[GENE ID: 6035445 CpipJ\\_CPIJ003950](#) | hypothetical protein  
 [Culex quinquefasciatus]

Score = 97.5 bits (242), Expect = 4e-19, Method: Composition-based stats.  
 Identities = 31/138 (22%), Positives = 52/138 (37%), Gaps = 19/138 (13%)

```

Query 6  LSIVKFLLELALAITC-----VVLHYKSLGERDDTTELLTAGTFVGYSVILIALFA 55
      ++I+K L L + I V + E+ E++ +G FVGY +
Sbjct 1  MAILKALNLVILIIYRTGYGGDFLGVGGTWNLNNEEKSPDAEIVASGVFVGYFIYTSVQLI 60

Query 56  GYLLGNPLNKKL--DLFFSLIGCAMFIASGVVILKEWENAWS-----TDTKKIAITKS 106
      + G K+ D +++G M+IA G L W T + +
Sbjct 61  TFCFGTTKLRKRELSDTIMNVVGTFMWIAVGGTALHYWHGFQPEYDFQQITsertaglamg 120

Query 107  SLAVTNGVLFFFDAIFTF 124
      SL V G L+ D++ F
Sbjct 121  SLCVVTGALYLADSVLAF 138

```

> [ref|XP\\_002423901.1|](#) **G** conserved hypothetical protein [Pediculus humanus corporis]  
[gb|EEB11163.1|](#) **G** conserved hypothetical protein [Pediculus humanus corporis]  
 Length=143

[GENE ID: 8238019 Phum\\_PHUM094210](#) | hypothetical protein  
 [Pediculus humanus corporis]



Score = 95.6 bits (237), Expect = 1e-18, Method: Composition-based stats.  
Identities = 46/112 (41%), Positives = 69/112 (61%), Gaps = 1/112 (0%)

```
Query 15 ALAITCVVLHYKSLGERDDTTELLTAGTFVGYSVILIALFAGYLLGNPLNKKLDLFFSLI 74
          L ITCV LHY S D +++ GTF G+ +ILI ++AGYL P++K++D F+S+
Sbjct 7 LLTITCVGLHYHSFEANDKYGLIVSTGTFGFLIILIGVYAGYLFSPISKRIDAFYSIC 66

Query 75 GCAMFIASGVILILKEW-ENAWSTDTKKIAITKSSLAVTNGVLFVFFDAIFTFR 125
          GCA+F+ASG L + + + I + K SLAV NG++F DAI +
Sbjct 67 GCALFVASGALSIDHFQHKKYDKELSDIGLAKGSLAVINGLVFLVDAIVNRK 118
```

>  [ref|XP\\_001119879.1|](#)  PREDICTED: similar to CG15449-PA [Apis mellifera]  
Length=128

[GENE ID: 724580 LOC724580](#) | similar to CG15449-PA [Apis mellifera]  
(10 or fewer PubMed links)

Score = 93.3 bits (231), Expect = 8e-18, Method: Composition-based stats.  
Identities = 48/126 (38%), Positives = 76/126 (60%), Gaps = 1/126 (0%)

```
Query 1 MAVSRLSIVKFLELALAITCVVLHYKSLGERDDTTELLTAGTFVGYSVILIALFAGYLLG 60
          M +++ +I K +EL + + LHY S + + LT GTF GY +IL+ + G +LG
Sbjct 1 MGMNKATIFKVVELIIVCVLIGLHYHSFSDSSLMSAFLTMGTFGGYLIILVGMCLGIILG 60

Query 61 NPLNKKLDLFFSLIGCAMFIASGVILILKEWENA-WSTDTKKIAITKSSLAVTNGVLFVFFD 119
          ++ +LDLFFS++GC +FI +G LIL + NA + + + I K +++ GVLF D
Sbjct 61 ATIDHRLDLFFSIVGCILFIIAGALILDHFINAVYRGNFRNTGIAKGLISIVQGVFLID 120

Query 120 AIFTFR 125
          A+F FR
Sbjct 121 AVFAFR 126
```

>  [ref|XP\\_001655679.1|](#)  hypothetical protein AaeL\_AAEL002578 [Aedes aegypti]  
[gb|EAT46164.1|](#)  conserved hypothetical protein [Aedes aegypti]  
Length=146

[GENE ID: 5575305 AaeL\\_AAEL002578](#) | hypothetical protein [Aedes aegypti]  
(10 or fewer PubMed links)

Score = 92.1 bits (228), Expect = 1e-17, Method: Composition-based stats.  
Identities = 25/113 (22%), Positives = 43/113 (38%), Gaps = 9/113 (7%)

```
Query 21 VVLHYKSLGERDDTTELLTAGTFVGYSVILIALFAGYLLGNPLNKKL--DLFFSLIGCAM 78
          V + E+ E++ +G FVG Y + + G K+ D +++G M
Sbjct 23 VGGTWNLNNEEKSPDAEIVASGVFVGYFIYTSVQLITFCFGTTKLRKRELSDTIMNVVGTFM 82

Query 79 FIASGVILILKEWENA-----WSTDTKKIAITKSSLAVTNGVLFVFFDAIFTF 124
          ++A G L W T + + SL V G L+ D++ F
Sbjct 83 WVAVGGTALHYWHGYLAEHDFQHITsertagLALGSLCVVTGALYLADSVLAF 135
```

>  [ref|XP\\_001995529.1|](#)  GH17713 [Drosophila grimshawi]  
[gb|EDV95181.1|](#)  GH17713 [Drosophila grimshawi]  
Length=235

[GENE ID: 6569554 Dgri\GH17713](#) | GH17713 gene product from transcript GH17713-RA  
[Drosophila grimshawi] (10 or fewer PubMed links)

Score = 92.1 bits (228), Expect = 2e-17, Method: Composition-based stats.  
Identities = 34/123 (27%), Positives = 59/123 (47%), Gaps = 1/123 (0%)

```
Query 1 MAVSRLSIVKFLELALAITCVVLHYKSLGERDDTTELLTAGTFVGYSVILIALFAGYLLG 60
          M + ++K LEL + ++L + +L GT GY +I AL G+LLG
Sbjct 1 MEFNRRLLKILELIFTASIIILIE TVADLSYSSQAMLVCGTLTG YLIICSALS SVGHLLG 60

Query 61 NPLNKKLDLFFSLIGCAMFIASGVILILKEWENAWSTDT-KKIAITKSSLAVTNGVLFVFFD 119
          ++K++D+ S+ GC +F+++G +IL W + K + LA+ V+F D
```

Sbjct 61 ANVDKRIDIIISVSGCVLHVSTGAIILSRWSGCYEARDKNTMLASGVLAIVAIVIFIAID 120

Query 120 AIF 122

Sbjct 121 TFV 123

Score = 86.8 bits (214), Expect = 7e-16, Method: Composition-based stats.  
Identities = 38/112 (33%), Positives = 62/112 (55%), Gaps = 4/112 (3%)

Query 16 LAITCVVLHYKSLGERDDTTELLTAGTFVGYSVILIALFAGYLLGNPLNKKLDLFFSLIG 75  
+AI C+VL+ L+ GT G+++I L G++LG+ + K+L+ SL+G

Sbjct 125 IAIACIVLYEVVGDLSKRP--LIVCGTIGGFTHICAVLLVGHVLSVVEKRLNALISLLG 182

Query 76 CAMFIASGVLILKEWEN--AWSTDTKKIAITKSSLAVTNGVLFDFDAIFTFR 125  
C +F+ASG L++ EW + + D K+ AI SL + NG +F D + R

Sbjct 183 CILFVASGALVIDEWHMYEFLKDRKRNAIAAGSLMIINGAVFLLDLSICR 234

>  [ref|XP\\_002009616.1](#)  GI15456 [Drosophila mojavensis]

[gb|EDW06933.1](#)  GI15456 [Drosophila mojavensis]

Length=128

[GENE ID: 6583956 Dmoj\GI15456](#) | GI15456 gene product from transcript GI15456-RA [Drosophila mojavensis] (10 or fewer PubMed links)

Score = 91.8 bits (227), Expect = 2e-17, Method: Composition-based stats.  
Identities = 33/125 (26%), Positives = 58/125 (46%), Gaps = 1/125 (0%)

Query 1 MAVSRLSIVKFLELALAITCVVLHYKSLGERDDTTELLTAGTFVGYSVILIALFAGYLLG 60  
M + ++K +EL + ++L + +L GT GY +I AL G+LLG

Sbjct 1 MEFNRRLLKIIELIFTASIIILIESVTDHSYSSQAMLVCGTLTGyliicsalsighllg 60

Query 61 NPLNKKLDLFFSLIGCAMFIASGVLILKEWENAWS-TDTKIAITKSSLAVTNGVLFDFD 119  
L+K++D+ F++ GC +F+++G +I W + T K + L+ F D

Sbjct 61 AKLDRIDILFTVSGCVLHVSTGAIIFDRWHRVELTRNKNTILASGVLsfataaffivd 120

Query 120 AIFTF 124

F

Sbjct 121 TFVIF 125

>  [ref|XP\\_001949085.1](#)  PREDICTED: similar to conserved hypothetical protein [Acyrtosiphon pisum]

Length=128

[GENE ID: 100167617 LOC100167617](#) | similar to conserved hypothetical protein [Acyrtosiphon pisum]

Score = 91.4 bits (226), Expect = 3e-17, Method: Composition-based stats.  
Identities = 55/126 (43%), Positives = 82/126 (65%), Gaps = 1/126 (0%)

Query 1 MAVSRLSIVKFLELALAITCVVLHYKSLGERDDTTELLTAGTFVGYSVILIALFAGYLLG 60  
MA++++++KFLLELAL I VLHY S D T+ ++T GT+VGY +IL +F G G

Sbjct 1 MAITKITMIKFLELALTIIFVLHYNSFPGGDTTSIMITTTGTYVGYVILLAGIFIGLFTG 60

Query 61 NPLNKKLDLFFSLIGCAMFIASGVLILKEWEN-AWSTDTKKIAITKSSLAVTNGVLFDFD 119  
P++ +LD+FF LIG A+FI SGV+ + A + +TK+ L++ NGV+F D

Sbjct 61 TPISRLDMFFVLIGAAALFITSGVMSYNYNGFALKSSVNTGLTKAWLSILNGVVFVVD 120

Query 120 AIFTFR 125

A FT+R

Sbjct 121 AAFTYR 126

>  [dbj|BAH71208.1](#) ACYPI008397 [Acyrtosiphon pisum]

Length=128

Score = 90.6 bits (224), Expect = 4e-17, Method: Composition-based stats.  
Identities = 54/126 (42%), Positives = 81/126 (64%), Gaps = 1/126 (0%)

Query 1 MAVSRLSIVKFLELALAITCVVLHYKSLGERDDTTELLTAGTFVGYSVILIALFAGYLLG 60  
 MA++++++KFLLELAL I VLHY D T+ ++T GT+VGY +IL +F G G  
 Sbjct 1 MAITKITMIKFLELALTIIFVLHYNRFPGGDTTSIMITTTGYVGYVILLAGIFIGLFTG 60

Query 61 NPLNKKLDLFFSLIGCAMFIASGVLILKEWEN-AWSTDTKKIAITKSSLAVTNGVLFFFD 119  
 P++ +LD+FF LIG A+FI SGV+ + A + +TK+ L++ NGV+F D  
 Sbjct 61 TPISRRLDMFFVLIGAAALFITSGVMSYNYNGFALKSSYVNTGLTKAWLSILNGVVFVVD 120

Query 120 AIFTFR 125  
 A FT+R  
 Sbjct 121 AAFTYR 126

>  [ref|XP\\_002047342.1](#) |  GJ11981 [Drosophila virilis]  
[gb|EDW69684.1](#) |  GJ11981 [Drosophila virilis]  
 Length=287

[GENE ID: 6623648 Dvir\GJ11981](#) | GJ11981 gene product from transcript GJ11981-RA [Drosophila virilis] (10 or fewer PubMed links)

Score = 90.6 bits (224), Expect = 4e-17, Method: Composition-based stats.  
 Identities = 21/132 (15%), Positives = 45/132 (34%), Gaps = 13/132 (9%)

Query 6 LSIVKFLELALAITCVVLHYKSLGE--RDDTTELLTAGTFVGYSVILIALFAGYLLGNPL 63  
 + + LE+ C+ +H + L+ GTF+GY ++ + + G  
 Sbjct 5 WLLFRALEMIFESICMAIHMVASLHFAEPMHCLIFCGTFIGYLLAFIRWVRLISGQRT 64

Query 64 NKKLDLFFSLIGCAMFIASGVLILKEWENAW-----STDTKKIAI-----TKSSLAVTN 112  
 +F SL G + +L + EN + + +S + +  
 Sbjct 65 LLHPAMFISLSGMLLHFICALLSMNYAENDFHLKYMGPQEELDHVFFGFCKQQSVVCIVT 124

Query 113 GVLFFFDAIFTF 124  
 G ++ +I  
 Sbjct 125 GAIYLMQSILLL 136

>  [gb|ABV44719.1](#) | ryanodine receptor-like protein [Phlebotomus papatasi]  
 Length=157

Score = 90.2 bits (223), Expect = 6e-17, Method: Composition-based stats.  
 Identities = 25/141 (17%), Positives = 50/141 (35%), Gaps = 23/141 (16%)

Query 7 SIVKFLELALAITC-----VVLHYKSLGERDDTTELLTAGTFVGYSVILIA 52  
 +K +L L I V + E+ E++ +G VG+ +  
 Sbjct 10 VFLKVPKLVNLIVILYRTGYGGDFLGVGGTWNLNNEEKSPDAEIVASGVIVGFMIYTSV 69

Query 53 LFAGYLLGNPLNKKL--DLFFSLIGCAMFIASGVLILKEWENAWS-----TDTKKIAI 103  
 Y G +K+ D +++G M++A G L W +++ +  
 Sbjct 70 QLITYAFGTTAHKRELSDTIMNVVGTFMWVAVGGTALHYWHGYMPDHDFLHVATERQVGL 129

Query 104 TKSSLAVTNGVLFFFDAIFTF 124  
 +L + +G L+ D + F  
 Sbjct 130 AMGALCIISGALYLVDTVLAF 150

>  [ref|XP\\_001984136.1](#) |  GH16269 [Drosophila grimshawi]  
[gb|EDV96484.1](#) |  GH16269 [Drosophila grimshawi]  
 Length=275

[GENE ID: 6557491 Dgri\GH16269](#) | GH16269 gene product from transcript GH16269-RA [Drosophila grimshawi] (10 or fewer PubMed links)

Score = 90.2 bits (223), Expect = 7e-17, Method: Composition-based stats.  
 Identities = 19/132 (14%), Positives = 43/132 (32%), Gaps = 13/132 (9%)

Query 6 LSIVKFLELALAITCVVLHYKSLGE--RDDTTELLTAGTFVGYSVILIALFAGYLLGNPL 63  
 + K L++ L + C+ +H L+ GTF + ++ + + G  
 Sbjct 5 WLLFKVLQVLDLICISIHITGSLHFAEPLPHNLIFCGTFSSFFLLSVIRCIRLIGGQRT 64

Query 64 NKKLDLFFSLIGCAMFIASGVLILKEWENAW-----STDTKKIA----ITKSSL-AVTN 112  
 +L ++ + + ++ E + + A K SL +  
 Sbjct 65 VLHPELIIAVCSMLLHFICAWVSMQYAEQDFHLQFMGPREELDHAYFGYCKKQSLACIVT 124

Query 113 GVLFFFDAIFTF 124  
 G ++ AI  
 Sbjct 125 GAVYLLQAILVL 136

>  [ref|XP\\_002005498.1](#)  GI20498 [Drosophila mojavensis]  
[gb|EDW09433.1](#)  GI20498 [Drosophila mojavensis]  
 Length=209

[GENE ID: 6579616 Dmoj\GI20498](#) | GI20498 gene product from transcript GI20498-RA [Drosophila mojavensis] (10 or fewer PubMed links)

Score = 89.8 bits (222), Expect = 8e-17, Method: Composition-based stats.  
 Identities = 20/130 (15%), Positives = 42/130 (32%), Gaps = 11/130 (8%)

Query 6 LSIVKFLELALAITCVLHYKSLGERDDTTELLTAGTFVGYSVILIALFAGYLLGNPLNK 65  
 ++ K LE+ L+ C H E + T+ ++ +A G L +  
 Sbjct 10 WALFKILEIFLSSACCYRHLFCYLEHQIPNVFILCATYASGVLLGVAGLVGSLFYERVAH 69

Query 66 KLDLFFS-LIGCAMFIASGVLILKEWENAWSTDTKKIAITK-----SSLAVTNGV 114  
 +++ S +G I V + N + ++ K ++ A  
 Sbjct 70 RVEALMSGTMGTLMNMITVYVHMYLLEHNQLMSFLREQEQEKYAFLICKSNATWAWFAVG 129

Query 115 LFFFDAIFTF 124  
 L++ F  
 Sbjct 130 LYYLHCSFAL 139

>  [ref|XP\\_311473.3](#)  AGAP010471-PA [Anopheles gambiae str. PEST]  
[gb|EAA07189.3](#)  AGAP010471-PA [Anopheles gambiae str. PEST]  
 Length=157

[GENE ID: 1272566 AgaP\\_AGAP010471](#) | AGAP010471-PA [Anopheles gambiae str. PEST] (10 or fewer PubMed links)

Score = 87.9 bits (217), Expect = 3e-16, Method: Composition-based stats.  
 Identities = 23/113 (20%), Positives = 45/113 (39%), Gaps = 9/113 (7%)

Query 21 VVLHYKSLGERDDTTELLTAGTFVGYSVILIALFAGYLLGNPLNKKL--DLFFSLIGCAM 78  
 + + E+ E++ +G FVG+ + + G +K D +++G M  
 Sbjct 38 IGGTWNLNEEKSPDAEIVASGVFVGFIIYTGQVLLTFGFGTTKHKYELSDTIMNVVGTFM 97

Query 79 FIASGVLILKEWENAWS-----TDTKKIAITKSSLAVTNGVLFVFFFDAIFTF 124  
 ++A G L W + T + + +L V NG L+ D++ F  
 Sbjct 98 WVAVGGTALHYWHGYLAEHDFENITSSERTAGLALGALCVINGALYLADSVLAF 150

>  [ref|XP\\_002008949.1](#)  GI13768 [Drosophila mojavensis]  
[gb|EDW19425.1](#)  GI13768 [Drosophila mojavensis]  
 Length=162

[GENE ID: 6583276 Dmoj\GI13768](#) | GI13768 gene product from transcript GI13768-RA [Drosophila mojavensis] (10 or fewer PubMed links)

Score = 87.5 bits (216), Expect = 4e-16, Method: Composition-based stats.  
 Identities = 24/113 (21%), Positives = 45/113 (39%), Gaps = 9/113 (7%)

Query 21 VVLHYKSLGERDDTTELLTAGTFVGYSVILIALFAGYLLGNPLNKKL--DLFFSLIGCAM 78  
 + + E+ E++ +G VG+ + Y G +K D +++G M  
 Sbjct 38 IGGTWNLNEEKSADAEIVASGVMVGFIIYTGCHTIAFFGTTKHKGELCDTIMNVVGTFM 97

Query 79 FIASGVLILKEWENAWSTD-----TKKIAITKSSLAVTNGVLFVFFFDAIFTF 124  
 +IA G + L W+ S + +++ I SL V G L+ D +  
 Sbjct 98 WIAVGGVALHYWKGYMSDEGFLYVNSERQVGIAMGSLCVIEGALYLLDVTLAC 150

> [ref|XP\\_002050796.1|](#)  GJ22349 [Drosophila virilis]

[gb|EDW61989.1|](#)  GJ22349 [Drosophila virilis]

Length=219

[GENE ID: 6626080 Dvir\GJ22349](#) | GJ22349 gene product from transcript GJ22349-RA [Drosophila virilis] (10 or fewer PubMed links)

Score = 87.5 bits (216), Expect = 4e-16, Method: Composition-based stats.  
Identities = 19/130 (14%), Positives = 35/130 (26%), Gaps = 12/130 (9%)

```
Query 6 LSIVKFLELALAITCVVLHYKSLGERDDTTELLTAGTFVGYSVILIALFAGYLLGN-PLN 64
      + K EL ++ +H L + L TF S+I I G +
Sbjct 10 WVLFKIFELLISSISGYVHLNGLNDG-IPHIFLPCATFGSGSIIGILSLVGTFFADQLTM 68

Query 65 KKLDLFFSLIGCAMFIASGVLILKEWENAWSTDTKKIAITK-----SSLAVTNGV 114
      L +G + N K + K + L++
Sbjct 69 WFEALTSGLTGLTYLANVYAHMYLVQHMKMLPFLKDLLEEKDGYIICCKRNAILSLEYAVA 128

Query 115 LFFFDAIFTF 124
      +++ F
Sbjct 129 IYYLHCTFAL 138
```

> [ref|XP\\_002009617.1|](#)  GI15457 [Drosophila mojavensis]

[gb|EDW06934.1|](#)  GI15457 [Drosophila mojavensis]

Length=119

[GENE ID: 6583957 Dmoj\GI15457](#) | GI15457 gene product from transcript GI15457-RA [Drosophila mojavensis] (10 or fewer PubMed links)

Score = 87.5 bits (216), Expect = 4e-16, Method: Composition-based stats.  
Identities = 39/112 (34%), Positives = 62/112 (55%), Gaps = 4/112 (3%)

```
Query 16 LAITCVVLHYKSLGERDDTTELLTAGTFVGYSVILIALFAGYLLGNPLNKKLDLFFSLIG 75
      +AI CVVL+ L+ GT VGY++I L G+ + + + K+L+ SL+G
Sbjct 9 IAIACVVLYEVVGDLSKRP--LIVCGTIVGYTIICAVLLIGHFINSVVEKRLNALLSLLG 66

Query 76 CAMFIASGVLILKEWENAWS--TDTKKIAITKSSLAVTNGVLFVFFDAIFTFR 125
      C +F+ASG L++ EW +A+ D K+ A+ SL + NG +F D + R
Sbjct 67 CILFVASGALVIDEWHDAYDFLKDRKRNALAAGSLMIINGAVFLLDMLSICR 118
```

> [ref|XP\\_001973440.1|](#)  GG16083 [Drosophila erecta]

[gb|EDV52466.1|](#)  GG16083 [Drosophila erecta]

Length=162

[GENE ID: 6545790 Dere\GG16083](#) | GG16083 gene product from transcript GG16083-RA [Drosophila erecta] (10 or fewer PubMed links)

Score = 87.5 bits (216), Expect = 4e-16, Method: Composition-based stats.  
Identities = 27/141 (19%), Positives = 53/141 (37%), Gaps = 23/141 (16%)

```
Query 7 SIVKFLELALAITC-----VVLHYKSLGERDDTTELLTAGTFVGYSVILIA 52
      +K L+L + + + + E+ E++ +G VG+ +
Sbjct 10 IFIKALKLIINLVILFLYRWGDGGEFLGIGGTWNLNEEKSAEIVASGVMVGFLIYTGC 69

Query 53 LFAGYLLGNPLNKKL--DLFFSLIGCAMFIASGVLILKEWENAWSTD-----TKKIAI 103
      + G +K D +++GC M+IA G + L W+ S + +++ I
Sbjct 70 HTIAFAFGTTKHKGELCDTIMNVVGCIMWIAVGGVALHYWKGYMSDEGFVYVNAERQVGI 129

Query 104 TKSSLAVTNGVLFVFFDAIFTF 124
      SL V G L+ D +
Sbjct 130 AMGSLCVIEGALYLLDTVLAC 150
```

> [ref|XP\\_002009021.1|](#)  GI11493 [Drosophila mojavensis]

[gb|EDW19497.1|](#)  GI11493 [Drosophila mojavensis]

Length=175

[GENE ID: 6583351 Dmoj\GI11493](#) | GI11493 gene product from transcript GI11493-RA [Drosophila mojavensis] (10 or fewer PubMed links)

Score = 87.5 bits (216), Expect = 4e-16, Method: Composition-based stats.  
Identities = 26/133 (19%), Positives = 51/133 (38%), Gaps = 13/133 (9%)

```
Query 6  LSIVKFLELALAITCVVLHYKSLGERD-----DTTELLTAGTFVGYSVILIALFAGYLL 59
L +K +EL L I C+ L + L TF ++ L
Sbjct 35  LITIKVVELCLLICCLGLIDEPATNSHLRVFITPRVMALCYVTFGALTIYTAIYLIMALF 94

Query 60  GNPLNKKLDLFFSLIGCAMFIASGVILILKEWENAWSTDTK-----KIAITKSSLAVTN 112
G+ + +SL G ++IA L+ ++W N + + +S+++
Sbjct 95  GDLTWPWRTATLWSLAGFILYIAVTALLFRDWSNTKDRNYWHPNMHRLDLVMASASISLVT 154

Query 113  GVLFFFDAIFTFR 125
G+++ D + T R
Sbjct 155  GLIYLLDVLLTIR 167
```

> [ref|XP\\_001956640.1](#)  GF25311 [Drosophila ananassae]  
[gb|EDV39446.1](#)  GF25311 [Drosophila ananassae]  
Length=162

[GENE ID: 6507934 Dana\GF25311](#) | GF25311 gene product from transcript GF25311-RA [Drosophila ananassae] (10 or fewer PubMed links)

Score = 87.1 bits (215), Expect = 5e-16, Method: Composition-based stats.  
Identities = 27/141 (19%), Positives = 52/141 (36%), Gaps = 23/141 (16%)

```
Query 7  SIVKFLELALAITCV-----VLHYKSLGERDDTTELLTAGTFVGYSVILIA 52
+K L+L + + + + E+ E++ +G VG+ +
Sbjct 10  IFIKALKLIINLVIIFLYRWGDGGEFLGIGGTWNLNEEKSADAEIVASGVMVGFLIYTGC 69

Query 53  LFAGYLLGNPLNKKL--DLFFSLIGCAMFIASGVILILKEWENAWSTD-----TKKIAI 103
Y G +K D +++G M+IA G + L W+ S + +++ I
Sbjct 70  HTIAYAFGTTKHKGELCDTIMNVVGTIMWIAVGGVALHYWKGYMSDEGFLYVNSERQVGI 129

Query 104  TKSSLAVTNGVLFVFFDAIFTF 124
SL V G L+ D +
Sbjct 130  AMGSLCVIEGALYLLDVTVLAC 150
```

> [ref|XP\\_002048071.1](#)  GJ13758 [Drosophila virilis]  
[gb|EDW70413.1](#)  GJ13758 [Drosophila virilis]  
Length=162

[GENE ID: 6624462 Dvir\GJ13758](#) | GJ13758 gene product from transcript GJ13758-RA [Drosophila virilis] (10 or fewer PubMed links)

Score = 87.1 bits (215), Expect = 5e-16, Method: Composition-based stats.  
Identities = 25/113 (22%), Positives = 46/113 (40%), Gaps = 9/113 (7%)

```
Query 21  VVLHYKSLGERDDTTELLTAGTFVGYSVILIALFAGYLLGNPLNKKL--DLFFSLIGCAM 78
+ + E+ E++ +G VG+ + YL G +K D +++G M
Sbjct 38  IGGTWNLNNEEKSADAEIVASGVMVGFIIYTAUGHTIAYLFGTTKHKGELCDTIMNVVGTFM 97

Query 79  FIASGVILILKEWENAWSTD-----TKKIAITKSSLAVTNGVLFVFFDAIFTF 124
+IA G + L W+ S + +++ I SL V G L+ D +
Sbjct 98  WIAVGGVALHYWKGYMSDEGFLYVNSERQVGIAMGSLCVIEGALYLLDVTVLAC 150
```

> [ref|NP\\_649184.1](#)  CG6981, isoform A [Drosophila melanogaster]  
[ref|NP\\_730487.1](#)  CG6981, isoform B [Drosophila melanogaster]  
[ref|XP\\_002095512.1](#)  GE19647 [Drosophila yakuba]  
[32 more sequence titles](#)

[ref|XP\\_002085601.1](#)  GD14857 [Drosophila simulans]

[gb|AAF49062.1|](#)  CG6981, isoform A [Drosophila melanogaster]  
[gb|AAG22313.1|](#)  CG6981, isoform B [Drosophila melanogaster]  
[gb|AAK93461.1|](#)  LP03829p [Drosophila melanogaster]  
[emb|CAL26659.1|](#)  CG6981 [Drosophila melanogaster]  
[emb|CAL26660.1|](#)  CG6981 [Drosophila melanogaster]  
[emb|CAL26661.1|](#)  CG6981 [Drosophila melanogaster]  
[emb|CAL26662.1|](#)  CG6981 [Drosophila melanogaster]  
[emb|CAL26663.1|](#)  CG6981 [Drosophila melanogaster]  
[emb|CAL26664.1|](#)  CG6981 [Drosophila melanogaster]  
[emb|CAL26665.1|](#)  CG6981 [Drosophila melanogaster]  
[emb|CAL26666.1|](#)  CG6981 [Drosophila melanogaster]  
[emb|CAL26667.1|](#)  CG6981 [Drosophila melanogaster]  
[emb|CAL26668.1|](#)  CG6981 [Drosophila melanogaster]  
[emb|CAL26669.1|](#)  CG6981 [Drosophila melanogaster]  
[emb|CAL26670.1|](#)  CG6981 [Drosophila melanogaster]  
[emb|CAL26671.1|](#)  CG6981 [Drosophila simulans]  
[gb|EDW95224.1|](#)  GE19647 [Drosophila yakuba]  
[gb|EDX11186.1|](#)  GD14857 [Drosophila simulans]  
[gb|ACL90605.1|](#) CG6981-PA [synthetic construct]

[emb|CAR93744.1|](#)  CG6981-PA [Drosophila melanogaster]  
[emb|CAR93745.1|](#)  CG6981-PA [Drosophila melanogaster]  
[emb|CAR93746.1|](#)  CG6981-PA [Drosophila melanogaster]  
[emb|CAR93747.1|](#)  CG6981-PA [Drosophila melanogaster]  
[emb|CAR93748.1|](#)  CG6981-PA [Drosophila melanogaster]  
[emb|CAR93749.1|](#)  CG6981-PA [Drosophila melanogaster]  
[emb|CAR93750.1|](#)  CG6981-PA [Drosophila melanogaster]  
[emb|CAR93751.1|](#)  CG6981-PA [Drosophila melanogaster]  
[emb|CAR93752.1|](#)  CG6981-PA [Drosophila melanogaster]  
[emb|CAR93753.1|](#)  CG6981-PA [Drosophila melanogaster]  
[emb|CAR93754.1|](#)  CG6981-PA [Drosophila melanogaster]  
[emb|CAR93755.1|](#)  CG6981-PA [Drosophila melanogaster]

Length=162

[GENE ID: 40207 CG6981](#) | CG6981 gene product from transcript CG6981-RB [Drosophila melanogaster] (Over 10 PubMed links)

Score = 87.1 bits (215), Expect = 5e-16, Method: Composition-based stats.  
 Identities = 27/141 (19%), Positives = 53/141 (37%), Gaps = 23/141 (16%)

```

Query 7 SIVKFLELALAITCV-----VLHYKSLGERDDTTELLTAGTFVGVYSVILIA 52
      +K L+L + + + + E+ E++ +G VG+ +
Sbjct 10 IFIKALKLIINLVIIFLYRWGDGGEFLGIGGTWNLNEEKSADAEIVASGVMVGFLIYTGC 69

Query 53 LFAGYLLGNPLNKKL--DLFFSLIGCAMFIASGVILILKEWENAWSTD-----TKKIAI 103
      + G +K D +++GC M+IA G + L W+ S + +++ I
Sbjct 70 HTIAFAFGTTKHKGELCDTIMNVVGCIMWIAVGGVALHYWKGYMSDEGFLYVNSERQVGI 129

Query 104 TKSSLAVINGVLFFFDAIFTF 124
      SL V G L+ D +
Sbjct 130 AMGSLCVIEGALYLLDTVLAC 150
  
```

>  [ref|XP\\_001984238.1|](#)  GH15117 [Drosophila grimshawi]  
[gb|EDV96586.1|](#)  GH15117 [Drosophila grimshawi]  
 Length=162

[GENE ID: 6556525 Dgri\GH15117](#) | GH15117 gene product from transcript GH15117-RA [Drosophila grimshawi] (10 or fewer PubMed links)



Score = 87.1 bits (215), Expect = 5e-16, Method: Composition-based stats.  
Identities = 25/113 (22%), Positives = 46/113 (40%), Gaps = 9/113 (7%)

```
Query 21 VVLHYKSLGERDDTTELLTAGTFVGYSVILIALFAGYLLGNPLNKKL--DLFFSLIGCAM 78
+ + E+ E++ +G VG+ + YL G +K D +++G M
Sbjct 38 IGGTWNLNNEEKSADAEIVASGVMVGFLLIYTGCHTIAYLFGTTKHKGELCDTIMNVVGTIM 97

Query 79 FIASGVLLILKEWENAWSTD-----TKKIAITKSSLAVTNGVLFFFDAIFTF 124
+IA G + L W+ S + +++ I SL V G L+ D +
Sbjct 98 WIAVGGVALHYWKGYMSDEGFLYVNSERQVGIAMGSLCVIEGALYLLDVTVLAC 150
```

> [ref|XP\\_002061902.1|](#)  GK16939 [Drosophila willistoni]  
[gb|EDW72888.1|](#)  GK16939 [Drosophila willistoni]  
Length=162

[GENE ID: 6639374 Dwil\GK16939](#) | GK16939 gene product from transcript GK16939-RA  
[Drosophila willistoni] (10 or fewer PubMed links)

Score = 87.1 bits (215), Expect = 5e-16, Method: Composition-based stats.  
Identities = 26/141 (18%), Positives = 52/141 (36%), Gaps = 23/141 (16%)

```
Query 7 SIVKFLELALAITCV-----VLHYKSLGERDDTTELLTAGTFVGYSVILIA 52
+K L+L + + + + E+ E++ +G VG+ +
Sbjct 10 IFIKALKLVINLVIIIFLYRWGDGGEFLGIGGTWNLNNEEKSADAEIVASGVMVGFLLIYTG 69

Query 53 LFAGYLLGNPLNKKL--DLFFSLIGCAMFIASGVLLILKEWENAWSTD-----TKKIAI 103
Y G +K D +++G M++A G + L W+ S + +++ I
Sbjct 70 HTIAYAFGTTKHKGELCDTIMNVVGVFMWVAVGGVALHYWKGYMSDEGFLYVNSERQVGI 129

Query 104 TKSSLAVTNGVLFFFDAIFTF 124
SL V G L+ D +
Sbjct 130 AMGSLCVIEGALYLLDVTVLAC 150
```

> [ref|XP\\_002086307.1|](#)  GE23065 [Drosophila yakuba]  
[gb|EDW99708.1|](#)  GE23065 [Drosophila yakuba]  
Length=162

[GENE ID: 6539416 Dyak\GE23065](#) | GE23065 gene product from transcript GE23065-RA  
[Drosophila yakuba] (10 or fewer PubMed links)

Score = 87.1 bits (215), Expect = 6e-16, Method: Composition-based stats.  
Identities = 27/141 (19%), Positives = 53/141 (37%), Gaps = 23/141 (16%)

```
Query 7 SIVKFLELALAITCV-----VLHYKSLGERDDTTELLTAGTFVGYSVILIA 52
+K L+L + + + + E+ E++ +G VG+ +
Sbjct 10 IFIKALKLIINLVIIIFLYRWGDGGEFLGIGGTWNLNNEEKSADAEIVASGVMVGFLLIYTG 69

Query 53 LFAGYLLGNPLNKKL--DLFFSLIGCAMFIASGVLLILKEWENAWSTD-----TKKIAI 103
+ G +K D +++GC M+IA G + L W+ S + +++ I
Sbjct 70 HTIAYAFGTTKHKGELCDTIMNVVGCIMWIAVGGVALHYWKGYMSDEGFLYVNSERQVGI 129

Query 104 TKSSLAVTNGVLFFFDAIFTF 124
SL V G L+ D +
Sbjct 130 AMGSLCVIEGALYLLDVTVLAC 150
```

> [ref|XP\\_002040612.1|](#)  GM22258 [Drosophila sechellia]  
[gb|EDW44165.1|](#)  GM22258 [Drosophila sechellia]  
Length=162

[GENE ID: 6616248 Dsec\GM22258](#) | GM22258 gene product from transcript GM22258-RA  
[Drosophila sechellia] (10 or fewer PubMed links)

Score = 87.1 bits (215), Expect = 6e-16, Method: Composition-based stats.  
Identities = 23/113 (20%), Positives = 46/113 (40%), Gaps = 9/113 (7%)

```
Query 21 VVLHYKSLGERDDTTELLTAGTFVGYSVILIALFAGYLLGNPLNKKL--DLFFSLIGCAM 78
+ + E+ E++ +G VG+ + + G +K D +++GC M
```

Sbjct 38 IGGTWNLNNEEKSAEIVASGVMVGFLLIYTGCHTIAFAFGTTKHKGELCDTIMNVVGCIM 97

Query 79 FIASGVLLILKEWENAWSTD-----TKKIAITKSSSLAVTNGVLFFFDAIFTF 124  
+IA G + L W+ + + + + + I SL V G L+ D +

Sbjct 98 WIAVGGVALHYWKGYMADEGFLYVNSERQVGIAMGSLCVIEGALYLLDVTVLAC 150

> [emb|CBE66942.1|](#) CG6981-PA [Drosophila ananassae]  
[emb|CBE66943.1|](#) CG6981-PA [Drosophila ananassae]  
[emb|CBE66944.1|](#) CG6981-PA [Drosophila ananassae]  
[9 more sequence titles](#)

[emb|CBE66945.1|](#) CG6981-PA [Drosophila ananassae]  
[emb|CBE66946.1|](#) CG6981-PA [Drosophila ananassae]  
[emb|CBE66947.1|](#) CG6981-PA [Drosophila ananassae]  
[emb|CBE66948.1|](#) CG6981-PA [Drosophila ananassae]  
[emb|CBE66949.1|](#) CG6981-PA [Drosophila ananassae]  
[emb|CBE66950.1|](#) CG6981-PA [Drosophila ananassae]  
[emb|CBE66951.1|](#) CG6981-PA [Drosophila ananassae]  
[emb|CBE66952.1|](#) CG6981-PA [Drosophila ananassae]  
[emb|CBE66953.1|](#) CG6981-PA [Drosophila ananassae]

Length=164

Score = 86.8 bits (214), Expect = 6e-16, Method: Composition-based stats.  
Identities = 25/112 (22%), Positives = 46/112 (41%), Gaps = 8/112 (7%)

Query 21 VVLHYKSLGERDDTTELLTAGTFVGYSVILIALFAGYLLGNPLNKKL-DLFFSLIGCAMF 79  
+ + E+ E++ +G VG+ + Y G +K L D +++G M+

Sbjct 41 IGGTWNLNNEEKSAEIVASGVMVGFLLIYTGCHTIAFAFGTTKHKGELCDTIMNVVGTIMW 100

Query 80 IASGVLLILKEWENAWSTD-----TKKIAITKSSSLAVTNGVLFFFDAIFTF 124

IA G + L W+ S + + + + I SL V G L+ D +

Sbjct 101 IAVGGVALHYWKGYMSDEGFLYVNSERQVGIAMGSLCVIEGALYLLDVTVLAC 152

> [ref|XP\\_001353299.1|](#)  GA20002 [Drosophila pseudoobscura pseudoobscura]  
[ref|XP\\_002021019.1|](#)  GL25117 [Drosophila persimilis]  
[gb|EAL30802.1|](#)  GA20002 [Drosophila pseudoobscura pseudoobscura]  
[gb|EDW40175.1|](#)  GL25117 [Drosophila persimilis]

Length=162

[GENE ID: 4813568 Dpse\GA20002](#) | GA20002 gene product from transcript GA20002-RA [Drosophila pseudoobscura pseudoobscura] (10 or fewer PubMed links)

Score = 86.8 bits (214), Expect = 7e-16, Method: Composition-based stats.  
Identities = 28/141 (19%), Positives = 53/141 (37%), Gaps = 23/141 (16%)

Query 7 SIVKFLELALAITCV-----VLHYKSLGERDDTTELLTAGTFVGYSVILIA 52

+K L+L + + + + + E+ E++ +G VG+ +

Sbjct 10 IFIKALKLIINLVIIIFLYRWGDGGEFLGIGGTWNLNNEEKSAEIVGSGVMVGFLLIYTG 69

Query 53 LFAGYLLGNPLNKKL--DLFFSLIGCAMFIASGVLLILKEWENAWSTD-----TKKIAI 103

Y G +K D +++GC M+IA G + L W+ S + + + + I

Sbjct 70 HTIAYAFGTTKHKGELCDTIMNVVGCIMWIAVGGVALHYWKGYMSDEGFLYVNSERQVGI 129

Query 104 TKSSLAVTNGVLFFFDAIFTF 124

SL V G L+ D +

Sbjct 130 AMGSLCVIEGALYLLDVTVLAC 150

> [ref|XP\\_976275.1|](#)  PREDICTED: similar to conserved hypothetical protein [Tribolium castaneum]

[gb|EFA08062.1|](#)  hypothetical protein TcasGA2\_TC005658 [Tribolium castaneum]

Length=325

[GENE ID: 658222 TcasGA2\\_TC005658](#) | hypothetical protein LOC658222 [Tribolium castaneum] (10 or fewer PubMed links)

Score = 86.8 bits (214), Expect = 7e-16, Method: Composition-based stats.

Identities = 37/146 (25%), Positives = 56/146 (38%), Gaps = 27/146 (18%)

```
Query 1 MAVS--RLSIVKFLELALAITCVVLHYKSLGER-----DDTTE 36
MA++ R +I+K LE+A I C+ + E D+
Sbjct 1 MAINFDRWTILKLLLEVASTIACLAFLKRVTDDEASRLFLYLQKLSREWRILNNVTDNVGA 60

Query 37 LLTAGTFVGYSVILIALFAGYLLGN-PLNKKLDLFFSL-IGCAMFIASGVLILKEWENAW 94
+ T+ GY +I ALF G L G P K++ F L +G +FI G L ++
Sbjct 61 AVADTTYGGYLIITTALFIGRLTGELPTQKRITEFVLLGVGTTLLFIILGSLEFAA-LDSV 119

Query 95 STDTKKIAITKSSLAVTNGVLFFFDA 120
D A +L + LF D
Sbjct 120 PEDLVDNAAVIGTTLTVTAALFLLDM 145
```

>  [ref|XP\\_002047884.1](#)  GJ13688 [Drosophila virilis]  
[gb|EDW70226.1](#)  GJ13688 [Drosophila virilis]  
Length=175

[GENE ID: 6624117 Dvir\GJ13688](#) | GJ13688 gene product from transcript GJ13688-RA [Drosophila virilis] (10 or fewer PubMed links)

Score = 86.4 bits (213), Expect = 8e-16, Method: Composition-based stats.  
Identities = 24/133 (18%), Positives = 50/133 (37%), Gaps = 13/133 (9%)

```
Query 6 LSIVKFLELALAITCVVLHYKSLGERD-----DTTELLTAGTFVGYSVILIALFAGYLL 59
L +K +EL L I C+ L + L TF ++ L
Sbjct 35 LISIKVVELCLLICLGLIDEPATNSHLRIFITPRVMALCYVTFGALAIYTAIYLIMALF 94

Query 60 GNPLNKKLDLFFSLIGCAMFIASGVLILKEWENAWSTDTK-----KIAITKSSLAVTN 112
G+ + +SL+G +F+A L+ ++W + + +S+++
Sbjct 95 GDLTPWRTATLWSLVGFVLFVAVTALLFRDWSTTKDRNYWHPNMHRLDLVMASASISLVT 154

Query 113 GVLFFFDIAIFTR 125
+++ D + T R
Sbjct 155 ALVYLDDVLLTIR 167
```

>  [ref|XP\\_002074415.1](#)  GK10529 [Drosophila willistoni]  
[gb|EDW85401.1](#)  GK10529 [Drosophila willistoni]  
Length=175

[GENE ID: 6651960 Dwil\GK10529](#) | GK10529 gene product from transcript GK10529-RA [Drosophila willistoni] (10 or fewer PubMed links)

Score = 86.0 bits (212), Expect = 1e-15, Method: Composition-based stats.  
Identities = 24/133 (18%), Positives = 52/133 (39%), Gaps = 13/133 (9%)

```
Query 6 LSIVKFLELALAITCVVLHYKSLGERD-----DTTELLTAGTFVGYSVILIALFAGYLL 59
L VK +EL L I C+ L + L+ TF ++ L
Sbjct 35 LICVKVELCLLICLGLIDEPATNSHLRVFITPRVMALSIVTFGALTIYTAIYLIMALF 94

Query 60 GNPLNKKLDLFFSLIGCAMFIASGVLILKEWENAWSTDTK-----KIAITKSSLAVTN 112
G+ + +L+G ++IA L+ ++W + + +S+++
Sbjct 95 GDLPPWRTSVLWALVGFVLYIAVTALLFRDWATTKDRNYWHPNMHRLDLVMASASISLVT 154

Query 113 GVLFFFDIAIFTR 125
+++ D + T R
Sbjct 155 ALVYLDDVLLTIR 167
```

>  [emb|CBE67045.1](#) CG6981-PA [Drosophila atripex]  
Length=164

Score = 86.0 bits (212), Expect = 1e-15, Method: Composition-based stats.  
Identities = 24/112 (21%), Positives = 46/112 (41%), Gaps = 8/112 (7%)

```
Query 21 VVLHYKSLGERDDTTELLTAGTFVGYSVILIALFAGYLLGNPLNKKL-DLFFSLIGCAMF 79
+ + E+ E++ +G VG+ + + G +K L D +++G M+
Sbjct 41 IGGTWNLNNEKSADAEIVASGVMVGFLLIYTGCHTIAFAFGTTKHKGLCDTIMNVVGTIMW 100
```

Query 80 IASGVILILKEWENAWSTD-----TKKIAITKSSLAVTNGVLFDDAIFTF 124  
IA G + L W+ S + +++ I SL V G L+ D +  
Sbjct 101 IAVGGVALHYWKGYMSDEGFLYVNSERQVGIAMGSLCVIEGALYLLDVTVLAC 152

>  [ref|XP\\_001948670.1](#)  PREDICTED: similar to CG13566 CG13566-PA, partial [Acyrtosiphon pisum]  
Length=439

[GENE ID: 100168034 LOC100168034](#) | similar to CG13566 CG13566-PA  
[Acyrtosiphon pisum]

Score = 86.0 bits (212), Expect = 1e-15, Method: Composition-based stats.  
Identities = 32/104 (30%), Positives = 52/104 (50%), Gaps = 4/104 (3%)

Query 25 YKSLGE--RDDTTELLTAGTFVGYSVILIALFAGYLLGNPLN-KKLDLFFSLIGCAMFIA 81  
+ L R+ L TF GY +I +AL+ YL+G N KK + F +IG A+FIA  
Sbjct 31 WPLLNNITRNGAGSLFADVTFGGYIIICVALYIAYLMGELKNSKKTESFLLVIGAALFIA 90

Query 82 SGVLILKEWENAWSTDTKKIAITKSSLAVTNGVLFDDAIFTFR 125  
G L+L ++ + A+ +L++ G++F D + R  
Sbjct 91 VGCLVLTAVDSVPGNLIVNALVLGTLISIVTGMVFLDTCLSNR 133

>  [ref|XP\\_002030493.1](#)  GM25471 [Drosophila sechellia]  
[gb|EDW41479.1](#)  GM25471 [Drosophila sechellia]  
Length=175

[GENE ID: 6605675 Dsec\GM25471](#) | GM25471 gene product from transcript GM25471-RA  
[Drosophila sechellia] (10 or fewer PubMed links)

Score = 86.0 bits (212), Expect = 1e-15, Method: Composition-based stats.  
Identities = 24/132 (18%), Positives = 49/132 (37%), Gaps = 13/132 (9%)

Query 7 SIVKFLELALAITCVLHYKSLGERD-----DTTELLTAGTFVGYSVILIALFAGYLLG 60  
+K +EL L I C+ L + L TF ++ L G  
Sbjct 36 ICIKIVELCLLICLGLIDEPATNSHLRVFITPRVASLCYVTFGALTIYTAIYLIMALFG 95

Query 61 NPLNKKLDLFFSLIGCAMFIASGVILILKEWENAWSTDTK-----KIAITKSSLAVTNG 113  
+ + ++L+G +F+A L+ ++W + + +S+A+  
Sbjct 96 DLTPWRTATLWNLVGFVLFVAVTALLFRDWSTTKDRNYWHPNMHRLDLVMSASIALVTS 155

Query 114 VLFFFDAIFTFR 125  
++F D + T R  
Sbjct 156 LVFLLDILITLR 167

>  [ref|XP\\_002084862.1](#)  GD14494 [Drosophila simulans]  
[gb|EDX10447.1](#)  GD14494 [Drosophila simulans]  
Length=175

[GENE ID: 6738047 Dsim\GD14494](#) | GD14494 gene product from transcript GD14494-RA  
[Drosophila simulans] (10 or fewer PubMed links)

Score = 85.6 bits (211), Expect = 1e-15, Method: Composition-based stats.  
Identities = 24/132 (18%), Positives = 49/132 (37%), Gaps = 13/132 (9%)

Query 7 SIVKFLELALAITCVLHYKSLGERD-----DTTELLTAGTFVGYSVILIALFAGYLLG 60  
+K +EL L I C+ L + L TF ++ L G  
Sbjct 36 ICIKIVELCLLICLGLIDEPATNSHLRVFITPRVASLCYVTFGALTIYTAIYLIMALFG 95

Query 61 NPLNKKLDLFFSLIGCAMFIASGVILILKEWENAWSTDTK-----KIAITKSSLAVTNG 113  
+ + ++L+G +F+A L+ ++W + + +S+A+  
Sbjct 96 DLTPWRTATLWNLVGFVLFVAVTALLFRDWSTTKDRNYWHPNMHRLDLVMSASIALVTS 155

Query 114 VLFFFDAIFTFR 125  
++F D + T R  
Sbjct 156 LVFLLDILITLR 167

> [ref|XP\\_002074859.1|](#)  GK19222 [Drosophila willistoni]

[gb|EDW85845.1|](#)  GK19222 [Drosophila willistoni]

Length=211

[GENE ID: 6652138 Dwil\GK19222](#) | GK19222 gene product from transcript GK19222-RA [Drosophila willistoni] (10 or fewer PubMed links)

Score = 85.6 bits (211), Expect = 2e-15, Method: Composition-based stats.  
Identities = 16/96 (16%), Positives = 27/96 (28%), Gaps = 1/96 (1%)

```
Query 6  LSIVKFLELALAITCVVLHYKSLGERDDTTELLTAGTFVGYSVILIALFAGYLLGN-PLN 64
      + K LEL L+ +H + L T+ G ++I G P
Sbjct 10  WLLFKVLELVLSGVGVCYVHIRCFQSEGTPHIFLLCATYGGSAIICALSIIGMFYAEKPTM 69

Query 65  KKLDLFFSLIGCAMFIASGVLILKEWENAWSTDTKK 100
      K L+G + + + K
Sbjct 70  KLEAAISGLLGLTLMHMLTVYANMYLAEHDIELMFLKN 105
```

> [ref|XP\\_002043968.1|](#)  GM13685 [Drosophila sechellia]

[gb|EDW51256.1|](#)  GM13685 [Drosophila sechellia]

Length=247

[GENE ID: 6619754 Dsec\GM13685](#) | GM13685 gene product from transcript GM13685-RA [Drosophila sechellia] (10 or fewer PubMed links)

Score = 85.6 bits (211), Expect = 2e-15, Method: Composition-based stats.  
Identities = 36/92 (39%), Positives = 54/92 (58%), Gaps = 1/92 (1%)

```
Query 35  TELLTAGTFVGYSVILIALFAGYLLGNPLNKKLDLFFSLIGCAMFIASGVLILKEWENA- 93
      ++ AGT GY+VI L G++L + + K+L+ FSLIGC +F+ASG L++ EW
Sbjct 155  HPVIVAGTVGGYTVICGVLIGHVLSLVEKRLNALFSLIGCLLFVASGALVIDEWHGGL 214

Query 94  WSTDTKKIAITKSSSLAVTNGVLFDDAIFTFR 125
      +TD K+ AI SL + N +F D + R
Sbjct 215  LNTDRKRQAIGAGSLMIINA AVFLDLTLCICR 246
```

Score = 71.0 bits (173), Expect = 3e-11, Method: Composition-based stats.  
Identities = 31/133 (23%), Positives = 60/133 (45%), Gaps = 20/133 (15%)

```
Query 1  MAVSRLSIVKFLELALAITCVVLHYKSLGERDDTTELLTAGTFVGYSVILIAL----- 53
      M + ++K +EL +T ++L LL GT +GY + +
Sbjct 1  MEFNRRLLKIIELVFIVTSIILIESISDLTFIRQALLVHGTLMGYLITCFVIATGKSQD 60

Query 54  -----FAGYLLGNPLNKKLDLFFSLIGCAMFIASGVLILKEWENA-WSTDTKK 100
      F+G++ G ++K+LD+ FS+ G +F A+G +IL +W S + ++
Sbjct 61  ASNLAPVYEMDMFSGHVSQVTVVDRKRLDILFSIGGFLLFGAAGTIIILAQWLGYSQEQERE 120

Query 101 IAITKSSSLAVTNG 113
      + + L++ NG
Sbjct 121  VLLASGILSLANG 133
```

> [ref|XP\\_001354994.2|](#)  GA20224 [Drosophila pseudoobscura pseudoobscura]

[gb|EAL32050.2|](#) GA20224 [Drosophila pseudoobscura pseudoobscura]

Length=228

[GENE ID: 4815142 Dpse\GA20224](#) | GA20224 gene product from transcript GA20224-RA [Drosophila pseudoobscura pseudoobscura] (10 or fewer PubMed links)

Score = 85.2 bits (210), Expect = 2e-15, Method: Composition-based stats.  
Identities = 33/90 (36%), Positives = 53/90 (58%), Gaps = 1/90 (1%)

```
Query 37  LLTAGTFVGYSVILIALFAGYLLGNPLNKKLDLFFSLIGCAMFIASGVLILKEWENAWST 96
      L+ GT G+++I L G+++ + + K+L+ SLIGC +F+ASG L++ EW +A
Sbjct 138  LIVCGTIGGFTHICGVLIGHVINSLVEKRLNALISLIGCILFVASGALVIDEWHDAVLQ 197

Query 97  -DTKKIAITKSSSLAVTNGVLFDDAIFTFR 125
```

Sbjct 198 D K+ AI SL + NG +F D + R  
KDRKRNAIAAGSLMIINGAVFLDLSICR 227

Score = 82.9 bits (204), Expect = 1e-14, Method: Composition-based stats.  
Identities = 32/114 (28%), Positives = 59/114 (51%), Gaps = 1/114 (0%)

Query 1 MAVSRLSIVKFLELALAITCVVLHYKSLGERDDTTELLTAGTFVGYSVILIALFAGYLLG 60  
M + ++K +EL T ++L R + +L GT GY++I L G+L+G  
Sbjct 1 MEFNNRLLKIIELTFIATSIIILIESVADHRYSSQAMLVCGTLTGAIICATLGIGHLVG 60  
Query 61 NPLNKKLDLFFSLIGCAMFIASGVLILKEWENAWSTDT-KKIAITKSSLAVTNG 113  
++K++D+ FS+ +FIASG +IL W + + ++ K + + + NG  
Sbjct 61 ANIDKRIDVLFVAAVILFIASGAVILDRWLDVYEVEDSKNSVLAALAAIFCLANG 114

>  [ref|XP\\_001984986.1|](#)  GH14752 [Drosophila grimshawi]  
[gb|EDV97334.1|](#)  GH14752 [Drosophila grimshawi]  
Length=175

[GENE ID: 6556977 Dgri\GH14752](#) | GH14752 gene product from transcript GH14752-RA  
[Drosophila grimshawi] (10 or fewer PubMed links)

Score = 85.2 bits (210), Expect = 2e-15, Method: Composition-based stats.  
Identities = 23/133 (17%), Positives = 50/133 (37%), Gaps = 13/133 (9%)

Query 6 LSIVKFLELALAITCVVLHYKSLGERD-----DTTELLTAGTFVGYSVILIALFAGYLL 59  
L +K +EL L I C+ L + L TF ++ L  
Sbjct 35 LITIKVVELCLLICLGLIDEPATNSQLRVFITPRVMALCYVTFGALAIYTAIYLIMALF 94  
Query 60 GNPLNKKLDLFFSLIGCAMFIASGVLILKEWENAWSTDTK-----KIAITKSSLAVTN 112  
G+ + +SL+G +++A L+ ++W + + +S+++  
Sbjct 95 GDLSWPRTATLWSLVGFVLYVAVTALLFQDWSTTKDRNYWHPNMHRLDLVMASASISLVT 154  
Query 113 GVLFFFDAIFTFR 125  
+++ D + T R  
Sbjct 155 ALVYLLDVLLTIR 167

>  [ref|XP\\_002075211.1|](#)  GK16752 [Drosophila willistoni]  
[gb|EDW86197.1|](#)  GK16752 [Drosophila willistoni]  
Length=206

[GENE ID: 6652874 Dwil\GK16752](#) | GK16752 gene product from transcript GK16752-RA  
[Drosophila willistoni] (10 or fewer PubMed links)

Score = 84.8 bits (209), Expect = 2e-15, Method: Composition-based stats.  
Identities = 38/112 (33%), Positives = 62/112 (55%), Gaps = 3/112 (2%)

Query 15 ALAITCVVLHYKSLGERDDTTELLTAGTFVGYSVILIALFAGYLLGNPLNKKLDLFFSLI 74  
A+AI C+V++ L+ GT G+++I L G+++ + + K+L+ SLI  
Sbjct 96 AIAIACIVMYEVDGALSSRP--LIVCGTIGGFIAICGVLLIGHVINSLVEKRLNALISLI 153  
Query 75 GCAMFIASGVLILKEWENAWST-DTKKIAITKSSLAVTNGVLFFFDAIFTFR 125  
GC +F+ASG L++ EW +A D K+ AI SL + NG +F D + R  
Sbjct 154 GCILFVASGALVIDEWHDALLQDKRKRNAIAAGSLMIINGAVFLDLSICR 205

Score = 77.1 bits (189), Expect = 5e-13, Method: Composition-based stats.  
Identities = 29/96 (30%), Positives = 55/96 (57%), Gaps = 0/96 (0%)

Query 1 MAVSRLSIVKFLELALAITCVVLHYKSLGERDDTTELLTAGTFVGYSVILIALFAGYLLG 60  
M + ++K +ELA +T ++L + +L GT GY++I L G+LLG  
Sbjct 1 MEFNNRLLKIIELAFMTSIIILIESVADHSYSSQAMLICGTLTGTYIICATLALGHLLG 60  
Query 61 NPLNKKLDLFFSLIGCAMFIASGVLILKEWENAWST 96  
+++++D+ F++ GC +FI+SG +IL W +++  
Sbjct 61 AKVDRRIDILFAVAGCILFISSGAIILDRWLGSFTA 96

> [ref|XP\\_002022417.1](#)  GL13023 [Drosophila persimilis]

[gb|EDW26452.1](#)  GL13023 [Drosophila persimilis]

Length=228

[GENE ID: 6597409 Dper\GL13023](#) | GL13023 gene product from transcript GL13023-RA [Drosophila persimilis] (10 or fewer PubMed links)

Score = 84.8 bits (209), Expect = 2e-15, Method: Composition-based stats.  
Identities = 33/90 (36%), Positives = 53/90 (58%), Gaps = 1/90 (1%)

```
Query 37 LLTAGTFVGYSVILIALFAGYLLGNPLNKLDLFFSLIGCAMFIASGVILILKEWENAWST 96
          L+ GT G+++I L G+++ + + K+L+ SLIGC +F+ASG L++ EW +A
Sbjct 138 LIVCGTIGGFTIICGVLLIGHVINSLVKRLNALISLIGCILFVASGALVIDEWHDAVLQ 197

Query 97 -DTKKIAITKSSLAVTNGVLFDDAIFTFR 125
          D K+ AI SL + NG +F D + R
Sbjct 198 KDRKRNAIAAGSLMIINGAVFLDLSICR 227
```

Score = 82.1 bits (202), Expect = 2e-14, Method: Composition-based stats.  
Identities = 32/114 (28%), Positives = 59/114 (51%), Gaps = 1/114 (0%)

```
Query 1 MAVSRLSIVKFLELALAITCVVLHYKSLGERDDTTELLTAGTFVGYSVILIALFAGYLLG 60
          M + ++K +EL T ++L R + +L GT GY++I L G+L+G
Sbjct 1 MEFNNRLLLKIIELTFIATSIIILIESVADHRYSSQAMLVCGTLTGAIICATLGIGHLVG 60

Query 61 NPLNKKLDLFFSLIGCAMFIASGVILILKEWENAWSTDT-KKIAITKSSLAVTNG 113
          ++K++D+ FS+ +FIASG +IL W + + ++ K + + + NG
Sbjct 61 ANIDKRIDVLFVAAVILFIASGAVILDRWLDVYEIESDKNSVLAAAIFCLANG 114
```

> [ref|XP\\_001986174.1](#)  GH21210 [Drosophila grimshawi]

[gb|EDW01041.1](#)  GH21210 [Drosophila grimshawi]

Length=195

[GENE ID: 6559580 Dgri\GH21210](#) | GH21210 gene product from transcript GH21210-RA [Drosophila grimshawi] (10 or fewer PubMed links)

Score = 84.8 bits (209), Expect = 2e-15, Method: Composition-based stats.  
Identities = 14/130 (10%), Positives = 36/130 (27%), Gaps = 11/130 (8%)

```
Query 6 LSIVKFLELALAITCVVLHYKSLGERDDTTELLTAGTFV-GYSVILIALFAGYLLGNPLN 64
          + K LE L+ C +H K + T+ G + ++ + +
Sbjct 10 WLLFKLELETILSSICCVVHKCFESDGVDPDIFILCATYSGSGCVIGILGILCSFFTLKLN 69

Query 65 KKLDLFFSLIGCAMFIASGVILILKEWENAWSTDTKKI-----AITKSSLAVTNGV 114
          + ++G + + K T ++L++
Sbjct 70 TTEAITSGVLGSLHLFTVYAHMYLAEHDKLLAFFKDHEKDSYGFLCCCQTNATLSLYAVA 129

Query 115 LFFFDAIFTF 124
          +++ F
Sbjct 130 VYYLHCNFAL 139
```

> [ref|XP\\_001972737.1](#)  GG15688 [Drosophila erecta]

[gb|EDV51763.1](#)  GG15688 [Drosophila erecta]

Length=175

[GENE ID: 6545924 Dere\GG15688](#) | GG15688 gene product from transcript GG15688-RA [Drosophila erecta] (10 or fewer PubMed links)

Score = 84.4 bits (208), Expect = 3e-15, Method: Composition-based stats.  
Identities = 23/132 (17%), Positives = 49/132 (37%), Gaps = 13/132 (9%)

```
Query 7 SIVKFLELALAITCVVLHYKSLGERD-----DTTELLTAGTFVGYSVILIALFAGYLLG 60
          +K +EL L I C+ L + L TF ++ L G
Sbjct 36 ICIKIVELCLLCLGLIDEPATNSHLRVFITPRVASLCYVTFGALTIYTAIYLIMALFG 95

Query 61 NPLNKKLDLFFSLIGCAMFIASGVILILKEWENAWSTDTK-----KIAITKSSLAVTNG 113
          + + ++L+G +F+A L+ ++W + + +S+++
```



Sbjct 96 DMTPWRTTTLWNLVGFVLFVAVTALLFRDWSTTKDRNYWHPNMHRLDLVMSASISLVTS 155

Query 114 VLFFFDAIFTFR 125  
++F D + T R

Sbjct 156 LVFLLDILITLR 167

>  [ref|XP\\_001956408.1](#)  GF24609 [Drosophila ananassae]

[gb|EDV39214.1](#)  GF24609 [Drosophila ananassae]  
Length=175

[GENE ID: 6507240 Dana\GF24609](#) | GF24609 gene product from transcript GF24609-RA [Drosophila ananassae] (10 or fewer PubMed links)

Score = 84.4 bits (208), Expect = 3e-15, Method: Composition-based stats.  
Identities = 24/133 (18%), Positives = 50/133 (37%), Gaps = 13/133 (9%)

Query 6 LSIVKFLELALAITCVVLHYKSLGERD-----DTTELLTAGTFVGYSVILIALFAGYLL 59  
L +K +EL L I C+ L + L TF ++ L

Sbjct 35 LICIKVVELCLLICCLGLIDEPATNSHLRVFITPRVMALCYVTFGALAIYTAIYLIMALF 94

Query 60 GNPLNKKLDLFFSLIGCAMFIASGVILILKEWENAWSTDTK-----KIAITKSSLAVTN 112  
G+ + ++L+G +F+A L+ ++W + + +S+++

Sbjct 95 GDMPWRTATLWALVGFCLFVAVTALLFRDWSTTKDRNYWHPNMHRLDLVMSASISLV 154

Query 113 GVLFFFDAIFTFR 125  
++F D + T R

Sbjct 155 SLVFLLDILITIR 167

>  [ref|XP\\_001843280.1](#)  conserved hypothetical protein [Culex quinquefasciatus]

[gb|EDS31782.1](#)  conserved hypothetical protein [Culex quinquefasciatus]  
Length=148

[GENE ID: 6032733 CpipJ\\_CPIJ001382](#) | hypothetical protein [Culex quinquefasciatus]

Score = 84.1 bits (207), Expect = 4e-15, Method: Composition-based stats.  
Identities = 28/134 (20%), Positives = 48/134 (35%), Gaps = 13/134 (9%)

Query 5 RLSIVKFLELALAITCVVLHYKSLGER-----DDTELLTAGTFVGYSVILIALFAGYLL 58  
L+ L A+AI C+ L T L TFV + + + G +

Sbjct 7 NLAFYYALGNAVAIICIGLIDDPANNSRFRVFLATRTASLAYSTFVPFLIFSVIYLFQKV 66

Query 59 LGNPLNKKLDLFFSLIGCAMFIASGVILILKEWENAW-----STDTKKIAITKSSLAVT 111  
+ + KL +L +++AS IL +W +T ++AV

Sbjct 67 IRENIPWKLQSLNLTAFILYLASAACILNDWSETKTRNYWPPNTQRMDYMCAGAVAVI 126

Query 112 NGVLFFFDAIFTFR 125  
+++ D I T R

Sbjct 127 GALIYLLDLIVTVR 140

>  [ref|XP\\_002094795.1](#)  GE22019 [Drosophila yakuba]

[gb|EDW94507.1](#)  GE22019 [Drosophila yakuba]  
Length=175

[GENE ID: 6534109 Dyak\GE22019](#) | GE22019 gene product from transcript GE22019-RA [Drosophila yakuba] (10 or fewer PubMed links)

Score = 84.1 bits (207), Expect = 5e-15, Method: Composition-based stats.  
Identities = 22/132 (16%), Positives = 48/132 (36%), Gaps = 13/132 (9%)

Query 7 SIVKFLELALAITCVVLHYKSLGERD-----DTTELLTAGTFVGYSVILIALFAGYLLG 60  
+K +EL L I C+ L + L TF ++ L G

Sbjct 36 ICIKIVELCLLICCLGLIDEPATNSHLRVFITPRVASLCYVTFGALTIYTAIYLIMALFG 95

Query 61 NPLNKKLDLFFSLIGCAMFIASGVILILKEWENAWSTDTK-----KIAITKSSLAVTNG 113  
+ + ++L+ +F+A L+ ++W + + +S+A+

Sbjct 96 DLTPWRTATLWNLVAFVLFVAVTALLFRDWSTTKDRNYWHPNMHRLDLVMSASIALVTS 155

Query 114 VLFFFDIAIFTFR 125  
+++ D + T R  
Sbjct 156 LVYLLDILITLR 167

> [ref|XP\\_002027022.1|](#) **G** GL21019 [Drosophila persimilis]  
[gb|EDW34837.1|](#) **G** GL21019 [Drosophila persimilis]  
Length=175

[GENE ID: 6601975 Dper\GL21019](#) | GL21019 gene product from transcript GL21019-RA [Drosophila persimilis] (10 or fewer PubMed links)

Score = 83.7 bits (206), Expect = 5e-15, Method: Composition-based stats.  
Identities = 23/133 (17%), Positives = 50/133 (37%), Gaps = 13/133 (9%)

Query 6 LSIVKFLELALAITCVVLHYKSLGERD-----DTTELLTAGTFVGYSVILIALFAGYLL 59  
L +K +EL L I C+ L + L TF ++ L+  
Sbjct 35 LICIKVVELCLLICLGLIDEPATNSHLRVFITPRVIALCYVTFGALTIYTAIYLIMALV 94

Query 60 GNPLNKKLDLFFSLIGCAMFIASGVILILKEWENAWSTDTK-----KIAITKSSLAVTN 112  
G+ + +SL+ +++A L+ ++W + + +S+A+  
Sbjct 95 GD LTPWRTATLWSLVAFCLYVAVTALLFRDWSTTKDRNYWHPNMHRLDLVMASASIALVT 154

Query 113 GVLFFFDIAIFTFR 125  
+++ D + T R  
Sbjct 155 SLVYLLDILLTIR 167

> [ref|XP\\_002007920.1|](#) **G** GI13205 [Drosophila mojavensis]  
[gb|EDW18396.1|](#) **G** GI13205 [Drosophila mojavensis]  
Length=232

[GENE ID: 6582216 Dmoj\GI13205](#) | GI13205 gene product from transcript GI13205-RA [Drosophila mojavensis] (10 or fewer PubMed links)

Score = 83.7 bits (206), Expect = 6e-15, Method: Composition-based stats.  
Identities = 20/131 (15%), Positives = 47/131 (35%), Gaps = 12/131 (9%)

Query 6 LSIVKFLELALAITCVVLH-YKSLGERDDTTELLTAGTFVGYSVILIALFAGYLLGNPLN 64  
K LE+ C +H +L E + + GTFVG+ ++ A ++G  
Sbjct 5 WLFFKLELILAGSACTYVHRMGTLQEEPISHNMFFCGTFVGFVLLAAIHCARLVMGLRTL 64

Query 65 KKLDLFFSLIGCAMFIASGVILIL-KEWENAWSTDTKIAITK-----SSLAVTNG 113  
+ LF S++G M + ++ + ++ + S +++  
Sbjct 65 LRPLLFISVLGFCMHVLCALVSMGFAEKDFHLQFMSDVGENSHNYFRECRLQSIISMVTA 124

Query 114 VLFFFDIAIFTF 124  
++ + +  
Sbjct 125 GIYLIEGVLVL 135

> [ref|NP\\_729982.1|](#) **UG** CG9628, isoform B [Drosophila melanogaster]  
[ref|NP\\_001163442.1|](#) **G** CG9628, isoform C [Drosophila melanogaster]  
[gb|AAF49725.2|](#) **G** CG9628, isoform B [Drosophila melanogaster]  
[gb|AAN71160.1|](#) **G** GH08457p [Drosophila melanogaster]  
[gb|ACL92658.1|](#) CG9628-PA [synthetic construct]  
[gb|ACZ94713.1|](#) **G** CG9628, isoform C [Drosophila melanogaster]  
Length=175

[GENE ID: 39593 CG9628](#) | CG9628 gene product from transcript CG9628-RA [Drosophila melanogaster] (10 or fewer PubMed links)

Score = 83.7 bits (206), Expect = 6e-15, Method: Composition-based stats.  
Identities = 23/132 (17%), Positives = 48/132 (36%), Gaps = 13/132 (9%)

Query 7 SIVKFLELALAITCVVLHYKSLGERD-----DTTELLTAGTFVGYSVILIALFAGYLLG 60  
+K +EL L I C+ L + L TF ++ L G

Sbjct 36 ICIKIVELCLLICCLGLIDEPATNSHLRVFITPRVASLCYVTFGALTIYTAIYLIMALFG 95  
Query 61 NPLNKKLDLFFSLIGCAMFIASGVLILKEWENAWSTDTK-----KIAITKSSLAVTNG 113  
+ + ++L+ +F+A L+ ++W + + +S+A+  
Sbjct 96 DLTPWRTATLWNLVAFVLFVAVTALLFRDWSTTKDRNYWHPNMHRLDLVMASASIALVTS 155  
Query 114 VLFFFDAIFTFR 125  
++F D + T R  
Sbjct 156 LVFLDLITLR 167

> [ref|NP\\_648710.1](#)  CG9628, isoform A [Drosophila melanogaster]  
[gb|AAF49726.1](#)  CG9628, isoform A [Drosophila melanogaster]  
[gb|AAL28716.1](#)  LD13706p [Drosophila melanogaster]  
[gb|ACL83885.1](#) CG9628-PA [synthetic construct]  
[gb|ACL89005.1](#) CG9628-PA [synthetic construct]  
Length=162

[GENE ID: 39593 CG9628](#) | CG9628 gene product from transcript CG9628-RA [Drosophila melanogaster] (10 or fewer PubMed links)

Score = 82.9 bits (204), Expect = 1e-14, Method: Composition-based stats.  
Identities = 23/132 (17%), Positives = 48/132 (36%), Gaps = 13/132 (9%)

Query 7 SIVKFLELALAITCVVLHYKSLGERD-----DTTELLTAGTFVGYSVILIALFAGYLLG 60  
+K +EL L I C+ L + L TF ++ L G  
Sbjct 23 ICIKIVELCLLICCLGLIDEPATNSHLRVFITPRVASLCYVTFGALTIYTAIYLIMALFG 82  
Query 61 NPLNKKLDLFFSLIGCAMFIASGVLILKEWENAWSTDTK-----KIAITKSSLAVTNG 113  
+ + ++L+ +F+A L+ ++W + + +S+A+  
Sbjct 83 DLTPWRTATLWNLVAFVLFVAVTALLFRDWSTTKDRNYWHPNMHRLDLVMASASIALVTS 142  
Query 114 VLFFFDAIFTFR 125  
++F D + T R  
Sbjct 143 LVFLDLITLR 154

> [gb|EFA08060.1](#) hypothetical protein TcasGA2\_TC005656 [Tribolium castaneum]  
Length=1071

Score = 82.9 bits (204), Expect = 1e-14, Method: Composition-based stats.  
Identities = 19/120 (15%), Positives = 39/120 (32%), Gaps = 11/120 (9%)

Query 9 VKFLELALAITCVVL---HYKSLGERDDTTELLTAGTFVGYSVILIALFAGYLLGNPLNK 65  
V+ +E L + C+ L + + ++L T + +I + P+  
Sbjct 22 VRVVEAVLCLVCIALAAAIDVKIHMHIAFKILLTFTAAAFVVIITVYDVIATSYPRIYW 81  
Query 66 KLDLFFSLIGCAMFIASGVLILKEWENAWSTDTKKIAITKSSLA-VTNGVLFFFDAIFTF 124  
F++ G F LI+ T + + +A ++F D I  
Sbjct 82 NAWTLFTITGALFFFLGVGLIIA-----TGFGHVLLILGVVAVYAVTAIIFLLDTILIL 134

> [ref|XP\\_001353700.2](#)  GA21923 [Drosophila pseudoobscura pseudoobscura]  
[gb|EAL29433.2](#) GA21923 [Drosophila pseudoobscura pseudoobscura]  
Length=175

[GENE ID: 4813692 Dpse\GA21923](#) | GA21923 gene product from transcript GA21923-RA [Drosophila pseudoobscura pseudoobscura] (10 or fewer PubMed links)

Score = 82.1 bits (202), Expect = 2e-14, Method: Composition-based stats.  
Identities = 22/133 (16%), Positives = 50/133 (37%), Gaps = 13/133 (9%)

Query 6 LSIVKFLELALAITCVVLHYKSLGERD-----DTTELLTAGTFVGYSVILIALFAGYLL 59  
L +K +EL L I C+ L + L TF ++ L+  
Sbjct 35 LICIKVVELCLLICCLGLIDEPATNSHLRVFITPRVIALCYVTFGALTIYTAIYLIMALV 94  
Query 60 GNPLNKKLDLFFSLIGCAMFIASGVLILKEWENAWSTDTK-----KIAITKSSLAVTN 112  
G+ + +SL+ +++A L+ ++W + + +S+A+  
Sbjct 95 GDLPWRTATLWSLVAFCLYVAVTALLFRDWSTTKDRNYWHPNMHRLDLVMASASIALVT 154

Query 113 GVLFFFDAIFTFR 125  
+++ + + T R  
Sbjct 155 SLVYLLEILLTIR 167

> [ref|NP\\_001156315.1|](#) **UG** hypothetical protein LOC100169413 [Acyrtosiphon pisum]  
[dbj|BAH71620.1|](#) **G** ACYPI010034 [Acyrtosiphon pisum]  
Length=160

[GENE ID: 100169413 Acypi010034](#) | similar to ryanodine receptor-like protein [Acyrtosiphon pisum]

Score = 82.1 bits (202), Expect = 2e-14, Method: Composition-based stats.  
Identities = 29/113 (25%), Positives = 51/113 (45%), Gaps = 9/113 (7%)

Query 21 VVLHYKSLGERDDTTELLTAGTFVGYSVILIALFAGYLLGNPLNKKL--DLFFSLIGCAM 78  
V + E++ E++ +G FVG+ + + + Y G+ KK D+ + +G M  
Sbjct 38 VGGTWNLNEEKNPDAEIVASGVFVGGFFIYTVVILISYGFSGSNHQKTLVDIIMNFVGMFM 97

Query 79 FIASGVLILKEWENAS-----TDTKKIAITKSSLAVTNGVLEFFDAIFTF 124  
FIA G + L W + T + I IT L V +G ++ D + +F  
Sbjct 98 FIAVGGIALHYWIGYQENKYISVTSERAIGITVGVLCVISGAIYLVDTVLSF 150

> [ref|XP\\_001977381.1|](#) **G** GG19007 [Drosophila erecta]  
[gb|EDV46308.1|](#) **G** GG19007 [Drosophila erecta]  
Length=228

[GENE ID: 6549905 Dere\GG19007](#) | GG19007 gene product from transcript GG19007-RA [Drosophila erecta] (10 or fewer PubMed links)

Score = 81.0 bits (199), Expect = 3e-14, Method: Composition-based stats.  
Identities = 35/92 (38%), Positives = 54/92 (58%), Gaps = 1/92 (1%)

Query 35 TELLTAGTFVGYSVILIALFAGYLLGNPLNKKLDLFFSLIGCAMFIASGVLILKEWENA- 93  
++ AGT GY+VI L G+++ + + K+L+ FSLIGC +F+ASG L++ EW  
Sbjct 136 HPVIVAGTVGGYTVICGVLLVGHVNSLVEKRLNALFSLIGCLLFVASGALVIDEWHGGL 195

Query 94 WSTDTKKIAITKSSLAVTNGVLEFFDAIFTFR 125  
+TD K+ AI SL + N +F D + R  
Sbjct 196 LNTDRKRQAIGAGSLMIINA AVFLLDTLICICR 227

Score = 75.6 bits (185), Expect = 2e-12, Method: Composition-based stats.  
Identities = 31/114 (27%), Positives = 58/114 (50%), Gaps = 1/114 (0%)

Query 1 MAVSRLSIVKFLELALAITCVVLHYKSLGERDDTTELLTAGTFVGYSVILIALFAGYLLG 60  
M + ++K +EL +T ++L +L GT VGY + + G+L G  
Sbjct 1 MEFNRRLLKIIELVFIMTSIILIESVSELA FIRQAMLVHGTLVGYLITCSVIATGHLGG 60

Query 61 NPLNKKLDLFFSLIGCAMFIASGVLILKEWE-NAWSTDTKKIAITKSSLAVTNG 113  
++K+LD+ FS+ G +F A+G +IL +W + S + ++ + L++ NG  
Sbjct 61 IVVDKRLDIIFSIGGFILFGATGTIILAQWLAHCKSQEEWEMLLVSGILSLANG 114

> [ref|XP\\_002101085.1|](#) **G** GE17420 [Drosophila yakuba]  
[gb|EDX02193.1|](#) **G** GE17420 [Drosophila yakuba]  
Length=230

[GENE ID: 6525248 Dyak\GE17420](#) | GE17420 gene product from transcript GE17420-RA [Drosophila yakuba] (10 or fewer PubMed links)

Score = 81.0 bits (199), Expect = 4e-14, Method: Composition-based stats.  
Identities = 34/95 (35%), Positives = 55/95 (57%), Gaps = 3/95 (3%)

Query 34 TELLTAGTFVGYSVILIALFAGYLLGNPLNKKLDLFFSLIGCAMFIASGVLILKEWENA 93  
+ ++ AGT GY+VI L G+++ + + K+L+ FSLIGC +F+ASG +++ EW  
Sbjct 135 SHAVIVAGTIGGYTVICGVLLVGHVINSLVEKRLNALFSLIGCLLFVASGAMVIDEWHGG 194

Query 94 WS---TDTKKIAITKSSLAVTNGVLEFFDAIFTFR 125

+ TD K+ AI SL + N +F D + R  
Sbjct 195 VNIITDRKRQAIGAGSLMIINA AVFLDLTLCICR 229

Score = 76.0 bits (186), Expect = 1e-12, Method: Composition-based stats.  
Identities = 29/114 (25%), Positives = 55/114 (48%), Gaps = 1/114 (0%)

Query 1 MAVSRLSIVKFLELALAITCVVLHYKSLGERDDTTELLTAGTFVGYSVILIALFAGYLLG 60  
M + ++K +EL + + L LL GT +GY + + G+++G  
Sbjct 1 MEFNNRLLKIIELVFIVASITLIEGIADLTFIRQALLVHGTLLIGYLITCFVIATGHVVG 60  
Query 61 NPLNKKLDLFFSLIGCAMFIASGVLILKEWENA-WSTDTKKIAITKSSLAVTNG 113  
++K+LD+ FS+ G +F A+G +IL +W S + + + L++ NG  
Sbjct 61 TAVDKQLDILFSIGGFILFGATGTIILAQWLEYCKSQVERDVVLASGILSLANG 114

> [ref|XP\\_966339.1|](#) **UG** PREDICTED: similar to ryanodine receptor-like protein [Tribolium castaneum]

[gb|EFA08057.1|](#) **G** hypothetical protein TcasGA2\_TC005653 [Tribolium castaneum]  
Length=158

[GENE ID: 657157 TcasGA2\\_TC005653](#) | similar to ryanodine receptor-like protein [Tribolium castaneum] (10 or fewer PubMed links)

Score = 80.6 bits (198), Expect = 5e-14, Method: Composition-based stats.  
Identities = 19/113 (16%), Positives = 43/113 (38%), Gaps = 9/113 (7%)

Query 21 VVLHYKSLGERDDTTELLTAGTFVGYSVILIALFAGYLLGNPLNKK--LDLFFSLIGCAM 78  
V + E++ E++ +G FVG Y + +K D+ ++IG +  
Sbjct 38 VGGTWNLNNEEKNPDAEIVASGIFVGYFIYTCVSIISLCFATADHKNTFTDILMNIIGVFL 97  
Query 79 FIASGVLILKEWENAWS-----TDTKKIAITKSSLAVTNGVLEFFDAIFTF 124  
++A G + W +++ + +L + NG + D + +  
Sbjct 98 WVAIGATAIHYSWGYLLEHKYQTTASEREVGLAMGALCILNGAAYLIDTVLSV 150

> [ref|XP\\_002430041.1|](#) **G** conserved hypothetical protein [Pediculus humanus corporis]

[gb|EEB17303.1|](#) **G** conserved hypothetical protein [Pediculus humanus corporis]  
Length=143

[GENE ID: 8238407 Phum\\_PHUM460340](#) | hypothetical protein [Pediculus humanus corporis]

Score = 78.7 bits (193), Expect = 2e-13, Method: Composition-based stats.  
Identities = 30/132 (22%), Positives = 53/132 (40%), Gaps = 14/132 (10%)

Query 8 IVKFLELALAITCVVLHYKSLGER----DDTTELLTAGTFVGYSVILIALFAGYLLGNPL 63  
I+K +EL LAI V L + + + ++ Y +I L ++ G +  
Sbjct 10 ILKLIELCLAIIVAGLIVDPINNGVLSFNHNHSGIVVSWPSYIIINTILLISFVAGERI 69  
Query 64 NKKLDLFFSLIGCAMFIASGVLILKEWENAWSTD-----TKKIAITKSSLAVTNG 113  
K + FS IG +F+A+ + L+ W S + +I LA+  
Sbjct 70 PKITQVLFSPFSGCLFVAAAASLENWRKHSGEINLLKMNQVQYSDQSIASGILALFCA 129  
Query 114 VLFFFDAIFTFR 125  
+ FF D + T +  
Sbjct 130 LTFFIDTVITLK 141

> [ref|XP\\_001357214.2|](#) **G** GA12689 [Drosophila pseudoobscura pseudoobscura]

[gb|EAL34283.2|](#) GA12689 [Drosophila pseudoobscura pseudoobscura]  
Length=461

[GENE ID: 4818054 Dpse\GA12689](#) | GA12689 gene product from transcript GA12689-RA [Drosophila pseudoobscura pseudoobscura] (10 or fewer PubMed links)

Score = 77.9 bits (191), Expect = 3e-13, Method: Composition-based stats.  
Identities = 19/137 (13%), Positives = 40/137 (29%), Gaps = 22/137 (16%)

Query 6 LSIVKFLELALAITCVVLHYKSLG--ERDDTTELLTAGTFVGYSVILIALFAGYLLGNPL 63

```

      K +E+ L  C+  H +          +L  TF  Y+++          LL
Sbjct  5  WVFFKLLIEVFLGSIKMGFHVVEGSMYWPEPIPHIILYCATFGSYTLAALGAFRLLKSS  64
Query  64  NKKLDLFFSLIGCAMFIASGVLILK-----EWENAWSTDTKKIAITKSS  107
      +L  +      +  G+L+++          E+      K+  +I
Sbjct  65  ILSSELLLAASAMGLHYFCGLLVMRSARQDKHLSAMNSTWQYLEHPHFARCKRQSIG---  121
Query  108  LAVTNGVLFFFDAIFTF  124
      A+  G  ++
Sbjct  122  -ALITGTMYLMHMFLLL  137

```

>  [gb|ACN94686.1](#) GA12689 [Drosophila miranda]  
Length=462

Score = 77.9 bits (191), Expect = 3e-13, Method: Composition-based stats.  
Identities = 19/137 (13%), Positives = 40/137 (29%), Gaps = 22/137 (16%)

```

Query  6  LSIVKFLELALAITCVLHYKSLG--ERDDTTELLTAGTFVGYSVILIALFAGYLLGNPL  63
      K +E+ L  C+  H +          +L  TF  Y+++          LL
Sbjct  5  WVFFKLLIEVFLGSIKMGFHVVEGSMYWPEPIPHIILYCATFGSYTLAALGAFRLLKSS  64
Query  64  NKKLDLFFSLIGCAMFIASGVLILK-----EWENAWSTDTKKIAITKSS  107
      +L  +      +  G+L+++          E+      K+  +I
Sbjct  65  ILSSELLLAASAMGLHYFCGLLVMRSAMQDKHLSAMNSTWQYLEHPHFARCKRQSIG---  121
Query  108  LAVTNGVLFFFDAIFTF  124
      A+  G  ++
Sbjct  122  -ALITGTMYLMHMFLLL  137

```

>  [ref|XP\\_002014263.1](#)  GL19107 [Drosophila persimilis]  
[gb|EDW28259.1](#)  GL19107 [Drosophila persimilis]  
Length=378

[GENE ID: 6588831 Dper\GL19107](#) | GL19107 gene product from transcript GL19107-RA [Drosophila persimilis] (10 or fewer PubMed links)

Score = 77.9 bits (191), Expect = 3e-13, Method: Composition-based stats.  
Identities = 19/137 (13%), Positives = 41/137 (29%), Gaps = 22/137 (16%)

```

Query  6  LSIVKFLELALAITCVLHYKSLG--ERDDTTELLTAGTFVGYSVILIALFAGYLLGNPL  63
      K +E+ L  C+  H +          +L  TF  Y+++          LL
Sbjct  5  WVFFKLLIEVFLGSIKMGFHVVEGSMYWPEPIPHIILYCATFGSYTLAALGAFRLLKSS  64
Query  64  NKKLDLFFSLIGCAMFIASGVLILK-----EWENAWSTDTKKIAITKSS  107
      +L  +      +  + G+L+++          E+      K+  +I
Sbjct  65  ILSSELLLAASAMGLHYSCGLLVMRSARQDKHLSAMNSTWQYLEHPHFARCKRQSIG---  121
Query  108  LAVTNGVLFFFDAIFTF  124
      A+  G  ++
Sbjct  122  -ALITGTMYLMHMFLLL  137

```

>  [ref|XP\\_002427111.1](#)  conserved hypothetical protein [Pediculus humanus corporis]  
[gb|EEB14373.1](#)  conserved hypothetical protein [Pediculus humanus corporis]  
Length=155

[GENE ID: 8229744 Phum\\_PHUM294820](#) | hypothetical protein [Pediculus humanus corporis]

Score = 72.9 bits (178), Expect = 1e-11, Method: Composition-based stats.  
Identities = 28/113 (24%), Positives = 49/113 (43%), Gaps = 10/113 (8%)

```

Query  21  VVLHYKSLGERDDTTELLTAGTFVGYSVILIALFAGYLL-GNPLNKKLDLFFSLIGCAMF  79
      V  +      E+      E++ +G FVG Y V  +++  YLL G  +      D  +++G  M+
Sbjct  38  VGGTFNLNEEKAVDVEIMASGIFVGYLVYNLSVLITYLLTGERII--NDCIMNVLGLFMW  95
Query  80  IASGVLILKEWENA-----WSTDTKKIAITKSSLAVTNGVLFFFDAIFTFR  125
      IA      L  W+N          +  +  +  +  SL V N  L  D+  F+  +

```

> [ref|XP\\_002427110.1|](#) **G** conserved hypothetical protein [Pediculus humanus corporis]  
[gb|EEB14372.1|](#) **G** conserved hypothetical protein [Pediculus humanus corporis]  
Length=139

[GENE ID: 8229743 Phum\\_PHUM294810](#) | hypothetical protein  
[Pediculus humanus corporis]

Score = 69.0 bits (168), Expect = 1e-10, Method: Composition-based stats.  
Identities = 23/103 (22%), Positives = 41/103 (39%), Gaps = 8/103 (7%)

Query 21 VVLHYKSLGERDDTTELLTAGTFVGYSVILIALFAGYLLGNPLNKKLDLFFSLIGCAMFI 80  
V + E++ E+L +G FVG Y + I+ Y + + + D +LIG ++  
Sbjct 38 VGAVWNFNEEKNV DVEILASGVFVGYLLYNISALITYCISSEKSAN-DCLMNLIGIFLWT 96  
Query 81 ASGVLILKEWE-----NAWSTDTKKIAITKSSLAVTNGVLF 116  
L W N + + K + + SL+V N  
Sbjct 97 GVAGTALHYWPGFQNEHGNEYKSTEKDVGMAVGSLSVLNAAAH 139

> [ref|XP\\_002038007.1|](#) **G** GM17988 [Drosophila sechellia]  
[gb|EDW54425.1|](#) **G** GM17988 [Drosophila sechellia]  
Length=376

[GENE ID: 6613539 Dsec\GM17988](#) | GM17988 gene product from transcript GM17988-RA  
[Drosophila sechellia] (10 or fewer PubMed links)

Score = 62.9 bits (152), Expect = 1e-08, Method: Composition-based stats.  
Identities = 21/137 (15%), Positives = 39/137 (28%), Gaps = 22/137 (16%)

Query 6 LSIVKFLELALAITCVLHYKSLG--ERDDTTELLTAGTFVGYSVILIALFAGYLLGNPL 63  
K +E+ L C+ H + +L TF ++ + +L  
Sbjct 5 WVFFKLIIEVLLGSLCMFFHIRGSSYPERTPHMILYCATFSSFTALAALGAFRLVLRST 64  
Query 64 NKKLDLFFSLIGCAMFIASGVLI-----LKEWENAWSTDTKKIAITKSS 107  
L +L + GVLI ++ E+ K+ +I  
Sbjct 65 VLSSQLLLTL SAVLSHYICGVLMRTAMLDPHLPFINSTIEYLEHHPFAHCKRQSIA--- 121  
Query 108 LAVTNGVLF FFFDAIFTF 124  
A+ G ++ F  
Sbjct 122 -ALVTGTM YLMHMFHVF 137

> [ref|XP\\_001968858.1|](#) **G** GG24274 [Drosophila erecta]  
[gb|EDV57917.1|](#) **G** GG24274 [Drosophila erecta]  
Length=397

[GENE ID: 6542937 Dere\GG24274](#) | GG24274 gene product from transcript GG24274-RA  
[Drosophila erecta] (10 or fewer PubMed links)

Score = 61.3 bits (148), Expect = 3e-08, Method: Composition-based stats.  
Identities = 21/137 (15%), Positives = 40/137 (29%), Gaps = 22/137 (16%)

Query 6 LSIVKFLELALAITCVLHYKSLG--ERDDTTELLTAGTFVGYSVILIALFAGYLLGNPL 63  
K +E+ L C+ H + +L TF ++ + +L  
Sbjct 5 WVFFKLIIEVLLGSLCMFFHIRGSSYPERTPHVILYCATFSSFTALAALGAFRLILARSS 64  
Query 64 NKKLDLFFSLIGCAMFIASGVLI-----LKEWENAWSTDTKKIAITKSS 107  
L +L + GVLI ++ E+ K+ +I  
Sbjct 65 VLSSQLLLTL SAVLAHYS CGVLMRTAMLDPHLASINSTIEYLEHHPFAHCKRQSIA--- 121  
Query 108 LAVTNGVLF FFFDAIFTF 124  
A+ G ++ F  
Sbjct 122 -ALITGTM YLMHMFHVF 137

> [ref|XP\\_002089166.1|](#) **G** GE18971 [Drosophila yakuba]



[gb|EDW88878.1](#) |  GE18971 [Drosophila yakuba]  
Length=397

[GENE ID: 6528099 Dyak\GE18971](#) | GE18971 gene product from transcript GE18971-RA [Drosophila yakuba] (10 or fewer PubMed links)

Score = 61.3 bits (148), Expect = 3e-08, Method: Composition-based stats.  
Identities = 21/137 (15%), Positives = 39/137 (28%), Gaps = 22/137 (16%)

```
Query 6 LSIVKFLELALAITCVVLHYKSLG--ERDDTTELLTAGTFVGYSVILIALFAGYLLGNPL 63
      K +E+ L C+ H + +L TF ++ + +L
Sbjct 5 WVFFKLEIEVVLGSACMFFHIRGSSYPERTPHVILYCATFSSFTALAALGAFRLMLARSS 64

Query 64 NKKLDLFFSLIGCAMFIASGVLI-----LKEWENAWSTDTKKIAITKSS 107
      L +L GVLI ++ E+ K+ +I
Sbjct 65 VLSSQLLLTL SAVLSHYFCGV LIMRTAMEDPHLASINSTIEYLEHPHFAYCKQKSIA--- 121

Query 108 LAVTNGVLEFFDAIFTF 124
      A+ G ++ F
Sbjct 122 -ALITGTMVLMHMFHVF 137
```

>  [ref|NP\\_608969.1](#) |  CG14000 [Drosophila melanogaster]

[gb|AAM11016.1](#) |  AT26438p [Drosophila melanogaster]

[gb|AAF52301.2](#) |  CG14000 [Drosophila melanogaster]

[gb|ACL87403.1](#) | CG14000-PA [synthetic construct]

[gb|ACL92014.1](#) | CG14000-PA [synthetic construct]

Length=398

[GENE ID: 33820 CG14000](#) | CG14000 gene product from transcript CG14000-RA [Drosophila melanogaster] (10 or fewer PubMed links)

Score = 61.3 bits (148), Expect = 3e-08, Method: Composition-based stats.  
Identities = 22/137 (16%), Positives = 39/137 (28%), Gaps = 22/137 (16%)

```
Query 6 LSIVKFLELALAITCVVLHYKSLG--ERDDTTELLTAGTFVGYSVILIALFAGYLLGNPL 63
      K +E+ L C+ H + +L TF ++ + LL
Sbjct 5 WVFFKLEIEVLLGSVCMFFHIRGSSYPERTPHVILYCATFSSFTALAALGAFRLLLARST 64

Query 64 NKKLDLFFSLIGCAMFIASGVLI-----LKEWENAWSTDTKKIAITKSS 107
      L +L GVLI ++ E+ K+ +I
Sbjct 65 VLSSQLLLTL SAVLSHYFCGV LIMRTAMLDPHLAFINSTIEYLEHPHFAHCKQQSIA--- 121

Query 108 LAVTNGVLEFFDAIFTF 124
      A+ G ++ F
Sbjct 122 -ALVTGTMVLMHMFHVF 137
```

>  [gb|EFA08059.1](#) | hypothetical protein TcasGA2\_TC005655 [Tribolium castaneum]  
Length=265

Score = 60.2 bits (145), Expect = 7e-08, Method: Composition-based stats.  
Identities = 24/93 (25%), Positives = 39/93 (41%), Gaps = 5/93 (5%)

```
Query 10 KFLELALAITCVVLHYKSL-----GERDDTTELLTAGTFVGYSVILIALFAGYLLGNPLN 64
      K LEL L I C+ + +L G D + + GY +I + L Y L +
Sbjct 32 KILELLLCIICIGTVFDALKTGMGIGNSDLHHIGIMYTAYTGYILITLTLTLLTSYYLEATIP 91

Query 65 KKLDLFFSLIGCAMFIASGV LILKEWENAWSTD 97
      K FS+ G +F+ +GVL++ +
Sbjct 92 YKTSALFSVCGAGLFLTTGVLLIVDRSAYMRRY 124
```

Score = 51.3 bits (122), Expect = 3e-05, Method: Composition-based stats.  
Identities = 26/122 (21%), Positives = 53/122 (43%), Gaps = 11/122 (9%)

```
Query 15 ALAITCVVLHYKSLGE-----RDDTTELLTAGTFVGYSVILIALFAGYLLGNPLNKKLDL 69
      + + C+ ++ E + + GY +I + L AG +G+ + +
Sbjct 139 LICVVCLGFIFEPANEIHLGGNYMHHTGVMYTAYTGYMLINVVLLAGRAIGDRIPYITII 198
```

Query 70 FFSLIGCAMFIASGVLLIKEWENAWSTDT--KKIAITKSSLAV----TNGVLFFFDAIFT 123  
 F +IG A+F+ +GVL+L + ++ +T +++V N +F +A FT  
 Sbjct 199 VFDVIGAALFLITGVLLLVDRIRLARDIFHPRQYLLTMMTVSVCFAFANCGVFLLEAFFT 258

Query 124 FR 125  
 R  
 Sbjct 259 RR 260

>  [ref|XP\\_001962403.1](#) |  GF15443 [Drosophila ananassae]  
[gb|EDV31624.1](#) |  GF15443 [Drosophila ananassae]  
 Length=417

[GENE ID: 6498251 Dana\GF15443](#) | GF15443 gene product from transcript GF15443-RA [Drosophila ananassae] (10 or fewer PubMed links)

Score = 56.7 bits (136), Expect = 9e-07, Method: Composition-based stats.  
 Identities = 15/137 (10%), Positives = 42/137 (30%), Gaps = 22/137 (16%)

Query 6 LSIVKFLLELALAITCVLHYKSLG--ERDDTTELLTAGTFVGYSVILIALFAGYLLGNPL 63  
 K +E+ L C+ +H + + + ++ TF+ ++ + L+  
 Sbjct 5 WVFFKLIIEVVLGALCMSIHMRGAILWPQYVSHVYIICATFISFTALAALGAFRLLITQKC 64

Query 64 NKKLDLFFSLIGCAMFIASGVLLIK-----EWENAWSTDTKKIAITKSS 107  
 L +L G+ +++ E+ + K+ +I  
 Sbjct 65 VLSSQLLLTLGAVIAHYFCGLFVMRDIANINLLSAANNSNEYLEHPAFSICKQQSIA--- 121

Query 108 LAVTNGVLFFFDAIFTF 124  
 ++ G ++  
 Sbjct 122 -SLITGTMYLMHMFHVL 137

>  [ref|NP\\_572519.1](#) |   CG15366 [Drosophila melanogaster]  
[gb|AAF46436.1](#) |  CG15366 [Drosophila melanogaster]  
 Length=117

[GENE ID: 31832 CG15366](#) | CG15366 gene product from transcript CG15366-RA [Drosophila melanogaster] (10 or fewer PubMed links)

Score = 54.0 bits (129), Expect = 5e-06, Method: Composition-based stats.  
 Identities = 25/103 (24%), Positives = 48/103 (46%), Gaps = 20/103 (19%)

Query 33 DTTELLTAGTFVGYSVILIAL-----FAGYLLGNPLNKKLDLFFSL 73  
 LL GT +GY + + F+G++ G ++K+LD+ FS+  
 Sbjct 4 IRHALLVHGTLLIGYLITCFVIATGKTLKASNLATVYEVDMFSGHVSQVVDKRLDILFSI 63

Query 74 IGCAMFIASGVLLIKEWENA-WSTDTKKIAITKSSLAVTNGVL 115  
 G +F A+G +IL +W S + +++ + L++ NG +  
 Sbjct 64 GGFFLFGAAGTIILAQWLGYCKSQEERQLLLASGILSLANGAI 106

>  [ref|XP\\_002429371.1](#) |  Cylicin-1, putative [Pediculus humanus corporis]  
[gb|EEB16633.1](#) |  Cylicin-1, putative [Pediculus humanus corporis]  
 Length=781

[GENE ID: 8230225 Phum\\_PHUM430470](#) | Cylicin-1, putative [Pediculus humanus corporis]

Score = 53.6 bits (128), Expect = 7e-06, Method: Composition-based stats.  
 Identities = 23/93 (24%), Positives = 38/93 (40%), Gaps = 2/93 (2%)

Query 34 TTELLTAGTFVGYSVILIALFAGYLLGNPLN-KKLDLFFSLIGCAMFIASGVLLIKEWEN 92  
 + T+ Y +I I L G G +K++ FF ++G +FIA+G L L E  
 Sbjct 36 NGAIFADVYGSYIIITIGLIIGQCSGELKRCRKMENFFLIVGAILFIATGSLELAAL- 94

Query 93 AWSTDTKKIAITKSSLAVTNGVLFFFDAIFTFR 125  
 + A ++ G LF D + +  
 Sbjct 95 SVEERLVDNAAILGVFSLVAGFLFIIDLLTASK 127

> [ref|NP\\_611858.1|](#) **UG** CG13566 [Drosophila melanogaster]

[gb|AAF47117.1|](#) **G** CG13566 [Drosophila melanogaster]

Length=207

**GENE ID: 37813 CG13566** | CG13566 gene product from transcript CG13566-RA [Drosophila melanogaster] (10 or fewer PubMed links)

Score = 42.1 bits (98), Expect = 0.017, Method: Composition-based stats.  
Identities = 19/81 (23%), Positives = 27/81 (33%), Gaps = 0/81 (0%)

```
Query 42 TFGVYSVILIALFAGYLLGNPLNKKLDLFFSLIGCAMFIASGVLILKEWENAWSTDTKKI 101
          TFGY+ I L ++ N L +F L++ S D
Sbjct 69 TFGYTFIAAVLLLTRIEGTSNYGTCEIILLTCGVLFFFTIEGLLIFFTVEQLSEDLIF 128

Query 102 AITKSSLAVTNGVLFFFDAIF 122
          A +L LF D +F
Sbjct 129 AYALGALCFICAALFALDLMF 149
```

> [ref|XP\\_002040187.1|](#) **G** GM15486 [Drosophila sechellia]

[gb|EDW57052.1|](#) **G** GM15486 [Drosophila sechellia]

Length=207

**GENE ID: 6615817 Dsec\GM15486** | GM15486 gene product from transcript GM15486-RA [Drosophila sechellia] (10 or fewer PubMed links)

Score = 41.7 bits (97), Expect = 0.024, Method: Composition-based stats.  
Identities = 19/81 (23%), Positives = 27/81 (33%), Gaps = 0/81 (0%)

```
Query 42 TFGVYSVILIALFAGYLLGNPLNKKLDLFFSLIGCAMFIASGVLILKEWENAWSTDTKKI 101
          TFGY+ I L ++ N L +F L++ S D
Sbjct 69 TFGYTFIAAVLLLTRIEGTSNYGTCEVILLTCGVLFFFTIEGLLIFFTVEQLSEDLVLF 128

Query 102 AITKSSLAVTNGVLFFFDAIF 122
          A +L LF D +F
Sbjct 129 AYALGALCFVCAALFALDLMF 149
```

> [ref|XP\\_001902958.1|](#) **G** hypothetical protein Bm1\_57500 [Brugia malayi]

[gb|EDP28194.1|](#) **G** hypothetical protein Bm1\_57500 [Brugia malayi]

Length=360

**GENE ID: 6106382 Bm1\_57500** | hypothetical protein [Brugia malayi] (10 or fewer PubMed links)

Score = 41.3 bits (96), Expect = 0.031, Method: Composition-based stats.  
Identities = 27/145 (18%), Positives = 50/145 (34%), Gaps = 26/145 (17%)

```
Query 6 LSIVKFLELA-----LAITCVVLHYKSLGE-----RDDTTELLTAGTFVGYSVILI 51
          +K +EL L V + E + L +S + +
Sbjct 211 RVAIKAIELVGAFLMLGAATVGFIIISPVELSLYAFVKMTHTEWQGLVLA VSGSFSALCL 270

Query 52 ALFAGYLLGNPLN--KKLDLFFSLIGCAMFIASGVLILKEWENAWSTDTKKIA----- 102
          + G GN ++ D SL+G ++ GV+ + D+KKI
Sbjct 271 FMLFGSFFGNRYMLWRRFDYLLISLVGSFGYLFVGVIE-AYYATCHPPDSKKIIGLVCHRL 329

Query 103 --ITKSSLAVTNGVLFFFDAIFTFR 125
          I ++L N +++ D + +FR
Sbjct 330 EWIIATALIFINVIVYIVDCVLSFR 354
```

> [ref|XP\\_001688606.1|](#) **G** AGAP004947-PA [Anopheles gambiae str. PEST]

[gb|EDO63986.1|](#) **G** AGAP004947-PA [Anopheles gambiae str. PEST]

Length=245

**GENE ID: 5667388 AgaP\_AGAP004947** | AGAP004947-PA [Anopheles gambiae str. PEST] (10 or fewer PubMed links)

Score = 40.9 bits (95), Expect = 0.043, Method: Composition-based stats.  
Identities = 19/118 (16%), Positives = 33/118 (27%), Gaps = 14/118 (11%)

```
Query 17 AITCVVLHYKSLGE--RDDTTELLTAGTFVGYSVILIALFAGYLLG-NPLNKKLDLFFSL 73
      + C LH +           E+L G + Y +I   F      G LN ++ S
Sbjct 62 CLICAGLHIQGFLLHYPEFPFPHEMLFCGLYASYFLISFYSLFLYKGCCELNYTVEAIVSG 121

Query 74 IGCAMFIASG-VLILKEWENAWSTDTKK-----IAITKSSLAVTNGVLFFFDA 120
      +F+ S V +      ++           +S A      +F
Sbjct 122 AAFLLFVVSAFVSMYHAEKDIHLQYLTDDEEWYHPFFVYCRQLQSLGATITAQMFLVHC 179
```

>  [ref|XP\\_001976508.1|](#)  GG19973 [Drosophila erecta]  
[gb|EDV56908.1|](#)  GG19973 [Drosophila erecta]  
Length=207

[GENE ID: 6548131 Dere\GG19973](#) | GG19973 gene product from transcript GG19973-RA  
[Drosophila erecta] (10 or fewer PubMed links)

Score = 40.5 bits (94), Expect = 0.051, Method: Composition-based stats.  
Identities = 17/81 (20%), Positives = 27/81 (33%), Gaps = 0/81 (0%)

```
Query 42 TFGYSVILIALFAGYLLGNPLNKKLDLFFSLIGCAMFIASGVLILKEWENAWSTDTKKI 101
      TFGV++ + L ++ N L +F L++ S D
Sbjct 69 TFGVFTFVAALLLRIEGTSNYGTCEIILLTCGVLFFFTIEGLLIFFTVEQLSEDLLVY 128

Query 102 AITKSSLAVTNGVLFFFDAIF 122
      A +L LF D +F
Sbjct 129 AYALGALCFICAALFALDLMF 149
```
