# Supplementary material
Source: PubMed Central journal article supplement (PMC2950210)
Supplement: NIHMS231853-supplement-06.pdf [file NIHMS231853-supplement-06.pdf]

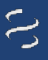

PSI blast Iteration 6

ANODAR\_208657821 gi|208657821|gb|ACI30201.1|...

Skip to the first new sequence

**Query ID** lcl|67793  
**Description** ANODAR\_208657821  
 gi|208657821|gb|ACI30201.1| 41 kDa family  
 salivary secreted protein [Anopheles darlingi]  
**Molecule type** amino acid  
**Query Length** 406

**Database Name** nr  
**Description** All non-redundant GenBank CDS  
 translations+PDB+SwissProt+PIR+PRF excluding  
 environmental samples from WGS projects  
**Program** BLASTP 2.2.23+ [Citation](#)

Other reports: [Search Summary](#) [\[Taxonomy reports\]](#) [\[Distance tree of results\]](#) [\[Multiple alignment\]](#)

Graphic Summary

Distribution of 107 Blast Hits on the Query Sequence

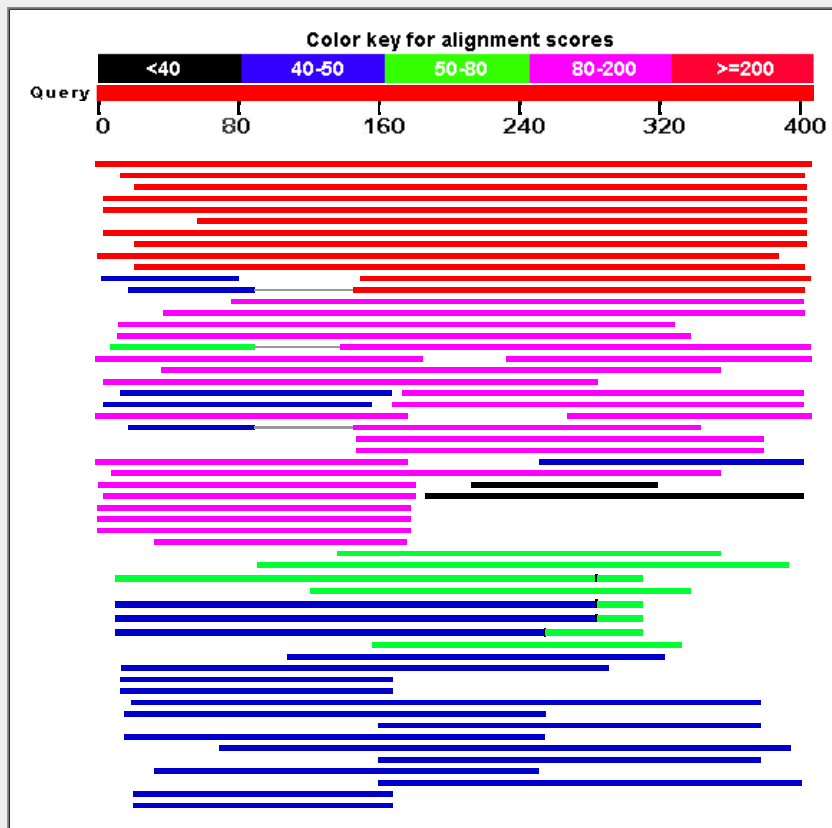

Descriptions

Legend for links to other resources: [U](#) UniGene [E](#) GEO [G](#) Gene [S](#) Structure [M](#) Map Viewer

- NEW** - alignment score below the threshold on the previous iteration
- - alignment was checked on the previous iteration

Run PSI-Blast iteration 7 with max

Sequences producing significant alignments with E-value BETTER than threshold

| Accession                      | Description                                                       | Max score | Total score | Query coverage | E value | Links              |
|--------------------------------|-------------------------------------------------------------------|-----------|-------------|----------------|---------|--------------------|
| <a href="#">ACI30201.1</a>     | 41 kDa family salivary secreted protein [Anopheles darlingi]      | 352       | 352         | 100%           | 4e-95   |                    |
| <a href="#">AAR18425.1</a>     | putative 41.9 kDa basic salivary protein [Culex quinquefasciatus] | 298       | 298         | 95%            | 7e-79   |                    |
| <a href="#">ACJ64440.1</a>     | putative 41.9 kDa basic salivary protein [Culex tarsalis]         | 286       | 286         | 93%            | 4e-75   |                    |
| <a href="#">ABE18273.1</a>     | putative 41 kDa salivary secreted protein [Aedes aegypti]         | 281       | 281         | 98%            | 1e-73   |                    |
| <a href="#">XP_001648978.1</a> | hypothetical protein AaeL_AAEL004382 [Aedes aegypti] >gb EAT4     | 278       | 278         | 98%            | 9e-73   | <a href="#">UG</a> |
| <a href="#">XP_001850512.1</a> | 41.9 kDa basic salivary protein [Culex quinquefasciatus] >gb EDS  | 277       | 277         | 84%            | 2e-72   | <a href="#">UG</a> |

|  |                                |                                                                      |                      |      |     |       |  |
|--|--------------------------------|----------------------------------------------------------------------|----------------------|------|-----|-------|--|
|  | <a href="#">ABF18024.1</a>     | putative 41 kDa salivary secreted protein [Aedes aegypti]            | <a href="#">273</a>  | 273  | 98% | 3e-71 |  |
|  | <a href="#">AAX55661.1</a>     | 39 kDa salivary protein [Phlebotomus ariasi]                         | <a href="#">234</a>  | 234  | 93% | 1e-59 |  |
|  | <a href="#">AAS16908.1</a>     | 37.2 kDa salivary protein [Lutzomyia longipalpis]                    | <a href="#">228</a>  | 228  | 95% | 1e-57 |  |
|  | <a href="#">ABA43063.1</a>     | 46 kDa salivary protein SP19 [Phlebotomus perniciosus]               | <a href="#">211</a>  | 211  | 93% | 2e-52 |  |
|  | <a href="#">ACU30954.1</a>     | putative 41 kDa salivary secreted protein [Ochlerotatus triseriatus] | <a href="#">211</a>  | 211  | 62% | 2e-52 |  |
|  | <a href="#">XP_001648977.1</a> | hypothetical protein AaeL_AAEL004353 [Aedes aegypti] >gb EAT4        | <a href="#">206</a>  | 206  | 63% | 5e-51 |  |
|  | <a href="#">ACM40881.1</a>     | laminin-like secreted salivary protein [Culicoides nubeculosus]      | <a href="#">196</a>  | 196  | 79% | 4e-48 |  |
|  | <a href="#">ACS93519.1</a>     | 46 kDa salivary protein [Phlebotomus arabisus]                       | <a href="#">196</a>  | 196  | 89% | 4e-48 |  |
|  | <a href="#">AAV90688.1</a>     | putative 41 kDa salivary secreted basic protein [Aedes albopictus]   | <a href="#">190</a>  | 190  | 77% | 3e-46 |  |
|  | <a href="#">YP_078665.1</a>    | phage related protein [Bacillus licheniformis ATCC 14580] >ref YP.   | <a href="#">186</a>  | 186  | 80% | 6e-45 |  |
|  | <a href="#">XP_001850511.1</a> | salivary mucin [Culex quinquefasciatus] >gb EDS32122.1  salivary     | <a href="#">176</a>  | 176  | 65% | 6e-42 |  |
|  | <a href="#">ACI30188.1</a>     | putative 41.9 kDa basic salivary protein [Anopheles darlingi]        | <a href="#">173</a>  | 173  | 42% | 4e-41 |  |
|  | <a href="#">XP_002388385.1</a> | hypothetical protein MPER_12601 [Monilophthora pernicioso FA55       | <a href="#">167</a>  | 167  | 78% | 2e-39 |  |
|  | <a href="#">AAX54873.1</a>     | putative 30.3 kDa secreted protein [Aedes aegypti]                   | <a href="#">162</a>  | 162  | 68% | 6e-38 |  |
|  | <a href="#">AAU06485.1</a>     | unknown salivary protein [Culicoides sonorensis]                     | <a href="#">161</a>  | 161  | 55% | 2e-37 |  |
|  | <a href="#">ACH56926.1</a>     | hypothetical protein [Simulium vittatum]                             | <a href="#">156</a>  | 156  | 57% | 4e-36 |  |
|  | <a href="#">ACI30197.1</a>     | putative 41.9 kDa basic salivary protein [Anopheles darlingi]        | <a href="#">149</a>  | 149  | 34% | 6e-34 |  |
|  | <a href="#">ABF18165.1</a>     | putative salivary mucin [Aedes aegypti]                              | <a href="#">149</a>  | 149  | 48% | 6e-34 |  |
|  | <a href="#">XP_771922.1</a>    | hypothetical protein CNBN1020 [Cryptococcus neoformans var. ne       | <a href="#">136</a>  | 136  | 56% | 4e-30 |  |
|  | <a href="#">XP_568542.1</a>    | vacuolar membrane protein [Cryptococcus neoformans var. neofor       | <a href="#">136</a>  | 136  | 56% | 5e-30 |  |
|  | <a href="#">XP_310399.1</a>    | AGAP003841-PA [Anopheles gambiae str. PEST] >emb CAC35525.           | <a href="#">125</a>  | 125  | 45% | 9e-27 |  |
|  | <a href="#">AAR18443.1</a>     | putative threonine/serine-rich mucin [Culex quinquefasciatus]        | <a href="#">125</a>  | 125  | 43% | 1e-26 |  |
|  | <a href="#">XP_001864883.1</a> | threonine/serine-rich mucin [Culex quinquefasciatus] >gb EDS408      | <a href="#">122</a>  | 122  | 43% | 7e-26 |  |
|  | <a href="#">XP_001841204.1</a> | hypothetical protein CC1G_10201 [Coprinopsis cinerea okayama7#       | <a href="#">121</a>  | 121  | 84% | 2e-25 |  |
|  | <a href="#">ABI83794.1</a>     | gSG10 salivary mucin [Anopheles funestus]                            | <a href="#">114</a>  | 114  | 44% | 3e-23 |  |
|  | <a href="#">XP_001661479.1</a> | hypothetical protein AaeL_AAEL011183 [Aedes aegypti] >gb ABF1        | <a href="#">106</a>  | 106  | 43% | 6e-21 |  |
|  | <a href="#">ACI30119.1</a>     | gSG10 salivary mucin [Anopheles darlingi]                            | <a href="#">102</a>  | 102  | 43% | 8e-20 |  |
|  | <a href="#">ACI30120.1</a>     | gSG10 salivary mucin [Anopheles darlingi]                            | <a href="#">99.0</a> | 99.0 | 43% | 8e-19 |  |
|  | <a href="#">ACI30122.1</a>     | gSG10 salivary mucin [Anopheles darlingi]                            | <a href="#">97.1</a> | 97.1 | 43% | 3e-18 |  |
|  | <a href="#">ABJ97695.1</a>     | putative threonine/serine-rich mucin [Toxorhynchites amboinensis     | <a href="#">80.9</a> | 80.9 | 35% | 2e-13 |  |
|  | <a href="#">XP_001882977.1</a> | predicted protein [Laccaria bicolor S238N-H82] >gb EDR06605.1        | <a href="#">55.1</a> | 55.1 | 53% | 2e-05 |  |
|  | <a href="#">XP_759967.1</a>    | hypothetical protein UM03820.1 [Ustilago maydis 521] >gb EAK84       | <a href="#">55.1</a> | 55.1 | 74% | 2e-05 |  |
|  | <a href="#">ZP_06695858.1</a>  | phage tail protein [Enterococcus faecium E1636] >gb EFF22799.1       | <a href="#">54.3</a> | 54.3 | 51% | 3e-05 |  |
|  | <a href="#">NP_690686.2</a>    | structural protein [Bacillus phage SPP1] >emb CAL18687.1  unnar      | <a href="#">53.2</a> | 53.2 | 52% | 5e-05 |  |
|  | <a href="#">ZP_00602924.1</a>  | Phage tail tape measure protein TP901, core region [Enterococcus     | <a href="#">52.0</a> | 52.0 | 51% | 1e-04 |  |
|  | <a href="#">ZP_05713621.1</a>  | tail protein [Enterococcus faecium DO]                               | <a href="#">51.6</a> | 51.6 | 51% | 2e-04 |  |
|  | <a href="#">ZP_05661457.1</a>  | phage tail tape measure protein TP901 [Enterococcus faecium 1,2      | <a href="#">51.2</a> | 51.2 | 51% | 2e-04 |  |
|  | <a href="#">YP_176319.1</a>    | tail length tape measure protein [Bacillus clausii KSM-K16] >dbj E   | <a href="#">50.5</a> | 50.5 | 43% | 4e-04 |  |
|  | <a href="#">ZP_05924009.1</a>  | phage tail tape measure protein TP901 [Enterococcus faecium TC       | <a href="#">48.6</a> | 48.6 | 52% | 0.001 |  |

Run PSI-Blast iteration 7 with max

#### Sequences with E-value WORSE than threshold

| Accession | Description                    | Max score                                                           | Total score          | Query coverage | E value | Links |  |
|-----------|--------------------------------|---------------------------------------------------------------------|----------------------|----------------|---------|-------|--|
|           | <a href="#">CAC35527.1</a>     | gSG9 protein [Anopheles gambiae]                                    | <a href="#">46.2</a> | 46.2           | 19%     | 0.008 |  |
|           | <a href="#">ZP_04674169.1</a>  | conserved hypothetical protein [Lactobacillus paracasei subsp. par  | <a href="#">44.3</a> | 44.3           | 67%     | 0.031 |  |
|           | <a href="#">FDL20001.1</a>     | Unc-51 like kinase 1 (C. elegans), isoform CRA_a [Mus musculus]     | <a href="#">43.9</a> | 43.9           | 37%     | 0.031 |  |
|           | <a href="#">AAH59835.1</a>     | ULK1 protein [Mus musculus]                                         | <a href="#">43.9</a> | 43.9           | 37%     | 0.034 |  |
|           | <a href="#">BAE28476.1</a>     | unnamed protein product [Mus musculus]                              | <a href="#">43.9</a> | 43.9           | 37%     | 0.036 |  |
|           | <a href="#">ZP_04248588.1</a>  | Prophage LambdaBa01, membrane protein [Bacillus cereus Rock1-       | <a href="#">43.9</a> | 43.9           | 87%     | 0.037 |  |
|           | <a href="#">EFB27064.1</a>     | hypothetical protein PANDA_003089 [Ailuropoda melanoleuca]          | <a href="#">43.5</a> | 43.5           | 58%     | 0.043 |  |
|           | <a href="#">ZP_04223830.1</a>  | Prophage LambdaBa01, membrane protein [Bacillus cereus Rock3-       | <a href="#">43.5</a> | 43.5           | 53%     | 0.051 |  |
|           | <a href="#">AAA64834.1</a>     | ankyrin G [Homo sapiens]                                            | <a href="#">43.5</a> | 43.5           | 58%     | 0.051 |  |
|           | <a href="#">ZP_05354696.1</a>  | TP901 family phage tail tape measure protein [Clostridium difficile | <a href="#">43.2</a> | 43.2           | 79%     | 0.059 |  |
|           | <a href="#">YP_002749202.1</a> | TMP repeat-containing protein [Bacillus cereus 03BB102] >gb ACC     | <a href="#">43.2</a> | 43.2           | 53%     | 0.062 |  |
|           | <a href="#">ZP_04106162.1</a>  | Uncharacterized phage protein [Bacillus thuringiensis serovar berli | <a href="#">41.6</a> | 41.6           | 53%     | 0.20  |  |
|           | <a href="#">ZP_04251409.1</a>  | Prophage LambdaBa01, membrane protein [Bacillus cereus 95/82C       | <a href="#">41.2</a> | 41.2           | 59%     | 0.21  |  |
|           | <a href="#">BAE32939.1</a>     | unnamed protein product [Mus musculus]                              | <a href="#">41.2</a> | 41.2           | 36%     | 0.23  |  |
|           | <a href="#">Q70405.1</a>       | RecName: Full=Serine/threonine-protein kinase ULK1; AltName: F      | <a href="#">41.2</a> | 41.2           | 36%     | 0.23  |  |
|           | <a href="#">NP_033495.2</a>    | serine/threonine-protein kinase ULK1 [Mus musculus] >gb AAH57       | <a href="#">41.2</a> | 41.2           | 36%     | 0.24  |  |
|           | <a href="#">AAC78143.1</a>     | 270 kDa ankyrin G isoform [Rattus norvegicus]                       | <a href="#">40.8</a> | 40.8           | 59%     | 0.27  |  |
|           | <a href="#">NP_001029156.1</a> | ankyrin 3, epithelial isoform 2 [Rattus norvegicus]                 | <a href="#">40.8</a> | 40.8           | 59%     | 0.27  |  |
|           | <a href="#">XP_002619294.1</a> | hypothetical protein CLUG_00453 [Clavospora lusitanae ATCC 427      | <a href="#">40.8</a> | 40.8           | 51%     | 0.28  |  |
|           | <a href="#">XP_002807495.1</a> | PREDICTED: LOW QUALITY PROTEIN: ankyrin-3-like [Callithrix jac      | <a href="#">40.8</a> | 40.8           | 58%     | 0.30  |  |

|                                |                                                                      |                      |      |     |      |    |
|--------------------------------|----------------------------------------------------------------------|----------------------|------|-----|------|----|
| <a href="#">NP_001101811.1</a> | serine/threonine-protein kinase ULK1 [Rattus norvegicus] >gb EDL9    | <a href="#">40.8</a> | 40.8 | 46% | 0.31 | UG |
| <a href="#">ZP_05332071.1</a>  | phage protein [Clostridium difficile QCD-63q42] >ref ZP_05399216     | <a href="#">40.8</a> | 40.8 | 63% | 0.34 |    |
| <a href="#">ZP_04146935.1</a>  | Prophage LambdaBa01, membrane protein [Bacillus thuringiensis s      | <a href="#">40.5</a> | 40.5 | 88% | 0.35 |    |
| <a href="#">EDL97288.1</a>     | ankyrin 3, epithelial, isoform CRA_i [Rattus norvegicus] >gb EDL9    | <a href="#">40.5</a> | 40.5 | 59% | 0.36 | G  |
| <a href="#">BAC65639.1</a>     | mKIAA0722 protein [Mus musculus]                                     | <a href="#">40.5</a> | 40.5 | 36% | 0.39 | G  |
| <a href="#">CAH73232.1</a>     | ankyrin 3, node of Ranvier (ankyrin G) [Homo sapiens] >emb CAI       | <a href="#">40.5</a> | 40.5 | 58% | 0.44 | G  |
| <a href="#">EAW54200.1</a>     | ankyrin 3, node of Ranvier (ankyrin G), isoform CRA_b [Homo sap      | <a href="#">40.5</a> | 40.5 | 58% | 0.44 | G  |
| <a href="#">NP_066267.2</a>    | ankyrin-3 isoform 1 [Homo sapiens] >sp Q12955.3 ANK3_HUMAN           | <a href="#">40.1</a> | 40.1 | 58% | 0.46 | UG |
| <a href="#">BAE33746.1</a>     | unnamed protein product [Mus musculus]                               | <a href="#">40.1</a> | 40.1 | 36% | 0.46 | G  |
| <a href="#">XP_002612001.1</a> | hypothetical protein BRAFLDRAFT_124780 [Branchiostoma floridae       | <a href="#">40.1</a> | 40.1 | 37% | 0.46 | G  |
| <a href="#">XP_001929357.1</a> | PREDICTED: ankyrin 3, node of Ranvier (ankyrin G) [Sus scrofa]       | <a href="#">40.1</a> | 40.1 | 58% | 0.50 | UG |
| <a href="#">YP_001987063.1</a> | Tail tape measure protein [Lactobacillus casei BL23] >emb CAQ66      | <a href="#">40.1</a> | 40.1 | 67% | 0.50 | G  |
| <a href="#">ZP_04019473.1</a>  | conserved hypothetical protein [Finegoldia magna ATCC 53516] >c      | <a href="#">40.1</a> | 40.1 | 84% | 0.51 |    |
| <a href="#">EFA12920.1</a>     | hypothetical protein TcasGA2_TC006990 [Tribolium castaneum]          | <a href="#">40.1</a> | 40.1 | 36% | 0.53 |    |
| <a href="#">NP_203744.1</a>    | MICAL-like protein 1 [Homo sapiens] >sp Q8N3F8.2 MILK1_HUMA          | <a href="#">40.1</a> | 40.1 | 37% | 0.55 | UG |
| <a href="#">XP_515124.2</a>    | PREDICTED: molecule interacting with Rab13 [Pan troglodytes]         | <a href="#">39.7</a> | 39.7 | 37% | 0.66 | UG |
| <a href="#">XP_001843226.1</a> | conserved hypothetical protein [Culex quinquefasciatus] >gb EDS3     | <a href="#">39.3</a> | 39.3 | 73% | 0.77 | G  |
| <a href="#">XP_002462548.1</a> | hypothetical protein SORBIDRAFT_02g027920 [Sorghum bicolor] >        | <a href="#">39.3</a> | 39.3 | 75% | 0.78 | UG |
| <a href="#">XP_001644303.1</a> | hypothetical protein Kpol_1066p9 [Vanderwaltozyma polyspora DS       | <a href="#">39.3</a> | 39.3 | 50% | 0.81 | G  |
| <a href="#">ZP_05690681.1</a>  | phage tape measure protein [Staphylococcus aureus A8115] >ref        | <a href="#">39.3</a> | 39.3 | 45% | 0.96 |    |
| <a href="#">XP_002257750.1</a> | SICA antigen (fragment) [Plasmodium knowlesi strain H] >emb Ca       | <a href="#">39.3</a> | 39.3 | 50% | 0.99 |    |
| <a href="#">CAQ07542.1</a>     | MICAL-like 1 [Homo sapiens]                                          | <a href="#">38.9</a> | 38.9 | 37% | 1.0  | G  |
| <a href="#">BAB33338.1</a>     | KIAA1668 protein [Homo sapiens]                                      | <a href="#">38.9</a> | 38.9 | 37% | 1.0  | G  |
| <a href="#">ZP_04105490.1</a>  | TMP repeat-containing protein [Bacillus thuringiensis serovar berlin | <a href="#">38.9</a> | 38.9 | 43% | 1.3  |    |
| <a href="#">CAD38718.1</a>     | hypothetical protein [Homo sapiens]                                  | <a href="#">38.5</a> | 38.5 | 37% | 1.4  | G  |
| <a href="#">ZP_03158061.1</a>  | Hemolysin-type calcium-binding region [Cyanothecae sp. PCC 7822      | <a href="#">38.5</a> | 38.5 | 72% | 1.5  |    |
| <a href="#">XP_001122565.1</a> | PREDICTED: hypothetical protein [Apis mellifera]                     | <a href="#">38.5</a> | 38.5 | 25% | 1.5  | UG |
| <a href="#">XP_001580855.1</a> | hypothetical protein [Trichomonas vaginalis G3] >gb EAY19869.1       | <a href="#">38.5</a> | 38.5 | 36% | 1.6  | UG |
| <a href="#">XP_001648260.1</a> | hypothetical protein AaeL_AAEL014240 [Aedes aegypti] >gb EAT3        | <a href="#">38.5</a> | 38.5 | 66% | 1.6  |    |
| <a href="#">EEZ97902.1</a>     | hypothetical protein TcasGA2_TC000287 [Tribolium castaneum]          | <a href="#">38.5</a> | 38.5 | 52% | 1.7  |    |
| <a href="#">ZP_05688243.1</a>  | phage tape measure protein [Staphylococcus aureus A9299] >gb         | <a href="#">38.2</a> | 38.2 | 45% | 1.8  |    |
| <a href="#">XP_002767144.1</a> | centromere protein a, putative [Perkinsus marinus ATCC 50983] >      | <a href="#">38.2</a> | 38.2 | 48% | 2.1  | G  |
| <a href="#">YP_239580.1</a>    | ORF001 [Staphylococcus phage 69] >gb AAX90756.1  ORF001 [St          | <a href="#">38.2</a> | 38.2 | 45% | 2.1  | G  |
| <a href="#">ZP_01630797.1</a>  | hypothetical protein N9414_06069 [Nodularia spumigena CCY9414        | <a href="#">38.2</a> | 38.2 | 49% | 2.1  |    |
| <a href="#">XP_002420533.1</a> | RNA-binding protein, putative [Candida dubliniensis CD36] >emb       | <a href="#">37.8</a> | 37.8 | 36% | 2.3  | G  |
| <a href="#">XP_001032003.1</a> | hypothetical protein THERM_00703320 [Tetrahymena thermophila]        | <a href="#">37.8</a> | 37.8 | 46% | 2.6  | G  |
| <a href="#">ZP_06324921.1</a>  | tape measure protein [Staphylococcus aureus subsp. aureus D139       | <a href="#">37.8</a> | 37.8 | 45% | 2.6  |    |
| <a href="#">BAE38328.1</a>     | unnamed protein product [Mus musculus] >gb EDL31272.1  RIKEI         | <a href="#">37.8</a> | 37.8 | 48% | 2.8  | G  |
| <a href="#">NP_766596.1</a>    | group B scavenger receptor cysteine-rich domain-containing precu     | <a href="#">37.8</a> | 37.8 | 48% | 2.8  | UG |
| <a href="#">NP_803295.1</a>    | tape measure protein [Staphylococcus phage 11] >gb AAL82270.1        | <a href="#">37.8</a> | 37.8 | 44% | 2.8  | G  |
| <a href="#">YP_500528.1</a>    | phage tape measure protein [Staphylococcus aureus subsp. aureu       | <a href="#">37.8</a> | 37.8 | 44% | 2.9  | G  |
| <a href="#">YP_627836.1</a>    | outer membrane protein HopI [Helicobacter pylori HPAG1] >gb AE       | <a href="#">37.4</a> | 37.4 | 39% | 3.0  | G  |
| <a href="#">EEU07699.1</a>     | Sef1p [Saccharomyces cerevisiae JAY291]                              | <a href="#">37.4</a> | 37.4 | 49% | 3.1  |    |
| <a href="#">EDN64553.1</a>     | suppressor of essential function [Saccharomyces cerevisiae YJM78     | <a href="#">37.4</a> | 37.4 | 49% | 3.1  |    |
| <a href="#">NP_009487.2</a>    | Putative transcription factor, has homolog in Kluyveromyces lactis   | <a href="#">37.4</a> | 37.4 | 49% | 3.2  | G  |
| <a href="#">ZP_06327389.1</a>  | tape measure protein [Staphylococcus aureus subsp. aureus C427       | <a href="#">37.4</a> | 37.4 | 45% | 3.3  |    |
| <a href="#">NP_846030.1</a>    | prophage LambdaBa01, membrane protein, putative [Bacillus anth       | <a href="#">37.4</a> | 37.4 | 53% | 3.3  | G  |
| <a href="#">YP_001004316.1</a> | tail protein [Staphylococcus phage phiETA2] >dbj BAF43871.1  ta      | <a href="#">37.4</a> | 37.4 | 45% | 3.7  | G  |
| <a href="#">YP_874001.1</a>    | phage tape measure protein [Staphylococcus phage phiNM] >ref Y       | <a href="#">37.4</a> | 37.4 | 45% | 3.8  | G  |
| <a href="#">ZP_00393935.1</a>  | COG5280: Phage-related minor tail protein [Bacillus anthracis str.   | <a href="#">37.0</a> | 37.0 | 53% | 3.8  |    |
| <a href="#">NP_371425.1</a>    | hypothetical protein SAV0901 [Staphylococcus aureus subsp. aure      | <a href="#">37.0</a> | 37.0 | 45% | 4.1  | G  |
| <a href="#">YP_001246278.1</a> | Phage-related protein-like protein [Staphylococcus aureus subsp.     | <a href="#">37.0</a> | 37.0 | 45% | 4.2  | G  |
| <a href="#">XP_001818890.1</a> | hypothetical protein [Aspergillus oryzae RIB40] >dbj BAE56888.1      | <a href="#">37.0</a> | 37.0 | 39% | 4.2  | G  |
| <a href="#">ZP_06327622.1</a>  | tape measure protein [Staphylococcus aureus A9765] >gb EFB995        | <a href="#">37.0</a> | 37.0 | 45% | 4.3  |    |
| <a href="#">YP_001332062.1</a> | phage tape measure protein [Staphylococcus aureus subsp. aureu       | <a href="#">37.0</a> | 37.0 | 45% | 4.4  | G  |
| <a href="#">YP_001949854.1</a> | putative tape measure protein [Staphylococcus phage phiMR25] >       | <a href="#">37.0</a> | 37.0 | 45% | 4.4  | G  |
| <a href="#">YP_239735.1</a>    | ORF001 [Staphylococcus phage 85] >gb AAX90911.1  ORF001 [St          | <a href="#">37.0</a> | 37.0 | 45% | 4.7  | G  |
| <a href="#">XP_001870945.1</a> | conserved hypothetical protein [Culex quinquefasciatus] >gb EDS3     | <a href="#">37.0</a> | 37.0 | 53% | 4.7  | UG |
| <a href="#">YP_239657.1</a>    | ORF001 [Staphylococcus phage 53] >ref YP_001285370.1  tape m         | <a href="#">36.6</a> | 36.6 | 45% | 5.0  | G  |
| <a href="#">XP_002009072.1</a> | GI13843 [Drosophila mojavensis] >gb EDW19548.1  GI13843 [Dr          | <a href="#">36.6</a> | 36.6 | 41% | 5.7  | G  |
| <a href="#">YP_002332525.1</a> | putative tape measure protein [Staphylococcus phage phiSauS-IP1      | <a href="#">36.6</a> | 36.6 | 45% | 6.3  | G  |
| <a href="#">YP_084997.1</a>    | prophage membrane protein [Bacillus cereus E33L] >gb AAU1685         | <a href="#">36.6</a> | 36.6 | 53% | 6.4  | G  |
| <a href="#">XP_002380327.1</a> | mucin, putative [Aspergillus flavus NRRL3357] >gb EED49946.1  u      | <a href="#">36.2</a> | 36.2 | 39% | 6.6  | G  |
| <a href="#">XP_001026080.1</a> | SAM domain containing protein [Tetrahymena thermophila] >gb E        | <a href="#">36.2</a> | 36.2 | 61% | 8.0  | G  |

|                                |                                                                      |                      |      |     |     |  |
|--------------------------------|----------------------------------------------------------------------|----------------------|------|-----|-----|--|
| <a href="#">YP_417175.1</a>    | phage-like protein [Staphylococcus aureus RF122] >emb CAI8140        | <a href="#">36.2</a> | 36.2 | 44% | 8.1 |  |
| <a href="#">XP_002720066.1</a> | PREDICTED: inter-alpha (globulin) inhibitor H5-like [Oryctolagus c   | <a href="#">36.2</a> | 36.2 | 64% | 8.4 |  |
| <a href="#">ZP_04675278.1</a>  | conserved hypothetical protein [Lactobacillus jensenii 1153] >gb E   | <a href="#">35.8</a> | 35.8 | 36% | 8.7 |  |
| <a href="#">ZP_05414794.1</a>  | putative fibronectin type III domain protein [Bacteroides finegoldii | <a href="#">35.8</a> | 35.8 | 63% | 9.7 |  |
| <a href="#">ACA52029.1</a>     | surface anchor protein [Lactobacillus jensenii]                      | <a href="#">35.8</a> | 35.8 | 36% | 9.7 |  |

Run PSI-Blast iteration 7 with max

## Alignments

Select All [Get selected sequences](#) [Distance tree of results](#) [Multiple alignment](#)

> [gb|ACI30201.1|](#) 41 kDa family salivary secreted protein [Anopheles darlingi]  
Length=406

Score = 352 bits (903), Expect = 4e-95, Method: Composition-based stats.  
Identities = 406/406 (100%), Positives = 406/406 (100%), Gaps = 0/406 (0%)

```

Query 1  MNRSMVVLALLIAAIGIIPWYVDAFLFTTPWNPQPRTINQLPVTSAATPTTQQSNV 60
Sbjct 1  MNRSMVVLALLIAAIGIIPWYVDAFLFTTPWNPQPRTINQLPVTSAATPTTQQSNV 60

Query 61  TLALGNRINTDTALTDYGTNVNGLGINVNRNRNRDIWNIESNPVLAGLAANNPVNGSY 120
Sbjct 61  TLALGNRINTDTALTDYGTNVNGLGINVNRNRNRDIWNIESNPVLAGLAANNPVNGSY 120

Query 121  IAIGNQVPHLPNNLSNVSLNIASGSSGGAGQTVPSNFSFPLMIPDNYTQAFQKLVTFQ 180
Sbjct 121  IAIGNQVPHLPNNLSNVSLNIASGSSGGAGQTVPSNFSFPLMIPDNYTQAFQKLVTFQ 180

Query 181  TLPLDAMDSIVQTLSDAYSNTFKGLFTAAGLNGLNETLEHGRSVIEDGIQSIQVQGAQGF 240
Sbjct 181  TLPLDAMDSIVQTLSDAYSNTFKGLFTAAGLNGLNETLEHGRSVIEDGIQSIQVQGAQGF 240

Query 241  EQVIASFNDSARVQCVGPDLSPTSIGRRVVGKGTDCVNRKWRQLSDIGGRIAGDILAA 300
Sbjct 241  EQVIASFNDSARVQCVGPDLSPTSIGRRVVGKGTDCVNRKWRQLSDIGGRIAGDILAA 300

Query 301  DRGASDFLGNLTTTCNGANFNAADASSGGTGRNALRRQCYVRAIGNFPQSLFLPVSILT 360
Sbjct 301  DRGASDFLGNLTTTCNGANFNAADASSGGTGRNALRRQCYVRAIGNFPQSLFLPVSILT 360

Query 361  EGGKLYAALSSSLQTDVALCASEMGLEIGLVTAQVSSKIAFCQLAQL 406
Sbjct 361  EGGKLYAALSSSLQTDVALCASEMGLEIGLVTAQVSSKIAFCQLAQL 406

```

> [gb|AAR18425.1|](#) putative 41.9 kDa basic salivary protein [Culex quinquefasciatus]  
Length=412

Score = 298 bits (762), Expect = 7e-79, Method: Composition-based stats.  
Identities = 85/399 (21%), Positives = 164/399 (41%), Gaps = 33/399 (8%)

```

Query 15  AIGIIPWYVDAFLFTTPWNPQPRTINQLPVTSAATPTTQQSNVTLALGN---RINTD 71
Sbjct 36  QVGATDTGNTITGLTIILSRWSGKVSLSGSGNQIEVSSFGNDSTMIRVGYQHLLTKLNEP 95

Query 72  TALTDYGTNVNGLGINVNRNRNRDIWNIESNPVLAGLAA-----NPNVNGSYIAI 123
Sbjct 96  SSSVELPAPIEPTNNTIPSRKRRTGFLPILPVTIVTFFVPSVPAAPAIPIPTMNSNYISI 155

Query 124  GNQVPHLPNNLSNVSLNIASGSSGGAGQTVPSNFSFPLMIPDNYTQAFQKLVTFQVTL 183
Sbjct 156  GGLKLVGLPESITKLTANT-----SIGTGSVQSN-----TMQQWQFLKTLMERRP 201

Query 184  LDAMDSIVQTLSDAYSNTFKGLFTAAGLNGLNETLEHGRSVIEDGIQSIQVQGAQGFQV 243
Sbjct 202  SKILDVVDVDFLATSYLSTGKVMVDGA-LTALNKTEAFFYNIIGNSSLLNYATDQVSLGLQGV 260

Query 244  IASFNDSARVQCVGPDLSPTSIGRRVVGKGTDCVNRKWRQLSDIGGRIAGDILAADRG 303
Sbjct 261  TRSFNDLTQMKRKTGCV--GAPENAGRRVMEKATGCVRELRDEVIQVDFRTNVEATEGV 318

Query 304  ASDFLGNLTTTCNGANFNAADASSGGTGRNALRRQCYVRAIGNFPQSLFLPVSILTIEGG 363
Sbjct 319  FSGWLTQLKCNKFNPTLADAEL-----DAAQRKCYAEALVSPGKVVDIPLRWTTLAS 373

Query 364  KLYAALSSSLQTDVALCASEMGLEIGLVTAQVSSKIAFCQ 402
Sbjct 374  RISTAVTTFKAQLGLCAGKIVLEVAIAIANELGSKITSCA 412

```

> [gb|ACI64440.1|](#) putative 41.9 kDa basic salivary protein [Culex tarsalis]  
Length=414

Score = 286 bits (730), Expect = 4e-75, Method: Composition-based stats.  
Identities = 91/392 (23%), Positives = 160/392 (40%), Gaps = 33/392 (8%)

```

Query 23  VDAFLFTTPWNPQPRTINQLPVTSAATPTTQQSNVTLALGN---RINTDTALTDYGT 79
Sbjct 42  TRINGLTIIVLRWFQKVTIVSGNGNQIDVLGTGNDSTTIRIGLKQNPAKLKAASYLLEPA 101

Query 80  NVNGLGINVNRNRNRDIWNIESNPVLAGLAA-----NPNVNGSYIAIGNQVPHLP 131
Sbjct 102  SREILNNTIPSRKRRTGFLPILPVPPTFFVPSVPAAPAIPIPTMNGNYISIDGKLVRLP 161

Query 132  NNLNSVSLNIASGSSGGAGQTVPSNFSFPLMIPDNYTQAFQKLVTFQVTLPLDAMDSIV 191
Sbjct 162  DSISNSTINAATGSSPLA-----TAGSMQQWQFLQTLIERRPSKILDPLV 207

```

Query 192 QTLSDAYSNTFKGLFTAAGLNGLNLEHGRSVIEDGIQSIQVDDQGAQGFQVIAFNDSS 251  
+L++Y+TK+GLLT++DQ+G+VSNF+  
Sbjct 208 EFLANNYLSTGKMMVD-KGLAALGATEAYFYNIANTSLSNYATDQVSLGLQGVTRSFNGLT 266

Query 252 ARVQCVGPDLSPTSGRRVVGKGTDCVNRKWRQLSDIGGRIAGDILAADRASDFLGNL 311  
+CVGP GRRV++T CV++I++A+S+L+  
Sbjct 267 LMKRTCVG--GVPEDAGRRVMERSTGCVRERLDEVIGIVDQFRSNVEATEGVFSGWLIEM 324

Query 312 TTCNGANFNAAADASSGGTGRNALRRQCYVRAIGNFQSLFLPVSLTIEGGKLYAALSS 371  
CN NF S +RQCY+A+L+P T +Y A++  
Sbjct 325 QKCNANFNLADEL-----DVAQRQCYSQASVSPTGKLIDIPQRWTLALRTYAVNT 379

Query 372 LQTDVALCASEMGLIEGLVTAQVSSKIAFCQL 403  
Q V LC++GLEI++A SKI C L  
Sbjct 380 FQAQVGLCVAVGLEIAAISAEFGSKITSCAL 411

> [gb|ABF18273.1](#) putative 41 kDa salivary secreted protein [Aedes aegypti]  
Length=396

Score = 281 bits (717), Expect = 1e-73, Method: Composition-based stats.  
Identities = 102/420 (24%), Positives = 173/420 (41%), Gaps = 57/420 (13%)

Query 5 MSVVLALLIAAIGIIPWYVDALFLLTPWNPQPPRTINQLPVTSATSATPTQSSNVTLAL 64  
+SV+ LI++PW+ PW+S VT+++  
Sbjct 11 L SVMGLFLIPSLLEASPWF-----WPWQSRA-----SPSIVTISI 44

Query 65 GNRINTDTALTDYGTNVNGLGINVNR-----RRRDIWNIESNPVLAG 109  
GNR N+++TD GT++ L N++R+ R +NI+  
Sbjct 45 GNRFNNS-VTDEGTSIRDLTFLNLSRWKGNLTFEKNGTIELITRGNLGVNIIHIDFGSNS 103

Query 110 LAANN---PVNGSYIAIGNQVFLPNNLSNVSLNIASGSSGGAG-QTVPSNFSTFLP-MI 164  
+NPN++F LP+L++G+G P  
Sbjct 104 KSQQNETVPSNATQSRKKREIFGLPS-LPAIPIPTINGTQAAIGENFFQLPNEIANPASN 162

Query 165 PDNYTQAFQKLVTFQ-QTLPLDAMDSIVQTLSDAYSNTFKGLFTAAGLNGLNLEHGRS 223  
N+Q+QLT+LP+D+VLSYS+TK+G+NLET++S  
Sbjct 163 ASNFLQPWQFLQTLITRRLPMQFLDTAVSYLSQLYSSTAKNMLDT-GVNTLAETMDTLSS 221

Query 224 VIEDGIQSIQVDDQGAQGFQVIAFNDSSARVQCVGPDLSPTSGRRVVGKGTDCVNRKW 283  
++ I DQAGV SF+ QCVG P +VVK T CV+W  
Sbjct 222 IVNSTLDYIEDQTAAGIRGVAISFRELPAQRQSCVQ--VPDDAAQPVVTKATGCVDRDR 279

Query 284 RQLSDIGGRIAGDILAADRASDFLGNLTTTCNGANFNAAADASSGGTGRNALRRQCYVRA 343  
+L I + + + +L L CN NF D + +A+R CYV+  
Sbjct 280 NELDGVNQLVAVSDEEAYGGWLRALDGCNARNFAGVDEAEL-----DAAQRSCYVQN 334

Query 344 IGNFQSLFLPVSLTIEGGKLYAALSSLQTDVALCASEMGLIEGLVTAQVSSKIAFCQL 403  
I + ++P+ + + + Q V LC +G++V+A + I CQ  
Sbjct 335 ISKSVEKMDIPIQWANLAARASSIVMQFPQVGLCVAGVAKVAASANIGVQIMLCQA 394

> [ref|XP\\_001648978.1](#) **UG** hypothetical protein AaeL\_AEL004382 [Aedes aegypti]

[gb|EAT44234.1](#) **G** conserved hypothetical protein [Aedes aegypti]  
Length=396

[GENE ID: 5564658 AaeL\\_AEL004382](#) | hypothetical protein [Aedes aegypti]  
(10 or fewer PubMed links)

Score = 278 bits (710), Expect = 9e-73, Method: Composition-based stats.  
Identities = 104/420 (24%), Positives = 175/420 (41%), Gaps = 57/420 (13%)

Query 5 MSVVLALLIAAIGIIPWYVDALFLLTPWNPQPPRTINQLPVTSATSATPTQSSNVTLAL 64  
+SV+ LI++PW+ PW+S VT+++  
Sbjct 11 L SVMGLFLIPSLLEASPWF-----WPWQSRA-----SPSIVTISI 44

Query 65 GNRINTDTALTDYGTNVNGLGINVNR-----RRRDIWNIESNPVLAG 109  
GNR N++T+TD GT++ L N++R+ R +NI+  
Sbjct 45 GNRVNSNT-VTDEGTSIRDLTFLNLSRWKGNLTFEKNGTIELITRGNLGVNIIHIDFGSNS 103

Query 110 LAANN---PVNGSYIAIGNQVFLPNNLSNVSLNIASGSSGGAG-QTVPSNFSTFLP-MI 164  
+NPN++F LP+L++G+G P  
Sbjct 104 KSQQNETVPSNVTQSRKKREIFGLPS-LPAIPIPTLNGTQAAIGENFFPLPNEIANPASN 162

Query 165 PDNYTQAFQKLVTFQ-QTLPLDAMDSIVQTLSDAYSNTFKGLFTAAGLNGLNLEHGRS 223  
N+Q+QLT+LP+D+VLSYS+TK+G+NLET++S  
Sbjct 163 ASNFLQPWQFLQTLITRRLPMQFLDTAVSYLSQLYSSTAKSMLDT-GVNTLAETMDTLSS 221

Query 224 VIEDGIQSIQVDDQGAQGFQVIAFNDSSARVQCVGPDLSPTSGRRVVGKGTDCVNRKW 283  
++ I DQAGV SF+ QCVG P +VVK T CV+W  
Sbjct 222 IVNSTLDYIEDQTAAGIRGVAISFRELPAQRQSCVQ--VPDDAAQPVVTKATGCVDRDR 279

Query 284 RQLSDIGGRIAGDILAADRASDFLGNLTTTCNGANFNAAADASSGGTGRNALRRQCYVRA 343  
+L I + + + +L L CN NF D + +A+R CYV+  
Sbjct 280 NELDGVNQLVAVSDEEAYGGWLRALDGCNARNFAGVDEAEL-----DAAQRSCYVQN 334

Query 344 IGNFQSLFLPVSLTIEGGKLYAALSSLQTDVALCASEMGLIEGLVTAQVSSKIAFCQL 403  
I + ++P+ + + + Q V LC +G++V+A + I CQ  
Sbjct 335 ISKSVEKMDIPIQWANLAARASSIVMQFPQVGLCVAGVAKVAASANIGVQIMLCQA 394

> [ref|XP\\_001850512.1](#) **UG** 41.9 kDa basic salivary protein [Culex quinquefasciatus]

[gb|EDS32123.1](#) **G** 41.9 kDa basic salivary protein [Culex quinquefasciatus]  
Length=338

[GENE ID: 6041220 CpipJ\\_CPIJ008900](#) | 41.9 kDa basic salivary protein  
[Culex quinquefasciatus]

Score = 277 bits (707), Expect = 2e-72, Method: Composition-based stats.  
Identities = 82/356 (23%), Positives = 155/356 (43%), Gaps = 33/356 (9%)

Query 59 NVTLALGN---RINTDTALTDYGTNVNGLGINVNR-----RRRDIWNIESNPVLAGLAA--- 112  
+ + G Q ++N ++ + + RR+R I + +  
Sbjct 1 MIRVYGGHLLTKLNEPSSSVELPAPIEPTNNTIPSRKRKRETFGLPILPVATPFPVPSVPA 60

Query 113 -----NPNVNGSYIAIGNQVFLPNNLSNVSLNIASGSSGGAGQTVPSNFSTFLPMIPDN 167  
+N+YI+IG++LP+++N SGGVSN  
Sbjct 61 APAIPIPTMNSNYISIGGKLVGLPESITKLTANT----SIGTGSVQSN-----T 106

Query 168 YTOAFQKLVTFQFQTLPLDAMDSDIVQTLSDAYSNTFKGLFTAAGLNGLNLEHGRSVIED 227  
 Q + Q L T + P +D +V L+ +Y +T K + A L LN+T ++  
 Sbjct 107 MQQPWFQFLKTLMEERRPSKILDPVVDPLATSYLSTGKVMVDGA-LTALNKTEAFFYFNIGNS 165

Query 228 GIQSIQVQGAQGFQEQVIASFNDSARVQCVGPDLSPTSIGRRVVGKGTDCVNRKWRQLS 287  
 +DQ +G +V SFND + + CVG +P + GRRV+ K T CV + ++  
 Sbjct 166 SLNYATDQVSLGLQGVTRSFNDLTMKRTCVG--GAPENAGRVRMEKATGCVRERLDEVI 223

Query 288 DIGGRIAGDILAADRASDFLGNLTTTCNGANFNAADASSGGTGRNALRRQCYVRAIGNF 347  
 I + ++ A + S +L + CN NF + +A +R+CY A+ +  
 Sbjct 224 GIVDQRTNVEATEGVFSGWLIEMQCKNAKNFPTLADTEL----DAAQRKCYAEALVSP 278

Query 348 PQSLLFLPVSLLTIEGGKLYAALSSLQTDVALCASEMGLEIGLVTAQVSSKIAFCQL 403  
 ++ +P+ T ++ A+++ + + LCA ++ LE+ + ++ SKI C L  
 Sbjct 279 TGKVVDIPLRWTTLASRISTAVITFKAQGLCAGKIVLEVAIAIANELGSKITSCAL 334

> [gb|ABF18024.1](#) putative 41 kDa salivary secreted protein [Aedes aegypti]  
 Length=395

Score = 273 bits (697), Expect = 3e-71, Method: Composition-based stats.  
 Identities = 103/420 (24%), Positives = 173/420 (41%), Gaps = 58/420 (13%)

Query 5 MSVVLALLIAAIGIIPWYVDAFLFTTPWNPQPPRTINQLPVTSAATPTQSSNVTLAL 64  
 +SV+ LI ++ PW+ PW + S VT+++  
 Sbjct 11 LSVMGFLFLIPSLEASPWF-----WPWQSR-----SPSIVTISI 44

Query 65 GNRINTDTALTDYGTNVNGLGINVNR-----RRRDIWNIESNPVLG 109  
 GNR+N++T +TD GT++ L N++R + R + NI +  
 Sbjct 45 GNRVNSNT-VTDEGTSIRDLTFLNLSRWKGNLTFEKNGTIELITRGNQDVTNIHIDFGSNS 103

Query 110 LAANN---PVNGSYIAIGNQVFLPNNLSNVSLNIASGSSGGAG-QTVPSNFTFLP-MI 164  
 + N P N + ++F LP+ L + + +G+ G P P  
 Sbjct 104 KSQNETVPSNVTSRKKREIFGLPS-LPAIPIPTLNGTAAIGENFFLPNEIANPASN 162

Query 165 PDNYTQAFQKLVTF-QTLPLDAMDSDIVQTLSDAYSNTFKGLFTAAGLNGLNLEHGRS 223  
 N+ Q +Q L T + LP+ +D+ V LS YS+T K + G+N L ET++ S  
 Sbjct 163 ASNFLQFQWFLQTLITRRLPMQFLDTAVSYLSQLYSSTAKSMLDT-GVNTLAETMDTLSS 221

Query 224 VIEDGSIQVQGAQGFQEQVIASFNDSARVQCVGPDLSPTSIGRRVVGKGTDCVNRKW 283  
 ++ + I DQ A G V SF + Q CVG P + VV K T CV +W  
 Sbjct 222 IVNSTLDYIEDQTAAGIRGVAISFRELPAQARQSCVQ--VPDDAAQPVVTKATGCVDRWR 279

Query 284 RQLSDIGGRIAGDILAADRASDFLGNLTTTCNGANFNAADASSGGTGRNALRRQCYVRA 343  
 +L I + + ++ +L L CN NF D + +A +R CYV  
 Sbjct 280 NELDGVNQLVAVSDSEEAYGWLRLDGCNARNFAGVDEAEL-----DAAQRSCYVNI 334

Query 344 IGNFPQSLFLPVSLLTIEGGKLYAALSSLQTDVALCASEMGLEIGLVTAQVSSKIAFCQL 403  
 + ++ +P+ + + + Q V LC + +G ++ V+A + +I CQ  
 Sbjct 335 SKSVE-KMVDIPIQWANLAARASSIVMQFQPQVGLCVAGVGAKVAASANIGVQIMLCQA 393

> [gb|AA55661.1](#) 39 kDa salivary protein [Phlebotomus ariasi]  
 Length=375

Score = 234 bits (596), Expect = 1e-59, Method: Composition-based stats.  
 Identities = 43/388 (11%), Positives = 106/388 (27%), Gaps = 43/388 (11%)

Query 23 VDAFLFTTPWNPQPPRTINQLPVTSAATPTQSSNVTLALGNRINTDTALTDYGTNVN 82  
 L P + + + + S P N ++ + + +  
 Sbjct 12 ALLTLPLNPNEDVRSADVLESFTDDLKSFYPPDDVNEEVSETESRTRKRSLEQLKESQP 71

Query 83 GLGINVNR-----RRRDIWNIESNPVLAGLAANNPVNGSYIAIGN-----QVFLPNNLS 135  
 I + + + + P + + + + +N + + + + V L + +S  
 Sbjct 72 LKQIRETVAETTKYKGLFKTKPSGNQTESSNSTSTKTSRKRRLTDFIPVNSLKDIAIS 131

Query 136 NVSLNIASGSSGGAGQTVPSNFTFLPMPIDNYTQAFQKLVTFQFQTLPLDAMDSDIVQTL 195  
 + SN FL + D + + + + + + S+  
 Sbjct 132 QATSGAMKAFKPSSENKTSNPLDFLASLSD---ISRDLVQNSIKEVSGNLVSSVALYQV 188

Query 196 DAYSNTFKGLFTAAGLNGLNLEHGRSVIEDGSIQVQGAQGFQEQVIASFNDSARVQ 255  
 ++ + K ++ T + + V+ Q+ + S +  
 Sbjct 189 NSKLDIAIKSIGI-INQIBDRTKKVQYVMNALQQASN-----ITNSIGEQLSK-N 237

Query 256 CQVGPDLSPPTSIGRRVVGKGTDCVNRKWRQLSDIGGRIAGDILAADRASDFLGNLPTCN 315  
 C ++P + V+ CV K I ++ A SD + ++ C+  
 Sbjct 238 NCFQAFINPFKLFEEVIT---CVKNKIENGLKIAEETFKNLNQLSVPSPDIVSEVSKCS 293

Query 316 GANFNAADASSGGTGRNALRRQCYVRAIGNFPQSLFLPVSLLTIEGGKLYAALSSLQTD 375  
 CY+R + L LP+ ++ + + + D  
 Sbjct 294 QNQLNPLTKLL-----CYLRVPLQDDEEKLLLP IEFARRIREITNYFATMRMD 342

Query 376 VALCASEMGLEIGLVTAQVSSKIAFCQL 403  
 + C + + K+ C +  
 Sbjct 343 LIQCGIATIQ-----SIGDKVENCAI 363

> [gb|AAS16908.1](#) 37.2 kDa salivary protein [Lutzomyia longipalpis]  
 Length=350

Score = 228 bits (579), Expect = 1e-57, Method: Composition-based stats.  
 Identities = 57/390 (14%), Positives = 111/390 (28%), Gaps = 45/390 (11%)

Query 2 NRMSVVLALLIAAIGIIPWYVDAFLFTTPWNPQPPRTINQLPVTSAATPTQSSNV 61  
 + ++ A L L I F + T  
 Sbjct 1 MTFLLIILGAFLLVQIITASALGLPEQFKGLELDLPPKPLAETTYHEGLNDGKTDDEMVDIFK 60

Query 62 LALGNRINTDTALTDYGTNVNGLGINVNR-----RRRDIWNIESNPVLAGLAANNPVNGSYI 121  
 +L + D G N ++ + R + N++ P + L + +  
 Sbjct 61 -SLSDEFKFSDENLDVGEKKNYKRDITQNSVARNFLSNVKGIPSPSLPSPSPSPSIPS 119

Query 122 AIGNQVFLPNNLSNVSLNIASGSSGGAGQTVPSNF--STFLPMPIDNYTQAFQKLVTFQ 179  
 +Q P N A + FL D Y L  
 Sbjct 120 LWSSQTQAAP-----NTALALPESDYSLDMPNIVKNFLKETRDLYNDVGAFLKAIT 171

Query 180 QTLPLDAMDSDIVQTLSDAYSNTFKGLFTAAGLNGLNLEHGRSVIEDGSIQVQGA 237  
 + L + S + + +N K NE + R+ ++ +Q I D A  
 Sbjct 172 EALNTRSSSSQLLSPMVSTNKTKEFIR-----NEIQKVRKVRNFVQETLQKIRDISA 224

Query 238 QGFQEQVIASFNDSARVQCVGPDLSPTSIGRRVVGKGTDCVNRKWRQLSDIGGRIAGDI 297  
 ++V +S +C+ + +V G +C+ K+ I ++ ++  
 Sbjct 225 AIAKKVKSS-----ECLSNLTD---IKGLVSDGINCLKEKFPNDGKRIILQLYNNL 271



Query 298 LAADRASDFLGNLTTCCNGANFNAAADASSGGTGRNALRRQCYVRAIGNFPQSLFLFVPS 357  
 L + +D+ L C+ N R CY + + LPV  
 Sbjct 272 LKGLKIPNDLMVELKCKDNTQNNTL-----GRTICYFLTPLQLEKEQILLPVE 319  
 Query 358 LTIEGGKLYAALSSLQTDVALCASEMGLEI 387  
 +L S+++ D+ C I  
 Sbjct 320 FIKRILELTHYFSTMKEDLINCGITTIASI 349

> [gb|ABA43063.1|](#) 46 kDa salivary protein SP19 [Phlebotomus perniciosus]  
 Length=431

Score = 211 bits (535), Expect = 2e-52, Method: Composition-based stats.  
 Identities = 43/393 (10%), Positives = 108/393 (27%), Gaps = 58/393 (14%)

Query 23 VDAFLFTTPWNPQPRTINQLPVTSATSATTPTQ-----QSNVTLALGNRINTDTA 73  
 P + + I + S TP +S + + +  
 Sbjct 71 ALLTRVNPDDIKSAADILESFSGSLKYFQTPPDVVDQEESKTRSRKSRFTDIFQKSSP 130  
 Query 74 LTDYGTNVNGLGINVRRRRRRRDIWNIENPVLGAAANNPVNGSYIAIGNQVFLHPLNN 133  
 L + G + + + + + P ++N + + +  
 Sbjct 131 LKEIGERIEEIKKLGMLPK-----PQTPSGNQTDSSNTTSETQSRKKRALTDTF--- 181  
 Query 134 LSNVSLNIAGSSGGAGQVPSNFSTFLPMPIDNYT---QAFQKLVTFQTLPLDAMDS 189  
 + + + + G + + + + + D + A + + + S  
 Sbjct 182 ---IPMSLKDAISKTEVLIPSSASANSPLDFMSKLSDIANDLIQNSMKEISENLASS 238  
 Query 190 IVQTLSDAYSNTFKGLFTAAGLNLNETLEHGRSVIEDGIQSIQVQGAQGFQVIAFND 249  
 + + + + K + + + + + + V + + + Q + + +  
 Sbjct 239 VAMYQVNSQLDAIKQSMDI-IKQEIDKTQKIQKVV----KEALNQAKNATKSLGKELKS 292  
 Query 250 SSARVQCVGPDLSPTSIGRRVVGKGTDCVNRKWRQLSDIGGRIAGDILAADRASDFLG 309  
 S ---NCFAQFINPKLFE---KGITCVKNKIDNGLKIAKDTFKNLQQAMSVPDIIQS 343  
 Sbjct 293 S-----  
 Query 310 NLTTCCNGANFNAAADASSGGTGRNALRRQCYVRAIGNFPQSLFLFVSLTIEGGKLYAAL 369  
 + + C + + + + + + CY+R L LP T + + +  
 Sbjct 344 EVSKCSQNNQNLN-----IAKLLCYLRTPLQLDDEKLLLPFEFTRRIRREITNYF 392  
 Query 370 SSLQTDVALCASEMGLEIGLVTAQVSSKIAFCQ 402  
 + + + + D+ C E + K+ C  
 Sbjct 393 ATMRMDLIRCGIETIQ-----SIGDKVEDCA 418

> [gb|ACU30954.1|](#) putative 41 kDa salivary secreted protein [Ochlerotatus triseriatus]  
 Length=253

Score = 211 bits (535), Expect = 2e-52, Method: Composition-based stats.  
 Identities = 70/259 (27%), Positives = 114/259 (44%), Gaps = 12/259 (4%)

Query 151 QTVPNSFSTFLPMPIDNYT---QAFQKLVTFQTF-LPLDAMDSIVQTLSDAYSNTFKGLF 206  
 + S P DN Q+Q L T LP+ +D+V LS YS T K L  
 Sbjct 3 PLPSAIISSLASPTAADNIRSLQPWQFLQTILNRRRLPMLVLDTVVSFLSQLYSATGKRLV 62  
 Query 207 TAAGLNLNETLEHGRSVIEDGIQSIQVQGAQGFQVIAFNDSSARVQCVGPDLSPTS 266  
 G+N + E + + + + + + + Q + G + V + + F D + Q CVG P  
 Sbjct 63 DT-GVNAVGEIITDFVSGIVNSALDLATEQASSGMQSVVGAFLDLTQTRQTCVGG--VPDD 119  
 Query 267 IGRRVVVGKGTDCVNRKWRQLSDIGGRIAGDILAADRASDFLGNLTTCCNGANFNAAAD 326  
 R+V+ K T C +W ++ I + + + + +L L CN NF S  
 Sbjct 120 AARQVISKATGRCARERWNEVEGIANQFLDVVDTTEAYGGWLRALDGCNARNFAGTSESR 179  
 Query 327 GGTGRNALRRQCYVRAIGNFPQSLFLFVSLTIEGGKLYAALSSLQTDVALCASEMGLE 386  
 T +R+CYV+AIGN + + +P+ + + + + A + + + Q V LC + +G E  
 Sbjct 180 KDT-----AQRCEYQAIGNSVGKIIDIIPMCWANLTLRTSNANANFPQVGLCVAGVGE 234  
 Query 387 IGLVTAQVSSKIAFCQLAQ 405  
 I V+A + +I CQ+ Q  
 Sbjct 235 IASVSANIGLRIVLCQVFQ 253

> [ref|XP\\_001648977.1|](#) **UG** hypothetical protein AaeL\_AEEL004353 [Aedes aegypti]  
[gb|EAT44233.1|](#) **G** hypothetical protein AaeL\_AEEL004353 [Aedes aegypti]  
 Length=308

GENE ID: 5564644 AaeL\_AEEL004353 | hypothetical protein [Aedes aegypti]  
 (10 or fewer PubMed links)

Sort alignments for this subject sequence by:  
 E value Score Percent identity  
[Query start position](#) [Subject start position](#)

Score = 206 bits (522), Expect = 5e-51, Method: Composition-based stats.  
 Identities = 35/259 (13%), Positives = 82/259 (31%), Gaps = 11/259 (4%)

Query 147 GGAGQTVPSNFSTFLPMPIDNYTQAFQKL--VTQFQTLPLDAMDSIVQTLSDAYSNTFKG 204  
 G + N S + N + + + + + + T + Y N + A  
 Sbjct 55 ISIGNRENTASIDYGTMITNLQINLARFNGLGDATEENRLEVIYTVLEGYRNRSEA 114  
 Query 205 LFTAAGLNLNETLEHGRSVIEDGIQSIQVQGAQGFQVIAFNDSSARVQCVGPDLS 264  
 + + L + + + Q E V S + V + C + + +  
 Sbjct 115 MVDSRLAWIDEVLLDIVQYARLQDENNRWLKQFPEHVRTSVAQLNETVRSCLEREVVV 174  
 Query 265 TSIIGRRVVVGKGTDCVNRKWRQLSDIGGRIAGDILAADRASDFLGNLTTCCNGANFNAAAD 323  
 + V + + C + + +L ++ ++ A D L TC +F + A  
 Sbjct 175 BELIHAVENRSRSGCLEGRQLKLFELREVAKNLLEFLASAGDLEDRLETCVNPFDL 234  
 Query 324 ASSGGTGRNALRRQCYVRAIGNFPQSLFLFVSLTIEGGKLYAALSSLQTDVALCASEM 383  
 N + C + + L L + + + G + AL + + CA+++  
 Sbjct 235 D-----NVYQEACISSILLEVEMESLKLGYTVSNLTGAMEPALGLAKAVLLECAADL 286  
 Query 384 GLEIGLVTAQVSSKIAFCQ 402  
 + + I C  
 Sbjct 287 AWYAFDASMSLRQWINS 305

Score = 48.2 bits (112), Expect = 0.002, Method: Composition-based stats.  
 Identities = 19/71 (26%), Positives = 35/71 (49%), Gaps = 3/71 (4%)

Query 20 PWYVDAFLFTTPWNPQPRTINQLPVTSATSATTPTQQSNVTLALGNRINTDTALTDYGT 79

```

P      +AF ++ W      T      + ++ ++ S      +++GNR NT+ ++ DYGT
Sbjct 15 PGTGNAFGWS--WFPPRQTTTTTASSGGTTSATSSNAVPSMYNISIGNRENTNASI-DYGT 71
Query  80 NVNGLGINVNR 90
      + L IN+ R
Sbjct 72 MITNLQINLAR 82

```

```

> gb|ACM40881.1 laminin-like secreted salivary protein [Culicoides nubeculosus]
Length=521

```

```

Score = 196 bits (497), Expect = 4e-48, Method: Composition-based stats.
Identities = 67/367 (18%), Positives = 106/367 (28%), Gaps = 52/367 (14%)

Query 78  GTNVNGLGINVNRRRRRRRDIWNIESNPVLAGLAANNPVNGSYIAI-----GNQVFHLP- 131
      G + L + + + + S P L L + N + + + + LP
Sbjct 157 GLPQSNLNPSSLFNSLPKMSLPGLPGLPGLPGLPQLQSNPSSLFSSLPKMSLPGLPK 216

Query 132 -----NNLSNVSNLNIASGSSGGAGQTVPNSFSTFLPMIPDNYTQAFQKLVTFQTLPLDA 186
      +NL + L G + S + +P+ L L
Sbjct 217 TSNPFDNLPKMGLPSLPGIP-----QPNLDLSSMFKNLPNLPQIPNLFDFNTLSKLALPG 271

Query 187 MDSIVQTLSDAYSNTFKGLFTAAG-----LNGLN 215
      + + +S SN FK L + N
Sbjct 272 LPDLNSLMSVLNKNFKQLLGIIPDVSSLSNLSNGTVQSALDNLQSKTTEAAKRANDSAN 331

Query 216 ETLEHGRSVIEDGIQSIVDQGAQGFQVIASFNDSSARVQCVGPDLSPTSIG-RRVVGK 274
      L +SV I QV + + +Q CV + +P S G +
Sbjct 332 SALSGLQSVGNTISNEIDKVKSAQTVNNTMKGLTSDIQDCVNRNGNPGSAGVKAQTS 391

Query 275 GTDCVNRKWRQSLDIGRIAGDILAADRGASDFLGNLTTCNGANFNAAADASSGGTGRNA 334
      CV K + I DI A G GNL+ C S T +A
Sbjct 392 AKKCVQDKVDEAKSIIDGTRNDIKQAQLGVEYLRGNLNSNCQLN---VMSLAEFLTISA 447

Query 335 LRRQCYVRAIGNFPQSLFLPVSILTIEGKLYAALSSLQTDVALCASEMGLEIGLVTAQV 394
      + C A+ + L +P+SL G + + LQ C + + EI T
Sbjct 448 SKPACLASALLSVQSETLLIPLSLASHGAQAVGLIQGLQGYAIKCMANLMEIEIAKSTLST 507

Query 395 SSKIAFC 401
      S A C
Sbjct 508 SLAAARC 514

```

```

> gb|ACS93519.1 46 kDa salivary protein [Phlebotomus arabis]
Length=442

```

```

Score = 196 bits (497), Expect = 4e-48, Method: Composition-based stats.
Identities = 39/373 (10%), Positives = 95/373 (25%), Gaps = 48/373 (12%)

Query 39  TINQLPVTSATSATPTQQSNVTLALGNRINTDTALTDYGTNVNGLGINVNRRRRRRRDI 98
      N + + +S + + + L V+ + + + +
Sbjct 96 LTNSYVTFDDANEASVTKSRSKRSPFLDQLKESQPLKAIREVDEVKQQLQAYLKPK--- 152

Query 99  WNIESNPVLAGLAANNPVNGSYIAIGN-----QVFHLPNNLSNVSNLNII--ASGSSGGAG 150
      P N + + V + LS S +
Sbjct 153 ---PQTPSGNQDNTTTTETQSRRRKRLSDYIPVNSFKDALSQASAAAAGKMMKPPNASL 209

Query 151 QTVPNSFSTFLPMIPDNYT-QAFQKLVTFQTLPLDAMDMSIVQTLSDAYSNTFKGLFTA 209
      S + + + + + S + + + K
Sbjct 210 SANASASGSNPLDFLTKISDIGRDLVQNSIKEIASNMASSAALYQVNSKLDAIKQSVNI- 268

Query 210 GLNGLNETLEHGRSVIEDGIQSIVDQGAQGFQVIASFNDSSARVQCVGPDLSPTSIGR 269
      + +T + + +I +Q + +V +S C + +P +
Sbjct 269 IQQEIEKTKK-VQEIINQALQQAGAATSSFGDKVTSS-----NCFQAFINPFKLF 318

Query 270 RVVGKGTDCVNRKWRQSLDIGRIAGDILAADRGASDFLGNLTTCNGANFNAAADASSGGT 329
      G CV K+ + I +I A SD ++ C+
Sbjct 319 G----GITCVKNKFDKGIKIATDTLNNISQALSVPSDIKTEVSKCSDNKNLPFTKLL- 372

Query 330 GTRNALLRRQCYVRAIGNFPQSLFLPVSILTIEGKLYAALSSLQTDVALCASEMGLEIGL 389
      C+++ + L LP+ ++ + +D+ C
Sbjct 373 -----CFLKTPQLDEEKLLLPVRRREIETEYFATMRMDIIQCGIATI----- 418

Query 390 VTAQVSSKIAFCQ 402
      + K+A C
Sbjct 419 --HSIEDKVADCA 429

```

```

> gb|AAV90688.1 putative 41 kDa salivary secreted basic protein [Aedes albopictus]
Length=332

```

```

Score = 190 bits (481), Expect = 3e-46, Method: Composition-based stats.
Identities = 80/343 (23%), Positives = 134/343 (39%), Gaps = 59/343 (17%)

Query 14  AAIGIIPWYVDAFLFTTPWNPQPRTINQLPVTSATSATPTQQSNVTLALGNRINTDTA 73
      ++ PW+ PW + S + +++GNR+NT+T+
Sbjct 20  PSLEASPW-----WPWQSR-----APSIINISIGNRVNVTNTS 53

Query 74  LTDYGTNVNGLGINVNR-----RRRDIWNIESNPVLAG----- 109
      + + GT++ L N++R + R + NI +
Sbjct 54  VDE-GTISRDLTFNLSRWKGNLTFEKGNTIETIRGNGGVNIIHIDFSSNSGNQRSSANR 112

Query 110 -LAANNPVNGSYIAIGNQVFHLPNNLSNVSNLNIASGSSGG-AGQTVPSNFSTFLPMI- PD 166
      +N S +F LP+ L ++ +G+ G +P + +P I
Sbjct 113 TTPLSNATQPSTSRKRAIFGLPS-LPSIPIPTLNGTQAFLGNSIPLPTAITIPAINAS 171

Query 167 NYTQAFQKLVTFQ-TLPLDAMDMSIVQTLSDAYSNTFKGLFTAAGLGLNETLEHGRSVI 225
      Q +Q L T + LP+ +D+ V L+ YS+T K + G+N L ET++ SV+
Sbjct 172 TLLQPWQPLQTLITRRPQMLDLDLAVSFLAQLYSSTAKSMLDT-GVNTLGETMDTSSVV 230

Query 226 EDGIQSIVDQGAQGFQVIASFNDSSARVQCVGPDLSPTSIGRRVVGKGTDCVNRKWRQ 285
      + +I DQ A G V SF + Q CVG P R VV K T CV +W +
Sbjct 231 NSTLDTIEDQVAVSAGIAGVQSFQKQLTRAGQSCVQG--VPDASARPVVTKATGCVRDRWNE 288

Query 286 LSDIGGRIAGDILAADRGASDFLGNLTTCNGANFNAAADASSGG 328
      L I + + + +L L CN NF + G
Sbjct 289 LDGIVNQFLVAVSDTEDAYGGWLRALDACNARNFAGLSDTGAG 331

```

```

> ref|YP\_078665.1 G phage related protein [Bacillus licheniformis ATCC 14580]
ref|YP\_091074.1 G hypothetical protein BLi01480 [Bacillus licheniformis ATCC 14580]

```



[gb|AAU23027.1](#) | **G** phage related protein [Bacillus licheniformis ATCC 14580]  
[gb|AAU40381.1](#) | **G** putative protein [Bacillus licheniformis ATCC 14580]  
Length=1020

GENE ID: 3030548 BL00969 | phage related protein  
[Bacillus licheniformis ATCC 14580] (10 or fewer PubMed links)

Score = 186 bits (470), Expect = 6e-45, Method: Composition-based stats.  
Identities = 37/336 (11%), Positives = 83/336 (24%), Gaps = 34/336 (10%)

```
Query 13 IAAIGIIPWYVDAFLFTTPWN-----PQPPRTINQLPVTSA SATTPTQQSNVTLAL 64
I + W F+ W+ P+ A + + L
Sbjct 556 IVELASTAWGSLTSFFSRLWSGITTTAQAAWTGFMNVLKPIWDGIVAVFGPTFNVIIVTTL 615

Query 65 GNRINTDTALTDYGTNVNGLGINVNRNRNRNRDIWNIESNPVLAGLAANNPNVNGSYIAIG 124
N NT ++ N I + +++ + + NG
Sbjct 616 SNWNVTSSSTVSSVWN---TIKTTLIGVVTIVDGVKNHFSILSQTLSGIWNGITSIAK 671

Query 125 NQVFHLPNNLSNVLSNIASGSSGAGQTVPSNFSTFLPMIPDNYTQAFQKLVTFQTLPL 184
L N + G V ++ Q + + +
Sbjct 672 GAWQVLKNAI-----LGPVLLVIDLVQGDGKGFANHLKQIWTNISNGAKQIWN 719

Query 185 DAMDSIVQTLSDAYSNTFKGLFTAA---GLNGLNETLEHGRSVIEDGIQSIVDQGAQGF 241
+ ++V +L N K + A N S+ ++V+ +
Sbjct 720 G-IKTVVSSLVKGLVNAVKNYWNTAKTVTTTIFNGIKSVLSSIWNGIKNTVVNLAKGLWN 778

Query 242 QVIASFNDSSARVQCVGPDLSPTSIGRRVVGKGTDCVNRKWRQLSDIGGRIAGDILAAD 301
V ++N + ++ V + +I + +
Sbjct 779 AVKTTWNTFKVTVTTFIFN---AVKTVLTTVWNAKSVV---INAAKNIWSSVRNFFNFMK 832

Query 302 RGASDFLGNLTCNGANFNAAADASSGGTGRNALRR 337
+ + N+ T +N A G + +
Sbjct 833 NVVTTVMKNVKTIIQNLWNNNAVKFLKGIDLKQIGKN 868
```

> [ref|XP\\_001850511.1](#) | **UG** salivary mucin [Culex quinquefasciatus]  
[gb|EDS32122.1](#) | **G** salivary mucin [Culex quinquefasciatus]  
Length=317

GENE ID: 6041218 CpipJ\_CPIJ008899 | salivary mucin [Culex quinquefasciatus]

Sort alignments for this subject sequence by:  
E value Score Percent identity  
Query start position Subject start position

Score = 176 bits (444), Expect = 6e-42, Method: Composition-based stats.  
Identities = 31/271 (11%), Positives = 74/271 (27%), Gaps = 11/271 (4%)

```
Query 140 NIASGSSGAGQTVPS-NFSTFLPMIPDNYTQA---FQKLVTFQTLPLDAMD SIVQTLS 195
N + G + T + N F +D V +++
Sbjct 53 NTPNNYQLSIGNRQNTFANLTDYGTMISNVNINLARFNGTAAAGNDAGATLDDAVLSVA 112

Query 196 DAYSNTFKGLFTAAGLNLNETLEHGRSVIEDGIQSIVDQGAQGFQVIASFNDSSARVQ 255
+AY N + ++ + RS Q I D A S +
Sbjct 113 EAYRNESTAVIAGRLAWFNQIAQANRSASTVHHQHISDLVEDFARDTRAGTLGLSNATR 172

Query 256 QCVGPDLSPTSIGRRVVGKGTDCVNRKWRQLSDIGGRIAGDILAADR GASDFLGNLTTC 314
C+ + + R V + C+ K +++ ++ + ++ + L C
Sbjct 173 DCLARSVQVEDVIRSVENRSEGGCLRAKIQRMLELRAEASSNLTEFLESQQNVEDRLEIC 232

Query 315 NGANFNAAADASSGGTGRNALRRQCVRAIGNFPQSLFLPVSLTIEGGKLYAALSSLQ 374
+ + C + + + L ++ + + L+
Sbjct 233 VD-----LQDDFDDMSDFYKACVSSILFDVQMETAKLELTAEELTAEAGTVVRQLRA 286

Query 375 DVALCASEMGLEIGLVTAQVSSKIAFCQLAQ 405
+ C ++ + ++ I C A+
Sbjct 287 GLEECVVDVANYAFDASMKLRHWINVC SAAR 317
```

Score = 52.4 bits (123), Expect = 1e-04, Method: Composition-based stats.  
Identities = 21/83 (25%), Positives = 38/83 (45%), Gaps = 1/83 (1%)

```
Query 9 LALLIAAIGIIPWYVDAFLFTTPWNPQPPRTINQLPVTSA SATTPT-QQSNVTLALGNR 67
L + + + P AF + +S++++ +N L++GNR
Sbjct 6 LLVTLVISLSP EATLAFGNWLLGFATTASSTTSSTSSSTS AASSNTPNNYQLSIGNR 65

Query 68 INTDTALTDYGTNVNGLGINVNR 90
NT LTDYGT ++ + IN+ R
Sbjct 66 QNTFANLTDYGTMISNVNINLAR 88
```

> [gb|ACI30188.1](#) | putative 41.9 kDa basic salivary protein [Anopheles darlingi]  
Length=173

Score = 173 bits (437), Expect = 4e-41, Method: Composition-based stats.  
Identities = 167/173 (96%), Positives = 169/173 (97%), Gaps = 0/173 (0%)

```
Query 234 DQGAQGFQVIASFNDSSARVQCVGPDLSPTSIGRRVVGKGTDCVNRKWRQLSDIGGRI 293
DQGAQGFQVIASFNDSSARVQCVG DLSPPTSIGRRVVGKGTDCVNR+WRQLSDIGGRI
Sbjct 1 DQGAQGFQVIASFNDSSARVQCVGSDLSPTSIGRRVVGKGTDCVNRWRQLSDIGGRI 60

Query 294 AGDILAADR GASDFLGNLTCNGANFNAAADASSGGTGRNALRRQCVRAIGNFPQSLLF 353
AGDILA DRGASDFLGNLTCNGANFNAAADASSGGTGRNALRRQCVRAIGNFPQSLLF
Sbjct 61 AGDILAVDR GASDFLGNLTCNGANFNAAADASSGGTGRNALRRQCVRAIGNFPQSLLF 120

Query 354 LPVSLTIEGGKLYAALSSLQTDVVALCASEMGLEIGLVTAQVSSKIAFCQLAQ 406
LPVSLTI+GGKLYAALSSLQTD ALCASEMGLEIGLVTAQVSSKI FCQLAQ
Sbjct 121 LPVSLTIDGGKLYAALSSLQTDALCASEMGLEIGLVTAQVSSKITFCQLAQ 173
```

> [ref|XP\\_002388385.1](#) | **G** hypothetical protein MPER\_12601 [Moniliophthora perniciosa FA553]  
[gb|EEB89315.1](#) | **G** hypothetical protein MPER\_12601 [Moniliophthora perniciosa FA553]  
Length=693

GENE ID: 7931429 MPER\_12601 | hypothetical protein  
[Moniliophthora perniciosa FA553] (10 or fewer PubMed links)

Score = 167 bits (422), Expect = 2e-39, Method: Composition-based stats.  
Identities = 35/323 (10%), Positives = 79/323 (24%), Gaps = 39/323 (12%)

```

Query 38 RTINQLPVTSAATPTTQQSNVTLALGNRINTDTALTDTYGTNVNGLGINVNRRRRRRD 97
      + A+ T S T+ G+ + + + T G
Sbjct 221 SLNKGSTTSQASDTATIPAPSIKTMKAGD---SSSIRDETATVKTG-----EG 265

Query 98 IWNIESNPVLAGLAANNPVNGSYIAIGNQVFLPNNLSNVSLNIASGSSGGAGQTVPSNF 157
      N S ++ P ++ L+ ++ A G +
Sbjct 266 TINAGSVSGTPTSSPPPT---ISTAPAPAILAASGLTATTIGTAR--PPGVRPVKRLSP 320

Query 158 STFLPMIPDNYTQAFQKLVTFQTLPLDAMDSDIVQTLSDAYSNTFKGLFTAAGLNLNET 217
      + D+ Q L T + ++D+ V T + GL + +E+
Sbjct 321 RLYFAHFVDHMEQFVVFLETVAKRRWDQSLDIDVDTKAKTNGAAENGLVDSFVDEEDES 380

Query 218 LEHGR-SVIEDGIQSIQVVDQ----GAQGFQVVIASFNDSARVQCVGPDLSPTSIGRRV 271
      + +V ++ + + A Q + D ++ D+ +
Sbjct 381 EKKDQVAVWNTLLELYLTLPGVSATATSPAQNEETLRD--KAIRILQSKDIPYDPHTALI 438

Query 272 VGKGTDCVNRKWRQLSDIGGRIAGDILAADRASDFLGNLTTTCNGANFNAAADASSGGTGT 331
      + C T L + + + + ++ A+
Sbjct 439 LCSSHGCTG---LVLWLEK---MGMYEDVLRFWMDRKEGV---SEASAEVVRHLRM 487

Query 332 RNALRRQCYVRAIGNFPQSLFL 354
      R Y + S L
Sbjct 488 YGPQRPHLYPLVLRFLTSSSELL 510

```

> [gb|AAx54873.1|](#) putative 30.3 kDa secreted protein [*Aedes aegypti*]  
Length=295

Score = 162 bits (409), Expect = 6e-38, Method: Composition-based stats.  
Identities = 66/306 (21%), Positives = 109/306 (35%), Gaps = 54/306 (17%)

```

Query 5 MSVVLALLIAAIGIIPWYVDAFLFTTPWNPQPPRTINQLPVTSAATPTTQQSNVTLAL 64
      +SV+ LI ++ PW+ PW + S VT+++
Sbjct 11 LSVMLGLFLIPSLLEASPFW-----WPWQSRA-----SPSIVTISI 44

Query 65 GNRINTDTALTDTYGTNVNGLGINVNR---RRRDIWNIESNPVLAG 109
      GNR N+++ +TD GT++ L N++R + R + NI +
Sbjct 45 GNRFNNSNS-VTDEGTSIRDLTFLNLSRWKGNLTFEKNGTIELITRGNLGVNINIHIDFGSNS 103

Query 110 LAANN---PVNGSYIAIGNQVFLPNNLSNVSLNIASGSSGGAG-QTVPSNFSTFLP-MI 164
      + N P N + ++F LP+ L + + +G+ G P
Sbjct 104 KSQQNETVPSNATQSRKKREIFGLPS-LPAIPIPTINGTQAAIGENFPQLPNEIANPASN 162

Query 165 PDNYTQAFQKLVTFQTLPLDAMDSDIVQTLSDAYSNTFKGLFTAAGLNLNETLEHGRS 223
      N+ Q +Q L T + LP+ +D+ V LS YS+T K + L L ET+ H
Sbjct 163 ASNFLQPWFQLQLTTRRLPMQFLDTAVSYLSQLYSSTAKNMLGHRELTPLAETMGHPSP 222

Query 224 VIEDGL-QSIVDQG-AQGFQVVIASFNDSARVQCVGPDLSPTSIGRRVVGKGT--DC 278
      V + + DQ + F Q CV P +V K
Sbjct 223 VSSTPWTTSRDQTVGRNPRGSHIPFRGTFLKLAQSCVWPRCPDECCFSPIVTKAHRDGV 282

Query 279 VNRKWR 284
      +W
Sbjct 283 TGIRWE 288

```

> [gb|AAU06485.1|](#) unknown salivary protein [*Culicoides sonorensis*]  
Length=243

Score = 161 bits (406), Expect = 2e-37, Method: Composition-based stats.  
Identities = 47/228 (20%), Positives = 77/228 (33%), Gaps = 10/228 (4%)

```

Query 175 LVTQFQTLPLDAMDSDIVQTLSDAYSNTFKGLFTAAGLNLNETLEHGRSVIEDGIQSIQV 234
      + +L ++S + L ++ K N L +SV I
Sbjct 18 VSNLGNLSNGTVESALDNLQSKVNDAAKRANDT---TNSALSGLQSVGNTLSNEINK 72

Query 235 QGAQGFQVVIASFNDSARVQCVGPDLSPTSIG-RRVVGKGTDCVNRKWRQLSDIGGRI 293
      QV ++ S+ ++ CV + +P S + CV K + I
Sbjct 73 VSKSABEAVNSTMKGLSSDIRCVNQNNGNPGSAAKKTAKTSAQKCVQDKIDEAKSIINGT 132

Query 294 AGDILAADRASDFLGNLTTTCNGANFNAAADASSGGTGRNALRRQCYVRAIGNFPQSLLF 353
      DI A G GNL+ C+ + T NA + C A+ + L
Sbjct 133 RNDIQAKLGVVYLRGNLSNCHLN---VSMNLASLPTFNASQPACLASALLSVQSETLL 188

Query 354 LPVSLTIEGKLYAALSSLQTDVALCASEMGLEIGLVTAQVSSKIAFC 401
      +P+SL G + + LQ C + + EI T S +A C
Sbjct 189 IPLSLASHGAQAVGLVQGLQGYAMKCMANLMEETAKATLSTLSVAKC 236

```

> [gb|ACH56926.1|](#) hypothetical protein [*Simulium vittatum*]  
Length=236

Score = 156 bits (394), Expect = 4e-36, Method: Composition-based stats.  
Identities = 39/237 (16%), Positives = 80/237 (33%), Gaps = 12/237 (5%)

```

Query 169 TQAFQKLVTFQTLPLDAMDSDIVQTLSDAYSNTFKGLFTAAGLNLNETLEHGRSV---I 225
      + F Q + + V L++ + + NGL+ V
Sbjct 2 SNPFHTFAELGQK---GLIPNPVEILANLSMDHLENKVKDHNNGLSNVQNGVYEVQTFG 58

Query 226 EDGIQSIQVQGAQGFQVVIASFNDSARVQCVGPDLSPT-SIGRRVVGKGTDCVNRKWR 284
      I I + A + + N + V CV P ++ + + CV K
Sbjct 59 SKLINFIPNLAANAIKDIQNMIN--LSGVVSCVNKQPLPFSNVIQVAASAKSACVAEKVD 116

Query 285 QLSDIGGRIAGDILAADRASDFLGNLTTTCNGANFNAAADASSGGTGRNALRRQCYVRAI 344
      Q ++I A ++ A + ++ C+ + + S CY A+
Sbjct 117 QAANIWNNTADNLRNASNDLQNLRDSINDCSQRISGSLGLSLSDAM---ALNTCYAAL 173

Query 345 GNFPQSLFLPVSILTIEGKLYAALSSLQTDVALCASEMGLEIGLVTAQVSSKIAFC 401
      N + LP+++ + + +SL+ + C + + +I + S IA C
Sbjct 174 INVQSETILLPITIGQKIAEGVDWANSKGYMVKCVANLAQDIATQAFKASQATAK 230

```

> [gb|ACI30197.1|](#) putative 41.9 kDa basic salivary protein [*Anopheles darlingi*]  
Length=139

Score = 149 bits (375), Expect = 6e-34, Method: Composition-based stats.  
Identities = 138/139 (99%), Positives = 138/139 (99%), Gaps = 0/139 (0%)

```

Query 268 GRRVVGKGTDCVNRKWRQLSDIGGRIAGDILAADRASDFLGNLTTTCNGANFNAAADASSG 327
      GRRVV KGTDCVNRKWRQLSDIGGRIAGDILAADRASDFLGNLTTTCNGANFNAAADASSG
Sbjct 1 GRRVVRKGTDCVNRKWRQLSDIGGRIAGDILAADRASDFLGNLTTTCNGANFNAAADASSG 60

```

Query 328 GTGTRNALRRQCYVRAIGNFPQSLFLPVSLLTIEGGKLYAALSSSLQTDVALCASEMGLEI 387  
 Sbjct 61 GTGTRNALRRQCYVRAIGNFPQSLFLPVSLLTIEGGKLYAALSSSLQTDVALCASEMGLEI 120

Query 388 GLVTAQVSSKIAFCQLAQL 406  
 Sbjct 121 GLVTAQVSSKIAFCQLAQL 139

> [gb|ABF18165.1](#) putative salivary mucin [*Aedes aegypti*]  
 Length=248

Sort alignments for this subject sequence by:  
 E value [Score](#) [Percent identity](#)  
[Query start position](#) [Subject start position](#)

Score = 149 bits (375), Expect = 6e-34, Method: Composition-based stats.  
 Identities = 26/200 (13%), Positives = 61/200 (30%), Gaps = 11/200 (5%)

Query 147 GGAGQTVPSNFSFLPMPIDNYTQAFQKL--VTQFQTLPLDAMDSIVQTLSDAYSNTFKG 204  
 G +N S + N + + + + T+ + Y N +  
 Sbjct 55 ISIGNRENTNASIDYGTMIITNLQINLARFNGSALLGDATENRLENEVIYTVLEGYRNRSEA 114

Query 205 LFTAAGLNGLNLEHGRSVIEDGIQSIQVQGAQGFQVIASFNDSARVQCCVGPDLSP 264  
 + + + L + + + Q E V S + V + C+ + +  
 Sbjct 115 MVSRLAWIDEVLLDIVQYARQLRQDENNRWLKQFPEHVRTSVAQLNETVRSCLEREVVV 174

Query 265 TSIGRRVVGKG-TDCVNRKWRQLSDIGGRIAGDILAADRGASDFLGNLTCNGANFNAAD 323  
 + V + + C+ + ++L ++ ++ A D L TC +F+ A  
 Sbjct 175 EELIHAVENRNRSGCLEGRQLKLFELREVAKNNLTFELASAGLEDRLTECVNPFDDAL 234

Query 324 ASSGGTGTNRALRRQCYVRA 343  
 N + C  
 Sbjct 235 D-----NVYQEACISSV 246

Score = 48.2 bits (112), Expect = 0.002, Method: Composition-based stats.  
 Identities = 19/71 (26%), Positives = 35/71 (49%), Gaps = 3/71 (4%)

Query 20 PWYVDAFLFTWPNPQPRTINQLPVTATSATPTQSSNVTLALGNRINTDALTLDYGT 79  
 P +AF ++ W T + + + S +++GNR NT+ ++ DYGT  
 Sbjct 15 PTGTFNFGWS--WFFPRQTTTTASSGTTSSNAVPSMYNISIGNRENTNASI-DYGT 71

Query 80 NVNGLGINVNR 90  
 + L IN+ R  
 Sbjct 72 MITNLQINLAR 82

> [ref|XP\\_771922.1](#) **UG** hypothetical protein CNBN1020 [*Cryptococcus neoformans* var. *neoformans* B-3501A]

[gb|EAL17275.1](#) **G** hypothetical protein CNBN1020 [*Cryptococcus neoformans* var. *neoformans* B-3501A]  
 Length=1071

[GENE ID: 4939711 CNBN1020](#) | hypothetical protein  
 [*Cryptococcus neoformans* var. *neoformans* B-3501A]

Score = 136 bits (342), Expect = 4e-30, Method: Composition-based stats.  
 Identities = 25/232 (10%), Positives = 56/232 (24%), Gaps = 28/232 (12%)

Query 149 AGQTVPSNFSFLPMPIDNYTQAFQKLVTFQTLPLDAMDSIVQTLSDAYSNTFKGLFTA 208  
 VP++ + D+ L + L +D + S + K A  
 Sbjct 700 TPSYVPASPRQYFAHFVDHRELFIFHLESVALNLWNQKVDPSISNSSTT--SAPKRMDMA 757

Query 209 AGLNGLNETLEHGRSVIEDGIQSIQVQGAQGFQVIASFNDSARVQCCVGPDLSPSISG 268  
 + T+ +V ++ + A S + A + +  
 Sbjct 758 P--PPTDPTVIDQTAVWNTLLELYLSSA-----EQSKRKALALINS---DSTPYDPMH 806

Query 269 RRVVVGKGTDCVNRKWRQLS-DIGGRIAGDILAADRGASDFLGNLTCNGANFNAADASSG 327  
 V+ +R+ + + + + ++ A + +  
 Sbjct 807 ALVLCSSVG----FREGMVRWEG---MGMYEDVLRYYMDEGQEAEDAQGITPSSKVF 857

Query 328 G-TGTRNALRRQCYVRAIGNFPQSLFLPVSLLTIEGGKLYAALSSSLQTDVAL 378  
 Y + S P LT G+L L+ + +  
 Sbjct 858 THLEMYGPSHPHLYPLVRLYLTSS---PAILTRHKGELSKILAKIDEYQIM 905

> [ref|XP\\_568542.1](#) **G** vacuolar membrane protein [*Cryptococcus neoformans* var. *neoformans* JEC21]

[gb|AAW47025.1](#) **G** vacuolar membrane protein, putative [*Cryptococcus neoformans* var. *neoformans* JEC21]  
 Length=1071

[GENE ID: 3255360 CNN01020](#) | vacuolar membrane protein  
 [*Cryptococcus neoformans* var. *neoformans* JEC21] (10 or fewer PubMed links)

Score = 136 bits (341), Expect = 5e-30, Method: Composition-based stats.  
 Identities = 25/232 (10%), Positives = 56/232 (24%), Gaps = 28/232 (12%)

Query 149 AGQTVPSNFSFLPMPIDNYTQAFQKLVTFQTLPLDAMDSIVQTLSDAYSNTFKGLFTA 208  
 VP++ + D+ L + L +D + S + K A  
 Sbjct 700 TPSYVPASPRQYFAHFVDHRELFIFHLESVALNLWNQKVDPSISNSSTI--SAPKRMDMA 757

Query 209 AGLNGLNETLEHGRSVIEDGIQSIQVQGAQGFQVIASFNDSARVQCCVGPDLSPSISG 268  
 + T+ +V ++ + A S + A + +  
 Sbjct 758 P--PPTDPTVIDQTAVWNTLLELYLSSA-----EQSKRKALALINS---DSTPYDPMH 806

Query 269 RRVVVGKGTDCVNRKWRQLS-DIGGRIAGDILAADRGASDFLGNLTCNGANFNAADASSG 327  
 V+ +R+ + + + + ++ A + +  
 Sbjct 807 ALVLCSSVG----FREGMVRWEG---MGMYEDVLRYYMDEGQEAEDAQGITPSSKVF 857

Query 328 G-TGTRNALRRQCYVRAIGNFPQSLFLPVSLLTIEGGKLYAALSSSLQTDVAL 378  
 Y + S P LT G+L L+ + +  
 Sbjct 858 THLEMYGPSHPHLYPLVRLYLTSS---PAILTRHKGELSKILAKIDEYQIM 905

> [ref|XP\\_310399.1](#) **UG** AGAP003841-PA [*Anopheles gambiae* str. PEST]  
[emb|CAC35525.1](#) hypothetical protein [*Anopheles gambiae*]

[gb|EAA05987.2|](#) **G** AGAP003841-PA [Anopheles gambiae str. PEST]  
Length=195

[GENE\\_ID: 1271577\\_AgaP\\_AGAP003841](#) | AGAP003841-PA [Anopheles gambiae str. PEST]  
(10 or fewer PubMed links)

Score = 125 bits (313), Expect = 9e-27, Method: Composition-based stats.  
Identities = 50/195 (25%), Positives = 80/195 (41%), Gaps = 9/195 (4%)

```
Query 1 MNRSMVVLALLIAAIGIIPWYVDAFLFTTPWNPQ--PPRTINQLPVTSATSATTPTQQS 58
M + + LL AA+ + P + PW+ P T + +++ + S
Sbjct 1 MLQMRIISVPLLSAAVLLQPLLAAPIFWFLPWSFPALSPITTTTLATTSGTAASSGASNS 60

Query 59 NVTLALGNRINTDALTLDYGTNVNGLGINVNRNRNRNRDIWNIESNPVLAGLAANFPVNG 118
NV++A+G+R NT T L DYGTN+ + INVNR RR D + L A NG
Sbjct 61 NVSVAIGNRVNTSTGLDDYGTNITNVQINVNRMRRAVTDADLAKLERKLRQAADGEGSTNG 120

Query 119 SYIAIGNQVFLPNLNSVSLNI--ASGSSGGAGQTVPSNFSFLPM-----IPDNYTQA 171
+ I IG LP+N+SN+++N +G + +T +
Sbjct 121 TVITIGHEHTIRLPHNISNLTVNTYLINGIPENYMLADTGSATINANETYTPLLSAIRLF 180

Query 172 FQKLVTFQFTLPLDA 186
+ F
Sbjct 181 KNFFSLSFKSQSQSQT 195
```

> [gb|AAR18443.1|](#) putative threonine/serine-rich mucin [Culex quinquefasciatus]  
Length=173

Score = 125 bits (312), Expect = 1e-26, Method: Composition-based stats.  
Identities = 52/180 (28%), Positives = 85/180 (47%), Gaps = 13/180 (7%)

```
Query 1 MNRSMVVLALLIAAIGIIPWYVDAFLFTTPWNPQ--PPRTINQLPVTSATSATTPTQQS 58
M R + + + + + + A + + PW+ P T + TS+TS T S
Sbjct 1 MTRVQTYLIVLIVSAL-FSTTLGSPIFWLLPWSSWLNPSSTSSSTSGTSTSTATARTPS 59

Query 59 NVTLALGNRINTDALTLDYGTNVNGLGINVNRNRNRNRDIWNIESNPVLAGLAANFPVNG 118
NV++A+G+R NT L D GT ++GL IN RRRR + P + + P N
Sbjct 60 NVSIAIGDRNTTAGLDDMGTVIDGLTINAGRNRSS-----AQQLEPVDVFI---PSNE 110

Query 119 SYIAIGNQVFLPN-NLSNVSLNIASGSSGGAGQTVPSNFSFLPMIPDNYTQAFQKLV 177
SY+ IGN V LP+ N+SN+++N+ G +P+ P + D+ F +
Sbjct 111 SYVIGNHVIRLPSRNSINITINVVGDVGPVYVAGGLPAPPQDVPPNLFDHKINFFDGVFN 170
```

> [ref|XP\\_001864883.1|](#) **UG** threonine/serine-rich mucin [Culex quinquefasciatus]

[gb|EDS40846.1|](#) **G** threonine/serine-rich mucin [Culex quinquefasciatus]  
Length=173

[GENE\\_ID: 6047887\\_CpipJ\\_CPIJ014439](#) | threonine/serine-rich mucin  
[Culex quinquefasciatus]

Score = 122 bits (305), Expect = 7e-26, Method: Composition-based stats.  
Identities = 48/180 (26%), Positives = 82/180 (45%), Gaps = 13/180 (7%)

```
Query 1 MNRSMVVLALLIAAIGIIPWYVDAFLFTTPWNPQPPRTINQLPVTSATSATT--PTQQS 58
M R + + + + + + A + + PW+ + + +S +T S
Sbjct 1 MTRVQTYLIVLIVSAL-FSTTLGSPIFWLLPWSSWLNPSSTSSSTSGTSTSTATARTPS 59

Query 59 NVTLALGNRINTDALTLDYGTNVNGLGINVNRNRNRNRDIWNIESNPVLAGLAANFPVNG 118
NV++A+G+R NT L D GT ++GL IN RRRR + P + + P N
Sbjct 60 NVSIAIGDRNTTAGLDDMGTVIDGLTINAGRNRSS-----AQQPEVDVFI---PSNE 110

Query 119 SYIAIGNQVFLPN-NLSNVSLNIASGSSGGAGQTVPSNFSFLPMIPDNYTQAFQKLV 177
SYI IGN V LP+ N+SN+++N+ G +P+ P + D+ F +
Sbjct 111 SYIQIGNHVIRLPSRNSINITINVVGDVGPVYVAGGLPAPPQDVPPNLFDHKINFFDGVFN 170
```

> [ref|XP\\_001841204.1|](#) **G** hypothetical protein CC1G\_10201 [Coprinospis cinerea okayama7#130]

[gb|EAU80634.1|](#) **G** hypothetical protein CC1G\_10201 [Coprinospis cinerea okayama7#130]  
Length=1003

[GENE\\_ID: 6017881\\_CC1G\\_10201](#) | hypothetical protein  
[Coprinospis cinerea okayama7#130]

Score = 121 bits (302), Expect = 2e-25, Method: Composition-based stats.  
Identities = 35/361 (9%), Positives = 84/361 (23%), Gaps = 42/361 (11%)

```
Query 10 ALLIAAIGIIPWYVDAFLFTTPWNPQPPRTINQLPVTSATSATTPTQQSNVTLALGNRIN 69
L I + + + + + P S TL R
Sbjct 611 PLAIAKQPTPTTATTTTYSLSYLALNRSTTVPTVVSSETQTVAAAPPSPSIKTL----RAE 666

Query 70 TDTALTDYGTNVNGLGINVNRNRNRNRDIWNIESNPVLAGLAANFPVNGSYIAIGNQVFH 129
+ D +V+G S ++ V+
Sbjct 667 GASGRD--GSVDGATP-----PPSGSAFGVSTAVVGANVDVGTALAHGAGAG 712

Query 130 LPNLSNVSLNIASGSSGGAGQTVPSNFSFLPMIPDNYTQAFQKLVTFQFTLPLDAMDS 189
+ L S G + S + D+ Q L T ++D
Sbjct 713 AVSGLPPRSSTAPPEPPAGPPVQRLSPSLYFSHFVDHMQQFVVFLVAVRRWQGSVDD 772

Query 190 -IVQTLSDAYSNTFKG-----LFTAAGLNLNETLEHGR--SVIEDGIQSIVDQG 236
+S +G L+ + + +V ++ +
Sbjct 773 RDNSGEVGVWSEKQGGQPENENQGAEDTHHLDDIAQAQDRQDQIAVWNTLLELYLTLPL 832

Query 237 AQQFEQVIASFNDSS---ARVQQCVGPDLSPTSIGRRVVGKGTDCVNRKWRQLSDIGGRI 293
A+ E A F++S ++ ++ + ++ L + +
Sbjct 833 AKDNESDRAVDFDESKMREKALRVLSREIPYDTHALILCSTHAFT----DGLVLLWEK- 887

Query 294 AGDILAADRGASDFLGNLTTCCNGANFNAADASSGGTGRNLRQCYVRAIGNFPQSLLF 353
+ + ++ + + NA++ Y + +
Sbjct 888 ---LGMVEDVLRFWIDRHNSDPLSYPNASNKVVENLMLYGPQHPNLYPLVLRFLTSTEEL 944

Query 354 L 354
L
Sbjct 945 L 945
```

> [gb|ABI83794.1|](#) gSG10 salivary mucin [Anopheles funestus]  
Length=190

Score = 114 bits (283), Expect = 3e-23, Method: Composition-based stats.  
Identities = 46/190 (24%), Positives = 75/190 (39%), Gaps = 14/190 (7%)

```
Query 3  RSMVVLLALLIAAIGIIPWYVDAFLFTTPWNPQPPRTINQLPVTSAATPTQQSN--- 59
+ ++ LL A+ P + PW+ T + +S + + T ++
Sbjct 1  QIRIIIIAPLLSVAVLTQPLLAAPIFWFLPWSFPNFTTSSSTSSSTSGTASSTSGASNSS 60

Query 60  -VTLALGNRINTDALTLDYGTNVNGLGINVNRNRNRNRDIWNIESNPVLAGLAANNPVNG 118
V++A+GNR+NT T L DYGTN+ + INVNR RR + + L A N
Sbjct 61  NVSVAIGNRVNTSTGLDDYGTNITNVQINVNRMRRAITENDLAK---LERRYARQTANE 116

Query 119 SYIAIGNQVFLHPNPNLSNVSLNI--ASGSSGGAGQTVPSNFST---FLPMIPDNYTQAF 172
S I IG LP N+SN+++N +G + + +
Sbjct 117 STITIGEHTIRLPANISNLTNTYLYLINGIPDSTMNLPDGTMTINTDEASTPLLTAVNIFK 176

Query 173 QKLVTFQFQL 182
L + F
Sbjct 177 NFLSSFFGKQ 186
```

> [ref|XP\\_001661479.1|](#) **UG** hypothetical protein AaeL\_AAE011183 [Aedes aegypti]  
[gb|ABF18096.1|](#) putative mucin [Aedes aegypti]  
[gb|EAT36759.1|](#) **G** conserved hypothetical protein [Aedes aegypti]  
Length=180

[GENE ID: 5574465 AaeL\\_AAE011183](#) | hypothetical protein [Aedes aegypti]  
(10 or fewer PubMed links)

Score = 106 bits (263), Expect = 6e-21, Method: Composition-based stats.  
Identities = 46/179 (25%), Positives = 77/179 (43%), Gaps = 13/179 (7%)

```
Query 5  MSVVLALLIAAIGIIPWYVDAFLFTTPWNPQPPRTINQLPVTSAATPTQQSNVTLAL 64
S+V+AL + A+ V F F + + + S++S++T + +++
Sbjct 6  FSIVVALTLCAVLPSTLGVPIFWFPWSYLLPTTSSSSASGTASSSSSTTLRPIMANISI 65

Query 65  GNRINTDALTLDYGTNVNGLGINVNRNRNRNRDIWNIESNPVLAGLAANNPVNGSYIAIG 124
GNR NT + D GT +NGL I+ RR + N S + S+I +G
Sbjct 66  GNRNTSA-MVDSGTVINGLTIISRRRDVPLETLRNDPSV-----TSESFIQVG 113

Query 125 NQVFHL -PNNLSNVSLNIASGSSGGAGQTVPSNFSTFLPMIPDNYTQAFQKLVTFQFQL 182
NQV L P N+++N+NI G G T S + + F ++ F L
Sbjct 114 NQVIRLPPGNVANLITINI IDGVVYVFGNTESDVSSGSATGSSEGSGLFSRVRNFFGDL 172
```

> [gb|ACI30119.1|](#) gSG10 salivary mucin [Anopheles darlingi]  
Length=192

Score = 102 bits (253), Expect = 8e-20, Method: Composition-based stats.  
Identities = 56/187 (29%), Positives = 87/187 (46%), Gaps = 9/187 (4%)

```
Query 2  NRSMSVLLALLIAAIGIIPWYVDAFLFTTPWNPQPPR--TINQLPVTSAATPTQQSN 59
RS +++ LL AA+ P + PW+ T + TS++++ + SN
Sbjct 1  MRSSQILVHLLSAALLAQPLLAAPIFWFLPWSFPNFTTSSSTSGTSSSSASNGASNSSN 60

Query 60  VTLALGNRINTDALTLDYGTNVNGLGINVNRNRNRNRDIW---NIESNPVLAGLAANNPV 116
V++A+GNR+NT T L DYGTN+ + INVNR+RR + + N + G A
Sbjct 61  VSVIAIGNRVNTSTGLDDYGTNITNVQINVNRQRRSVANTFNLNLDLGDGGGGDDAEADT 120

Query 117 NGSYIAIGNQVFLHPNPNLSNVSLNI--ASGSSGGAGQTVPSNFSTFLPM--IPDNYTQAF 172
GSYI+IG + LP N+SN+LN +G VPS + +
Sbjct 121 GGSYISIGEHIIRLPANISNLTNTYLYLINGLPVDESMAVPSSEMGSAGETNLLVTTIRLFR 180

Query 173 QKLVTFQF 179
L +
Sbjct 181 NFLKSFL 187
```

> [gb|ACI30120.1|](#) gSG10 salivary mucin [Anopheles darlingi]  
Length=193

Score = 99.0 bits (244), Expect = 8e-19, Method: Composition-based stats.  
Identities = 54/188 (28%), Positives = 85/188 (45%), Gaps = 10/188 (5%)

```
Query 2  NRSMSVLLALLIAAIGIIPWYVDAFLFTTPWNPQPPR--RTINQLPVTSAATPTQQSN 59
RS +++ LL AA+ P + PW+ T + TS++++ + SN
Sbjct 1  MRSSQILVHLLSAALLAQPLLAAPIFWFLPWSFPNFTTSSPSGTSASSASSGASNSSN 60

Query 60  VTLALGNRINTDALTLDYGTNVNGLGINVNRNRNRNRDIW---NIESNPVLAGLAANNPV 116
V++A+GNR+NT T L DYGTN+ + INV R+RR + + N + G A
Sbjct 61  VSVIAIGNRVNTSTGLDDYGTNITNVQINVNRQRRSVANTFNLNLDLGDGGGGDDAEADT 120

Query 117 NGSYIAIGNQVFLHPNPNLSNVSLNI--ASGSSGGAGQTVPSNFSTFLPM---IPDNYTQA 171
GSYI+IG + LP N+SN+LN + VPS + +
Sbjct 121 GGSYISIGEHIIRLPANISNLTNTYLVNRVPVDESMAVPSSEMDGNAGETNLLVTTIRLF 180

Query 172 FQKLVTFQF 179
L +
Sbjct 181 RNFLKSFL 188
```

> [gb|ACI30122.1|](#) gSG10 salivary mucin [Anopheles darlingi]  
Length=199

Score = 97.1 bits (239), Expect = 3e-18, Method: Composition-based stats.  
Identities = 53/194 (27%), Positives = 82/194 (42%), Gaps = 16/194 (8%)

```
Query 2  NRSMSVLLALLIAAIGIIPWYVDAFLFTTPWNPQPPRTINQLPVTSAATPTQQSN-- 59
RS +++ LL AA+ P + PW+ T S +S ++
Sbjct 1  MRSSQILVHLLSAALLAQPLLAAPIFWFLPWSFPNFTTSSSTSGTSSSTSSASSGASN 60

Query 60  ---VTLALGNRINTDALTLDYGTNVNGLGINVNRNRNRNRDIWNIESN-----PVLG 109
V++A+GNR+NT T L DYGTN+ + INVNR+RR + + + G
Sbjct 61  SSVNSVAIGNRVNTSTGLDDYGTNITNVQINVNRQRRSVANTFNLNLDLGDGGGGGGGG 120

Query 110 LAANNPVNGSYIAIGNQVFLHPNPNLSNVSLNI--ASGSSGGAGQTVPSNFSTFLPM--IP 165
A GSYI+IG + LP N+SN+LN +G VPS + +
Sbjct 121 DDAKADTGGSYISIGEHIIRLPANISNLTNTYLYLINGLPVDESMAVPSVMGSAGETNVLV 180

Query 166 DNYTQAFQKLVTFQF 179
L +
```

Sbjct 181 TTIRLFRNLIKLSFL 194

> [gb|ABJ97695.1](#) putative threonine/serine-rich mucin [Toxorhynchites amboinensis]  
Length=172

Score = 80.9 bits (197), Expect = 2e-13, Method: Composition-based stats.  
Identities = 40/156 (25%), Positives = 65/156 (41%), Gaps = 14/156 (8%)

Query 34 P QP PRTINQLP VTSATSATPTTQQSNVTLALGNRINTDALTDTYGTNVNGLGINVNRRRR 93  
 P + TS+TS++T N T++LGNR NT + D GTN++GL I+ ++R

Sbjct 17 FGMPTTYTSGTSSSTSSSTARSFVNATISLGNRENTSA-VEDLGTNIDGLTISRKRFRV 75

Query 94 R-----RRDIWNIESNPVL-----AGLAANNPVNGSYIAIGNQVFHL-PNNLSNVSLNI 141  
 ++ P + A + N S I +GNQ+ L P +SN++++I

Sbjct 76 PLLIPNVTGFSFQNLPGIFTRQKRAAESIPPLSNESVIRVGNQIIKLPPIRGISNLTIIH 135

Query 142 ASGSSGGAG-QTVP SNFSTFLPMIPDNYTQAFQKLV 176  
 G S + + D F L

Sbjct 136 IDGGSYSEKFTPFQTPANGTWAPFVDQIKNFDFGLF 171

> [ref|XP\\_001882977.1](#) predicted protein [Laccaria bicolor S238N-H82]  
[gb|EDR06605.1](#) predicted protein [Laccaria bicolor S238N-H82]  
 Length=1039

GENE ID: 6078472 LACBIDRAFT 251110 | hypothetical protein [Laccaria bicolor S238N-H82] (10 or fewer PubMed links)

Score = 55.1 bits (130), Expect = 2e-05, Method: Composition-based stats.  
Identities = 19/221 (8%), Positives = 47/221 (21%), Gaps = 23/221 (10%)

Query 138 SLNIASGSSGGAGQTV---PSNFSTFLPMIPDNYTQAFQKLVTFQTLPLDAMD SIVQTL 194  
 N + + P DN Q L T ++D T

Sbjct 656 KSNTPFAPPKSPSPSPHRLSPKLYFPFHVNDVDQFLVPLETVAVRRWNQSVDPPTPTP 715

Query 195 SDAYSNTFKGLFTAAGLNGLNLEHGRSVIEDGIQSIVDQGAQGFEQVIASFNDSSARV 254  
 A+ G+ +V ++ + G + +

Sbjct 716 GMVGVGGVEPPDASDEVEGEMDRRDQVAVWNTLLELYLTLPLPGGAR-----KEAM 767

Query 255 QQCVGPDLSPTSIGRRVVGKGTDCVNRKWRQLSDIGGRIAGDILAADR GASDFLGNLTTC 314  
 +L + + ++ + + + + + + ++

Sbjct 768 RVLRSKIPYEMHALILCSTHS----FTDGLVL---LYEKMGMVEDVLRFWMD---KH 816

Query 315 NGANFNAADASSGGTGT-RNALRRQCYVRAIGNFPQSLLFL 354  
 N A+ A A Y + + L

Sbjct 817 NQASSPGASAKVVEHLMHYGNQHPHLYPLVLRFLTSTPELL 857

> [ref|XP\\_759967.1](#) hypothetical protein UM03820.1 [Ustilago maydis 521]  
[gb|EAK84746.1](#) hypothetical protein UM03820.1 [Ustilago maydis 521]  
 Length=1372

GENE ID: 3631904 UM03820.1 | hypothetical protein [Ustilago maydis 521]

Score = 55.1 bits (130), Expect = 2e-05, Method: Composition-based stats.  
Identities = 32/332 (9%), Positives = 82/332 (24%), Gaps = 49/332 (14%)

Query 93 RRRRDIWNIESNPVLAGLAANNPVNGSYIAIGNQV---FHLNPNLSNVSLNIASGSSGGA 149  
 RR G N S + I +V + ++ +

Sbjct 901 RRNSTALVEPYTVGEGSGKNATRPSSVTKITGEVDADASSGDAADASGVSGVNTSEQDKM 960

Query 150 GQTVPSNFSTFLPMIPDNYTQAFQKLVTFQTLPLDAMD-----SIVQTL S----- 195  
 + T+ + + L ++ TLS

Sbjct 961 DAYPVPSPRTYFAHFQHRQHFTRFLEVVALARWQVNMMDGELPADHTLSPVQAKNAPA 1020

Query 196 -----DAYSNTFKGLFTAAGLNGLE-----TLEHGRSVIEDGIQSIVDQGAQGFQ 242  
 + Y + + GL+ +E L +S+ ++ + + Q

Sbjct 1021 YSEKAGGEEYMDVERALRELGLDSNDEDAYENQELLDQKSIWNTLLELYLSSCSPSPGSQ 1080

Query 243 VIASFNDSSARVQCVGPDLSPTSIGRRVVGKGTDCVNRKWRQLSDIGGRIAGDILAADR 302  
 + P + V+ C + + + + +

Sbjct 1081 RQRALRLQ-----HSTLPYDMSHAVML---CSMENFDDGLIL---LYERMGMYYE 1126

Query 303 GASDFLGN-LTTCNGANFNAADASSGGTTRNALRRQCYVRAIGNFPQSLLFLPVSLTIE 361  
 + L + A+ +++ +L+ + Y + S P+ L+

Sbjct 1127 VVRLHMSALVEEEDASGSSSGKVAIALARYGSLQPELYDLVLRFLVSS----PILLSRH 1182

Query 362 GGKLYAALSSQLQTDVALCASEMGLEIGLVTAQ 393  
 L + L+ ++ + E+ +

Sbjct 1183 TSDLLSILNVIREKSLMSTLEIVQTLSTPHT 1214

> [ref|ZP\\_06695858.1](#) phage tail protein [Enterococcus faecium E1636]  
[gb|EFF22799.1](#) phage tail protein [Enterococcus faecium E1636]  
 Length=1110

Sort alignments for this subject sequence by:  
 E value [Score](#) [Percent identity](#)  
[Query start position](#) [Subject start position](#)

Score = 54.3 bits (128), Expect = 3e-05, Method: Composition-based stats.  
Identities = 20/212 (9%), Positives = 58/212 (27%), Gaps = 22/212 (10%)

Query 100 NIESNPVLAGLAANNPVNGSYIAIGNQVFHLNPNLSNVSLNIASGSSGGAGQTVPSNFST 159  
 I + NG + I + ++ N+S + I + V +

Sbjct 780 GIWTFHTIFDPVVAWNGIWT S I STASNIWNSISATASSIWN S I KNTITSLVQAA--- 836

Query 160 FLPMPIDNYTQAFQKLVTFQTLPLDAMD SIVQTLSDAYSNTFKGLFTAAGLNGLENETLE 219  
 + + + + + S+ + T++ N+N

Sbjct 837 -----ATVIQNIWSTVSSWLGGIWN S I ST A-----SNIW-----NSVTSSISNAINAAKS 882

Query 220 HGRSVIEDGIQSIVDQGAQGFEQVIASFNDSSARVQCVGPDLS-PSIGRRVVGKGTDC 278  
 +SV I + + + + + + + + + T

Sbjct 883 AIQSVWNS---ISSWISGIWNGIKNTALNLWNGITSTISSKVN DGKNAISSGWSNLTGI 938

Query 279 VNRKWRQLSDIGGRIAGDILAADR GASDFLGN 310  
 V+ + + I I D++ +

Sbjct 939 VSDIFNNVKSTIANIWEGIKKTVSAPIDWIRD 970



Score = 50.9 bits (119), Expect = 3e-04, Method: Composition-based stats.  
Identities = 26/280 (9%), Positives = 65/280 (23%), Gaps = 30/280 (10%)

```
Query 12  LIAAIGIIPWYVDAFLFTTPWN-----PQPPRTINQLPVTSATSATTPTQQSNVTLA 63
L+ A W + W+ + A ++++
Sbjct 747  LLGAAWQAVWTPISDFLKNKTWDTMTQWISIAWNGIVTTFHTIFDPVVAWNGIWTSAISTT 806

Query 64  LGNRINTDALTLDYGTNVNGLGINVNRNRNRNRDIWNIESNPVLAGLAANPNVNGSYIAI 123
N N+ +A N I + I++ N
Sbjct 807  ASNIWNSISATASSIWN----SIKNTITSLVQAAATVIQNIWSTVSSWLGGIWNSISSTA 862

Query 124  GNQVFLPNNLSNVSLNIASGSSGGAGQTVPSNFSFLEPMIPDNYTQAFQKLVTFQFTLP 183
N + +++SN +N A S + I + + + L
Sbjct 863  SNIWNSVTSSISNA-INAAK-----SAIQSVWNSISSWISGIWNGIKNTALNLW 910

Query 184  LDAMDSIVQTLSDAYSNTFKGLFTAAGLNGLNLEHGRSVIEDGIQSIVDQGAQGFQV 243
+I + N K ++ N + +V +
Sbjct 911  NGITSTI-----SSKVNDRKNAISSGWSNLTGIVSDIFNNVKSTIANIWEGIKKTVSAPI 965

Query 244  IASFNDSSARVQCCVGPDLSPSISGRVVVGKGTDCVNRKW 283
D + + + + + ++ + + +
Sbjct 966  -DWIRDKISGIFDNLNISIPHIPLPEFIMEGSPNPLKGGI 1004
```

> [ref|NP\\_690686.2|](#) **G** structural protein [Bacillus phage SPP1]  
[emb|CAL18687.1|](#) **G** unnamed protein product [Bacillus phage SPP1]  
Length=1032

[GENE ID: 955328\\_SPP1p035](#) | gene 18 [Bacillus phage SPP1]  
(10 or fewer PubMed links)

Score = 53.2 bits (125), Expect = 5e-05, Method: Composition-based stats.  
Identities = 15/219 (6%), Positives = 56/219 (25%), Gaps = 9/219 (4%)

```
Query 123  IGNOVFLPNNLSNVSLNIASGSSGGAGQTVPSNFSFLEPMIPDNYTQA--FQKLVTF 179
I + +S + + A + + + + +
Sbjct 674  IKEYTVKIWGAVSKWLSDAWNKIKQAASVWQALVTLIKKNFEMQKIVTIVWNTIKSVS 733

Query 180  QTLPLDAMDSIVQTLSDAYSNTFKGLFTAAGLNGLNLEHGRSVIEDGIQSIVDQGAQ 239
+ + S + + + + N K ++ L + ++ +
Sbjct 734  SKVWNG-IKSFLSSVWNGIVNAGKTVWNG-LKTFFTAFLNFQKKTWSTIWNNAVKTAVTKV 791

Query 240  FEQVIASFNDSSARVQCCVGPDLSPSISGRVVVGKGTDCVNRKWRQLSDIGGRIAGDIL 298
++ +++ ++ ++ L+ + V V W +L +
Sbjct 792  WKGIVSVGKTVWNGLKSFFTSWLNQKQLFSTVWNAVKTAVTNVWNLKLSAASSTFNAL- 850

Query 299  ADRGASDFLGNLTCNGANFNAAADASSGGTGRNALRR 337
++ + + + +N+ + G + R
Sbjct 851  --KSSVTINMKNVKKIKSIWNSVMSFFKGINLGSIGN 887
```

> [ref|ZP\\_00602924.1|](#) Phage tail tape measure protein TP901, core region [Enterococcus faecium DO]  
[ref|ZP\\_05671611.1|](#) phage tail tape measure protein TP901 [Enterococcus faecium 1,231,410]  
[ref|ZP\\_05832791.1|](#) phage tail tape measure protein TP901 [Enterococcus faecium C68]  
[ref|ZP\\_06676894.1|](#) phage-related tail protein [Enterococcus faecium E1162]  
[gb|EAN10680.1|](#) Phage tail tape measure protein TP901, core region [Enterococcus faecium DO]  
[gb|EEV54944.1|](#) phage tail tape measure protein TP901 [Enterococcus faecium 1,231,410]  
[gb|EEW61542.1|](#) phage tail tape measure protein TP901 [Enterococcus faecium C68]  
[gb|EFF34992.1|](#) phage-related tail protein [Enterococcus faecium E1162]  
Length=1143

Sort alignments for this subject sequence by:  
E value [Score](#) [Percent identity](#)  
[Query start position](#) [Subject start position](#)

Score = 52.0 bits (122), Expect = 1e-04, Method: Composition-based stats.  
Identities = 20/212 (9%), Positives = 56/212 (26%), Gaps = 22/212 (10%)

```
Query 100  NIESNPVLAGLAANPNVNGSYIAIGNQVFLPNNLSNVSLNIASGSSGGAGQTVPSNFS 159
I + NG + AI ++ N+S + I + V +
Sbjct 813  GIVTTFHTIFDPVVAWNGIWTAISTTASNIWNSISATASSIWNISIKNTITSLVQAA--- 869

Query 160  FLEPMIPDNYTQAFQKLVTFQTLPLDAMDSIVQTLSDAYSNTFKGLFTAAGLNGLNLE 219
+ + + + + + + T++ N +N
Sbjct 870  -----ATVIQNIWSTVSSWLGGIWNSISSTA-----SNIWNSVTSSISNAINAAKS 915

Query 220  HGRSVIEDGIQSIVDQGAQGFQVIAFNDSSARVQCCVGPDLSP-TSISGRVVVGKGTDC 278
+SV I + + + + + + + ++ + T
Sbjct 916  AIQSVWNS----ISSWISGIWNGIKNTALNLWNGITSTISSKVNDRKNAISSGWSNLTGI 971

Query 279  VNRKWRQLSDIGGRIAGDILAADRASDFLGN 310
V+ + + I I D++ +
Sbjct 972  VSDIFNNVKSTIANIWEGIKKTVSAPIDWIRD 1003
```

Score = 48.9 bits (114), Expect = 0.001, Method: Composition-based stats.  
Identities = 24/280 (8%), Positives = 61/280 (21%), Gaps = 30/280 (10%)

```
Query 12  LIAAIGIIPWYVDAFLFTTPWN-----PQPPRTINQLPVTSATSATTPTQQSNVTLA 63
L+ A W + W+ + A +++
Sbjct 780  LLGAAWQAVWTPISDFLKNKTWDTMTQWISIAWNGIVTTFHTIFDPVVAWNGIWTSAISTT 839

Query 64  LGNRINTDALTLDYGTNVNGLGINVNRNRNRNRDIWNIESNPVLAGLAANPNVNGSYIAI 123
N N+ +A N I + I++ N
Sbjct 840  ASNIWNSISATASSIWN----SIKNTITSLVQAAATVIQNIWSTVSSWLGGIWNSISSTA 895

Query 124  GNQVFLPNNLSNVSLNIASGSSGGAGQTVPSNFSFLEPMIPDNYTQAFQKLVTFQFTLP 183
N + +++SN +N A S + I + + + L
Sbjct 896  SNIWNSVTSSISNA-----INAAKSAIQSVWNSISSWISGIWNGIKNTALNLW 943

Query 184  LDAMDSIVQTLSDAYSNTFKGLFTAAGLNGLNLEHGRSVIEDGIQSIVDQGAQGFQV 243
+I + N K ++ N + +V +
Sbjct 944  NGITSTI-----SSKVNDRKNAISSGWSNLTGIVSDIFNNVKSTIANIWEGIKKTVSAPI 998

Query 244  IASFNDSSARVQCCVGPDLSPSISGRVVVGKGTDCVNRKW 283
D + + + + + ++ + + +
Sbjct 999  DW-IRDKISGIFDNLNISIPHIPLPEFIMEGSPNPLKGGI 1037
```

> [ref|ZP\\_05713621.1](#) tail protein [Enterococcus faecium DO]  
Length=574

Sort alignments for this subject sequence by:  
E value [Score](#) [Percent identity](#)  
[Query start position](#) [Subject start position](#)

Score = 51.6 bits (121), Expect = 2e-04, Method: Composition-based stats.  
Identities = 20/212 (9%), Positives = 56/212 (26%), Gaps = 22/212 (10%)

```
Query 100 NIESNPVLAGLAANNPNVNGSYIAIGNQVFHLPNNLSNVLSNLIASGSSGGAGQTVPSNFST 159
          I +      NG + AI  ++ N++S  + +I +      V +
Sbjct 244 GIVTTFHTIFDPVVAWNGIWTAISTTASNIIWNSISATASSIWNISIKNTITSLVQAA--- 300

Query 160 FLPMIPDNYTQAFQKLVTFQTLPLDAMDSIVQTLSDAYSNTFKGLFTAAGLNLNETLE 219
          + + + +      +      +      +      T++ N +N
Sbjct 301 -----ATVIQNIWSTVSSWLGGIWNISISSTA-----SNIWNSVTSSISNAINAAKS 346

Query 220 HGRSVIEDGIQSIQSDVQGAQGFQVIASFNDSARVQCVGPDLSPT-SIGRRRVVKGKGTDC 278
          +SV      I      + + + + + +      + + +      T
Sbjct 347 AIQSVWNS---ISSWISGIWNGIKNTALNLWNGITSTISSKVNKGKNAISSGWSNLTGI 402

Query 279 VNRKWRQLSDIGGRIAGDILAADRASDFLGN 310
          V+ + +      I      I      D++ +
Sbjct 403 VSDIFNNVKSTIANIWEGIKKTVSAPIDWIRD 434
```

Score = 48.6 bits (113), Expect = 0.001, Method: Composition-based stats.  
Identities = 24/280 (8%), Positives = 61/280 (21%), Gaps = 30/280 (10%)

```
Query 12  LIAAIGIIPWYVDAFLFTTPWN-----PQPPRTINQLPVTSATSATTPTQSSNVTLA 63
          L+ A      W +      W+      +      A      + + +
Sbjct 211 LLGAAWQAVWVTPIISDFLKNWDTMTQWISIAWNGIVTTFHTIFDPVVAWNGIWTAISTT 270

Query 64  LGNRINTDTALTDYGTNVNGLGINVNRNRNRDIWNIESNPVLAGLAANNPNVNGSYIAI 123
          N N+ +A      N      I      +      I++      N
Sbjct 271 ASNIWNSISATASSIWN----SIKNTITSLVQAAATVIQNIWSTVSSWLGGIWNISISSTA 326

Query 124 GNQVFHLPNNLSNVLSNLIASGSSGGAGQTVPSNFSTFLPMIPDNYTQAFQKLVTFQTL 183
          N + + + +SN      S +      I      + + + +      L
Sbjct 327 SNIWNSVTSSISNA-----INAAKSAIQSVWNSISSWISGIWNGIKNTALNLW 374

Query 184 LDAMDSIVQTLSDAYSNTFKGLFTAAGLNLNETLEHGRSVIEDGIQSIQSDVQGAQGFQV 243
          +I      + N K ++ N      + +V      +
Sbjct 375 NGITSTI----SSKVNKGKNAISSGWSNLTGIVSDIFNNVKSTIANIWEGIKKTVSAPI 429

Query 244 IASFNDSARVQCVGPDLSPTSIGRRRVVKGKGTDCVNRKW 283
          D + + + +      +      + + +      + + +
Sbjct 430 DW-IRDKISGIFDNLNISIPIHPLPEFIMEGSFNPLKQI 468
```

> [ref|ZP\\_05661457.1](#) phage tail tape measure protein TP901 [Enterococcus faecium 1,231,502]  
[gb|EEV44790.1](#) phage tail tape measure protein TP901 [Enterococcus faecium 1,231,502]  
Length=1139

Sort alignments for this subject sequence by:  
E value [Score](#) [Percent identity](#)  
[Query start position](#) [Subject start position](#)

Score = 51.2 bits (120), Expect = 2e-04, Method: Composition-based stats.  
Identities = 20/212 (9%), Positives = 56/212 (26%), Gaps = 22/212 (10%)

```
Query 100 NIESNPVLAGLAANNPNVNGSYIAIGNQVFHLPNNLSNVLSNLIASGSSGGAGQTVPSNFST 159
          I +      NG + AI  ++ N++S  + +I +      V +
Sbjct 813 GIVTTFHTIFDPVVAWNGIWTAISTTASNIIWNSISATASSIWNISIKNTITSLVQAA--- 869

Query 160 FLPMIPDNYTQAFQKLVTFQTLPLDAMDSIVQTLSDAYSNTFKGLFTAAGLNLNETLE 219
          + + + +      +      +      +      T++ N +N
Sbjct 870 -----ATVIQNIWSTVSSWLGGIWNISISSTA-----SNIWNSVTSSISNAINAAKS 915

Query 220 HGRSVIEDGIQSIQSDVQGAQGFQVIASFNDSARVQCVGPDLSPT-SIGRRRVVKGKGTDC 278
          +SV      I      + + + + + +      + + +      T
Sbjct 916 AIQSVWNS---ISSWISGIWNGIKNTALNLWNGITSTISSKVNKGKNAISSGWSNLTGI 971

Query 279 VNRKWRQLSDIGGRIAGDILAADRASDFLGN 310
          V+ + +      I      I      D++ +
Sbjct 972 VSDIFNNVKSTIANIWEGIKKTVSAPIDWIRD 1003
```

Score = 48.9 bits (114), Expect = 0.001, Method: Composition-based stats.  
Identities = 24/253 (9%), Positives = 64/253 (25%), Gaps = 26/253 (10%)

```
Query 12  LIAAIGIIPWYVDAFLFTTPWN-----PQPPRTINQLPVTSATSATTPTQSSNVTLA 63
          L+ A      W +      W+      +      A      + + +
Sbjct 780 LLGAAWQAVWVTPIISDFLKNWDTMTQWVSIWNGIVTTFHTIFDPVVAWNGIWTAISTT 839

Query 64  LGNRINTDTALTDYGTNVNGLGINVNRNRNRDIWNIESNPVLAGLAANNPNVNGSYIAI 123
          N N+ +A      N      I      +      I++      N
Sbjct 840 ASNIWNSISATASSIWN----SIKNTITSLVQAAATVIQNIWSTVSSWLGGIWNISISSTA 895

Query 124 GNQVFHLPNNLSNVLSNLIASGSSGGAGQTVPSNFSTFLPMIPDNYTQAFQKLVTFQTL 183
          N + + + +SN      S +      I      + + + +      L
Sbjct 896 SNIWNSVTSSISNA-----INAAKSAIQSVWNSISSWISGIWNGIKNTALNLW 943

Query 184 LDAMDSIVQTLSDAYS--NTFKGLFTAAGLNLNETLEHGRSVIEDGIQSIQSDVQGAQGFQ 241
          +I ++D ++ + T      + N      ++ E + + +      +
Sbjct 944 NGITSTISSKVNKGKNAISSGWSNLTGIVSDIFNNVKSTIANIWEGIKKTVSAPIDWIRD 1003

Query 242 QVIASFNDSARV 254
          ++ + F++ + +
Sbjct 1004 KISSIFDNLNISI 1016
```

> [ref|YP\\_176319.1](#) **G** tail length tape measure protein [Bacillus clausii KSM-K16]  
[dbj|BAD65358.1](#) **G** tail length tape measure protein [Bacillus clausii KSM-K16]  
Length=1631

[GENE ID: 3202947 ABC2824](#) | tail length tape measure protein  
[Bacillus clausii KSM-K16] (10 or fewer PubMed links)

Score = 50.5 bits (118), Expect = 4e-04, Method: Composition-based stats.  
Identities = 21/221 (9%), Positives = 55/221 (24%), Gaps = 46/221 (20%)

```
Query 158 STFLPMIPDNYTQAFQKLVTFQTLPL-----DAMDSIVQTLSDAYSNTFKGLFTA 208
          + + + F + + + + + V T + + N F ++
Sbjct 821 GGAWTALKTAWNNIWTFKTKTNFNAINWFLKSVWDGIKTVFNVVVTFIFNVKNGFNRVWNT 880

Query 209 -----AGLNLNETLEHGRSVIEDGIQSIQVVDQGAQGFQVIASF 247
          A ++ + + S +I + + + +
Sbjct 881 TKSIFLAVWNFLKNTWNNIWGAIREFVSRIVTNISSGFNTAKNTISRIFSAVWSFKIKIW 940

Query 248 NDSSARVQCVGPDLS-----TSIGRRVVVGKGTDCVNRKW-----RQLSDIGG 291
          + + + V ++ + + + V W ++ I
Sbjct 941 SSIWGSIRDFVARIVNAIKTRFTEISWNTIKSIWNRVWGFVKDIWGWKISIKDRVDRIFN 1000

Query 292 RIAGDILAADRGASDFLGNLTTCNGANFNAAADASSGGTGR 332
          I A S LG++ FN + G R
Sbjct 1001 GIRDGFNKAKDKVSTILGDMWQAVKDFNDIVDIARGLPKR 1041
```

> [ref|ZP\\_05924009.1](#) phage tail tape measure protein TP901 [Enterococcus faecium TC

6]  
[ref|ZP\\_06447221.1](#) phage tail tape measure protein TP901 [Enterococcus faecium D344SRF]  
[gb|EEW64142.1](#) phage tail tape measure protein TP901 [Enterococcus faecium TC  
6]  
[gb|EFD09276.1](#) phage tail tape measure protein TP901 [Enterococcus faecium D344SRF]  
Length=1238

Score = 48.6 bits (113), Expect = 0.001, Method: Composition-based stats.  
Identities = 22/228 (9%), Positives = 57/228 (25%), Gaps = 20/228 (8%)

```
Query 110 LAANNPNVNGSYIAIGNQVPHLPNNLSNVSLNIASGSSGGAGQTVPSNFTFLPMIPDNYT 169
          N N + + + N+S I G +V + + I +
Sbjct 889 TVLTNTWNTISQTAIAIWQPIQDFIINLSHAILEDGI - INIWNVSVTWTGTWNTIATAS 947

Query 170 QAFQKLV----TQFQTLPLDAMD--SIVQTLSDAYSNTFKGL-----FTAAGLNLNE 216
          + + + O+ + + + N K T++ N N
Sbjct 948 TIWNSIKLIVNVLVQSTKDKGIISVWTAITSWLTDKWNAIKNSANTWNSVTSSISNATNA 1007

Query 217 TLEHGRSVIEDGIQSIQVVDQGAQGFQVIASFNDSSARVQCVGPDLS--TSIGRRVVVGK 275
          +SV I + + + + + + + ++ +
Sbjct 1008 ANSVIQSVWNS---ISSWISGIWNGIKNTALNLWNGITSTISSKVNDGKNAISSGWSNL 1063

Query 276 TDCVNRKWRQLSDIGGRIAGDILAADRGASDF-LGNLTTCNGANFNAA 322
          T V+ + + I I D+ ++ +
Sbjct 1064 TGIVSDIFNNVKSTIANIWEGIKKTVSTPIDWIRDKISGIFDNLNLSL 1111
```

> [emb|CAC35527.1](#) gSG9 protein [Anopheles gambiae]  
Length=76

Score = 46.2 bits (107), Expect = 0.008, Method: Composition-based stats.  
Identities = 31/78 (39%), Positives = 43/78 (55%), Gaps = 10/78 (12%)

```
Query 4 SMSVVLALLIAAIGIIPWYVDAFLFTTPWNPQPPRTINQLPVTSAATSATPTQQSNVTLA 63
          S +V+ ++ P++ F + P+ QP A++A Q+SNVT+A
Sbjct 9 STLIVVVVIAIPRHQCSPPF---FQYNRPYLSQP-----SSQLASTAANVQRSNVTV 58

Query 64 LGNRINTDTALTDYGTNV 81
          LGNRINTDTAL DYGT V
Sbjct 59 LGNRINTDTALDDYGTNV 76
```

> [ref|ZP\\_04674169.1](#) conserved hypothetical protein [Lactobacillus paracasei subsp.  
paracasei 8700:2]  
[gb|EEQ64604.1](#) conserved hypothetical protein [Lactobacillus paracasei subsp.  
paracasei 8700:2]  
Length=1056

Score = 44.3 bits (102), Expect = 0.031, Method: Composition-based stats.  
Identities = 31/281 (11%), Positives = 71/281 (25%), Gaps = 19/281 (6%)

```
Query 16 IGIIPWYVDAFLFTTPWNPQPPRTINQLPVTSAATSATPTQQSNVTLALGNRINTDTALT 75
          + I W W+ + T+A+ N
Sbjct 661 LIIKNWGAIVTWLKGWVSTVTSFFSGMWTS-----IKQIFITAINAITNFLKPAF 710

Query 76 DYGTVNVLGGINVNRNRRRRRRDIWNIESNPVLAGLAANNPNVNGSYIAIGNQVPHLPNNLS 135
          NV I + I+ +A A + + N +
Sbjct 711 TAAVNV- IKSIWNGIKSFFSAFWNGIKVIFTVAITAVIIGTYLNIWKTITITAMNFIK 769

Query 136 NVSLNIASGSSGGAGQTVPS---NFSTFLPMIPDNYTQAFQKLVTFQTLPLDAMDIVQ 192
          + N+ +G G + S + I + F K+ + ++ + +
Sbjct 770 GIITNVWNGIKSFGPILASIGNVIRSAWNSISSVTSSVFNKVKSVISSIWNNIKVVSN 829

Query 193 TLDAYS--NTPKGLFTAAGLNLNETLEHGRSVIEDGIQSIQVVDQGAQGFQVIASFND 250
          ++ S + ++ N N +V +I + V +++N
Sbjct 830 VVNAVKSVVSNWNAVSVSTSNIFNSVKSVAVSNVWNSIKSTISNVVGSIRNAVSSAWNAV 889

Query 251 SARVQCVGPDLSPTSIGRRVVVGKGTDCVNRKWRQLSDIGG 291
          S+ V + + + D V +
Sbjct 890 SSVTSN-VWNSI--KNAISGPINTAKDIVRGAIDAIRGFFN 927
```

> [gb|EDL20001.1](#)  Unc-51 like kinase 1 (C. elegans), isoform CRA\_a [Mus musculus]  
Length=1159

[GENE ID: 22241 Utk1](#) | Unc-51 like kinase 1 (C. elegans) [Mus musculus]  
(Over 10 PubMed links)

Score = 43.9 bits (101), Expect = 0.031, Method: Composition-based stats.  
Identities = 24/155 (15%), Positives = 45/155 (29%), Gaps = 11/155 (7%)

```
Query 15 AIGIIPWYVDAFLFTTPWNPQPPRTINQLPVTSAATSATPTQQSNVTLALGNRINTDTAL 74
          A +P + + P+ + S ++ + S T LG R+++ L
Sbjct 609 ATFLFPLVGTIPERPSWS-RVPSQADVRVGRSPRPGSSVPEHSPTTGLGCRHLSAPNL 667

Query 75 TDYGTNVNVLGGINVNRNRRRRRRDIWNIESNPVLAGLAANNPNVNGSYIAIG-NQVPHLPNN 133
          +D +V R + + + + +A P G LP+
Sbjct 668 SD-----FHVVRPKLPKPPDPLGATFSPPTSAPOQCPGLQSCRPLRGSPLKLPDF 718

Query 134 LSNVSLNIASGSSGGAGQTVPSNFTFLPMIPDNY 168
```

Sbjct 719 L L GS AG + + +  
LQRSPLPPIILGSPTKAGPSDFPKTPSSQNLLTLL 753

> [gb|AAH59835.1](#)  Ulk1 protein [Mus musculus]  
Length=1057

[GENE ID: 22241 Ulk1](#) | Unc-51 like kinase 1 (C. elegans) [Mus musculus]  
(Over 10 PubMed links)

Score = 43.9 bits (101), Expect = 0.034, Method: Composition-based stats.  
Identities = 24/155 (15%), Positives = 45/155 (29%), Gaps = 11/155 (7%)

Query 15 AIGIIPWYVDAFLFTTPWNPQPRTINQLPVTSA SATTPTQQSNVTALG NRINTDTAL 74  
A +P + + P+ + S ++ + S T LG R+++ L  
Sbjct 507 ATFLFLPVGTIPERPSWS-RVPS PQGADVRVGRSPRPGSSVPEHSPRTTGLGCR LHSAPNL 565  
Query 75 TDYGTNVNGLGINVNR RRRRRDIWNIESNPVLAGLA ANNPVNGSYIAIG-NQVFHLPNN 133  
+D +V R + + + + +A P G LP+  
Sbjct 566 SD-----FHVVRPKLPKPPTDPLGATFSP PQTSAPQPCPGLQSCRPLRGSPKLPDF 616  
Query 134 LSNVSLNIASGSSGGAGQTVPSNFSTFLPMIPDNY 168  
L L GS AG + + +  
Sbjct 617 LQRSPLPPIILGSPTKAGPSDFPKTPSSQNLLTLL 651

> [dbj|BAE28476.1](#)  unnamed protein product [Mus musculus]  
Length=1057

[GENE ID: 22241 Ulk1](#) | Unc-51 like kinase 1 (C. elegans) [Mus musculus]  
(Over 10 PubMed links)

Score = 43.9 bits (101), Expect = 0.036, Method: Composition-based stats.  
Identities = 24/155 (15%), Positives = 45/155 (29%), Gaps = 11/155 (7%)

Query 15 AIGIIPWYVDAFLFTTPWNPQPRTINQLPVTSA SATTPTQQSNVTALG NRINTDTAL 74  
A +P + + P+ + S ++ + S T LG R+++ L  
Sbjct 507 ATFLFLPVGTIPERPSWS-RVPS PQGADVRVGRSPRPGSSVPEHSPRTTGLGCR LHSAPNL 565  
Query 75 TDYGTNVNGLGINVNR RRRRRDIWNIESNPVLAGLA ANNPVNGSYIAIG-NQVFHLPNN 133  
+D +V R + + + + +A P G LP+  
Sbjct 566 SD-----FHVVRPKLPKPPTDPLGATFSP PQTSAPQPCPGLQSCRPLRGSPKLPDF 616  
Query 134 LSNVSLNIASGSSGGAGQTVPSNFSTFLPMIPDNY 168  
L L GS AG + + +  
Sbjct 617 LQRSPLPPIILGSPTKAGPSDFPKTPSSQNLLTLL 651

> [ref|ZP\\_04248588.1](#) Prophage LambdaBa01, membrane protein [Bacillus cereus Rock1-3]  
[gb|LEL19689.1](#) Prophage LambdaBa01, membrane protein [Bacillus cereus Rock1-3]  
Length=1216

Score = 43.9 bits (101), Expect = 0.037, Method: Composition-based stats.  
Identities = 32/392 (8%), Positives = 93/392 (23%), Gaps = 55/392 (14%)

Query 21 WYVDAFLFTTPWNPQPRTINQLPVTSA SATTPTQQSNVTALG NRINTDTALTDYGTN 80  
W W+ + + S +T + +++ L N T N  
Sbjct 644 WNSIKEFLIGIWD---GISQWATQWESISESTASVWNSIKEFLV LVELWNGITESLSETWN 700  
Query 81 VNGLGINVNR RRRRRDIWNIESNPVLAGLA---ANNPVNGSYIAIGNQVFHLPNNLSNV 137  
+ + + + + AI N L  
Sbjct 701 SIVETTETWNSIVEYLTGIWDGVVETLSEVWNGISQTTSEVWTAISEFFISTWNGLVAF 760  
Query 138 SLNIASGSSGGAGQTVPSNFSTFLPMIPDNYTQAFQKLVTFQTLPLDAM--DSIVQTL 195  
I G + + I + + Q + + + + +  
Sbjct 761 LTPILQGIADFFSM-----IWNIGISTVIQTVWNFTIQYLQAVTALYFATPIFESI 812  
Query 196 DAYSNTFKGLFTAAGLNLNLEHGRSVIEDGI-----QSIVDQGAQGFQEVIA S-- 246  
++ + + A N + ++ + +++ + ++ + ++  
Sbjct 813 KSFIVSVWDAISLAVTIVWNAIVAFQACWNGIVSIATAVFETLRNWI VNVWDVVISSTM 872  
Query 247 --FNDS SARVQCC---VGPDLSPSISGR-----RVVKGKTDVCVNRKWRQ 285  
+N +Q C V + V ++ W  
Sbjct 873 TVWNTVKNFQACWNLVAIVTPIFDAIKNWI VNAWNTISSTSAVWNTIKGFLSSLWNS 932  
Query 286 LSDIGGRIAGDILAADR GASDFLGNLTCNGANFNAADASSGGTGRNALRRQCYVRAIG 345  
+ + + + I A + + + + + +N ++ ++  
Sbjct 933 IVSTASSVFNIKEAISTVWNM---ISSTSSSIWNGIKSTLSNIWEGIKST---ASSVW 985  
Query 346 NFPQSLFLPVSLTIEGKLYAALSSSLQTDVA 377  
N + + PV + A +++ V  
Sbjct 986 NGLKDAIMTPVRWV--TSAVSGAFEGMKSAVL 1015

> [gb|EFB27064.1](#) hypothetical protein PANDA\_003089 [Ailuropoda melanoleuca]  
Length=4306

Score = 43.5 bits (100), Expect = 0.043, Method: Composition-based stats.  
Identities = 33/271 (12%), Positives = 85/271 (31%), Gaps = 33/271 (12%)

Query 17 GIIPWYVDAFLFTTPWNPQPRTINQ-----LPVTSA SATTPTQQS 58  
+ F T P+ I + S + + S  
Sbjct 1450 LPTTYSYKPFSTRPQSWTTAPITVPGPAKSGFTSLSSSSSNTPSASPLKSIWSVSTPS 1509  
Query 59 NVTALG NRINTD-TALTDYGTNVNG-LGINVNR RRRRRDIWNIESNPV L---AGLAA 112  
+ LG + +++D + + I+ + + +NI+ + +  
Sbjct 1510 PIKSTLGASTTSSVKSISDVASPIRSFRTISSPIKTVVSQSPYNIQVSSGTLGRAPTVE 1569  
Query 113 NNP-----VNGSYIAIGNQVFHLPNNLSNVSLN-IASGSSGGAGQTVPS--NFSTFLPMI 164  
+P N + + + V + L S+ S S F + + +  
Sbjct 1570 ASPLKGLASNTFSFRTSPVTTAGSLLERSSITMTPPASPKNINMYSSSLPFKSIITSA 1629  
Query 165 PDNYTQAFQKLVTFQTLPLDAMD SIVQTLSDAYSNTFKGLFTAAGLNLNLEHGRSV 224  
+ + +V+ ++ +D + S T++ + S+ K + A + +N++ +  
Sbjct 1630 APLISSPLKSVSPAKS-AVDVISSAKVTMASSLPVKQMPGHAEVALVNGSISPLKYP 1688  
Query 225 IEDGIQSIVDQGAQGFQEVIA SFNDSSARVQ 255  
+ + A E++ + N S+ V  
Sbjct 1689 SSSTLINGCKATATLQEKISTATNSVSSVNN 1719

> [ref|ZP\\_04223830.1](#) Prophage LambdaBa01, membrane protein [Bacillus cereus Rock3-42]  
[gb|EFL44486.1](#) Prophage LambdaBa01, membrane protein [Bacillus cereus Rock3-42]  
Length=1211

Score = 43.5 bits (100), Expect = 0.051, Method: Composition-based stats.  
Identities = 22/219 (10%), Positives = 61/219 (27%), Gaps = 25/219 (11%)

```
Query 161 LPMIPDNYTQAFQKLVTFQTLPLDAMDSI--VQTLSDAYSNTFKGLFTAAGLNLNETL 218
            I + ++ + + + + + + + + + T + +N N
Sbjct 814 WNTISSTTSFVWETIKNFLVSCWNGLVAVLPIFEQIKSWIITVWNTISTTTVNWVNAIK 873

Query 219 EHGRSVIEDGIQSIVDQGAQGFEQVIASFNDSSARVQQCVGPDLSPTSIGRRVVGKGTDC 278
            +S + +V + +I ++N S+ + + V T+
Sbjct 874 NFLQSCWNGIVAFVVPVIFNSIKGWIINTWNTISSTT-----SAVWNAVNTNY 919

Query 279 VNRKWRQLSDIGGRIAGDILAADRGASDFLGNLTTTCNGANFNAAADASSGGTGTRNALRRQ 338
            ++ W + I I +I A + + + + +N ++
Sbjct 920 LSSLWNSIVSIRAFINNIKEAISTVWNM---ISSASVSWNGIKSTLASIWEGIKYTAA 976

Query 339 CYVRAIGNFPQSLFLFVSLTIEGGKLYAALSSLQTDVA 377
            + N + PV + A +Q+ +
Sbjct 977 SIWSGLTN---AIMTPVKWVTRA--VIGAFQGMQSAIL 1009
```

> [gb|AAA64834.1](#) **G** ankyrin G [Homo sapiens]  
Length=4377

[GENE\\_ID: 288 ANK3](#) | ankyrin 3, node of Ranvier (ankyrin G) [Homo sapiens]  
(Over 10 PubMed links)

Score = 43.5 bits (100), Expect = 0.051, Method: Composition-based stats.  
Identities = 31/270 (11%), Positives = 78/270 (28%), Gaps = 33/270 (12%)

```
Query 17 GIIPWYVDAFLFTTPWNPQPPRTINQ-----LPVTSATSATTPTTQQS 58
            + F T P+ I + S + + S
Sbjct 1488 LPTTYSYKPPFSTRPYQSWTTAPITVPGPAKSGFTSLSSSSSNTPSASPLKSIWSVSTPS 1547

Query 59 NVTLAGLRINTD- TALTLDYGTNVNGLGINVNRNRNRNRDIWNIESNPVLAGLAANNPV- 116
            + LG + + +D + + L + + + A
Sbjct 1548 PIKSTLGASTTSVKSISDVASPIRSLRMTSSPIKTVVSQSPYNIQVSSGTLARAPAVTE 1607

Query 117 -----NGSYAIGNQVFHLPNNLSNVSLN- IASGSSGGAGQTVPS--NFSTFLPMI 164
            N + + + + V + L S+ S S F + +
Sbjct 1608 ATPLKGLASNSTFSSRTSPVTTAGSLRLERSITMTPASPKNINMYSSSLPFKSIITSA 1667

Query 165 PDNYTQAFQKLVTFQTLPLDAMDSIVQTLSDAYSNTFKGLFTAAGLNLNETLEHGRSV 224
            + + +V+ ++ +D + S T++ + S+ K + A + +N ++ +
Sbjct 1668 APLISSPLKSVSPVKSR-VDVISSAKITMASSLPVKMPGHEVALVNGSISPLKYA 1726

Query 225 IEDGIQSIVDQGAQGFEQVIASFNDSSARV 254
            + + A E++ ++ N S+ V
Sbjct 1727 SSSTLINGCKATATLQEKISSATNSVSSV 1756
```

> [ref|ZP\\_05354696.1](#) TP901 family phage tail tape measure protein [Clostridium difficile  
QCD-76w55]  
[ref|ZP\\_05386812.1](#) TP901 family phage tail tape measure protein [Clostridium difficile  
QCD-97b34]  
Length=1129

Score = 43.2 bits (99), Expect = 0.059, Method: Composition-based stats.  
Identities = 37/338 (10%), Positives = 90/338 (26%), Gaps = 20/338 (5%)

```
Query 71 DTALTDYGTNVNGLGINVNRNRNRNRDIWNIESNPVLAGLAANNPVNGSYAIGNQVFHL 130
            T T + V+ + +N ++N+ + + +NG V +
Sbjct 579 STLATAFAKAVDVTITNVLNGLASILNGVFNL--IIGIVTGDSKMMNGVKQIFDGGVKII 636

Query 131 PNNLSNVSLNIASGSSGGAGQTVPSNFSTFLPMIPDNYTQAFQKLVTFQTLPLDAMDSI 190
            + + + + + + S F + + D + + L + + + +
Sbjct 637 KS-IWKGFDVFTAPIQAIADIADSLFKDKAKWLTDKWKLDRTFLENPIEATAKISTKTN 695

Query 191 VQTLSDAYSNTFKGLFTAAGLNLNETLEHGRSVIEDGIQSIVDQGAQGFEQVIASFNDS 250
            V ++ GL +T+ + + D I + + V +
Sbjct 696 VNI PGSKAADAAGKS--TPNTGGLKQTIANLKGFSDFKFIKPMTDSISQGVESGKTKF 753

Query 251 SARVQQCVGPDLSPTS-----GRRVVGKGTDCVNRKWRQLSDI-GGRIAGDILAADR 302
            + + + + + + + + + + + K+ +L +I G I + +
Sbjct 754 TELQNKILNDVKPALKVLED SGVNFKDKFKESITSIKDKFNELKNLAGNKTNIDNLVK 813

Query 303 GASDF--LGNLTTTCNGANFNAAADASSGGTGTRNALRRQCYVRAIGNFPQSLFLFVSLT 359
            L NL C A + + + + +S + +S
Sbjct 814 AFEPLKPHLDNLKCEFDKVKKAITDFFTPAKVQVGTVNK-VSQPMDSVKKSTDGKLSFQ 872

Query 360 IEGGKLYA--ALSSLQTDVALCASEMGLI GLVTAQV 394
            L ++ ++ IG+ A V
Sbjct 873 SLTQALAPVKAWFQGFMPFLLSQIQQLLPSIGIAIAGV 910
```

> [ref|YP\\_002749202.1](#) **G** TMP repeat-containing protein [Bacillus cereus 03BB102]  
[gb|ACQ30669.1](#) **G** TMP repeat-containing protein [Bacillus cereus 03BB102]  
Length=1211

[GENE\\_ID: 7688922 BCA\\_1927](#) | TMP repeat-containing protein  
[Bacillus cereus 03BB102]

Score = 43.2 bits (99), Expect = 0.062, Method: Composition-based stats.  
Identities = 22/219 (10%), Positives = 62/219 (28%), Gaps = 25/219 (11%)

```
Query 161 LPMIPDNYTQAFQKLVTFQTLPLDAMDSI--VQTLSDAYSNTFKGLFTAAGLNLNETL 218
            I + ++ + + + + + + + + + T + +N N
Sbjct 814 WNTISSTTSFVWETIKNFLVSCWNGLVAVLPIFEQIKSWIITVWNTISTTTVNWVNAIK 873

Query 219 EHGRSVIEDGIQSIVDQGAQGFEQVIASFNDSSARVQQCVGPDLSPTSIGRRVVGKGTDC 278
            +S + +V + +I ++N S+ + + V T+
Sbjct 874 NFLQSCWNGIVAFVVPVIFNSIKGWIINTWNTISSTT-----SAVWNAVNTNY 919

Query 279 VNRKWRQLSDIGGRIAGDILAADRGASDFLGNLTTTCNGANFNAAADASSGGTGTRNALRRQ 338
            ++ W + I I +I A + + + + +N ++
Sbjct 920 LSSLWNSIVSIRAFINNIKEAISTVWNM---ISSASVSWNGIKSTLASIWEGIKYTAA 976

Query 339 CYVRAIGNFPQSLFLFVSLTIEGGKLYAALSSLQTDVA 377
```

+ N      + PV+      + A  +Q+ +  
Sbjct 977  SIWSGLTN---AIMTPVNWVTRA--VIGAFQGMQSAIL 1009

> [ref|ZP\\_04106162.1](#) Uncharacterized phage protein [Bacillus thuringiensis serovar berliner ATCC 10792]  
[ref|ZP\\_04137112.1](#) Uncharacterized phage protein [Bacillus thuringiensis serovar thuringiensis str. T01001]  
[ref|ZP\\_04142613.1](#) Uncharacterized phage protein [Bacillus thuringiensis Bt407]  
[gb|EEM25676.1](#) Uncharacterized phage protein [Bacillus thuringiensis Bt407]  
[gb|EEM31178.1](#) Uncharacterized phage protein [Bacillus thuringiensis serovar thuringiensis str. T01001]  
[gb|EEM62141.1](#) Uncharacterized phage protein [Bacillus thuringiensis serovar berliner ATCC 10792]  
Length=1251

Score = 41.6 bits (95), Expect = 0.20, Method: Composition-based stats.  
Identities = 31/231 (13%), Positives = 64/231 (27%), Gaps = 23/231 (9%)

Query 34  PQPPRTINQLPVTSSATSATPTQQSNVTLALGNRINTDALTLDYGTN----VNGLGINV 88  
          T          + T          + L + N      + T N      ++ + +  
Sbjct 893  AWNWTNIIREAWQWITDVTNNEFLGPIKLLIQEGWNYVLNITSKAWNAVSTFISDVWNEI 952  
Query 89  NRRRRRRDIWNIESNPVLAGL--AANNPVNGSYIAIGNQVPHLPNLSNVSLNIASGSS 146  
          R + +          +N N      I      + +N+SN +N  
Sbjct 953  VGYIRNKINKATDVTVSGWTSTKNTTSNKWNEITSTISRVMWNTITSNISNA-VNEVKSRI 1011  
Query 147  GGAGQTVPSNFSFLPMPIDNYTQAFQKLVTFQ---TLPLDAMDSIVQTLSDAYSNTFK 203  
          GA  V + S      + N T A + L +      + + S      +SD + +K  
Sbjct 1012  EGAWNVVYAITSGIWNVSNVTGAWDRLSGSGVSGTFNYISNIVRSNWSVSDILQSVYK 1071  
Query 204  GLFTAAGLNLNETLEHGRSVIEDGI---QSIVDQGAQGFQVIAFNDSS 251  
                  +N +      + I      I+D + + +      N +  
Sbjct 1072  -----PINSVVGFFYDLWNSIIRVMNGIIDTVTRAWNKAGGILNKLN 1113

> [ref|ZP\\_04251409.1](#) Prophage LambdaBa01, membrane protein [Bacillus cereus 95/8201]  
[gb|EEL16945.1](#) Prophage LambdaBa01, membrane protein [Bacillus cereus 95/8201]  
Length=1210

Score = 41.2 bits (94), Expect = 0.21, Method: Composition-based stats.  
Identities = 26/242 (10%), Positives = 65/242 (26%), Gaps = 25/242 (10%)

Query 161  LPMIPDNYTQAFQKLVTFQTLPLDAMDSIVQT--LSDAYSNTFKGLFTAAGLNLNETL 218  
          I      + ++ +      + +V      ++      + +N N  
Sbjct 814  WNTISSTTSFVWETIKNFLVSCWNGLVAFVVPVPEQIKSWIIAVWNTISSTTTVNVWNAIK 873  
Query 219  EHGRSVIEDGIQSIVDQGAQGFQVIAFNDSSARVQQCVGPDLSPTSIGRRVVGKGTDC 278  
          +S      + +V      +I ++N S+          V      T+  
Sbjct 874  NFLQSCWNGIVAFVVPVIFNSIKGWIINTWNTISSTTST-----VWNTVTNY 919  
Query 279  VNRKWRQLSDIGGRIAGDILAADRGSDFLGNLTTCCNGANFNAAADASSGGTGRNALRRQ 338  
          ++ W + +      + I +I A      + + + +      + AS      A  
Sbjct 920  LSSLWNSIVSMARAIFFNNKEAISTVWNMISASVSVMWNGIKSTLASIWDGIRYATA--- 976  
Query 339  CYVRAIGNFPQSLFLPVLSTIEGGKLYAALSSLOTDVALCASEMGLEIGLVTAQVSSKI 398  
          +I +      + PV+      + A +Q+ +      S + I      + I  
Sbjct 977  ---SIWSGLTDAIMTPVNWVTRA--VIGAFQGMQSAILAVWSGIKSGIKAAINGLIYMI 1030  
Query 399  AF 400  
Sbjct 1031  NK 1032

> [dbj|BAE32939.1](#) **G** unnamed protein product [Mus musculus]  
Length=1051

[GENE ID: 22241 Ulk1](#) | Unc-51 like kinase 1 (C. elegans) [Mus musculus]  
(Over 10 PubMed links)

Score = 41.2 bits (94), Expect = 0.23, Method: Composition-based stats.  
Identities = 22/148 (14%), Positives = 42/148 (28%), Gaps = 11/148 (7%)

Query 22  YVDAFLFTTPWNPQPPRTINQLPVTSSATSATPTQQSNVTLALGNRINTDALTLDYGTN 81  
          +      P+ +      S      ++ + S T LG R+++ L+D  
Sbjct 508  GTIPERPSWS-RVPSQGADVRVGRSPRPGSSVPEHSPRTTGLGCRlhsAPNLSD----- 561  
Query 82  NGLGINVNRNRNRNRDIWNIESNPVLAGLAANNPVNGSYIAIG-NQVPHLPNLSNVSLN 140  
          +V R + +      + +      +A P G      LP+ L L  
Sbjct 562  ----FHVVRPKLPKPPDPLGATFSPPPQTSAPQPCPLQSCRPLRGSPLKLPDFLQRSPLP 617  
Query 141  IASGSSGGAGQTVPSNFSFLPMPIDNY 168  
          GS  AG +      +      +  
Sbjct 618  PILGSPTKAGPSFDFPKTPSSQNLTL 645

> [sp|O70405.1|ULK1\\_MOUSE](#) **G** RecName: Full=Serine/threonine-protein kinase ULK1; AltName: Full=Unc-51-like kinase 1; AltName: Full=Serine/threonine-protein kinase Unc51.1

[gb|AAF23317.1|AF072370.1](#) **G** UNC51.1 serine/threonine kinase [Mus musculus]

[gb|AAC40118.1](#) **G** UNC-51-like kinase ULK1 [Mus musculus]  
Length=1051

[GENE ID: 22241 Ulk1](#) | Unc-51 like kinase 1 (C. elegans) [Mus musculus]  
(Over 10 PubMed links)

Score = 41.2 bits (94), Expect = 0.23, Method: Composition-based stats.  
Identities = 22/148 (14%), Positives = 42/148 (28%), Gaps = 11/148 (7%)

Query 22  YVDAFLFTTPWNPQPPRTINQLPVTSSATSATPTQQSNVTLALGNRINTDALTLDYGTN 81  
          +      P+ +      S      ++ + S T LG R+++ L+D  
Sbjct 508  GTIPERPSWS-RVPSQGADVRVGRSPRPGSSVPEHSPRTTGLGCRlhsAPNLSD----- 561  
Query 82  NGLGINVNRNRNRNRDIWNIESNPVLAGLAANNPVNGSYIAIG-NQVPHLPNLSNVSLN 140  
          +V R + +      + +      +A P G      LP+ L L  
Sbjct 562  ----FHVVRPKLPKPPDPLGATFSPPPQTSAPQPCPLQSCRPLRGSPLKLPDFLQRSPLP 617  
Query 141  IASGSSGGAGQTVPSNFSFLPMPIDNY 168  
          GS  AG +      +      +  
Sbjct 618  PILGSPTKAGPSFDFPKTPSSQNLTL 645



> [ref|NP\\_033495.2|](#) **UG** serine/threonine-protein kinase ULK1 [Mus musculus]  
[gb|AAH57121.1|](#) **G** Unc-51 like kinase 1 (C. elegans) [Mus musculus]  
[gb|EDL20002.1|](#) **G** Unc-51 like kinase 1 (C. elegans), isoform CRA\_b [Mus musculus]  
Length=1051

**GENE ID: 22241** [Ulk1](#) | Unc-51 like kinase 1 (C. elegans) [Mus musculus]  
(Over 10 PubMed links)

Score = 41.2 bits (94), Expect = 0.24, Method: Composition-based stats.  
Identities = 22/148 (14%), Positives = 42/148 (28%), Gaps = 11/148 (7%)

```
Query 22 YVDAFLFTTPWNPQPPRTINQLPVTSAATPTQSQSNVTLALGNRINTDALTIDYGTNV 81
      + P+ + S ++ + S T LG R+++ L+D
Sbjct 508 GTIPERPSWS-RVPSQGADVVRVGRSPRPGSSVPEHSPRTTGLGCRHLSAPNLSD----- 561

Query 82 NGLGINVNRNRNRNRDIWNIESNPVLAGLAANNPVNGSYIAIG-NQVFHLPNNLSNVSLN 140
      +V R + + + +A P G LP+ L L
Sbjct 562 ---FHVVRPKLPPTDPLGATFSPPTSAPOPCPLGQSCRPLRGSPKLPDFLQRSPLP 617

Query 141 IASGSSGGAGQTVPSNFTFLPMIPDNY 168
      GS AG + + +
Sbjct 618 PILGSPTKAGPSFDFPKTPSSQNLLTLL 645
```

> [gb|AAC78143.1|](#) **G** 270 kDa ankyrin G isoform [Rattus norvegicus]  
Length=2622

**GENE ID: 361833** [Ank3](#) | ankyrin 3, epithelial [Rattus norvegicus]  
(Over 10 PubMed links)

Score = 40.8 bits (93), Expect = 0.27, Method: Composition-based stats.  
Identities = 30/271 (11%), Positives = 79/271 (29%), Gaps = 31/271 (11%)

```
Query 14 AAIGIIPWYVDALFTTPWNPQPPR-----TINQLPVTSAATPTTQQ 57
      A + F T P+ N + S + +
Sbjct 1486 ARSLPTTYSHKPFSTRPYQSWTTTPTITVPGPAKSGSLSSSPSNTPSASPLKSIWSVSTP 1545

Query 58 SNVTALGNRINTD-TALTDYGTNVNG-LGINVNRNRNRNRDIWNIESNPV----AGLA 111
      S + LG + +++D + + I+ R +N + +
Sbjct 1546 SPIKSTLGASTTSSVKISDVASPIRSFRTISSPIRTVASPSPYNTQVASGLTGRVPTIT 1605

Query 112 ANNPV----NGSYIAIGNQVFHLPNNLSNVSLN-IASGSSGG--AGQTVPSNFTFLPM 163
      P+ N + + + V + L S+ S + F + +
Sbjct 1606 EATPIKGVAPNSTLSSRTSPVTTAGSLEKSSITMTPPASPKANITMYSSSLPFKSIITS 1665

Query 164 IPDNYTQAFQKLVTFQTLPLDAMDIVQTLSDAYSNTFKGLFTAAGLNGLNETHGRS 223
      + + +V+ ++ D + + ++ S+ K + A + +N ++ +
Sbjct 1666 AAPLSSPLKSVSPKSAADVIATAKAAASTLSSPLKQMSGHAEVALVNGSVSPKLY 1724

Query 224 VIEDGIQSIQVQGAQGFQVIASFNDSARV 254
      + + A +++ + N S+ V
Sbjct 1725 PSSSALINGCKATATLQDKISTATNAVSSV 1755
```

> [ref|NP\\_001029156.1|](#) **UG** ankyrin 3, epithelial isoform 2 [Rattus norvegicus]  
Length=2622

**GENE ID: 361833** [Ank3](#) | ankyrin 3, epithelial [Rattus norvegicus]  
(Over 10 PubMed links)

Score = 40.8 bits (93), Expect = 0.27, Method: Composition-based stats.  
Identities = 30/271 (11%), Positives = 79/271 (29%), Gaps = 31/271 (11%)

```
Query 14 AAIGIIPWYVDALFTTPWNPQPPR-----TINQLPVTSAATPTTQQ 57
      A + F T P+ N + S + +
Sbjct 1486 ARSLPTTYSHKPFSTRPYQSWTTTPTITVPGPAKSGSLSSSPSNTPSASPLKSIWSVSTP 1545

Query 58 SNVTALGNRINTD-TALTDYGTNVNG-LGINVNRNRNRNRDIWNIESNPV----AGLA 111
      S + LG + +++D + + I+ R +N + +
Sbjct 1546 SPIKSTLGASTTSSVKISDVASPIRSFRTISSPIRTVASPSPYNTQVASGLTGRVPTIT 1605

Query 112 ANNPV----NGSYIAIGNQVFHLPNNLSNVSLN-IASGSSGG--AGQTVPSNFTFLPM 163
      P+ N + + + V + L S+ S + F + +
Sbjct 1606 EATPIKGVAPNSTLSSRTSPVTTAGSLEKSSITMTPPASPKANITMYSSSLPFKSIITS 1665

Query 164 IPDNYTQAFQKLVTFQTLPLDAMDIVQTLSDAYSNTFKGLFTAAGLNGLNETHGRS 223
      + + +V+ ++ D + + ++ S+ K + A + +N ++ +
Sbjct 1666 AAPLSSPLKSVSPKSAADVIATAKAAASTLSSPLKQMSGHAEVALVNGSVSPKLY 1724

Query 224 VIEDGIQSIQVQGAQGFQVIASFNDSARV 254
      + + A +++ + N S+ V
Sbjct 1725 PSSSALINGCKATATLQDKISTATNAVSSV 1755
```

> [ref|XP\\_002619294.1|](#) **G** hypothetical protein CLUG\_00453 [Clavisporea lusitaniae ATCC 42720]  
[gb|EEQ36330.1|](#) **G** hypothetical protein CLUG\_00453 [Clavisporea lusitaniae ATCC 42720]  
Length=1855

**GENE ID: 8499645** [CLUG\\_00453](#) | hypothetical protein  
[Clavisporea lusitaniae ATCC 42720]

Score = 40.8 bits (93), Expect = 0.28, Method: Composition-based stats.  
Identities = 22/221 (9%), Positives = 58/221 (26%), Gaps = 12/221 (5%)

```
Query 32 WNPQPPRTINQLPVTSAATPTTQSQSNVTLALGNRINTDALTIDYGTNVNGLGINVNR 91
      + + + N + S + + N +++ + L + L +
Sbjct 756 LDIRYNKIITNDVGLSLPNLEVLVYASKNNIAGFSDKMESSLRLHFDNRNIPITNLEFQITLP 815

Query 92 RRRRDIWNIESNPVLAGLAANNPVNGSYIAIGNQVFHLPNNLSNVN-----LNIA 143
      R D+ + + + P + N + LP+ LS + N
Sbjct 816 RLTVDLDSKAKITALPGEFISKMPHIEKLVLDKNHVLTPDELSALPRLTHLSLYANNLQ 875

Query 144 GSSGGAGQTVPSNFTFLPMIPDNY-TQAFQKLVTFQTLPLDAMD--SIVQTLSDAYS 200
      GQ V + + + + + + + + +
Sbjct 876 HLPDSIGQLVSLQYLDLHNSNIETLPSIWNKLSLSTLVNNSMLSSFPSPSLELASKMS 935

Query 201 TFKGLFTAAGLNGLNETHGRSVIEDGIQSIQVQGAQGF 241
```

Sbjct 936 + K +AG + N+ + + S++  
SPKTGNDSAGKSNQNVMAS-SAQFNSLADSLLSLTADNR 975

> [ref|XP\\_002807495.1|](#) PREDICTED: LOW QUALITY PROTEIN: ankyrin-3-like [Callithrix jacchus]  
Length=4392

Score = 40.8 bits (93), Expect = 0.30, Method: Composition-based stats.  
Identities = 31/271 (11%), Positives = 76/271 (28%), Gaps = 33/271 (12%)

Query 17 GIIPWYVDAFLFTTPWNPQPRTINQ-----LPVTSATSATTPTQQS 58  
+ F T P+ I + S + S  
Sbjct 1488 LPTTYSYKPFSTRPYQSWTTAPITVPGPAKSGFTSLSSSSSNTPSASPLKSIWSVSTPS 1547  
Query 59 NVTLAGNRRINTD-TALTDYGTNVNGLGINVNRRRRRRDIWNIESNPVLAGLAANNPV- 116  
+ LG + +++D + + + + A  
Sbjct 1548 PKKSTLGASTTSSVKISIDVASPIRSFRMTSSPIKTVVSQSPYNIQVSSGTLARAPAVTE 1607  
Query 117 -----NGSYIAIGNQVFHLPNNLSNVSLN-IASGSSGGAGQTVPS--NFSTFLPMI 164  
N + + + V + L S+ S F + +  
Sbjct 1608 ATPLKGLASNTSFSRSTSPVTTAGSLERSIITMTPPASPKSNINMYSSSLPFKSIITSA 1667  
Query 165 PDNYTQAFQKLVTFQTLPLDAMDSDIVQTLSDAYSNTFKGLFTAAGLNGLETLEHGRSV 224  
+ + +V+ + + +DA+ S T+ + + S+ K + A + +N + + +  
Sbjct 1668 APLMSSPLKSVSPVKS-AVDAISSAKVTMASSSPVKQMPGHAEVALVNGSISPLKYP 1726  
Query 225 IEDGIQSIDVQGAQGFQEVIAFNDSSARVQ 255  
+ + A E + + N S+ V  
Sbjct 1727 SSSTLINGCKATATLQETISTATNSVSSSVN 1757

> [ref|NP\\_001101811.1|](#) **UG** serine/threonine-protein kinase ULK1 [Rattus norvegicus]  
[gb|EDM14029.1|](#) **G** unc-51-like kinase 1 (mapped) [Rattus norvegicus]  
Length=1051

GENE ID: 360827 Ulk1 | Unc-51 like kinase 1 (C. elegans) [Rattus norvegicus]  
(10 or fewer PubMed links)

Score = 40.8 bits (93), Expect = 0.31, Method: Composition-based stats.  
Identities = 25/191 (13%), Positives = 49/191 (25%), Gaps = 14/191 (7%)

Query 22 YVDAFLFTTPWNPQPRTINQLPVTSAATPTQQSNVTLAGNRRINTDALTLDYGTNV 81  
+ P + + S ++ + S T LG R+++ L+D  
Sbjct 508 GTIPERPSPWS-RVPSPPQADVRAGRSPRPGSSVPEHSPRTGLGCRLLHSAPNLSD----- 561  
Query 82 NGLGINVNRRRRRRDIWNIESNPVLAGLAANNPVNGSYIAIG-NQVFHLPNNLSNVSLN 140  
+V R + + + + + +A P G LP+ L L  
Sbjct 562 ---FHVVPRKLPKPPDPLGATFSPPPQTSAPQPCPLQSCRPLRGSPLKLPDFLQSRPLP 617  
Query 141 IASGSSGGAGQTVPSNFSTFLPMIPDNY-TQAFQKLVTFQTLPLDAMDSDIVQTLSDAYS 199  
GS AG + + + Q + L +  
Sbjct 618 PILGSPTKAGPSDFPKAPSSQSLLLTLARQGVVMTPP--RNRTLPLDSEAGPFQGGQLG 675  
Query 200 NTFKGLFTAAG 210  
+ + G  
Sbjct 676 SGLRPAEDTRG 686

> [ref|ZP\\_05332071.1|](#) phage protein [Clostridium difficile QCD-63q42]  
[ref|ZP\\_05399216.1|](#) phage protein [Clostridium difficile QCD-37x79]  
Length=1130

Score = 40.8 bits (93), Expect = 0.34, Method: Composition-based stats.  
Identities = 30/270 (11%), Positives = 70/270 (25%), Gaps = 17/270 (6%)

Query 139 LNIASGSSGGAGQTVPSNFSTFLPMIPDNYTQAFQKLVTFQTLPLDAMDSDIVQTLSDAY 198  
++ + S F + D + L + + + V  
Sbjct 645 IDFVTAPIQAIADIADSLFKDKAKWLTDKWRDLRTFLENPIEATAKISAKTNVNI PGSKA 704  
Query 199 SNTFKGLFTAAGLNGLETLEHGRSVIEDGIQSIDVQGAQGFQEVIAFNDSSARVQQCV 258  
++ GL +T+ + + D I + + V + + + +  
Sbjct 705 ADAAGK--TPNTGGLKQTVANLKGFSDFKTFIKPMTDISISQGVESGKSKFTELQNKIL 762  
Query 259 GPDLSPTSI-----GRRVVGKGTDCVNRKWRQLSDI-GGRIAGDILAADRGSADF--- 307  
+ + + + K+ +L DI G I +I +  
Sbjct 763 NDVKPALKVLEDGSGVFNKPKFESTITSIKDKFNELKIDILAGNIKTNIDNLVKAPEPLKPH 822  
Query 308 LGNLTTCNGANFNAADASSGGTGRNLRQCYVRAIGNFPQSLLFLPVSLTIEGGKLYA 367  
L NL C A + + + +S + +S L  
Sbjct 823 LDNLKCECFDKVKKAITDFFTPAKQVGDVTK-VSQPMDSVKSTDGIKLSFQSLTQALAP 881  
Query 368 ---ALSSLQTDVALCASEMGLEIGLVTAQV 394  
++ ++ IG+ A V  
Sbjct 882 VKAWFQGFMPFLSQIGQQLLPSIGIAIAGV 911

> [ref|ZP\\_04146935.1|](#) Prophage LambdaBa01, membrane protein [Bacillus thuringiensis serovar tochiensis BGSC 4Y1]  
[gb|EEM21327.1|](#) Prophage LambdaBa01, membrane protein [Bacillus thuringiensis serovar tochiensis BGSC 4Y1]  
Length=725

Score = 40.5 bits (92), Expect = 0.35, Method: Composition-based stats.  
Identities = 40/393 (10%), Positives = 95/393 (24%), Gaps = 55/393 (13%)

Query 20 PWYVDAFLFTTPWNPQPRTINQLPVTSAATPTQQSNVTLAGNRRINTDALTLDYGT 79  
W W+ ++ S +T + +++ L N L  
Sbjct 152 TWNAIGEFLVGIWDV---IVQWASDTWNSISESTSSIWNSIKELYLIELWNGIKDLLTETW 208  
Query 80 N--VNLGINVNRRRRRRDIWN-IESNPVLAGLAANNPVNGSYIAIGNQVFHLPNNLSN 136  
N V N +WN + +A + + + AI + L  
Sbjct 209 NTMVENTTEIWNISIVEYLTGVWNGVVEVETLSVAWDSIKQTTSEVWTAISEFFISTWGLVA 268  
Query 137 VSLNIASGSSGGAGQTVPSNFSTFLPMIPDNYTQAFQKLVTFQTLPLDAM--DSIVQTL 194  
+ G + I + + Q + + + +  
Sbjct 269 FITPVLQGIADFFSM-----IWNIGISTVIQTVWNFITQYLQAIWTAIYFATPIFES 320  
Query 195 SDAYSNTFKGLFTAAGLNGLETLEHGRSVIEDGI-----QSIVDQGAQGFQEVIAF- 246  
Y ++ S + + I + + + +  
Sbjct 321 IKNYITECWNTISSSTSFVWETIKNFLVSCWNGLVAFVVPVIFEQIKSWIIAVWNTISTTT 380

Query 247 ---FNDSSARVQOC---VGPDLSPSTIGR-----RVVGKGTDCVNRKWR 284  
+N + +Q C V + + + V T+ ++ W  
Sbjct 381 VNVVNAIRSFLLQSCWNLVAFVVPVIFNAIKDWIVNNWKTISSITSAVWTAVTNYLSSLWN 440

Query 285 QLSDIGGRIAGDILAADRGASDFLGNLTTCCNGANFNAADASSGGTGRNALRRQCYVRAI 344  
+ + I +I A + + + + + AS A +I  
Sbjct 441 SIVSMARAIFNNIKEAISTVWNMISSASVSVWNGIKSTLASIWDGIRYTAA-----SI 493

Query 345 GNFPQSLFLFVSLTIEGGKLYAALSSLQTDVA 377  
+ + PV+ + A +Q+ +  
Sbjct 494 WSLGTLDAIMTPVNWVTRA--VIGAFQGMQSAIL 524

> [gb|EDL97288.1](#) |  ankyrin 3, epithelial, isoform CRA\_i [Rattus norvegicus]  
[gb|EDL97293.1](#) |  ankyrin 3, epithelial, isoform CRA\_i [Rattus norvegicus]  
Length=2616

GENE ID: 361833 Ank3 | ankyrin 3, epithelial [Rattus norvegicus]  
(Over 10 PubMed links)

Score = 40.5 bits (92), Expect = 0.36, Method: Composition-based stats.  
Identities = 32/264 (12%), Positives = 83/264 (31%), Gaps = 23/264 (8%)

Query 14 AAIGIIPWYVDALFLLTPWNPQPRTINQ-----LPVTSATSATTPTQOSNVTLALG 65  
A + F T P+ + L + + + +S + + +  
Sbjct 1486 ARSLPTTYSHKPPFFSTRPYQSWTTPLTVPGPAKSGSLSSSPNTSPASPLKSIWSVSTP 1545

Query 66 NRINTD--TALTDYGTNVNGLGINVNRNRNRNRDIWNIESNPVLAGLAANNPVN-GSYIA 122  
+ I + + T + + + + + R I + S A+ + I  
Sbjct 1546 SPIKSTLGASTTSSVKSISDVASPIRSFRITSSPIRTVASPSYNTQVASGTLGRVPTIT 1605

Query 123 IGNQVPHLPNN--LSNVSLNIASGSSGGAGQTVPSNFSFLPMPIDNY--TQAFQKLVTD 178  
+ L N LS+ + + + S ++ Y + F+ ++T  
Sbjct 1606 EATPIKGLAPNSTLSSRTSPVTTAGSLLERSSITMTPPASPKANITMYSSSLPFKSIITS 1665

Query 179 FQTLPLDAMDIVQ-----TSDAYSNTFKGLFTAAGLNLNETLEHGRSVIEDGIQ 230  
L + S+V ++ S+ K + A + +N ++ + +  
Sbjct 1666 AAPLISSPLKSVVSPTKSAAKAMASTLSSPLKQMSGHAEVALVNGSVSPLKYPSSALI 1725

Query 231 SIVDQGAQGFQVIAFNDSSARV 254  
+ A +++ + N S+ V  
Sbjct 1726 NGCKATATLQDKISTATNAVSSV 1749

> [dbj|BAC65639.1](#) |  mKIAA0722 protein [Mus musculus]  
Length=1004

GENE ID: 22241 Utk1 | Unc-51 like kinase 1 (C. elegans) [Mus musculus]  
(Over 10 PubMed links)

Score = 40.5 bits (92), Expect = 0.39, Method: Composition-based stats.  
Identities = 22/148 (14%), Positives = 42/148 (28%), Gaps = 11/148 (7%)

Query 22 YVDAFLFTTPWNPQPRTINQLPVTSATSATTPTQOSNVTLALGNRINTDALTLDYGTNV 81  
+ + P+ + S ++ + S T LG R+++ L+D  
Sbjct 461 GTIPERPSWS-RVPSQGADVRVGRSPRPGSSVPEHSPTTGLGCRRLHSAPNLSD----- 514

Query 82 NGLGINVNRNRNRNRDIWNIESNPVLAGLAANNPVNGSYIAIG-NQVPHLPNNLSNVSLN 140  
+V R + + + + + +A P G LP+ L L  
Sbjct 515 ----FHVVRPKLPKPPDPLGATFSPPTQTSAPQPCPQLQSCRPLRGSPLKLPDFLQRSPLP 570

Query 141 IASGSSGGAGQTVPSNFSFLPMPIDNY 168  
GS AG + + + +  
Sbjct 571 PILGSPTKAGPSFDFPKTPSSQNLLTLL 598

> [emb|CAH73232.1](#) |  ankyrin 3, node of Ranvier (ankyrin G) [Homo sapiens]  
[emb|CAI40518.1](#) |  ankyrin 3, node of Ranvier (ankyrin G) [Homo sapiens]  
[emb|CAI41373.1](#) |  ankyrin 3, node of Ranvier (ankyrin G) [Homo sapiens]  
Length=4372

GENE ID: 288 ANK3 | ankyrin 3, node of Ranvier (ankyrin G) [Homo sapiens]  
(Over 10 PubMed links)

Score = 40.5 bits (92), Expect = 0.44, Method: Composition-based stats.  
Identities = 30/270 (11%), Positives = 77/270 (28%), Gaps = 33/270 (12%)

Query 17 GIIPWYVDALFLLTPWNPQPRTINQ-----LPVTSATSATTPTQOS 58  
+ F T P+ I + S + + S  
Sbjct 1483 LPTTYSYKPPFFSTRPYQSWTTAPITVPGPAKSGFTSLSSSSNTSPASPLKSIWSVSTPS 1542

Query 59 NVTLAGNRINTD-TALTDYGTNVNGLGINVNRNRNRNRDIWNIESNPVLAGLAANNPV- 116  
+ LG + +++D + + + + A  
Sbjct 1543 PIKSTLGASTTSSVKSISDVASPIRSFRITMSSPIKTVVVSQSPYNIQVSSGTLARAPAVTE 1602

Query 117 -----NGSYIAIGNQVPHLPNNLSNVSLN-IASGSSGGAGQTVPS--NFSTFLPMI 164  
N + + + + V + L S+ S S F + +  
Sbjct 1603 ATPLKGLASNTFSRTSPVTTAGSLLERSSITMTPPASPKSNINMYSSSLPFKSIITS 1662

Query 165 PDNYTQAFQKLVTDQFQTLPLDAMDIVQTLSDAYSNTFKGLFTAAGLNLNETLEHGRSV 224  
+ + +V+ ++ +D + S T++ + S+ K + A + +N ++ +  
Sbjct 1663 AAPLISSPLKSVVSPVKS-AVDVISSAKITMASSLSPPVKQMPGHAEVALVNGSISPLKYP 1721

Query 225 IEDGIQSVVDQGAQGFQVIAFNDSSARV 254  
+ + A E++ + N S+ V  
Sbjct 1722 SSSTLINGCKATATLQEKISSATNSVSSV 1751

> [gb|EAW54200.1](#) |  ankyrin 3, node of Ranvier (ankyrin G), isoform CRA\_b [Homo sapiens]  
Length=4232

GENE ID: 288 ANK3 | ankyrin 3, node of Ranvier (ankyrin G) [Homo sapiens]  
(Over 10 PubMed links)

Score = 40.5 bits (92), Expect = 0.44, Method: Composition-based stats.  
Identities = 30/270 (11%), Positives = 77/270 (28%), Gaps = 33/270 (12%)

Query 17 GIIPWYVDALFLLTPWNPQPRTINQ-----LPVTSATSATTPTQOS 58

Sbjct 1343 + F T P+ I + S + + S 1402  
Query 59 NVTLAGNLRINTD-TALTDYGTNVNGLGINVNRNRDRDIWNIESNPVLAGLAANNPV- 116  
+ LG + +++D + + + + A  
Sbjct 1403 PKKSTLGASTTSSVKISIDVASPIRSFRTMSSPIKTVVVSQSPYNIQVSSGTLARAPAVTE 1462  
Query 117 -----NGSYIAIGNQVFLPNNLSNVSLN-IASGSSGGAGQTVPS--NFSTFLPMI 164  
N + + + + V + L S+ S S F + +  
Sbjct 1463 ATPLKGLASNSTFSSRTSPVTTAGSLLEERSITMTTPASPKNINMYSSSLPFKSIITSA 1522  
Query 165 PDNYTQAFQKLVTFQTLPLDAMDSDIVQTLSDAYSNTFKGLFTAAGLNLNETLEHGRSV 224  
+ + +V+ ++ +D + S T++ + S+ K + A + +N ++ +  
Sbjct 1523 APLISSPLKSVVSPVKS-AVDVISSAKITMASSLSPPVKQMPGHAEVALVNGSISPLKYP 1581  
Query 225 IEDGIQSIVDQGAQGFQEQVIASFNDSSARV 254  
+ + A E++ ++ N S+ V  
Sbjct 1582 SSSTLINGCKATATLQEKISSATNSVSSV 1611

> [ref|NP\\_066267.2|](#) **UG** ankyrin-3 isoform 1 [Homo sapiens]  
[sp|O12955.3|ANK3\\_HUMAN](#) **G** RecName: Full=Ankyrin-3; Short=ANK-3; AltName: Full=Ankyrin-G  
[gb|EAW54201.1|](#) **G** ankyrin 3, node of Ranvier (ankyrin G), isoform CRA\_c [Homo sapiens]  
Length=4377

[GENE ID: 288 ANK3](#) | ankyrin 3, node of Ranvier (ankyrin G) [Homo sapiens]  
(Over 10 PubMed links)

Score = 40.1 bits (91), Expect = 0.46, Method: Composition-based stats.  
Identities = 30/270 (11%), Positives = 77/270 (28%), Gaps = 33/270 (12%)

Query 17 GIIPWYVDAFLFTTPWNPQPRTINQ-----LPVTSATSATPTQQS 58  
+ F T P+ I + S + + S  
Sbjct 1488 LPTTYSYKPFSTRPYQSWTTAPITVPGPAKSGFTSLSSSSSNTPSASPLKSIWSVSTPS 1547  
Query 59 NVTLAGNLRINTD-TALTDYGTNVNGLGINVNRNRDRDIWNIESNPVLAGLAANNPV- 116  
+ LG + +++D + + + + A  
Sbjct 1548 PKKSTLGASTTSSVKISIDVASPIRSFRTMSSPIKTVVVSQSPYNIQVSSGTLARAPAVTE 1607  
Query 117 -----NGSYIAIGNQVFLPNNLSNVSLN-IASGSSGGAGQTVPS--NFSTFLPMI 164  
N + + + + V + L S+ S S F + +  
Sbjct 1608 ATPLKGLASNSTFSSRTSPVTTAGSLLEERSITMTTPASPKNINMYSSSLPFKSIITSA 1667  
Query 165 PDNYTQAFQKLVTFQTLPLDAMDSDIVQTLSDAYSNTFKGLFTAAGLNLNETLEHGRSV 224  
+ + +V+ ++ +D + S T++ + S+ K + A + +N ++ +  
Sbjct 1668 APLISSPLKSVVSPVKS-AVDVISSAKITMASSLSPPVKQMPGHAEVALVNGSISPLKYP 1726  
Query 225 IEDGIQSIVDQGAQGFQEQVIASFNDSSARV 254  
+ + A E++ ++ N S+ V  
Sbjct 1727 SSSTLINGCKATATLQEKISSATNSVSSV 1756

> [dbj|BAE33746.1|](#) **G** unnamed protein product [Mus musculus]  
Length=1051

[GENE ID: 22241 Utk1](#) | Unc-51 like kinase 1 (C. elegans) [Mus musculus]  
(Over 10 PubMed links)

Score = 40.1 bits (91), Expect = 0.46, Method: Composition-based stats.  
Identities = 21/148 (14%), Positives = 41/148 (27%), Gaps = 11/148 (7%)

Query 22 YVDAFLFTTPWNPQPRTINQLPVTSATSATPTQQSNVLALGNRINTDTALTDYGTNV 81  
+ + + + S + + + S T LG R+++ L+D  
Sbjct 508 GTIPERPSWS-RVPSQQGADVRVGRSPRPGSSVPEHSPRTTGLGCRLLHSAPNLS- 561  
Query 82 NGLGINVNRNRDRDIWNIESNPVLAGLAANNPVNGSYIAIG-NQVFLPNNLSNVSLN 140  
+V R + + + + +A P G LP+ L L  
Sbjct 562 ---FHVVRKPKPPTDPLGATFSPQTSAPQPCPLGQSCRPLRGSPLKLPDFLQRSPLP 617  
Query 141 IASGSSGGAGQTVPSNFTFLPMIPDNY 168  
GS AG + + +  
Sbjct 618 PILGSPTKAGPSFDFPKTPSSQNLLTLL 645

> [ref|XP\\_002612001.1|](#) **G** hypothetical protein BRAFLDRAFT\_124780 [Branchiostoma floridae]  
[gb|EEN68010.1|](#) **G** hypothetical protein BRAFLDRAFT\_124780 [Branchiostoma floridae]  
Length=1722

[GENE ID: 7245707 BRAFLDRAFT\\_124780](#) | hypothetical protein  
[Branchiostoma floridae] (10 or fewer PubMed links)

Score = 40.1 bits (91), Expect = 0.46, Method: Composition-based stats.  
Identities = 26/161 (16%), Positives = 48/161 (29%), Gaps = 9/161 (5%)

Query 5 MSVVLALLIAAIGIIPWYVDAFLFTTPWNPQPRTINQLPVT-----SATSATPTQ 56  
+ V+A+L+ A+ T N P +T+ +  
Sbjct 829 RTAVVAVLLCALFGQQSSSTTPSPTPATNTTSPSVTESTTNNNATPSVTESTNSNNAT 888  
Query 57 QSNVTLAGNLRINTDTALTDYGTNVNGLGINVNRNRDRDIWNIESNPVLAGLAANNPV 116  
S VT + N N ++T+ TN N +V+ + S V  
Sbjct 889 PS-VTESTTNSNNATPSVTESTTNNNATPSVSGSSTTNNNPTPSVSGSTTNNNPTSP 947  
Query 117 NGSYIAIGNQVFLPNNLSNVSLNIASGSSGGAGQTVPSNF 157  
+GS N + + + S S +P+  
Sbjct 948 SGSTTNNNPTPSVSGSTTNNNPTPSVSGSTTNNNPTPP 988

> [ref|XP\\_001929357.1|](#) **UG** PREDICTED: ankyrin 3, node of Ranvier (ankyrin G) [Sus scrofa]  
Length=4346

[GENE ID: 100154687 ANK3](#) | ankyrin 3 [Sus scrofa] (10 or fewer PubMed links)

Score = 40.1 bits (91), Expect = 0.50, Method: Composition-based stats.  
Identities = 30/270 (11%), Positives = 85/270 (31%), Gaps = 31/270 (11%)

Query 17 GIIPWYVDAFLFTTPWNPQPRTINQ-----LPVTSATSATPTQQSNVTLAGLN 66  
+ F T P+ I L +S+ + + +S +++ +  
Sbjct 1458 LPTTYSYKPFSTRPYQSWTTAPITVPGPAKSGFTSLSSSSSNTPSASPLKSIWSVSTPS 1517

Query 67 RINT---DTALTDYGTNVNGLGINVNRRRRRRDIWNIESNPVLAGLAANNPVGNSYIAI 123  
I + + + + + R + + + + V + +  
Sbjct 1518 PIKSTLGASTTSSVKSISDVASPIRSFRTISSPIKTVVQSPYNIQVSSGTLVRAPTUTE 1577

Query 124 GNQVFHLPNN--LNSVSLNIASGSSGGAGQTVPSNFSFLPMIPDNY--TQAFQKLVTF 179  
+ + L + N S + + + S + + + Y + F + + T  
Sbjct 1578 ASPLKGLASNTSPRTSPVTTAGSLLERSITMTPPASPKNINMYSSSLPFKSIITSA 1637

Query 180 QTLPLDAMDSDIVQ-----TLSDAYSNTFKGLFTAAGLNGLNLEHGRSVI 225  
L + S + V T + + + S + K + A + + N + + +  
Sbjct 1638 APLISSPLKSVSSAKPTVDVVSAAKVTMASSLSPPVKQMPGPAEVVLVNGSISPLKYPS 1697

Query 226 EDGIQSIVDQGAQGFQVIAFNDSSARVQ 255  
+ + + A E + + + N S + +  
Sbjct 1698 SSTLMNGCKATATFQEKISTATNSVSSVLN 1727

> [ref|YP\\_001987063.1](#) **G** Tail tape measure protein [Lactobacillus casei BL23]  
[emb|CA066205.1](#) **G** Tail tape measure protein [Lactobacillus casei BL23]  
Length=1056

[GENE ID: 6404742 tmp](#) | Tail tape measure protein [Lactobacillus casei BL23]  
Score = 40.1 bits (91), Expect = 0.50, Method: Composition-based stats.  
Identities = 27/281 (9%), Positives = 71/281 (25%), Gaps = 19/281 (6%)

Query 16 IGIIPVYVDAFLFTTPWNPQPPRTINQLPVTSATSATPTQQSNVTLALGNRINTDALT 75  
+ I W + + W + T + + + + T L + +  
Sbjct 661 LVKKNWGAIVTWLKGVWS---TVTSFFKQLWNGIKQIFITIAINAITNFKLPAFTAANVI 717

Query 76 DYGTNVNGLGINVNRRRRRRDIWNIESNPVLAGLAANNPVGNSYIAIGNQVFHLPNNLS 135  
N + + + I + + A A + + + N + +  
Sbjct 718 KSIWN-----GIKSFFSALWNGIKVIFTVAITAIAVIIGTYLNIWKTIIITVMNLIK 769

Query 136 NVSLNIASGSSGGAGQTVPS--NFSTFLPMIPDNYTQAFQKLVTFQTLPLDAMDSDIVQ 192  
+ + + G G + S + I + F + + + + + + +  
Sbjct 770 GIITKVVWNGIKSFFGPIILSSIGNVIRSAWNAISSVTSSVFNRVKSVVSSIWNKIVVSN 829

Query 193 TLDAYS--NTFKGLFTAAGLNGLNLEHGRSVIEDGIQSIVDQGAQGFQVIAFND 250  
+ + S + + + N N + + V + I + + V + + N  
Sbjct 830 VVNAVKSVVSNWNAWVSSSTSNIFNSVKSVAVSNVWNSIKSTISNVVGSIRNAVSSAWNAV 889

Query 251 SARVQQCVGPDLSPTSIGRRVVGKGTDCVNRKWRQLSDIGG 291  
S + V + + + D V + +  
Sbjct 890 SSVTSN-VWDSI--KNAISGPINTAKDIVRGAIDAIRGFFN 927

> [ref|ZP\\_04019473.1](#) conserved hypothetical protein [Finegoldia magna ATCC 53516]  
[gb|EEI67754.1](#) conserved hypothetical protein [Finegoldia magna ATCC 53516]  
Length=498

Score = 40.1 bits (91), Expect = 0.51, Method: Composition-based stats.  
Identities = 33/356 (9%), Positives = 86/356 (24%), Gaps = 28/356 (7%)

Query 21 WYVDAFLFTTPWNP-----QPPRTINQLPVTSATSATPTQQSNVTLALGNRINTDT 72  
W + + + W + + + + + + N + +  
Sbjct 117 WNGLSEGWNSIWTITFTLTSWNTFIEGAKSLWQSLGEFFTSWGTGQITFTTNIWALS 176

Query 73 ALTDYGTNVNGLGINVNRRRRRRDIWNIESNPVLAGLAANNPVGNSYIAIGNQVFHLPN 132  
+ T G I + + A NG + + + +  
Sbjct 177 TITTEVFTAVGEFIRTTW---EGIKTLISTVLDAIKVKAETIWNNGIKTFLTTVITAIGT 232

Query 133 NLSNVSLNIASGSSGGAGQTVPSNFSFLPMIPDNYTQAFQKLVTFQTLPLDAMDSDIVQ 192  
+ S N T + S I + + + T + + + S + +  
Sbjct 233 FIS-TSWNNIKVVIQTVLNTIKSIVMNVWNAIKSFISGVLNGLMILVSNVW-NSIKSTIS 290

Query 193 TLDAYSNTFKGLFTAAGLNGLNLEHGRSVIED---GIQSIVDQGAQGFQVIAFND 249  
+ + + + F + + S + + I + + Q + N  
Sbjct 291 STVNSAKSAVTSAPNSMKSIAISSMSNILYIRNGFNNAVNFIRNLASQAYTWGADMING 350

Query 250 SSARVQQCVGPDLSPTSIGRRVVGKGTDCVNRKWRQLSDIGGRIAGDILAADRASDFLG 309  
+ + + G + + V R G + + DF + +  
Sbjct 351 IARGISNAIGNVI-----SAVSNVASTIRSYLHFSVPDVGPLTDYESWMPDFME 399

Query 310 NLTTCCNGANFNAAADASSGGTGRNALRRQCYVRAIGNFPQSLFLPVSILTIEGKGL 365  
L + + + S + L + + G + + + + + +  
Sbjct 400 GLSKGIEKSRRLVQSSMKNVASDMVLNPNISAVGMGGYDKESAVNGIDIGRQISDA 455

> [gb|EFA12920.1](#) hypothetical protein TcasGA2\_TC006990 [Tribolium castaneum]  
Length=233

Score = 40.1 bits (91), Expect = 0.53, Method: Composition-based stats.  
Identities = 19/150 (12%), Positives = 40/150 (26%), Gaps = 20/150 (13%)

Query 253 RVQQCVGPDLSPTSIGRRV-VGKGTDCVNRKWRQLSDIGGRIAGDILAADRASDFLGNL 311  
V C + R + + C + N K + + + + + + + +  
Sbjct 93 DVSSCTKQKQDVINKFRELFFENRVQVCINGKIQEAAASLLKGSKYNDVMTMSVHRLDHDV 152

Query 312 TTCNGANFNAAADASSGGTGRNALRRQCYVRAIGNFPQSLFLPVSILTIEGKGLYAALSS 371  
C + C + + LP + E L  
Sbjct 153 NVCDSI-----LCISPILTINLATISLPQIQIKTEVNNARDLLQD 193

Query 372 LQTDVALCASEMGLEIGLVTAQVSSKIAFC 401  
L + VA C + + IA C  
Sbjct 194 LKVMVAECRDNNVADFTSFVTSLVAI IANC 223

> [ref|NP\\_203744.1](#) **UG** MICAL-like protein 1 [Homo sapiens]  
[sp|O8N3F8.2|MILK1\\_HUMAN](#) **G** RecName: Full=MICAL-like protein 1; AltName: Full=Molecule interacting with Rab13; Short=MIRab13  
[emb|CAD42713.1](#) **G** molecule interacting with Rab13 [Homo sapiens]  
[11 more sequence titles](#)  
Length=863

[GENE ID: 85377 MICALL1](#) | MICAL-like 1 [Homo sapiens] (Over 10 PubMed links)

Score = 40.1 bits (91), Expect = 0.55, Method: Composition-based stats.

Identities = 22/167 (13%), Positives = 39/167 (23%), Gaps = 16/167 (9%)  
Query 13 IAAIGIIPWYVDAFLFTTPWNPQPRTINQLPVTATSATTPTQQSNVTLAL-GNRINTD 71  
++ P +P T P P S LAL +R++  
Sbjct 441 APSLATSPALGHPESTPKSLHPWYGITPTSSP--KTKRRPAPRAPASPLALHASRLSHS 498  
Query 72 TALTDYGTNVNGLGINVNR---RRRDIWNIESNPVLAGLAANNFVNG 118  
+ + + + + P G + N  
Sbjct 499 EPPSATPSPALSVESLSSESASQTAGAELEPPAVPKSSSEPAVHAPGTPGNPVSLSTNS 558  
Query 119 SYIAIGNQVFHLPNNLSNVSLNIASGSSGGAGQTVPSNFTFLPMIP 165  
S + G V + S +A + G +G S P  
Sbjct 559 SLASSGELVEPRVEQMPQASPLAPRTRGSSGPPAKPCSGATPTPL 605

> [ref|XP\\_515124.2|](#) **UG** PREDICTED: molecule interacting with Rab13 [Pan troglodytes]  
Length=889

[GENE ID: 458822 MICALL1](#) | MICAL-like 1 [Pan troglodytes]

Score = 39.7 bits (90), Expect = 0.66, Method: Composition-based stats.  
Identities = 22/167 (13%), Positives = 39/167 (23%), Gaps = 16/167 (9%)

Query 13 IAAIGIIPWYVDAFLFTTPWNPQPRTINQLPVTATSATTPTQQSNVTLAL-GNRINTD 71  
++ P +P T P P S LAL +R++  
Sbjct 467 APSLATSPALGHPESTPKSLHPWYGITPTSSP--KTKRRPAPRAPASPLALHASRLSHS 524  
Query 72 TALTDYGTNVNGLGINVNR---RRRDIWNIESNPVLAGLAANNFVNG 118  
+ + + + + P G + N  
Sbjct 525 EPPSATPSPALSVESLSSESASQTAGAELEPPAVPKSSSEPAVHAPGTPGNPVSLSTNS 584  
Query 119 SYIAIGNQVFHLPNNLSNVSLNIASGSSGGAGQTVPSNFTFLPMIP 165  
S + G V + S +A + G +G S P  
Sbjct 585 SLASSGELVEPRVEQMPQASPLAPRTRGSSGPPAKPCSGATPTPL 631

> [ref|XP\\_001843226.1|](#) **G** conserved hypothetical protein [Culex quinquefasciatus]

[gb|EFS31285.1|](#) **G** conserved hypothetical protein [Culex quinquefasciatus]  
Length=346

[GENE ID: 6032659 CpipJ\\_CPIJ001686](#) | hypothetical protein  
[Culex quinquefasciatus]

Score = 39.3 bits (89), Expect = 0.77, Method: Composition-based stats.  
Identities = 33/310 (10%), Positives = 75/310 (24%), Gaps = 33/310 (10%)

Query 106 VLAGLAANNPVGSYIAIGNQVFHLPNNLSN-----VSLNIASGSSGGAGQTVPSNFST 159  
+ + ++ S + ++ P N+ + + S S +  
Sbjct 49 GMEDGVSEPAIDSSDATVKDE---PENVPKCKVDIIPDDSIKSKALQKLNLPNEV 104  
Query 160 FLPMPIDNYTQAFQKLVTFQTLPLDAMDSIVQTLSDAYSNTFKGLFTAAGLNGLNLE 219  
N Q + ++ T FQ + + + Y K +  
Sbjct 105 PQAPPLPMMGQFWSQITITIFQQPTFEKVEAKQVFNQYRALIKAFSQEWLKFFTKNRQD 164  
Query 220 HGRSVIEDGIQSIDVQGAQGFQVIASFNDSARVQCVGPDLSPTSIGR-RVVGKGTDC 278  
+V+ + + + + + + + +C+ + + +V C  
Sbjct 165 AIANVQKVIQDNTQEIKSFTRKFEFDGLCLPEANECLKSVQNSLKEYSIKVEENTAAC 224  
Query 279 ---VNRKWRQLSDIGGRIAGDILAADRASDFLGNLTTCCNGANFNAAADASSGGTGRNAL 335  
V+R+ Q + + + + + + + C  
Sbjct 225 GEFVDRQLDQHGQLVEDEQKLESG-----MLRIDGC-----FRKKEFLGG 265  
Query 336 RRQCYVRAIGNFPQSLFLPVSILTIEGKLYAALSSQLQTDVALCASEMGLVGLVTAQVS 395  
C NF GK A+++ C E + Q++  
Sbjct 266 VMAVCGSVAANFFHQTSQATQKFATAMGKASAVTNRLGRFRTCVVERKRLLAGGQNOIA 325  
Query 396 SKIAFCQLAQ 405  
K C AQ  
Sbjct 326 QKATACLKAQ 335

> [ref|XP\\_002462548.1|](#) **UG** hypothetical protein SORBIDRAFT\_02g027920 [Sorghum bicolor]

[gb|EER99069.1|](#) **G** hypothetical protein SORBIDRAFT\_02g027920 [Sorghum bicolor]  
Length=542

[GENE ID: 8063762 SORBIDRAFT\\_02g027920](#) | hypothetical protein [Sorghum bicolor]  
(10 or fewer PubMed links)

Score = 39.3 bits (89), Expect = 0.78, Method: Composition-based stats.  
Identities = 35/309 (11%), Positives = 84/309 (27%), Gaps = 25/309 (8%)

Query 38 RTINQLPVTATSATTPTQQSNVTLALG---NRINTDALTLDYGTNVNGLGINVNR--- 94  
+ + +++A + + ++ G +R + +G+ + + R  
Sbjct 150 SDNSDDRTSKSSTAASAPRHDFSSVGFGRERDRARSRAPGAHKGKIRAAVRGASARVA 209  
Query 95 RRDWNIENSNPVLAVLAANNPVGSYIAIGNQVFHLPNNLSNVSLNIASGSSGGAGQTV 154  
A N+ + + H + S V+ N G  
Sbjct 210 -----SSPAEANSRSSVESNLRSSNAAHARRSSSGVTSNGVHKVLPDPDGHQSD 258  
Query 155 SNFSTFLPMIPDNYTQAFQKLVTFQTLPLDAMDSIVQTLSDAYSNTFKGLFTAAGLNG 214  
+ + + + L DS +A + F+ T +GL+  
Sbjct 259 DEPPSADLRYATG--GFYKENGSVIGRLANCDSDSNHIFDEASAGKFENGTHSGLDPY 316  
Query 215 NETLEHGRSVIEDGIQSIDVQGAQGFQVIASFNDSARVQCVGPDLSPTSIGRVRVVGK 274  
E++ +S E I + E + DS+ + + +  
Sbjct 317 AESVALLQSAQEALENI----QKFVEIREETDEDSTTHQSEIEWSSSPVEEL----NE 367  
Query 275 GTDCVNRKWRQLSDIGGRIAGDILAADRASDFLGNLTTCCNGANFNAAADASSGGTGRNA 334  
+ K + + + + I+ D + N CN + +  
Sbjct 368 KIKMLESKLEEATMVINKQDSKIIELDALSQVQPNTIACNNDLLSLPSDQVLLLEKLE 427  
Query 335 LRRQCYVRA 343  
QC++  
Sbjct 428 AEIQCFILT 436

> [ref|XP\\_001644303.1|](#) **G** hypothetical protein Kpol\_1066p9 [Vanderwaltozyma polyspora DSM 70294]

[gb|EDQ16445.1|](#) **G** hypothetical protein Kpol\_1066p9 [Vanderwaltozyma polyspora DSM



70294]  
Length=678

GENE ID: 5544602 Kpo1\_1066p9 | hypothetical protein  
[Vanderwaltozyma polyspora DSM 70294] (10 or fewer PubMed links)

Score = 39.3 bits (89), Expect = 0.81, Method: Composition-based stats.  
Identities = 25/206 (12%), Positives = 57/206 (27%), Gaps = 12/206 (5%)

```
Query 12  LIAAIGIIPWYVDAFLFTTPWNPQPRTINQLPVTSAATPTTQQSNVTLALGNRINTD 71
LI I N + P + S + + L + +N
Sbjct 245  LILEIDTALTILQKQYTIWTENLALNTGVTIISPLEESKSMRSIAAKVTNERDLVDYLNKY 304

Query 72  TALTDYGTNVNGLGINVNRNRNRDIWNIESNPVLAGLAANNPVNGSYIAIGNQVFLHP 131
+ R + +P +A NP + + +
Sbjct 305  -----NKQKSDSILVNRNLIIPVYKHKHPSMAKGLINPTGTSFTVNSSRNTNFK 353

Query 132  NNLSNVSLNIASGSSGGAGQTVPSNFTFLPMIPDNYTQAFQKLVTFQFQTLPLDAMDSIV 191
N+ ++ S+N G + T S ++ + + A ++ + ++ +
Sbjct 354  NSTTSKINTEGGFHSNSSTYNSPANVNNLGGSTKTSLANTAIASSMSGIGMNLSSHTD 413

Query 192  QTLSDAYSNTFKGLFTAAGLNLNET 217
T + + + +F LN N
Sbjct 414  STGNQSPIDNS-SMFKPPSLNPGNGI 438
```

> [ref|ZP\\_05690681.1](#) phage tape measure protein [Staphylococcus aureus A8115]  
[ref|ZP\\_06302931.1](#) tape measure protein [Staphylococcus aureus A8117]  
[gb|EEV76400.1](#) phage tape measure protein [Staphylococcus aureus A8115]  
[gb|EFC03114.1](#) tape measure protein [Staphylococcus aureus A8117]  
Length=1155

Score = 39.3 bits (89), Expect = 0.96, Method: Composition-based stats.  
Identities = 18/186 (9%), Positives = 53/186 (28%), Gaps = 5/186 (2%)

```
Query 122  AIGNQVFLHPNNLSNVSLNIASGSSGGAGQTVPSNFTFLPMIPDNYTQAFQKLVTFQFQ 181
I N ++ L N + +A+ + + I + + + L + T
Sbjct 861  TIWNAIWTFLOTLWNTIVIVATKVVNAITTAISTALQAAWSFISNIWNTIWSPLSSILT 920

Query 182  LPLDAMD--SIVQTLSDAYSNTFKGLFTAAGLNLNETLEHGRSVIEDGIQIVDQGAQG 239
+ + + V + + + G+ ++ + + +Q V+ +V
Sbjct 921  IWNKVVSIFQQVSTISDKMSQAWNFIVTKGMQVSTITSTLINFVNRVVQGFVNVVNVK 980

Query 240  FEQVIASFNDSARVQCCVGPDLSPSISIGRRVVGKGTDCVNRKWRQLSDIGGRIAGDILA 299
+ + + N + V V + R ++ + + + +
Sbjct 981  SQGMTNAVNVKVSFVDDFVSAGA---DMIRGLMRGIGNMARDLAEKAASVAKGALNAAKR 1037

Query 300  ADRGAS 305
A S
Sbjct 1038  ALGIHS 1043
```

> [ref|XP\\_002257750.1](#) **G** SICA antigen (fragment) [Plasmodium knowlesi strain H]  
[emb|CAO38086.1](#) **G** SICA antigen (fragment) [Plasmodium knowlesi strain H]  
Length=1059

GENE ID: 7318622 PKH\_020760 | SICA antigen (fragment)  
[Plasmodium knowlesi strain H] (10 or fewer PubMed links)

Score = 39.3 bits (89), Expect = 0.99, Method: Composition-based stats.  
Identities = 28/213 (13%), Positives = 58/213 (27%), Gaps = 10/213 (4%)

```
Query 135  SNVSLNIASGSSGGAGQTVPSNFTFLPMIPDNYTQAFQKLVTFQFQTLPLDAMDSIVQTL 194
N S+ G + D Q ++ L +D+
Sbjct 451  PNSSIGKMGVVYDSESLCKGGDRKSARTADEKKQQLKENTKSMALFGMNVDTTQSGA 510

Query 195  SDAYSNTFKGLFTAAGLNLNETLEHGRSVIEDGIQIVDQGAQGFQVIASFNDSARV 254
+ + F A + L E +V++D + Q ++ + +
Sbjct 511  GGSAGGNPNPFDALIDDKLTQQEFIEVLKDAFDASSGQV--DTNKINDVVKNITNAS 568

Query 255  QCCVGPDLSPSISIGRRVVGKGTDCVNRKWR-----QLSDIGGRIAGDILAADRASDF 307
QQ + + G + DC+ W + + G++ S
Sbjct 569  QQVQAENCIQKNSGDDKLCRSLDCMKHLWDNKSGKTSNAENFWNKDTGVEVRKLWDELGA 628

Query 308  LGNLTTCNGANFNDAASSGGTGT-RNALRRQC 339
+ + D +GG+ T + +R C
Sbjct 629  IKEKGNQNECKTMDGTGGSRTATDPEKRAC 661
```

> [emb|CAO07542.1](#) MICAL-like 1 [Homo sapiens]  
Length=369

Score = 38.9 bits (88), Expect = 1.0, Method: Composition-based stats.  
Identities = 22/167 (13%), Positives = 39/167 (23%), Gaps = 16/167 (9%)

```
Query 13  IAAIGIIPWYVDAFLFTTPWNPQPRTINQLPVTSAATPTTQQSNVTLAL-GNRINTD 71
++ P +P T P P S LAL +R++
Sbjct 18  APSLATSPALGHPESTPKSLHPWYGITPTSSP--KTKRPPAPRAPSASPLALHASRLSHS 75

Query 72  TALTDYGTNVNGLGINVNRNR-----RRRRDIWNIESNPVLAGLAANNPVNG 118
+ + + + + P G + N
Sbjct 76  EPPSATPSPALSVESLSESASQTAGAELEPPAVPKSSSEPAVHAPGTPGNPVSLSTNS 135

Query 119  SYIAIGNQVFLHPNNLSNVSLNIASGSSGGAGQTVPSNFTFLPMIP 165
S + G V + S +A + G +G S P
Sbjct 136  SLASSGELVEPRVEQMPQASPLAPRTRGSSGPQPAKPCSGATPTPL 182
```

> [dbj|BAB33338.1](#) **G** KIAA1668 protein [Homo sapiens]  
Length=791

GENE ID: 85377 MICALL1 | MICAL-like 1 [Homo sapiens] (Over 10 PubMed links)

Score = 38.9 bits (88), Expect = 1.0, Method: Composition-based stats.  
Identities = 22/167 (13%), Positives = 39/167 (23%), Gaps = 16/167 (9%)

```
Query 13  IAAIGIIPWYVDAFLFTTPWNPQPRTINQLPVTSAATPTTQQSNVTLAL-GNRINTD 71
++ P +P T P P S LAL +R++
Sbjct 369  APSLATSPALGHPESTPKSLHPWYGITPTSSP--KTKRPPAPRAPSASPLALHASRLSHS 426
```

Query 72 TALTDYGTNVNGLGINVNR---RRRRDIWNIESNPVLAGLAANNPVG 118  
+ + + + + P G + N  
Sbjct 427 EPPSATPSPALSVESLSSESASQTAGAELEPPAVPKSSSEPAVHAPGTPGNPVLSTNS 486

Query 119 SYIAIGNQVFLPNNLSNVSLNIASGSSGGAGQTVPSNFTFLPMIP 165  
S + G V + S + A + G + G S P  
Sbjct 487 SLASSGELVEPRVEQMPQASPLAPRTRGSSGPPAKPCSGATPTPL 533

> [ref|ZP\\_04105490.1](#) TMP repeat-containing protein [Bacillus thuringiensis serovar berliner ATCC 10792]  
[ref|ZP\\_04137053.1](#) TMP repeat-containing protein [Bacillus thuringiensis serovar thuringiensis str. T01001]  
[ref|ZP\\_04140675.1](#) TMP repeat-containing protein [Bacillus thuringiensis Bt407]  
[gb|EEM27442.1](#) TMP repeat-containing protein [Bacillus thuringiensis Bt407]  
[gb|EEM31259.1](#) TMP repeat-containing protein [Bacillus thuringiensis serovar thuringiensis str. T01001]  
[gb|EEM62827.1](#) TMP repeat-containing protein [Bacillus thuringiensis serovar berliner ATCC 10792]  
Length=1208

Score = 38.9 bits (88), Expect = 1.3, Method: Composition-based stats.  
Identities = 20/188 (10%), Positives = 60/188 (31%), Gaps = 15/188 (7%)

Query 79 TNVNGLGIVNRRRRRRDIWNIESNPVLAGLAANNPVGSYIAIGNQVFLPNNLSNV 138  
++G + + + I + L + A + + + A+G ++ ++ N +  
Sbjct 580 GVISGALMAIAPIVVSVMGVFEIGAAAALGIVAIPIIIAAIVALGVAVIYKNWDDIKNWT 639

Query 139 LNIASGSSGGAGQTVPSNFT---FLPMIPDNYTQAFQKLVTFQTLPLDAM-----D 188  
+ + + + + D + F + F L + +  
Sbjct 640 IEAWDSIKEYLVELWDGISQCSSEAWSSFLDVMHEFFDPIGQFFSDLWEGVKQACSDAWN 699

Query 189 SIVQTLSDAYSNTFKGLFTAAGLNLNETLEHGRSVIEDGIQSIQSDQGAQGFQVIASFN 248  
S V+ S+A+S+ + + + + E S+ +++ + E +  
Sbjct 700 STVEFFSEAWSSFIEMM-----HSFFDPIGEFFSLSLWGSIVETASSWSSLVETASELWG 754

Query 249 DSSARVQQ 256  
+ Q+  
Sbjct 755 TLTQAWQE 762

> [emb|CAD38718.1](#) **G** hypothetical protein [Homo sapiens]  
Length=657

[GENE ID: 85377 MICALL1](#) | MICAL-like 1 [Homo sapiens] (Over 10 PubMed links)

Score = 38.5 bits (87), Expect = 1.4, Method: Composition-based stats.  
Identities = 22/167 (13%), Positives = 39/167 (23%), Gaps = 16/167 (9%)

Query 13 IAAIGIIPWYVDAFLFTTPWNPQPRTINQLPVTSAATSATPTQSSNVTAL-GNRINTD 71  
++ P +P T P P S LAL +R++  
Sbjct 235 APSLATSPALGHPESTPKSLHPWYGITPTSSP--KTKRPPAPRAPSASPLALHASRLSHS 292

Query 72 TALTDYGTNVNGLGINVNR---RRRRDIWNIESNPVLAGLAANNPVG 118  
+ + + + + P G + N  
Sbjct 293 EPPSATPSPALSVESLSSESSQTAGAELEPPAVPKSSSEPAVHAPGTPGNPVLSTNS 352

Query 119 SYIAIGNQVFLPNNLSNVSLNIASGSSGGAGQTVPSNFTFLPMIP 165  
S + G V + S + A + G + G S P  
Sbjct 353 SLASSGELVEPRVEQMPQASPLAPRTRGSSGPPAKPCSGATPTPL 399

> [ref|ZP\\_03158061.1](#) Hemolysin-type calcium-binding region [Cyanotheca sp. PCC 7822]  
[gb|EDX94266.1](#) Hemolysin-type calcium-binding region [Cyanotheca sp. PCC 7822]  
Length=3976

Score = 38.5 bits (87), Expect = 1.5, Method: Composition-based stats.  
Identities = 30/298 (10%), Positives = 82/298 (27%), Gaps = 16/298 (5%)

Query 41 NQLPVTSAATSATPTQSSNVTALGNRINTDTALTDYGTNVNGLGINVNR---RRRRDIWN 100  
+ATS +++ ++ + NT + T + + + + + +  
Sbjct 1175 TADFNFATSTANI IDPTPNLDLGISYSDISNTSLLVNPSYTGKGNITLPLEFKGLNLFQFLET 1234

Query 101 IESNPVLAGLAANNPVGSYIAIGNQVFLPNNLSNVSLNIASGSSGGAGQTVPSNFTSF 160  
++ ++ +A NN + + N ++ + S  
Sbjct 1235 PRTDLIVNFAIENNKIIKTVPKPK-----FNPSIDLEEKIKSLQNFSLDDVSNL 1284

Query 161 LPMIPDNYTQAFQKLVTFQTLPLDAMDSDIVQTL--SDAYSNTFKGLFTAAGLNLNETL 218  
+ L + L + + + + L N + K + + T  
Sbjct 1285 AEQVITFLDNKNLSLFNEKVPLVDQSIINELGFLNPIKERYNKYKESLDSLQNVLAEKTE 1344

Query 219 EHGRSVIEDGIQSIQSDQGAQGFQVIASFNDSARVQQCVGPDLSPTSIGRRVVGKGTDC 278  
+ E + + A + Q+ + + + + + + + +  
Sbjct 1345 KFENLIFEPSL--LSQLPASVSQQLQNTLATLNKADLNPLSGLDLILKGIQPELISAINQ 1402

Query 279 VNRKWRQL-SDIGGRIAGDILAADRASDFLGNLTTTCNGANFNADASSGGTGRNAL 335  
+ L I + I A F L T F D++ + N  
Sbjct 1403 IQELIKSLPQQSINTIKDEIDNAINSLP-FSDKLNTAKNNLFAVLDSADLNLESFNQA 1459

> [ref|XP\\_001122565.1](#) **UG** PREDICTED: hypothetical protein [Apis mellifera]  
Length=177

[GENE ID: 726847 LOC726847](#) | hypothetical protein LOC726847 [Apis mellifera]  
(10 or fewer PubMed links)

Score = 38.5 bits (87), Expect = 1.5, Method: Composition-based stats.  
Identities = 10/105 (9%), Positives = 28/105 (26%), Gaps = 1/105 (0%)

Query 214 LNETLEHGRSVIEDGIQSIQSDQGAQGFQVIASFNDSARVQQCVGPDLSPTSIGRRVVG 273  
+ E + + D + + + + + C + + + +  
Sbjct 65 VEEMKKSERINTDARNFVNNILKTMGFELKN-LKKYKMGMSDCNAKEKELDHLDFQFID 123

Query 274 KGTDCVNRKWRQLSDIGGRIAGDILAADRASDFLGNLTTTCNGAN 318  
+C +RK + + I ++ N C N  
Sbjct 124 STNNCTSRKLNIAIQLTVEINTKSENLLNLDLNNISTNAAKCTIN 168

> [ref|XP\\_001580855.1](#) **G** hypothetical protein [Trichomonas vaginalis G3]  
[gb|EAY19869.1](#) **G** hypothetical protein TVAG\_129770 [Trichomonas vaginalis G3]

Length=2050

[GENE ID: 5465399 TVAG\\_129770](#) | hypothetical protein [Trichomonas vaginalis G3]  
(10 or fewer PubMed links)

Score = 38.5 bits (87), Expect = 1.6, Method: Composition-based stats.  
Identities = 20/148 (13%), Positives = 41/148 (27%), Gaps = 3/148 (2%)

```
Query 18 IIPWYVDAFLFTTPWNPQPPRTINQLPVTSAATSATTPTQSSNVTLALGNRINTDTALTDY 77
      P + T W + ++ S SN + N T + Y
Sbjct 701 TTPAWALPSSGATSWEAWSKNVKHTENTSAQHSPPSPVSSNNPVPVSLNIPQTTVNPFSAY 760

Query 78 GTNVNGLGINVNRRRRRRIWNIESNPVLAGLAANNPVNGSYIAIGNQVFLPNNLSNV 137
      + + + + P + N I + N P N S
Sbjct 761 SPQTSPPQAPPNNKVNQPYIPGMAPTKPPIVSSPLAPQTN-KQIFVPPNNAP--PPNSSKP 817

Query 138 SLNIASGSSGGAGQTVPSNFSFPLMIP 165
      S+ I + + P++ + ++P +
Sbjct 818 SIMIPGVTTPVPAPSQPTSSAPYIPGMS 845
```

> [ref|XP\\_001648260.1|](#) **UG** hypothetical protein AaeL\_AAEL014240 [Aedes aegypti]  
[gb|EAT33485.1|](#) **G** hypothetical protein AaeL\_AAEL014240 [Aedes aegypti]  
Length=292

[GENE ID: 5563936 AaeL\\_AAEL014240](#) | hypothetical protein [Aedes aegypti]  
(10 or fewer PubMed links)

Score = 38.5 bits (87), Expect = 1.6, Method: Composition-based stats.  
Identities = 39/271 (14%), Positives = 83/271 (30%), Gaps = 14/271 (5%)

```
Query 133 NLSNVSLNIASGSSGGAGQTVPSNFSFPLMIPDNYTQAFQKLVTFQTLPLDAMDSIVQ 192
      N+S +L A T + +T N + + +FQ + + +
Sbjct 33 NISKTTLAAAIQQLNTTINTADESVNTAWTQFTQNMASLYTLNRFQNYTTFDLTPLNR 92

Query 193 TLDSDAYS--NTPKGLFTAAGLNLNETLEHGRSVIEDGIQSIDVQGAQGFQVIASFNDS 250
      T+ D + + + + ++ V ++
Sbjct 93 TICDLQMTLSPQPQIDWSTNQIFSDVQASALQVETALNTAVQTMNSCAPSCANPTK-- 150

Query 251 SARVQCVGPDLSPTSIGRRVVGKGTDCVNRKWRQLSDIGGRIAGDILAADRASDFLGN 310
      V C + + + TDCV + + SDIG ++A A ++L
Sbjct 151 ---VATCTTKFGPRLTTPITIDRLTDCVTAELARYSDIGSKMAAQYNSVLTSAMNYLKV 207

Query 311 LTTTCNGANFNAADASSGGTGRNALRRQCYVRAIGNFPQSLFLPVSILTIEGKLYAALS 370
      + C+ A + + + + QC + + +P+++ Y
Sbjct 208 VDVCDT---PAPEVLNPNPSPMYASPSTQCMTQYLQVRSN---MPINVYTVDSMRYPQTY 260

Query 371 SLQTDVALCASEMGLEIGLVTAQVSSKIAFC 401
      +Q V CA + L+I +V C
Sbjct 261 LIQNRVQRCAKLVELDIKDRITKVLSEFQNC 291
```

> [gb|EEZ97902.1|](#) hypothetical protein TcasGA2\_TC000287 [Tribolium castaneum]  
Length=438

Score = 38.5 bits (87), Expect = 1.7, Method: Composition-based stats.  
Identities = 31/219 (14%), Positives = 62/219 (28%), Gaps = 6/219 (2%)

```
Query 188 DSIVQTLSDAYSNTFKGLFTAAGLNLNETLEHGRSVIEDGIQSIDVQGAQGFQVIASF 247
      DS V T + + A N L + + A + + S
Sbjct 215 DSNVSTVYTEATITILQNDAKALLQNLSELALGNILVAHQINDLGSNLAAFSTDVIFKSE 274

Query 248 NDSSARVQCVGPDLSPTSIGRRVVGKGTDCVNRKWRQLSDIGGRIAGDILAADRAS-- 305
      LD I Q + + S+ V ++C++ +L + I G
Sbjct 275 LDIQEBTQAIDEESINFKSLADAVNKNISECLDGNEDKLLKLPETFRKQIRECVAGVQKE 334

Query 306 --DFLGNLTTTCNGANFNAADASSGGTGRNALRRQCYVRAIGNFPQSLFLPVSILTIEG 363
      L + + N + G C + + + + +P+ + +E
Sbjct 335 SDSLSKVFYNIIDIMNVVHDLNFQLGQCADDNSCISAVVDKINEAMENIPLKIKVEIN 394

Query 364 KLYAALSSLQTDVALCA-SEMGLEIGLVTAQVSSKIAFC 401
      + Q + CA S + + VT +S + C
Sbjct 395 SASDQVELYQAKIQCADSGVAGYVENVTDIMSD-VTVC 432
```

> [ref|ZP\\_05688243.1|](#) phage tape measure protein [Staphylococcus aureus A9299]  
[gb|LEW73671.1|](#) phage tape measure protein [Staphylococcus aureus A9299]  
Length=1154

Score = 38.2 bits (86), Expect = 1.8, Method: Composition-based stats.  
Identities = 20/186 (10%), Positives = 53/186 (28%), Gaps = 5/186 (2%)

```
Query 122 AIGNQVFLPNNLSNVSLNIASGSSGGAGQTVPSNFSFPLMIPDNYTQAFQKLVTFQFT 181
      I N + + L N + +A+ T+ + I + + + L T
Sbjct 860 TIWNAIWTFLQTLWNTIIVTVATKVWNAITTTISTALQAAWSFISNIWNTIWSFLSGILT 919

Query 182 LPLDAMD--SIVQTLSDAYSNTFKGLFTAAGLNLNETLEHGRSVIEDGIQSIDVQGAQ 239
      + + + + V + + G+ ++ + + IQ V+ + +
Sbjct 920 IWNKVVSIPTQVVTISDKMSQAWNFIVTKGMQVWVSTITSTLINFVNRVYIQGFVNVVNVK 979

Query 240 FEQVIASFNDSARVQCVGPDLSPTSIGRRVVGKGTDCVNRKWRQLSDIGGRIAGDILA 299
      + + + N + V V + R ++ + + + +
Sbjct 980 SQGMTNAVNVKVSFVDDFVSAGA---DMIRGLMRGIGNMARDLAEKAASVAKGALNAKR 1036

Query 300 ADRGAS 305
      A S
Sbjct 1037 ALGIHS 1042
```

> [ref|XP\\_002767144.1|](#) **G** centromere protein a, putative [Perkinsus marinus ATCC 50983]  
[gb|ERQ99861.1|](#) **G** centromere protein a, putative [Perkinsus marinus ATCC 50983]  
Length=925

[GENE ID: 9051972 Pmar\\_PMAR006533](#) | centromere protein a, putative  
[Perkinsus marinus ATCC 50983]

Score = 38.2 bits (86), Expect = 2.1, Method: Composition-based stats.  
Identities = 25/201 (12%), Positives = 45/201 (22%), Gaps = 6/201 (2%)

```
Query 14 AAIGIIPWYVDAFLFTTPWNPQPPRTINQLPVTSAATSATTPTQSSNVTLALGNRINTDTA 73
```

Sbjct 145 VQSMESPTRPSPVSWTISVTDLTPRKINNSPRQLTNRNPRKSSDNHQHVKEAPRRSSNAP 204  
Query 74 LTDYGTNVNGLGINVNRNRDRDIWNIESNPVLAGLAANNPVNGSYIAIG-NQVFLPN 132  
Sbjct 205 RGTSNTPRETSTNTPRETSTNTPRETSTNTPPVANNTPRVISNTPRGTSNTPRGTSNTPRGAS 264  
Query 133 NLSNVSLNIASGSSGGAGQTVPSN--FSTFLPMIPDNYTQAFQKLVTFQTLPLDAMDSI 190  
Sbjct 265 NTPRGTSNTPRGTSNTPRGTSNTPRGTSNTPRGTSNTPRGTSNTPRGTSNTPRGTSNTP 323  
Query 191 --VQTLSDAYSNTFKGLFTA 209  
Sbjct 324 RGTSNTPRGTSNTPRGTSNTP 344

> [ref|YP\\_239580.1|](#) **G** ORF001 [Staphylococcus phage 69]

[gb|AAK90756.1|](#) **G** ORF001 [Staphylococcus phage 69]  
Length=1155

[GENE\\_ID: 5132759\\_69ORF001](#) | ORF001 [Staphylococcus phage 69]  
(10 or fewer PubMed links)

Score = 38.2 bits (86), Expect = 2.1, Method: Composition-based stats.  
Identities = 18/186 (9%), Positives = 52/186 (27%), Gaps = 5/186 (2%)

Query 122 AIGNQVFLPNLNSVSLNIASGSSGGAGQTVPSNFSFSTFLPMIPDNYTQAFQKLVTFQ 181  
Sbjct 861 TIWNAIWTFQLTWNITIVATKVNWAITTAISTALQAASWFSINIWNTIWSFLSGILIT 920  
Query 182 LPLDAMD--SIVQTLSDAYSNTFKGLFTAAGLNLNETLEHGRSVIEDGIQSIVDQGAQG 239  
Sbjct 921 IWNVVSIPTQVSTISDKMSQAWNFIVTKGMQVSTITSTLINFVNRVQGFVNVVNVK 980  
Query 240 FEQVIASFNDSARVQCVGPDLSPTSIGRRVVGKGTDCVNRKWRQLSDIGRIAGDILA 299  
Sbjct 981 SQGMTNAVNKVKSFVDDFVSAGA---DMIRGLMRGIGNMARDLAEKAASVAKGALNAKR 1037  
Query 300 ADRGAS 305  
Sbjct 1038 ALGIHS 1043

> [ref|ZP\\_01630797.1|](#) hypothetical protein N9414\_06069 [Nodularia spumigena CCY9414]

[gb|EAN44609.1|](#) hypothetical protein N9414\_06069 [Nodularia spumigena CCY9414]  
Length=375

Score = 38.2 bits (86), Expect = 2.1, Method: Composition-based stats.  
Identities = 25/201 (12%), Positives = 55/201 (27%), Gaps = 5/201 (2%)

Query 33 NPQPPRTINQLPVTSAATPTQQSNVTLALGNRINTDALTLDYGTNVNGLGINVNR 92  
Sbjct 174 SSPPTGTPTSPT-GVNTQENSQNPNSISFSQTP-VNQAQNSQLSGFNGEIANPINSLEK 231  
Query 93 RRRRDIWNIESNPVLAGLAANNPVNGSYIAIGNQVFLPNLNSVSLNIASGSSGGAGQ 152  
Sbjct 232 TAAGGMQVIPSNNGLPSQGVYPTGLNAATGVQPTVGPNNLPP--NAVNVQVNTIEGLP 288  
Query 153 VPSNFSFSTFLPMIPDNYTQAFQKLVTFQTLPLDAMDSIVQTLSDAYSNTFKGLFTAAGLN 212  
Sbjct 289 SPVQPNVSIPLPSGVEGVQTNFAPNSSIQAPSPDIVAPMSFVADNNGNLIWRSPAQQ 348  
Query 213 GLNETLEHGRSVIEDGIQSI 233  
Sbjct 349 MQPNSLDSQIPGQNRGLQDID 369

> [ref|XP\\_002420533.1|](#) **G** RNA-binding protein, putative [Candida dubliniensis CD36]

[emb|CAX41612.1|](#) **G** RNA-binding protein, putative [Candida dubliniensis CD36]  
Length=954

[GENE\\_ID: 8048216\\_CD36\\_52280](#) | RNA-binding protein, putative  
[Candida dubliniensis CD36]

Score = 37.8 bits (85), Expect = 2.3, Method: Composition-based stats.  
Identities = 20/163 (12%), Positives = 47/163 (28%), Gaps = 16/163 (9%)

Query 29 TTPWNPQPPRTINQLPVTSAAT---TPTQQSNVTLALGNRINTDALTLDYGTNVNGLG 85  
Sbjct 14 NISLGLSTSPNTISSGGSDSTIGHLNTPPTTRVRSGLSFWNEPSLSHNSNNTSNGHE 73  
Query 86 INVNRNRNRDRDIWNIESNPVLAGLAANNPVNGSYIAIGNQVFLPNLNSVSLNIASG 134  
Sbjct 74 MATSTSRNRSYTTGALPSITIDSPSESLQKSSAPRVSTSPFISVFNNDMIVLDFNQTNL 133  
Query 135 SNVSLNIASGSSGGAGQTVPSNFSFSTFLPMIPDNYTQAFQKLV 177  
Sbjct 134 PRLRSQTISGTPISSQNTLPHPSSELNA--PHHPQVVFETVSS 174

> [ref|XP\\_001032003.1|](#) **G** hypothetical protein THERM\_00703320 [Tetrahymena thermophila]

[gb|EAR84340.1|](#) **G** hypothetical protein THERM\_00703320 [Tetrahymena thermophila  
SB210]  
Length=3324

[GENE\\_ID: 7823579\\_THERM\\_00703320](#) | hypothetical protein  
[Tetrahymena thermophila]

Score = 37.8 bits (85), Expect = 2.6, Method: Composition-based stats.  
Identities = 25/191 (13%), Positives = 46/191 (24%), Gaps = 11/191 (5%)

Query 85 GINVNRNRNRDRDIWNIESNPVLAGLAANNPVNGSYIAIGNQVFLPNLNSVSLNIASG 144  
Sbjct 2759 NANSQQNVSEIQVDSILSEPFAPQPTANFDTRSSISSIKREPIYSGNTYTASVSGIPI 2818  
Query 145 SSGGA-GQTVPSNFSFSTFLPMIPDNY--TQAFQKLVTFQTLPLDAMDSIVQTLSDAYSNT 201  
Sbjct 2819 QPYSSWTFVSLNSSGGTAFLGLPVSQQNKNSQPQTNQNSANQTLFVSPGNEKILGNSP 2878

Query 202 FKGLFTAAGLNGLNETLEHGRSVIEDGIQISVDQGAQGFQVIA SFNDSSARVQCVCVGD 261  
K ++ L + + + + + SFN Q V  
Sbjct 2879 LKSSVPG---TNKQILSGLPTYTPSIL----MSTSPSKLPNNSFNQGEKDKQSSVRS 2930

Query 262 LSPTSIGRRVV 272  
+ ++ ++ +  
Sbjct 2931 GAVSNEYKQAL 2941

> [ref|ZP\\_06324921.1](#) | tape measure protein [Staphylococcus aureus subsp. aureus D139]  
[gb|EFB49148.1](#) | tape measure protein [Staphylococcus aureus subsp. aureus D139]  
Length=1154

Score = 37.8 bits (85), Expect = 2.6, Method: Composition-based stats.  
Identities = 18/186 (9%), Positives = 53/186 (28%), Gaps = 5/186 (2%)

Query 122 AIGNQVPHLPNNLSNVSLNIASGSSGGAGQTVPSNFSTFLPMIPDNYTQAFQKLVTFQFT 181  
I N ++ L N + +A+ + + I + + + L T  
Sbjct 860 TIWNAIWTFLQTLWNTIVTVATKVWNAITTAISTALQAAWSFISNIWNTIWSFLSGILTT 919

Query 182 LPLDAMD--SIVQTLSDAYSNTFKGLFTAAGLNGLNETLEHGRSVIEDGIQISVDQGAQ 239  
+ + + V + + + G+ ++ + + IQ V+ + +  
Sbjct 920 IWNVVSIPTQVVTISDKMSQAWNFIVTKGMQVWVSTITSTLINFVNRVIQGFVNVVNVK 979

Query 240 FEQVIASFNDSARVQCVCVGDPLSPTSIGRRVVGKGTDCVNRKWRQLSDIGGRIAGDILA 299  
+ + + N + + + V + + + R + + + + + + + + + +  
Sbjct 980 SQGMTNTVNIKIFIGDFVSAGA---DMIRGLIRGIGQMAGQLVDAAKNVAKKALDAKS 1036

Query 300 ADRGAS 305  
A S  
Sbjct 1037 ALGIHS 1042

> [dbj|BAE38328.1](#) |  unnamed protein product [Mus musculus]  
[gb|EDL31272.1](#) |  RIKEN cDNA A430110N23 [Mus musculus]  
[gb|AAI41045.1](#) |  RIKEN cDNA A430110N23 gene [Mus musculus]  
Length=1371

[GENE ID: 269855\\_A430110N23Rik](#) | RIKEN cDNA A430110N23 gene [Mus musculus]  
(10 or fewer PubMed links)

Score = 37.8 bits (85), Expect = 2.8, Method: Composition-based stats.  
Identities = 25/203 (12%), Positives = 44/203 (21%), Gaps = 15/203 (7%)

Query 8 VLALLIAAIGIIPWYDAFLFT----TPWNPQPRTINQLPVTSATSATT--PTQQSNV 60  
+L + P T + T P T A P +  
Sbjct 1047 LLPTRSPELSGSPPTPTSPEGLTSASSMLSEVSRLSPTSELTPGPDTPAPEIIPESDSS 1106

Query 61 TLALGNRINTDALTLDYGTNVNGLGINVNRNRNRNRDIWNIESNPVLAGLAANNPVNGSY 120  
L + R T + T++ L + + + P N  
Sbjct 1107 DLPNTRTPTQPTTASHPTSIPQLNNTTSYPTIAPQPTTNPQPRSPHPATSPQPPTNTHP 1166

Query 121 IAIGNQVPHLPNNLSNVSLNIASGSSGGAGQTVPSNFSTFLPMIPDNYTQAFQKLVTFQ 180  
+ + + SL + + + N P Q L  
Sbjct 1167 SSTP-----ATPTESLPSRRKTELSSPTKPRLNSELTFEAPSTDASQTQNLFLA 1218

Query 181 TLPLDAMDSIVQTLSDAYSNTFK 203  
+ + S L ++ FK  
Sbjct 1219 SESGPSSPASNLDPPTDAFK 1241

> [ref|NP\\_766596.1](#) |  group B scavenger receptor cysteine-rich domain-containing precursor [Mus musculus]  
[sp|O8BV57.1|SRCRL\\_MOUSE](#) |  RecName: Full=Scavenger receptor cysteine-rich domain-containing protein LOC284297 homolog; Flags: Precursor  
[dbj|BAC37780.1](#) |  unnamed protein product [Mus musculus]  
[gb|ACF54723.1](#) |  group B scavenger receptor cysteine-rich domain-containing protein [Mus musculus]  
Length=1371

[GENE ID: 269855\\_A430110N23Rik](#) | RIKEN cDNA A430110N23 gene [Mus musculus]  
(10 or fewer PubMed links)

Score = 37.8 bits (85), Expect = 2.8, Method: Composition-based stats.  
Identities = 25/203 (12%), Positives = 44/203 (21%), Gaps = 15/203 (7%)

Query 8 VLALLIAAIGIIPWYDAFLFT----TPWNPQPRTINQLPVTSATSATT--PTQQSNV 60  
+L + P T + T P T A P +  
Sbjct 1047 LLPTRSPELSGSPPTPTSPEGLTSASSMLSEVSRLSPTSELTPGPDTPAPEIIPESDSS 1106

Query 61 TLALGNRINTDALTLDYGTNVNGLGINVNRNRNRNRDIWNIESNPVLAGLAANNPVNGSY 120  
L + R T + T++ L + + + P N  
Sbjct 1107 DLPNTRTPTQPTTASHPTSIPQLNNTTSYPTIAPQPTTNPQPRSPHPATSPQPPTNTHP 1166

Query 121 IAIGNQVPHLPNNLSNVSLNIASGSSGGAGQTVPSNFSTFLPMIPDNYTQAFQKLVTFQ 180  
+ + + SL + + + N P Q L  
Sbjct 1167 SSTP-----ATPTESLPSRRKTELSSPTKPRLNSELTFEAPSTDASQTQNLFLA 1218

Query 181 TLPLDAMDSIVQTLSDAYSNTFK 203  
+ + S L ++ FK  
Sbjct 1219 SESGPSSPASNLDPPTDAFK 1241

> [ref|NP\\_803295.1](#) |  tape measure protein [Staphylococcus phage 11]  
[gb|AAL82270.1](#) |  tape measure protein [Staphylococcus phage 11]  
Length=910

[GENE ID: 1258053\\_ph11\\_42](#) | tape measure protein [Staphylococcus phage 11]  
(10 or fewer PubMed links)

Score = 37.8 bits (85), Expect = 2.8, Method: Composition-based stats.  
Identities = 17/183 (9%), Positives = 51/183 (27%), Gaps = 5/183 (2%)

Query 125 NQVPHLPNNLSNVSLNIASGSSGGAGQTVPSNFSTFLPMIPDNYTQAFQKLVTFQTLPL 184  
N ++ L N + +A+ + + I + + + L T+  
Sbjct 619 NAIWTFQLWNTIVTVATKVWNAITTAISTALQAAWSFISNIWNTIWSFLSGILTTIWN 678

Query 185 DAMD--SIVQTLSDAYSNTFKGLFTAAGLNLNETLEHGRSVIEDGIQSIVDQGAQGFEQ 242  
+ + V + + + G+ ++ + + +Q V+ + +  
Sbjct 679 KVVSIPTQVVSTISDKMSQAWNFIVTKGMQWVSTITSTLINFVNRVVGQFVNVVNVKVSQG 738

Query 243 VIASFNDSSARVQCVGPDLSPTSIGRRVVGKGTDCVNRKWRQLSDIGGRIAGDILAADR 302  
+ + N + V V + R ++ + + + A  
Sbjct 739 MTNAVNKVKSFVDDFVSAGA---DMIRGLMRGIGNMARDLAEKAASVAKGALNAAKRALG 795

Query 303 GAS 305  
S  
Sbjct 796 IHS 798

> [ref|YP\\_500528.1|](#) **G** phage tape measure protein [Staphylococcus aureus subsp. aureus NCTC 8325]

[gb|ABD31087.1|](#) **G** phage tape measure protein [Staphylococcus aureus subsp. aureus NCTC 8325]  
Length=1155

[GENE ID: 3920485 SAOUHSC\\_02033](#) | phage tape measure protein [Staphylococcus aureus subsp. aureus NCTC 8325]

Score = 37.8 bits (85), Expect = 2.9, Method: Composition-based stats.  
Identities = 17/183 (9%), Positives = 51/183 (27%), Gaps = 5/183 (2%)

Query 125 NQVPHLPNNLSNVSLNIASGSSGGAGQTVPSNFSFPLMIPDNYTQAFQKLVTFQTLPL 184  
N ++ L N + +A+ + + I + + L T+  
Sbjct 864 NAIWTFQLTLWNTIVTVATKVNWNAITTAISTALQAAWFSISNIWNTIWSFLSGILTTIWN 923

Query 185 DAMD--SIVQTLSDAYSNTFKGLFTAAGLNLNETLEHGRSVIEDGIQSIVDQGAQGFEQ 242  
+ + V + + + G+ ++ + + +Q V+ + +  
Sbjct 924 KVVSIPTQVVSTISDKMSQAWNFIVTKGMQWVSTITSTLINFVNRVVGQFVNVVNVKVSQG 983

Query 243 VIASFNDSSARVQCVGPDLSPTSIGRRVVGKGTDCVNRKWRQLSDIGGRIAGDILAADR 302  
+ + N + V V + R ++ + + + A  
Sbjct 984 MTNAVNKVKSFVDDFVSAGA---DMIRGLMRGIGNMARDLAEKAASVAKGALNAAKRALG 1040

Query 303 GAS 305  
S  
Sbjct 1041 IHS 1043

> [ref|YP\\_627836.1|](#) **G** outer membrane protein HopI [Helicobacter pylori HPAG1]  
[gb|ABF85162.1|](#) **G** outer membrane protein HopI [Helicobacter pylori HPAG1]  
Length=696

[GENE ID: 4097996 HPAG1\\_1095](#) | outer membrane protein HopI [Helicobacter pylori HPAG1] (10 or fewer PubMed links)

Score = 37.4 bits (84), Expect = 3.0, Method: Composition-based stats.  
Identities = 20/163 (12%), Positives = 36/163 (22%), Gaps = 11/163 (6%)

Query 95 RRDWNIENSPVLAGL----AANNPVNGSYIAIGNQVPHLPNNLSNVSLNIASGSSGGAG 150  
D N + + N +N IG + P NL N L G  
Sbjct 115 NGDTGNPNPRGNVNAITPDMQSLVNNLNKLTQLIGETLIRNPNLPAKL-----IEVKFG 169

Query 151 QTVPSNFSFPLMIPDNYTQAFQKLVTFQTLPLDAMDSDIVQTLSDAYSNTFKGLFTAAG 210  
S + + + TL + + S N +  
Sbjct 170 N--QSTVIALPEGLANTMNALNNDITNALTTLWYNQTLTNKSFNSGNSVNFSPQVLQHL 227

Query 211 NGLNETLEHGRSVIEDGIQSIVDQGAQGFEQVIASFNDSSAR 253  
+GL + + + F  
Sbjct 228 QDGLATASNQTCSTQNQCTATNEAKSIAQNAQNIFQALMQA 270

> [gb|EEU07699.1|](#) Sef1p [Saccharomyces cerevisiae JAY291]  
Length=1148

Score = 37.4 bits (84), Expect = 3.1, Method: Composition-based stats.  
Identities = 29/214 (13%), Positives = 73/214 (34%), Gaps = 16/214 (7%)

Query 47 SATSATTPTQQSNVTLALGNRINTD--TALTDYGTNVNGLGINVNRNRNRNRDIWNIE-S 103  
A++ + S +A N + + DY +N + +++ +R + + S  
Sbjct 920 DASNDISIPNSIYPVAVPASNPNPQSTKVDYYSNGPSVIPDLMSKRSVSTPVPVHFPAS 979

Query 104 NPVLAGLAANPNVNGSYIAIGNQVPHLPNNLSNVSLNIAS-----GSSGGAGQTVPS 155  
P L N N + I + + +NL NV++N + G S + +  
Sbjct 980 VPGLRNHPVGNLSNNVTLGIDHPIPREHSNLQNVTMNYYNQFSNANAIGRSQSSMSHSRT 1039

Query 156 NFSTFLPMIPDNYTQAFQKLVTFQTLPLDAM----DSIVQTLSDAYSNTFKGLFTAAGL 211  
++ + D ++ ++ P ++ + I ++ +T T++  
Sbjct 1040 PIASKSNMNTDLHSVSDPGSSKSTAYPPLSLFSSKSNDSINSKNTNQRFSGTNTVTSSNF 1099

Query 212 NGLNETLEHGRSVIEDGIQSIVDQGAQGFEQVIA 245  
++ + ++ Q A E +  
Sbjct 1100 QTIDN-ENNVKTPGNKLTDFQOQSAGWIEGNS 1132

> [gb|EDN64553.1|](#) suppressor of essential function [Saccharomyces cerevisiae YJM789]  
Length=1148

Score = 37.4 bits (84), Expect = 3.1, Method: Composition-based stats.  
Identities = 29/214 (13%), Positives = 73/214 (34%), Gaps = 16/214 (7%)

Query 47 SATSATTPTQQSNVTLALGNRINTD--TALTDYGTNVNGLGINVNRNRNRNRDIWNIE-S 103  
A++ + S +A N + + DY +N + +++ +R + + S  
Sbjct 920 DASNDMSIPNSIYPVAVPASNPNPQSTKVDYYSNGPSVIPDLMSKRSVSTPVPVHFPAS 979

Query 104 NPVLAGLAANPNVNGSYIAIGNQVPHLPNNLSNVSLNIAS-----GSSGGAGQTVPS 155  
P L N N + I + + +NL NV++N + G S + +  
Sbjct 980 VPGLRNHPVGNLSNNVTLGIDHPIPREHSNLQNVTMNYYNQFSNANAIGRSQSSMSHSRT 1039

Query 156 NFSTFLPMIPDNYTQAFQKLVTFQTLPLDAM----DSIVQTLSDAYSNTFKGLFTAAGL 211  
++ + D ++ ++ P ++ + I ++ +T T++  
Sbjct 1040 PIASKSNMNTDLHSVSDPGSSKSTAYPPLSLFSSKSNDSINSKNTNQRFSGTNTVTSSNF 1099

Query 212 NGLNETLEHGRSVIEDGIQSIVDQGAQGFEQVIA 245  
++ + ++ Q A E +  
Sbjct 1100 QTIDN-ENNVKTPGNKLTDFQOQSAGWIEGNS 1132



> [ref|NP\\_009487.2](#) | **G** Putative transcription factor, has homolog in Kluyveromyces lactis [Saccharomyces cerevisiae S288c]  
[sp|P34228.4|SEF1\\_YEAST](#) RecName: Full=Putative transcription factor SEF1; AltName: Full=Suppressor protein SEF1; AltName: Full=Suppressor of essential function protein 1  
[gb|EDV12153.1](#) suppressor protein SEF1 [Saccharomyces cerevisiae RM11-1a]  
[gb|EDZ73921.1](#) YBL066Cp-like protein [Saccharomyces cerevisiae AWRI1631]  
[emb|CAY77720.1](#) Sef1p [Saccharomyces cerevisiae EC1118]  
[tpc|DAA07055.1](#) TPA: Putative transcription factor, has homolog in Kluyveromyces lactis [Saccharomyces cerevisiae]  
Length=1148

[GENE ID: 852214 SEF1](#) | Putative transcription factor, has homolog in Kluyveromyces lactis [Saccharomyces cerevisiae S288c] (**Over 10 PubMed links**)

Score = 37.4 bits (84), Expect = 3.2, Method: Composition-based stats.  
Identities = 29/214 (13%), Positives = 73/214 (34%), Gaps = 16/214 (7%)

```
Query 47 SATSATTPTQSSNVTLALGNRINTD--TALTDYGTNVNGLINVNRNRNRDIWNIE-S 103
      A++ + S +A N + + DY +N + +++ +R + + S
Sbjct 920 DASNDISIPNSIYPVAVASVPASNNNPQSTKVDYYSNGPSVIPDLMSKRSVSTPVNHFPPAS 979

Query 104 NPVLAGLAANNPVNGSYIAIGNQVPHLPNNLSNVLSNLIAS-----GSSGGAGQTVPS 155
      P L N N + I + + +NL NV++N + G S +
Sbjct 980 VPGLRNHPVGNLSNNVTLGIDHPIPREHSNLQNVMTMNYNQFSNANAIGRSQSSMSHSRT 1039

Query 156 NFSTFLPMIPDNYTQAFQKLVTFQTLPLDAM----DSIVQTLSDAYSNTFKGLFTAAGL 211
      ++ + D ++ ++ P ++ + I ++ +T T++
Sbjct 1040 PIASKSNMNTDLHSVSDPGSSKSTAYPPLSLFSSKSNDSINSNKTNRQFSTGTNTVTSSNF 1099

Query 212 NGLNETLEHGSRVIEDGIQSIVDQGAQGFEQVIA 245
      ++ + ++ Q A E +
Sbjct 1100 QTIDN-ENNVKTPGNKLTDFQQQSAGWIEGNS 1132
```

> [ref|ZP\\_06327389.1](#) | **G** tape measure protein [Staphylococcus aureus subsp. aureus C427]  
[gb|EFB46672.1](#) | **G** tape measure protein [Staphylococcus aureus subsp. aureus C427]  
Length=1155

Score = 37.4 bits (84), Expect = 3.3, Method: Composition-based stats.  
Identities = 21/187 (11%), Positives = 57/187 (30%), Gaps = 7/187 (3%)

```
Query 122 AIGNQVHPLPNNLSNVLSNIASGSSGGAGQTVPSNFSSTFLPMIPDNYTQAFQKLVTFQFT 181
      I N ++ L N + +A+ + + I + + + L T
Sbjct 861 TIWNAIWTFLQTLWNTIVTVATKVWNAITTAISTALQAAWSFISNIWNTIWSFLSGILTT 920

Query 182 LPLDAMDS---IVQTLSDAYSNTFKGLFTAAGLNLNETLEHGSRVIEDGIQSIVDQGAQ 238
      + + + +V T+SD + G+ ++ + + IQ V+ +
Sbjct 921 IWNVVSTFTQVSTISD-KMSQAWNFIVTKGMQWVSTITSTLINFVNRVIQGFVNVVVK 979

Query 239 GFEQVIASFNDSARVQCVGPDLSPTSIGRRVVGKGTDCVNRKWRQLSDIGGRIAGDIL 298
      + + + N + + + V + R ++ + + +
Sbjct 980 VSQGMTNAVNKIKSFIGDFVSAGA---DMIRGLIRIGQMAGQLVDAAKVAKKALDAK 1036

Query 299 AADRGAS 305
      +A S
Sbjct 1037 SALGIHS 1043
```

> [ref|NP\\_846030.1](#) | **G** prophage LambdaBa01, membrane protein, putative [Bacillus anthracis str. Ames]

[ref|YP\\_020410.1](#) | **G** prophage LambdaBa01, membrane protein [Bacillus anthracis str. 'Ames Ancestor']

[ref|YP\\_029752.1](#) | **G** prophage LambdaBa01, membrane protein, putative [Bacillus anthracis str. Sterne]

[gb|AAP27516.1](#) | **G** putative prophage LambdaBa01, membrane protein [Bacillus anthracis str. Ames]

[gb|AAT32885.1](#) | **G** putative prophage LambdaBa01, membrane protein [Bacillus anthracis str. 'Ames Ancestor']

[gb|AAT55803.1](#) | **G** prophage LambdaBa01, membrane protein, putative [Bacillus anthracis str. Sterne]  
Length=811

[GENE ID: 1086770 BA\\_3774](#) | prophage LambdaBa01, membrane protein, putative [Bacillus anthracis str. Ames] (**10 or fewer PubMed links**)

Score = 37.4 bits (84), Expect = 3.3, Method: Composition-based stats.  
Identities = 17/219 (7%), Positives = 61/219 (27%), Gaps = 25/219 (11%)

```
Query 161 LPMPDNYTQAFQKLVTFQTLPLDAMDSI--VQTLSDAYSNTFKGLFTAAGLNLNETL 218
      I + + + + + + + + + + + + + + + +A + N
Sbjct 414 WNTISSTTSFVWETIKNPLVSCWNGLVAFVMPIFEQIKSWIISVWDTISSATMTVWNAVK 473

Query 219 EHGRSVIEDGIQSIVDQGAQGFEQVIASFNDSARVQCVGPDLSPTSIGRRVVGKGTDC 278
      +S + + + + +I ++N S+ V
Sbjct 474 NFLQSCWNGLVAFVTFPIFNSIKDWIINTWNTISSTT-----SAVWNTIKSF 519

Query 279 VNRKWRQLSDIGGRIAGDILAADRGASDFLGNLTTCCNGANFNAAADSSGGTGRNALRRQ 338
      ++ W + + + +I A + + + + +N ++
Sbjct 520 LSGLWNSIVSTASSVFNNIKEAISTVWNM--ISSTSSSIWNGIKSTLSNIWEGIKST-- 574

Query 339 CYVRAIGNFPQSLFLPVSLEIEGKLYAALSSSLQTDVA 377
      ++ N + + PV + A +++ V
Sbjct 575 --ASSVWNLKDAIMTPVRWV--TNAVSGAFEGMKSAVL 609
```

> [ref|YP\\_001004316.1](#) | **G** tail protein [Staphylococcus phage phiETA2]

[dbi|BAF43871.1](#) | **G** tail protein [Staphylococcus phage phiETA2]  
Length=1155

[GENE ID: 4712350 phiETA2\\_gp56](#) | tail protein [Staphylococcus phage phiETA2]

Score = 37.4 bits (84), Expect = 3.7, Method: Composition-based stats.  
Identities = 18/186 (9%), Positives = 53/186 (28%), Gaps = 5/186 (2%)

```
Query 122 AIGNQVHPLPNNLSNVLSNIASGSSGGAGQTVPSNFSSTFLPMIPDNYTQAFQKLVTFQFT 181
```

Sbjct 861 I N ++ L N + +A+ + + I + + + L T 920  
TIWNAIWTFLOTLWNTIVVATKVWNAITTAISTALQAAWSFISNIWNTIWSFLSGILTT  
Query 182 LPLDAMD--SIVQTLSDAYSNTFKGLFTAAGLNLNETLEHGRSVIEDGIQSIVDQGAQG 239  
+ + + V + + G+ ++ + + IQ V+ +  
Sbjct 921 IWNVVSIPTQVSTISDKMSQAWNFIVTKGMQVWSTITSTLINFVNRVIRVQGFVNVVNVK 980  
Query 240 FEQVIASFNDSARVQCCVGPDLSPSISGRVVVGKGTDCVNRKWRQLSDIGGRIAGDILA 299  
+ + + N + + V + R ++ + + + +  
Sbjct 981 SQGMTNAVNIKSFIDGDFVSAGA---DMIRGLIRIGIQMAGQLVDAAKNVAKKALDAAKS 1037  
Query 300 ADRGAS 305  
A S  
Sbjct 1038 ALGIHS 1043

> [ref|YP\\_874001.1](#) **G** phage tape measure protein [Staphylococcus phage phiNM]  
[ref|YP\\_001332814.1](#) **G** phage tape measure protein [Staphylococcus aureus subsp. aureus  
str. Newman]  
[gb|ABF73082.1](#) **G** phage tape measure protein [Staphylococcus aureus phage phiNm1]  
[dbj|BAF68052.1](#) **G** phage tape measure protein [Staphylococcus aureus subsp. aureus  
str. Newman]  
Length=1155

[GENE ID: 4525414\\_SAPPV1\\_gp52](#) | phage tape measure protein  
[Staphylococcus phage phiNM] (10 or fewer PubMed links)

Score = 37.4 bits (84), Expect = 3.8, Method: Composition-based stats.  
Identities = 18/186 (9%), Positives = 53/186 (28%), Gaps = 5/186 (2%)  
Query 122 AIGNQVHPLPNNLSNVSLNIASGSSGGAGQTVPSNFTFLPMIPDNYTQAFQKLVTFQFT 181  
I N ++ L N + +A+ + + I + + + L T  
Sbjct 861 TIWNAIWTFLOTLWNTIVVATKVWNAITTAISTALQAAWSFISNIWNTIWSFLSGILTT 920  
Query 182 LPLDAMD--SIVQTLSDAYSNTFKGLFTAAGLNLNETLEHGRSVIEDGIQSIVDQGAQG 239  
+ + + V + + G+ ++ + + IQ V+ +  
Sbjct 921 IWNVVSIPTQVSTISDKMSQAWNFIVTKGMQVWSTITSTLINFVNRVIRVQGFVNVVNVK 980  
Query 240 FEQVIASFNDSARVQCCVGPDLSPSISGRVVVGKGTDCVNRKWRQLSDIGGRIAGDILA 299  
+ + + N + + V + R ++ + + + +  
Sbjct 981 SQGMTNAVNIKSFIDGDFVSAGA---DMIRGLIRIGIQMAGQLVDAAKNVAKKALDAAKS 1037  
Query 300 ADRGAS 305  
A S  
Sbjct 1038 ALGIHS 1043

> [ref|ZP\\_00393935.1](#) COG5280: Phage-related minor tail protein [Bacillus anthracis  
str. A2012]  
[ref|ZP\\_02217701.1](#) putative prophage LambdaBa01, membrane protein [Bacillus anthracis  
str. A0488]  
[ref|ZP\\_02394889.1](#) putative prophage LambdaBa01, membrane protein [Bacillus anthracis  
str. A0442]  
[22 more sequence titles](#)  
Length=794

Score = 37.0 bits (83), Expect = 3.8, Method: Composition-based stats.  
Identities = 17/219 (7%), Positives = 61/219 (27%), Gaps = 25/219 (11%)  
Query 161 LPMIPDNYTQAFQKLVTFQFTLPLDAMDSI--VQTLSDAYSNTFKGLFTAAGLNLNETL 218  
I N ++ + + + + + + + + + + + + + + A + N  
Sbjct 397 WNTISSTTSFVWETIKNFVSCWNGLVAFVMPIFEQIKSWIISVWDTISSATMTVWNAVK 456  
Query 219 EHGRSVIEDGIQSIVDQGAQGFQVIASFNDSARVQCCVGPDLSPSISGRVVVGKGTDC 278  
+S + + + +I ++N S+ V  
Sbjct 457 NFLQSCWNGLVAFVTPIFNSIKDWIINTWNTISST-----SAVWNTIKSF 502  
Query 279 VNRKWRQLSDIGGRIAGDILAADRASDFLGNLTCNGANFNAAADASSGGTGRNALRRQ 338  
++ W + + + +I A + + + + + + N ++  
Sbjct 503 LSGLWNSIVSTASSVFNNIKEAISTVWNM---ISSTSSSIWNGIKSTLSNIWEGIKST-- 557  
Query 339 CYVRAIGNFPQSLFLFVSLTIEGKLYAALSSLQTDVA 377  
++ N + + PV + A +++ V  
Sbjct 558 --ASSVWNGLKDAIMTPVRWV--TNAVSGAFEGMKSAVL 592

> [ref|NP\\_371425.1](#) **G** hypothetical protein SAV0901 [Staphylococcus aureus subsp. aureus  
Mu50]  
[ref|YP\\_001441486.1](#) **G** hypothetical protein SAHV\_0896 [Staphylococcus aureus subsp.  
aureus Mu3]  
[ref|ZP\\_05144291.2](#) hypothetical protein Sauram\_04455 [Staphylococcus aureus subsp.  
aureus Mu50-omega]  
[dbj|BAB57063.1](#) **G** hypothetical protein [Staphylococcus aureus subsp. aureus Mu50]  
[dbj|BAF77779.1](#) **G** hypothetical protein [Staphylococcus aureus subsp. aureus Mu3]  
Length=1154

[GENE ID: 1120876\\_SAV0901](#) | hypothetical protein  
[Staphylococcus aureus subsp. aureus Mu50] (10 or fewer PubMed links)

Score = 37.0 bits (83), Expect = 4.1, Method: Composition-based stats.  
Identities = 18/186 (9%), Positives = 53/186 (28%), Gaps = 5/186 (2%)  
Query 122 AIGNQVHPLPNNLSNVSLNIASGSSGGAGQTVPSNFTFLPMIPDNYTQAFQKLVTFQFT 181  
I N ++ L N + +A+ + + I + + + L T  
Sbjct 860 TIWNAIWTFLOTLWNTIVVATKVWNAITTAISTALQAAWSFISNIWNTIWSFLSGILTT 919  
Query 182 LPLDAMD--SIVQTLSDAYSNTFKGLFTAAGLNLNETLEHGRSVIEDGIQSIVDQGAQG 239  
+ + + V + + G+ ++ + + IQ V+ +  
Sbjct 920 IWNVVSIPTQVSTISDKMSQAWNFIVTKGMQVWSTITSTLINFVNRVIRVQGFVNVVNVK 979  
Query 240 FEQVIASFNDSARVQCCVGPDLSPSISGRVVVGKGTDCVNRKWRQLSDIGGRIAGDILA 299  
+ + + N + + V + R ++ + + + +  
Sbjct 980 SQGMTNAVNIKSFIDGDFVSAGA---DMIRGLIRIGIQMAGQLVDAAKNVAKKALDAAKS 1036  
Query 300 ADRGAS 305  
A S  
Sbjct 1037 ALGIHS 1042

> [ref|YP\\_001246278.1](#) | **G** Phage-related protein-like protein [Staphylococcus aureus subsp. aureus JH9]  
[ref|YP\\_001316062.1](#) | **G** phage tape measure protein [Staphylococcus aureus subsp. aureus JH1]  
[ref|ZP\\_05682384.1](#) | phage tail tape measure protein [Staphylococcus aureus A9763]  
[12 more sequence titles](#)  
Length=1155

[GENE ID: 5167582\\_SaurJH9\\_0901](#) | Phage-related protein-like protein [Staphylococcus aureus subsp. aureus JH9]

Score = 37.0 bits (83), Expect = 4.2, Method: Composition-based stats.  
Identities = 19/186 (10%), Positives = 54/186 (29%), Gaps = 5/186 (2%)

```
Query 122 AIGNQVFLPNNLSNVSLNIASGSSGGAGQTVPSNFTFLPMIPDNYTQAFQKLVTFQFT 181
          I N ++ L N + +A+ T+ + I + + + L T
Sbjct 861 TIWNAIWTFQLQTLWNTIVIVATKVVWNAITTTISTALQAAWSFISNIWNTIWSFLSGILTT 920

Query 182 LPLDAMD--SIVQTLSDAYSNTFKGLFTAAGLNLNETLEHGRSVIEDGIQSIDVQGAQG 239
          + + + V + + + G+ ++ + + IQ V+ +
Sbjct 921 IWNVVSIPTQVVSTISDKMSQAWNFIVTKGMQVWVSTITSTLINFVNRVIQGFVNVVNVK 980

Query 240 FEQVIASFNDSARVQCVPDLSPTSIGRRVVGKGTDCVNRKWRQLSDIGGRIAGDILA 299
          + + + N + + + V + + R ++ + + + +
Sbjct 981 SQGMTNAVNIKISFIGDFVSAGA---DMIRGLIRIGQMAGQLVDAAKNVAKKALDAAKS 1037

Query 300 ADRGAS 305
          A S
Sbjct 1038 ALGIHS 1043
```

> [ref|XP\\_001818890.1](#) | **G** hypothetical protein [Aspergillus oryzae RIB40]  
[dbj|BAE56888.1](#) | **G** unnamed protein product [Aspergillus oryzae]  
Length=630

[GENE ID: 5990861\\_AO090001000363](#) | hypothetical protein [Aspergillus oryzae RIB40] (10 or fewer PubMed links)

Score = 37.0 bits (83), Expect = 4.2, Method: Composition-based stats.  
Identities = 19/163 (11%), Positives = 36/163 (22%), Gaps = 15/163 (9%)

```
Query 32 WNPQPRTINQLPVTSATSATTPTQSSNVTLALGNRINTDTALTLDYGTNVNGLGINVNR 91
          W+ P P S + + T+ +
Sbjct 362 WSPFSNAPAYAPPAHLGK--EFPMPSPKRTLDYVEDQPSKRVAMPTTLP-----TSMS 414

Query 92 RRRRRDIWNIESNPVLAGLAANNPVNGSYIAIGNQVFLPNNLSNVSLNIASGSSGGAGQ 151
          + + + P + + N ++ + LP S NIA G
Sbjct 415 TLPAAALAGVPTLPPVLAATSAPSAN---SLSGSISRLPRPNFPPSSNIAPGIPTSVLP 470

Query 152 TVPSNFTFLPMIPDNYTQAF--QKLVTFQTLPLDAMDSDIVQ 192
          N + + Q TQ + + V
Sbjct 471 FPSVANRAM--HSVYNPSTNWPQLPPTQVPPITNGLYNPSVS 511
```

> [ref|ZP\\_06327622.1](#) | tape measure protein [Staphylococcus aureus A9765]  
[gb|EFB9593.1](#) | tape measure protein [Staphylococcus aureus A9765]  
Length=1154

Score = 37.0 bits (83), Expect = 4.3, Method: Composition-based stats.  
Identities = 18/186 (9%), Positives = 53/186 (28%), Gaps = 5/186 (2%)

```
Query 122 AIGNQVFLPNNLSNVSLNIASGSSGGAGQTVPSNFTFLPMIPDNYTQAFQKLVTFQFT 181
          I N ++ L N + +A+ + + I + + + L T
Sbjct 860 TIWNAIWTFQLQTLWNTIVIVATKVVWNAITTAISTALQAAWSFISNIWNTIWSFLSGILTT 919

Query 182 LPLDAMD--SIVQTLSDAYSNTFKGLFTAAGLNLNETLEHGRSVIEDGIQSIDVQGAQG 239
          + + + V + + + G+ ++ + + IQ V+ +
Sbjct 920 IWNVVSIPTQVVSTISDKMSQAWNFIVTKGMQVWVSTITSTLINFVNRVIQGFVNVVNVK 979

Query 240 FEQVIASFNDSARVQCVPDLSPTSIGRRVVGKGTDCVNRKWRQLSDIGGRIAGDILA 299
          + + + N + + + V + + R ++ + + + +
Sbjct 980 SQGMTNAVNIKISFIGDFVSAGA---DMIRGLIRIGQMAGQLVDAAKNVAKKALDAAKS 1036

Query 300 ADRGAS 305
          A S
Sbjct 1037 ALGIHS 1042
```

> [ref|YP\\_001332062.1](#) | **G** phage tape measure protein [Staphylococcus aureus subsp. aureus str. Newman]  
[gb|ABF73148.1](#) | phage tape measure protein [Staphylococcus aureus phage phiNM2]  
[dbj|BAF67300.1](#) | **G** phage tape measure protein [Staphylococcus aureus subsp. aureus str. Newman]  
Length=1154

[GENE ID: 5330632\\_NWMN\\_1028](#) | phage tape measure protein [Staphylococcus aureus subsp. aureus str. Newman] (10 or fewer PubMed links)

Score = 37.0 bits (83), Expect = 4.4, Method: Composition-based stats.  
Identities = 19/186 (10%), Positives = 54/186 (29%), Gaps = 5/186 (2%)

```
Query 122 AIGNQVFLPNNLSNVSLNIASGSSGGAGQTVPSNFTFLPMIPDNYTQAFQKLVTFQFT 181
          I N ++ L N + +A+ T+ + I + + + L T
Sbjct 860 TIWNAIWTFQLQTLWNTIVIVATKVVWNAITTTISTALQAAWSFISNIWNTIWSFLSGILTT 919

Query 182 LPLDAMD--SIVQTLSDAYSNTFKGLFTAAGLNLNETLEHGRSVIEDGIQSIDVQGAQG 239
          + + + V + + + G+ ++ + + IQ V+ +
Sbjct 920 IWNVVSIPTQVVSTISDKMSQAWNFIVTKGMQVWVSTITSTLINFVNRVIQGFVNVVNVK 979

Query 240 FEQVIASFNDSARVQCVPDLSPTSIGRRVVGKGTDCVNRKWRQLSDIGGRIAGDILA 299
          + + + N + + + V + + R ++ + + + +
Sbjct 980 SQGMTNAVNIKISFIGDFVSAGA---DMIRGLIRIGQMAGQLVDAAKNVAKKALDAAKS 1036

Query 300 ADRGAS 305
          A S
Sbjct 1037 ALGIHS 1042
```

> [ref|YP\\_001949854.1|](#) **G** putative tape measure protein [Staphylococcus phage phiMR25]  
[dbj|BAG48153.1|](#) **G** putative tape measure protein [Staphylococcus phage phiMR25]  
Length=1154

[GENE\\_ID: 6370091\\_orf56](#) | putative tape measure protein  
[Staphylococcus phage phiMR25]

Score = 37.0 bits (83), Expect = 4.4, Method: Composition-based stats.  
Identities = 18/186 (9%), Positives = 53/186 (28%), Gaps = 5/186 (2%)

```
Query 122 AIGNQVFHLPNLSNVSLNIASGSSGGAGQTVPSNFSFSTFLPMIPDNYTQAFQKLVTFQFT 181
          I N ++ L N + +A+ + + I + + + L T
Sbjct 860 TIWNAIWFQTLWNTIIVTVATKVWNAITTAISTALQAAWSFISNIWNTIWSFLSGILTT 919

Query 182 LPLDAMD--SIVQTLSDAYSNTFKGLFTAAGLNLNETLEHGRSVIEDGIQSIQVQGAQG 239
          + + + V + + + G+ ++ + + IQ V+ +
Sbjct 920 IWNKVVSIFTQVSTISDKMSQAWNFIVTKGMQVWSTITSTLINFVNRVIQGFVNVVNVK 979

Query 240 FEQVIASFNDSARVQCCVGPDLSPSTIGRRVVGKGTDCVNRKWRQLSDIGGRIAGDILA 299
          + + + N + + V + R ++ + ++ + +
Sbjct 980 SQGMTNAVNKIKSFIGDFVSAGA---DMIRGLIRIGQMAGQLVDAAKNVAKKALDAAKS 1036

Query 300 ADRGAS 305
          A S
Sbjct 1037 ALGIHS 1042
```

> [ref|YP\\_239735.1|](#) **G** ORF001 [Staphylococcus phage 85]

[gb|AAx90911.1|](#) **G** ORF001 [Staphylococcus phage 85]  
Length=1154

[GENE\\_ID: 5130866\\_85ORF001](#) | ORF001 [Staphylococcus phage 85]  
(10 or fewer PubMed links)

Score = 37.0 bits (83), Expect = 4.7, Method: Composition-based stats.  
Identities = 19/186 (10%), Positives = 54/186 (29%), Gaps = 5/186 (2%)

```
Query 122 AIGNQVFHLPNLSNVSLNIASGSSGGAGQTVPSNFSFSTFLPMIPDNYTQAFQKLVTFQFT 181
          I N ++ L N + +A+ T+ + I + + + L T
Sbjct 860 TIWNAIWFQTLWNTIIVTVATKVWNAITTTIISTALQAAWSFISNIWNTIWSFLSGILTT 919

Query 182 LPLDAMD--SIVQTLSDAYSNTFKGLFTAAGLNLNETLEHGRSVIEDGIQSIQVQGAQG 239
          + + + V + + + G+ ++ + + IQ V+ +
Sbjct 920 IWNKVVSIFTQVSTISDKMSQAWNFIVTKGMQVWSTITSTLINFVNRVIQGFVNVVNVK 979

Query 240 FEQVIASFNDSARVQCCVGPDLSPSTIGRRVVGKGTDCVNRKWRQLSDIGGRIAGDILA 299
          + + + N + + V + R ++ + ++ + +
Sbjct 980 SQGMTNAVNKIKSFIGDFVSAGA---DMIRGLIRIGQMAGQLVDAAKNVAKKALDAAKS 1036

Query 300 ADRGAS 305
          A S
Sbjct 1037 ALGIHS 1042
```

> [ref|XP\\_001870945.1|](#) **UG** conserved hypothetical protein [Culex quinquefasciatus]

[gb|EDS34934.1|](#) **G** conserved hypothetical protein [Culex quinquefasciatus]  
Length=286

[GENE\\_ID: 6043347\\_CpipT\\_CPIJ010754](#) | hypothetical protein  
[Culex quinquefasciatus]

Score = 37.0 bits (83), Expect = 4.7, Method: Composition-based stats.  
Identities = 26/219 (11%), Positives = 61/219 (27%), Gaps = 25/219 (11%)

```
Query 184 LDAMDSIVQTLSDAYSNTFKGLFTAAGLNLNETLEHGRSVIEDGIQSIQVQGAQGFQV 243
          + ++ + T + + L++ + I+ IO+ +
Sbjct 89 SGFLSTVQYF--NQSLQTEGMVNMQISTDLSQLTSTLQQALDITIIQTYSSSLYTLSSM 146

Query 244 IASFNDSARVQCCVGPDLSPSTIGRRVVGKGTDCVNRKWRQLSDIGGRIAGDILAADRG 303
          FN + CV +++ +GK C+ ++ I I I
Sbjct 147 NGVFN----MDICVAKNVQTQMINIPSSIGKLGSCLEQVTTAKAITPIIVSTIKMFKND 201

Query 304 ASDFLGNLTTCCGANFNAADASSGGTGRNALRRQCYVRAIGNFPQSLFLPVLSTIEGG 363
          L C + N + + +L++
Sbjct 202 LKALNAQLQIC-----QPTSNSCIDQYFMNIIYSEMSTIQSALSMVQQ 243

Query 364 KLYAALSSQLQTDVALCASEMGLEIGLVTAQVSSKIAFCQ 402
          + +A T +C+ + +I + S ++ C
Sbjct 244 FISSAQDASTRNRICSDLVTGDIQDAIQIQAQSVSGCS 282
```

> [ref|YP\\_239657.1|](#) **G** ORF001 [Staphylococcus phage 53]

[ref|YP\\_001285370.1|](#) **G** tape measure protein [Staphylococcus phage 80alpha]  
[ref|ZP\\_05642383.1|](#) phage tail tape measure protein [Staphylococcus aureus A9781]  
[ref|ZP\\_05684633.1|](#) tape measure protein [Staphylococcus aureus A9719]

[gb|AAx90832.1|](#) **G** ORF001 [Staphylococcus phage 53]

[gb|ABF71627.1|](#) **G** tape measure protein [Staphylococcus phage 80alpha]  
[gb|EEV25716.1|](#) phage tail tape measure protein [Staphylococcus aureus A9781]  
[gb|EEV66732.1|](#) tape measure protein [Staphylococcus aureus A9719]  
Length=1154

[GENE\\_ID: 5132829\\_53ORF001](#) | ORF001 [Staphylococcus phage 53]  
(10 or fewer PubMed links)

Score = 36.6 bits (82), Expect = 5.0, Method: Composition-based stats.  
Identities = 18/186 (9%), Positives = 53/186 (28%), Gaps = 5/186 (2%)

```
Query 122 AIGNQVFHLPNLSNVSLNIASGSSGGAGQTVPSNFSFSTFLPMIPDNYTQAFQKLVTFQFT 181
          I N ++ L N + +A+ + + I + + + L T
Sbjct 860 TIWNAIWFQTLWNTIIVTVATKVWNAITTAISTALQAAWSFISNIWNTIWSFLSGILTT 919

Query 182 LPLDAMD--SIVQTLSDAYSNTFKGLFTAAGLNLNETLEHGRSVIEDGIQSIQVQGAQG 239
          + + + V + + + G+ ++ + + IQ V+ +
Sbjct 920 IWNKVVSIFTQVSTISDKMSQAWNFIVTKGMQVWSTITSTLINFVNRVIQGFVNVVNVK 979

Query 240 FEQVIASFNDSARVQCCVGPDLSPSTIGRRVVGKGTDCVNRKWRQLSDIGGRIAGDILA 299
          + + + N + + V + R ++ + ++ + +
Sbjct 980 SQGMTNAVNKIKSFIGDFVSAGA---DMIRGLIRIGQMAGQLVDAAKNVAKKALDAAKS 1036
```

Sbjct 980 SQGMTNAVNIKISFIGDFVSAGA---DMIRGLIRGIGQMAGQLVDAAKNVAKKALDAAKS 1036  
Query 300 ADRGAS 305  
A S  
Sbjct 1037 ALGIHS 1042

> [ref|XP\\_002009072.1](#) **G** GI13843 [Drosophila mojavensis]  
[gb|EDW19548.1](#) **G** GI13843 [Drosophila mojavensis]  
Length=1694

GENE ID: 6583404 Dmoj|GI13843 | GI13843 gene product from transcript GI13843-RA  
[Drosophila mojavensis] (10 or fewer PubMed links)

Score = 36.6 bits (82), Expect = 5.7, Method: Composition-based stats.  
Identities = 23/174 (13%), Positives = 51/174 (29%), Gaps = 13/174 (7%)

Query 42 QLPVTSATSATPTQOSNVTLALGNRINTDTALTDYGTNVNGLGINVNRNRDRRDIWNI 101  
+ + + + + N+++ L T G + +  
Sbjct 187 AGHTSESNDSESHSSDSNS---GVANKVDLVAELVSMETTALGPTSTSLGHKSPQTPPTS 243  
Query 102 ESNPVLAGLAANNPVGNSYIA-IGNQVFH---LPNNLSNVSL--NIASGSSGGAGQTVPS 155  
AA N S I+ + + LPN+ S ++ N + +P+  
Sbjct 244 TEQSKQTQTAAPKTKNSNISLLSKPLNIQSPLNSQSTGTILPNQKPKLPYPESPIMP 303  
Query 156 NFFSTFLPMIPDNYTQAFQKLVTFQTLPLDAMDSIVQTLSDAYSNTFKGLFTAA 209  
P ++ + + + + LS Y+N K AA  
Sbjct 304 VSQPTDPHTKESPO---TVSSDKNRDFEETTITYLNSLKMAYANKAKRSIKAA 353

> [ref|YP\\_002332525.1](#) **G** putative tape measure protein [Staphylococcus phage phiSaus-IPLA88]  
[gb|ACI64578.1](#) **G** gp50 [Staphylococcus phage phiSaus-IPLA88]  
Length=1155

GENE ID: 7057011 SauSIPLA88 gp50 | putative tape measure protein  
[Staphylococcus phage phiSaus-IPLA88]

Score = 36.6 bits (82), Expect = 6.3, Method: Composition-based stats.  
Identities = 18/186 (9%), Positives = 53/186 (28%), Gaps = 5/186 (2%)

Query 122 AIGNQVHFLPNNLSNVSLNIASGSSGGAGQTVPSNFTFLPMIPDNYTQAFQKLVTFQFT 181  
I N ++ L N + +A+ + + I + + + L T  
Sbjct 861 TIWNAIWFQTLWNTIIVVATTVWNAITTAISTALQAAWSFISNIWNTIWSFLSGILTT 920  
Query 182 LPLDAMD--SIVQTLSDAYSNTFKGLFTAAGLNLNETLEHGRSVIEDGIQSIVDQGAQG 239  
+ + + V + + + G+ ++ + + IQ V+ + +  
Sbjct 921 IWNKVVSIPTQVSTISDKMSQAWNFIVTKGMQVWVSTITSTLINFVNRVIQFVNVVNVK 980  
Query 240 FEQVIASFNDSSARVQCVGPDLSPTSIGRRVVGKGTDCVNRKWRQLSDIGGRIAGDILA 299  
+ + + N + + + V + R ++ + + + + + +  
Sbjct 981 SQGMTNAVNIKISFIGDFVSAGA---DMIRGLIRGIGQMAGQLVDAAKNVAKKALDAAKS 1037  
Query 300 ADRGAS 305  
A S  
Sbjct 1038 ALGIHS 1042

> [ref|YP\\_084997.1](#) **G** prophage membrane protein [Bacillus cereus E33L]  
[gb|AAU16851.1](#) **G** possible prophage membrane protein [Bacillus cereus E33L]  
Length=726

GENE ID: 3023924 BCZK3413 | prophage membrane protein [Bacillus cereus E33L]  
(10 or fewer PubMed links)

Score = 36.6 bits (82), Expect = 6.4, Method: Composition-based stats.  
Identities = 17/219 (7%), Positives = 61/219 (27%), Gaps = 25/219 (11%)

Query 161 LPMIPDNYTQAFQKLVTFQTLPLDAMDSI--VQTLSDAYSNTFKGLFTAAGLNLNETL 218  
I + + + + + + + + + + + + + + + +A + N  
Sbjct 329 WNTISSTTSFVWETIKNFLVSCWNGLVAFVMPIFEQIKSWIISVWDTISSATMTVWNAVK 388  
Query 219 EHGRSVIEDGIQSIVDQGAQGFQVIASFNDSSARVQCVGPDLSPTSIGRRVVGKGTDC 278  
+S + + + +I ++N S+ V  
Sbjct 389 NFLQSCWNGLVAFVTPIFNSIKDWIINTWNTISSTT-----SAVWNTIKSF 434  
Query 279 VNRKWRQLSDIGGRIAGDILAADRASDFLGNLTTTCNGANFNAAADASSGGTGRNALRRQ 338  
++ W + + + +I A + + + + + +N ++  
Sbjct 435 LSLGWNISVSTASSVFNNIKEAISTVWNN---ISSTSSIIWNGIKSTLSNIWEGIKST-- 489  
Query 339 CYVRAIGNFPQSLFLPVSLEIEGKLYAALSSLQTDVA 377  
++ N + + PV + A + + + V  
Sbjct 490 --ASSVWNGLKDAIMTPVRWV--TNAVSGAFEGMKSAVL 524

> [ref|XP\\_002380327.1](#) **G** mucin, putative [Aspergillus flavus NRRL3357]  
[gb|EED49946.1](#) **G** mucin, putative [Aspergillus flavus NRRL3357]  
Length=565

GENE ID: 7919175 AFLA\_067680 | mucin, putative [Aspergillus flavus NRRL3357]

Score = 36.2 bits (81), Expect = 6.6, Method: Composition-based stats.  
Identities = 19/163 (11%), Positives = 36/163 (22%), Gaps = 15/163 (9%)

Query 32 WNPQPRTINQLPVSATSATPTQOSNVTLALGNRINTDTALTDYGTNVNGLGINVNR 91  
W+ P S T + +  
Sbjct 298 WSFPPSNAPAYAPPAHLGK--EFPMPSPKRRTLDDYVEDQPSKRVPMPPTLP----TSMS 350  
Query 92 RRRRRDIWNIENSNPVLAGLAANNPVGNSYIAIGNQVFHFLPNNLSNVSLNIASGSSGGAGQ 151  
+ + + P + + N ++ + LP S NIA G  
Sbjct 351 TLPSAALAGVPTLPPVLAATSAPSAN---SLSGSISRLPRPNPSSNIAPGIPTSVLP 406  
Query 152 TVPSNFTFLPMIPDNYTQAF--QKLVTFQTLPLDAMDSIVQ 192  
N + + O TQ + + V  
Sbjct 407 FPSVANRAM--HSVYNPSTNWVQLPPTQVPPITNGLYNPSVS 447

> [ref|XP\\_001026080.1](#) **G** SAM domain containing protein [Tetrahymena thermophila]

[gb|EAS05835.1](#) **G** SAM domain containing protein [Tetrahymena thermophila SB210]  
Length=694

[GENE\\_ID: 7837189](#) [TTHERM\\_00969610](#) | SAM domain containing protein  
[Tetrahymena thermophila]

Score = 36.2 bits (81), Expect = 8.0, Method: Composition-based stats.  
Identities = 28/264 (10%), Positives = 76/264 (28%), Gaps = 22/264 (8%)

```
Query 62 LALGNRINTDT---ALTDYGTNVNGLGINVNRRRRRRDIWNIESNPVLAGLAANNPVNG 118
      G+R T T + +Y V ++ + L N
Sbjct 47 RTSGSRWKTSTTDQPIKNYANQVLDKKNLNLTTQSSNTSSSTSKPVIKPPTLKIGNYTKP 106

Query 119 SYIAIGNQVFLPNNLSNVSLNIASGSSGGAGQTVPSNFTFLPMIPDNYTQAFQKLVTVQ 178
      + +++ P+NL N + + ++ + + L +
Sbjct 107 ETNQVQSKILKRPSNLPSNR-----PSSNQSSRSALNTSLNGKEKEKGENENLNSS 159

Query 179 FQTLPLDAMDSIVQTLSDAYSNTFKGLFTAAGLNLNETLEHGRS----VIE-----DG 228
      F+ + D+ VQ + + +F +T ++ V
Sbjct 160 FRKTLNQSFDNSVQQQASSSMTSFTQQTDTKEDKEEIQTDKNNSEYDFLVQNPNRKPKV 219

Query 229 IQSIVDQGAQGFEQVIASFNDSARVQCVGPDLSPTSIGRRVVGKGTDCVNRKRWQLSD 288
      I++ +++ +Q QV A + + + + V + +++ +Q +
Sbjct 220 IETKLNELSQNTQVNAYSQKKTQAESNLLKHLNQKELQKEVHQFLSTVNLQYQQAFE 279

Query 289 IGGRIAGDILAADRASDFLGNLT 312
      D+ ++ + ++
Sbjct 280 --DNGFDDLETILEINTEIMSMK 301
```

> [ref|YP\\_417175.1](#) **G** phage-like protein [Staphylococcus aureus RF122]

[emb|CAI81402.1](#) **G** hypothetical phage-related protein [Staphylococcus aureus RF122]  
Length=1154

[GENE\\_ID: 3795178](#) [SAB1713c](#) | phage-like protein [Staphylococcus aureus RF122]  
(10 or fewer PubMed links)

Score = 36.2 bits (81), Expect = 8.1, Method: Composition-based stats.  
Identities = 17/183 (9%), Positives = 52/183 (28%), Gaps = 5/183 (2%)

```
Query 125 NQVFLPNNLSNVSLNIASGSSGGAGQTVPSNFTFLPMIPDNYTQAFQKLVTVQFQTLPL 184
      N ++ L N + +A+ + + I + + + L T+
Sbjct 863 NAIWTFQLQTLWNTIVTVATTWNAITTAISTALQAAWSFISNIWNTIWSFLSGILTTIWN 922

Query 185 DAMD--SIVQTLSDAYSNTFKGLFTAAGLNLNETLEHGRSVIEDGIQSIQVQGAQGFEQ 242
      + + V + + + G+ ++ + + IQ V+ + +
Sbjct 923 KVVSIFTQVVSITSDKMSQAWNFIVTKGMQVWSTITSTLINFVNRVQQGFVNVVNVKVSQG 982

Query 243 VIASFNDSARVQCVGPDLSPTSIGRRVVGKGTDCVNRKRWQLSDIGGRIAGDILAADR 302
      + + N + + + V + + R ++ + ++ + +A
Sbjct 983 MTNAVNKIKSFIGDFVSAGA---DMIRGLIRGIGMAGQLVDAAKNVAKKALDAAKSALG 1039

Query 303 GAS 305
      S
Sbjct 1040 IHS 1042
```

> [ref|XP\\_002720066.1](#) **UG** PREDICTED: inter-alpha (globulin) inhibitor H5-like [Oryctolagus cuniculus]  
Length=1320

[GENE\\_ID: 100343166](#) [LOC100343166](#) | inter-alpha (globulin) inhibitor H5-like  
[Oryctolagus cuniculus]

Score = 36.2 bits (81), Expect = 8.4, Method: Composition-based stats.  
Identities = 35/288 (12%), Positives = 69/288 (23%), Gaps = 33/288 (11%)

```
Query 18 IIPWYVDAFLFTFPWNPQPRTINQLPVTSATS---ATTPTQSSNVTLALGNRINTDTAL 74
      W +P +Q + S TP + R T
Sbjct 843 PKSWITSPKTPKITSLSFKPSAPPHQSSTSLLLSKPRTLPHTPKTLPLRSARPRTPLRQ 902

Query 75 TDYGTNVNGLGINVNRRRRRRDIWNIESNPVLAGLAANNPVN-----GSYIAI- 123
      V P + + P GS
Sbjct 903 NLSTFPPTVSSPTVPSTTVTSTGFGEPLTPPTVPSLSPTGRLWHQHDLGSLQSTRK 962

Query 124 --GNQVFLHPN-NLSNVSLNIASGSSGGAGQTVPSNFTFLPMIPDNYTQAFQKLVTVQFQ 180
      G V +P +L N S GS +PS+ + +
Sbjct 963 VLGPSVAGVPTMSPNSRPTPEGSPPNVVLLPSSTLPEAISLFLPEELKLLSESVMVE 1022

Query 181 TLPLDAMDSIVQTL-----SDAYSNTFKGLFTAAGLNLNETLEHGRSVIEDGIQ-- 230
      ++++D S +++ + + AG +++ RS +E
Sbjct 1023 AKFVESLDPFAYTFLTPDEDGSPHWTDKSEEILGGAG----GSMKSQRSVELAKDML 1077

Query 231 -SIVDQGAQGFEQVIASFNDSARVQCVGPDLSPTSIGRRVVGKGTDCVNRKRWQLSD 277
      SI + + + C D P + + +
Sbjct 1078 PSIFTFSSVDGDPHFVVRIPHSEERICFTLDGRPGDVLQIEDPKAG 1125
```

> [ref|ZP\\_04675278.1](#) conserved hypothetical protein [Lactobacillus jensenii 1153]  
[gb|EEO69064.1](#) conserved hypothetical protein [Lactobacillus jensenii 1153]  
Length=2110

Score = 35.8 bits (80), Expect = 8.7, Method: Composition-based stats.  
Identities = 17/161 (10%), Positives = 38/161 (23%), Gaps = 12/161 (7%)

```
Query 189 SIVQTLSDAYSNTFKGLFTAAGLNLNETLEHGRSVIEDGIQSIQVQGAQGFEQVIASFN 248
      + L +A ++ T N ++T ++ D A ++V + N
Sbjct 1623 TDKSKLDEAITDANNTKLTDKYNNASDDTKSKFDEALKKAENKNDNSAT-QKEVDATN 1681

Query 249 DSSARVQCVGPDLSPTSIGRRV-----GKGTDCVNRKRWQLSDIGGRIAGDI 297
      + + + + + D K+ + + +
Sbjct 1682 NLKQAQNLDGQTTDKSKLDEAITDANNTKSTDKYNNASDDTKSKFDEALKKAEEVKNS 1741

Query 298 LAADRASDFLGNLTTCNGANFNAADASSGGTGRNALRRQ 338
      A + D NL S
Sbjct 1742 NATQKEVDDATNKLKQAQNLDGQTTDKSKLDEAITDANNT 1782
```

> [ref|ZP\\_05414794.1](#) putative fibronectin type III domain protein [Bacteroides finegoldii DSM 17565]

[gb|EFX46343.1](#) putative fibronectin type III domain protein [Bacteroides finegoldii  
DSM 17565]  
Length=611

Score = 35.8 bits (80), Expect = 9.7, Method: Composition-based stats.  
Identities = 32/261 (12%), Positives = 64/261 (24%), Gaps = 23/261 (8%)

```
Query 2 NRSMSVVLALLIAAIGIIPWYVDAFLFTTPWNPQPPRTINQLFVTSATSATTPQQSNVT 61
      M ++ P L P Q T TP+ + T
Sbjct 221 MTVMPEMVDFTSV---TPTKTSVSLVWDEAIQTGSTTVSHYAWCGGD-RTPSVSDHYT 275

Query 62 LALGNRINTDALTDDYGTINVNLGINVNR--RRRRRDIWNIESNPVLAGLAA---NNPV 116
      +I+ D + R R + P L +
Sbjct 276 ALTAEQISQGLNFDGLEPSTTYTVALMRGTYVRLTFTTAKGIPSGYTLVSVTDITTW 335

Query 117 NGSYIAIGNQVFHLPNNLSNVSLNLIASGSSGGAGQTVPSNFSFLPMIPDNYTQAFQKLV 176
      N + G +P N I + + +
Sbjct 336 NEAISKTKGVAVLIPENTDLDLTGITPEIQSITSLLIWGADIEGNPTNTKPSIKTKGPN 395

Query 177 TQFQTLPLDAMDSIVQTLSDAYSNTFKGLFTAAGLNLNETLEHGRSVIEDGIQSIQVDQG 236
      + ++ YSN +AG +++ + ++ I+S V
Sbjct 396 -----FNGTLGTVFYNLHLYSN-----GSAGNYIVDQ-KKADNNTNFSIESCVIDE 442

Query 237 AQQFEQVIASFNDSARVQQC 257
      A+G ++ + S ++ C
Sbjct 443 ARGLFRIRNTGVWQSIKDC 463
```

> [gb|ACA52029.1](#) surface anchor protein [Lactobacillus jensenii]  
Length=1903

Score = 35.8 bits (80), Expect = 9.7, Method: Composition-based stats.  
Identities = 17/161 (10%), Positives = 38/161 (23%), Gaps = 12/161 (7%)

```
Query 189 SIVQTLSDAYSNTFKGLFTAAGLNLNETLEHGRSVIEDGIQSIQVDQGAQQFEQVIASFN 248
      + L +A ++ T N ++T ++ D A ++V + N
Sbjct 1416 TDKSKLDEAITDANNTKLTDKYNNASDDTKSKFDEALKKAENKNDNSNAT-QKEVDDATN 1474

Query 249 DSSARVQQCVGPDLSPTSIGRRVV-----GKGTDCVNRKWRQLSDIGGRIAGDI 297
      + G + + + +D K+ + + +
Sbjct 1475 NLKQAQNLDLGGTQTDKSKLDEAITDANNTKSTDKYNNASDDTKSKFDEALKKAEVKNNS 1534

Query 298 LAADRASDFLGNLTTTCNGANFNADASSGGTGRNALRRQ 338
      A + D NL S
Sbjct 1535 NATQKEVDDATNNLKQAQNLDGQTTDKSKLDEAITDANNT 1575
```

Select All [Get selected sequences](#) [Distance tree of results](#) [Multiple alignment](#)
