# Supplementary material
Source: PubMed Central journal article supplement (PMC2950210)

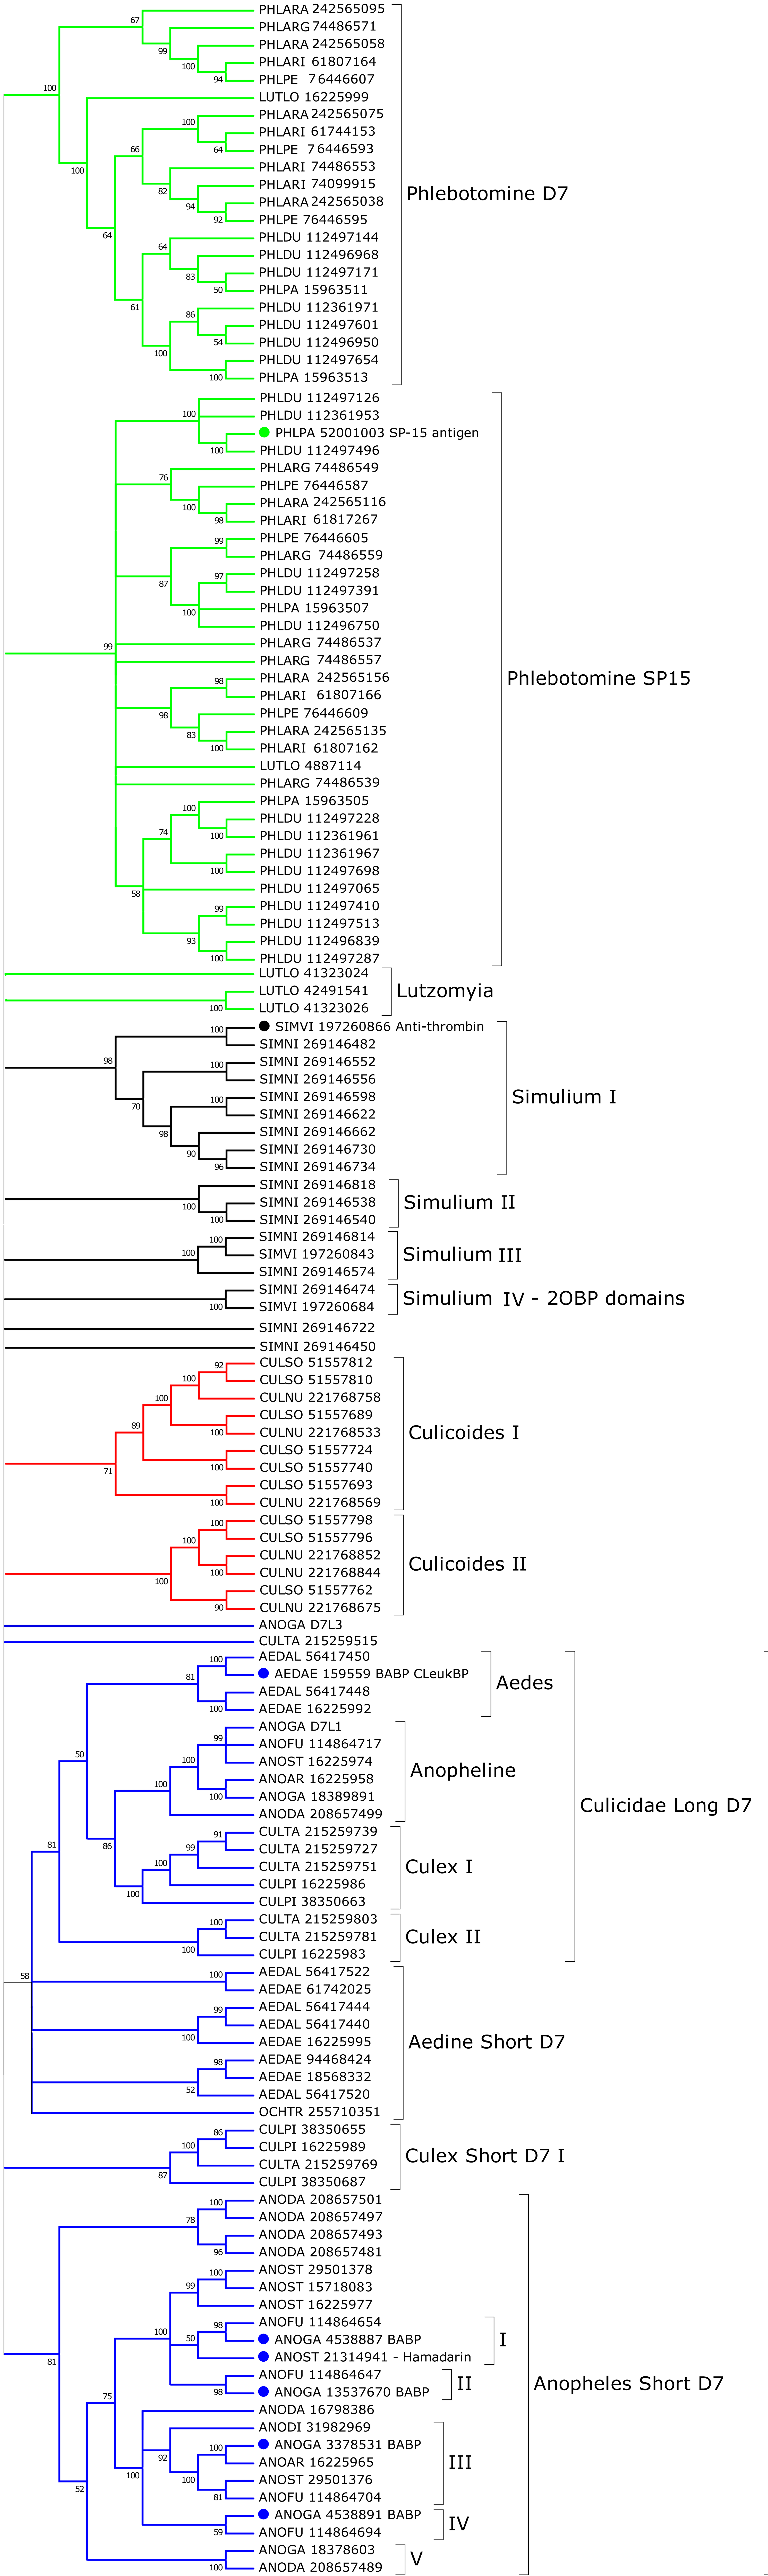

Supplement: NIHMS231853-supplement-02.pdf [file NIHMS231853-supplement-02.pdf]
